# Supplementary material for: Transcriptome Analysis of Long Non-Coding RNA in the Bovine Mammary Gland Following Dietary Supplementation with Linseed and Safflower Oil<strong> </strong>
Source: Preprints.org preprint supplement (doi:10.20944/preprints201810.0185.v1), 2018-10-09
Supplement: Supplementary file 1 [file Suppelmentary File 5_GO and KEGG pathways.xlsx]

## Sheet: 5A_SFo GO term 
Additional file 5a: GO terms enriched for cis target genes of lncRNAs in saflower oil treatment
GOID	GOTerm	Ontology Source	Term PValue	Term PValue Corrected with Benjamini-Hochberg	Group PValue	Group PValue Corrected with Benjamini-Hochberg	GOLevels	GOGroups	% Associated Genes	Nr. Genes	Associated Genes Found
GO:0048294	negative regulation of isotype switching to IgE isotypes	GO_BiologicalProcess	1.5e-05	0.0026	0.0011	0.0055	[4, 5, 6, 7, 8, 9, 10, 11, 12, 13, 14, 15]	Group28	100	3	[BCL6, FOXP3, NDFIP1]
GO:0045910	negative regulation of DNA recombination	GO_BiologicalProcess	1.1e-05	0.0042	0.0011	0.0055	[5, 6, 7, 8, 9]	Group28	27.2727	6	[BCL6, FBXO18, FOXP3, HELB, NDFIP1, TERF2]
GO:0045829	negative regulation of isotype switching	GO_BiologicalProcess	5.9e-05	0.007	0.0011	0.0055	[3, 4, 5, 6, 7, 8, 9, 10, 11, 12, 13, 14]	Group28	75	3	[BCL6, FOXP3, NDFIP1]
GO:0010633	negative regulation of epithelial cell migration	GO_BiologicalProcess	8.6e-05	0.0077	0.0025	0.006	[3, 4, 5, 6, 7, 8, 9]	Group21	13.7931	8	[ADIPOR1, MCC, NR2F2, PFN2, SEMA3A, SERPINF1, SRFBP1, STARD13]
GO:0006396	RNA processing	GO_BiologicalProcess	0.0001	0.0077	0.00034	0.0024	[5, 6, 7]	Group22	4.52156	43	[AARS, AQR, CDK12, CDK13, CHERP, CLK1, CLK4, COLEC12, CPSF3, DDX5, DHX15, DHX16, ESR1, EXOSC1, GRSF1, HELB, INTS12, INTS2, INTS4, KDM1A, KHDRBS1, KIN, MAK16, NOP2, PABPN1, PDE12, POLR2B, PPWD1, PRPF38B, PSPC1, RAVER1, RBMS2, RBMX2, SLBP, SLTM, SPEN, SRFBP1, SRSF1, SYMPK, THRAP3, WDR12, WDR62, WDR77]
GO:0002262	myeloid cell homeostasis	GO_BiologicalProcess	0.00022	0.011	0.0011	0.0055	[2, 5]	Group28	8.4507	12	[ADAM17, ARID4A, B2M, BCL6, BMP4, FOXP3, GATA2, ID2, KDM1A, KMT2E, SENP1, ZNF16]
GO:0000018	regulation of DNA recombination	GO_BiologicalProcess	0.00032	0.011	0.0011	0.0055	[5, 6, 7, 8]	Group28	11.4286	8	[BCL6, FBXO18, FOXP3, HELB, KDM1A, NDFIP1, TERF2, UBE2B]
GO:0030218	erythrocyte differentiation	GO_BiologicalProcess	0.0003	0.011	0.0011	0.0055	[4, 6, 7, 8, 9]	Group28	9.43396	10	[ARID4A, B2M, BCL6, BMP4, GATA2, ID2, KDM1A, KMT2E, SENP1, ZNF16]
GO:1902679	negative regulation of RNA biosynthetic process	GO_BiologicalProcess	0.00021	0.012	0.00021	0.0062	[5, 6, 7, 8, 9]	Group20	4.14634	51	[ARID4A, BCL3, BCL6, BMP4, CHD4, CREG1, DDX5, DR1, ESR1, FOXP3, GATA2, H2AFJ, ID2, IKZF5, KDM1A, KDM4A, KHDRBS1, MED25, MZF1, NAB2, NFIB, NPAT, NR2F2, PIAS1, PPID, PRICKLE1, PSPC1, RSF1, SMAD7, SMARCC2, SMURF2, SNX6, SPEN, SRFBP1, TAF3, TBX2, TLE1, TONSL, TRIM27, TRIM8, UBE2B, UBE2I, UHRF2, ZBTB1, ZBTB38, ZEB1, ZFP57, ZNF263, ZNF268, ZNF304, ZNF354A]
GO:0048289	isotype switching to IgE isotypes	GO_BiologicalProcess	0.00049	0.015	0.0011	0.0055	[4, 5, 6, 7, 8, 9, 10, 11, 12, 13]	Group28	42.8571	3	[BCL6, FOXP3, NDFIP1]
GO:0048293	regulation of isotype switching to IgE isotypes	GO_BiologicalProcess	0.00049	0.015	0.0011	0.0055	[5, 6, 7, 8, 9, 10, 11, 12, 13, 14]	Group28	42.8571	3	[BCL6, FOXP3, NDFIP1]
GO:0045646	regulation of erythrocyte differentiation	GO_BiologicalProcess	0.00062	0.017	0.0011	0.0055	[3, 4, 5, 6, 7, 8, 9, 10]	Group28	13.9535	6	[B2M, GATA2, ID2, KDM1A, SENP1, ZNF16]
GO:0034101	erythrocyte homeostasis	GO_BiologicalProcess	0.00062	0.018	0.0011	0.0055	[3, 6]	Group28	8.62069	10	[ARID4A, B2M, BCL6, BMP4, GATA2, ID2, KDM1A, KMT2E, SENP1, ZNF16]
GO:0002638	negative regulation of immunoglobulin production	GO_BiologicalProcess	0.00077	0.018	0.0011	0.0055	[4, 5, 6, 7]	Group28	37.5	3	[BCL6, FOXP3, NDFIP1]
GO:0045654	positive regulation of megakaryocyte differentiation	GO_BiologicalProcess	0.00077	0.018	0.0011	0.0055	[5, 6, 7, 8, 9, 10, 11]	Group28	37.5	3	[GATA2, KDM1A, ZNF16]
GO:0045892	negative regulation of transcription, DNA-templated	GO_BiologicalProcess	0.00076	0.019	0.00021	0.0062	[5, 6, 7, 8, 9, 10, 11]	Group20	4.01709	47	[ARID4A, BCL3, BCL6, BMP4, CHD4, DDX5, DR1, ESR1, FOXP3, GATA2, H2AFJ, ID2, IKZF5, KDM1A, KDM4A, KHDRBS1, MED25, MZF1, NAB2, NFIB, NR2F2, PIAS1, PPID, PRICKLE1, PSPC1, RSF1, SMAD7, SMARCC2, SMURF2, SNX6, SPEN, SRFBP1, TAF3, TBX2, TLE1, TRIM27, UBE2B, UBE2I, UHRF2, ZBTB1, ZBTB38, ZEB1, ZFP57, ZNF263, ZNF268, ZNF304, ZNF354A]
GO:0060840	artery development	GO_BiologicalProcess	0.00096	0.02	0.0072	0.0078	[4, 6, 7, 8, 9]	Group19	9.7561	8	[BMP4, GJA5, LRP1, LUZP1, MYH10, PRICKLE1, SMAD7, TBX2]
GO:0016071	mRNA metabolic process	GO_BiologicalProcess	0.0012	0.024	0.00034	0.0024	[5, 6, 7]	Group22	4.41379	32	[AQR, CDK12, CDK13, CHERP, COLEC12, CPSF3, DCP2, DDX5, DHX15, DHX16, EXOSC1, GRSF1, KDM1A, KHDRBS1, KIN, PABPN1, PDE12, POLR2B, PPWD1, PRPF38B, PSPC1, RAVER1, RBMX2, SLBP, SLTM, SPEN, SRFBP1, SRSF1, SYMPK, THRAP3, WDR77, ZBTB1]
GO:1903706	regulation of hemopoiesis	GO_BiologicalProcess	0.0016	0.027	0.0011	0.0055	[3, 4, 5, 6, 7, 8]	Group28	5.42169	18	[AGER, ARID4A, ATP11C, B2M, BCL6, BMP4, FOXP3, GATA2, GPR68, HLX, ID2, KDM1A, NDFIP1, SENP1, TMEM64, ZBTB1, ZEB1, ZNF16]
GO:0010720	positive regulation of cell development	GO_BiologicalProcess	0.0018	0.028	0.0018	0.0059	[4, 5, 6, 7]	Group13	4.7619	24	[BCL6, BMP4, CRKL, CYB5D2, GATA2, GPR68, GPRC5B, HAS2, ID2, KDM1A, KDM4A, LIG4, MARK2, MMD, OPA1, PRPF38B, S1PR2, SEMA3A, SEMA7A, SERPINF1, SPEN, TCF12, TMEM106B, ZEB1]
GO:0060602	branch elongation of an epithelium	GO_BiologicalProcess	0.0019	0.028	0.00066	0.0038	[5, 6, 7]	Group18	18.1818	4	[BMP4, ESR1, RDH10, SPRY1]
GO:0002829	negative regulation of type 2 immune response	GO_BiologicalProcess	0.0021	0.03	0.00021	0.0031	[4, 5, 6]	Group26	27.2727	3	[BCL6, HLX, NDFIP1]
GO:0003158	endothelium development	GO_BiologicalProcess	0.0023	0.032	0.0023	0.0063	[5]	Group11	7.75862	9	[BMP4, GJA5, GSTM3, KDM6B, NR2F2, S1PR2, STARD13, VEZF1, ZEB1]
GO:0010632	regulation of epithelial cell migration	GO_BiologicalProcess	0.0025	0.032	0.0025	0.006	[3, 4, 5, 6, 7, 8]	Group21	6.41711	12	[ADIPOR1, BMP4, CAPN7, ENPP2, HAS2, MCC, NR2F2, PFN2, SEMA3A, SERPINF1, SRFBP1, STARD13]
GO:0006260	DNA replication	GO_BiologicalProcess	0.0037	0.034	0.0037	0.0057	[5, 6, 7]	Group00	5.15152	17	[BCL6, BMP4, CDC25A, FBXO18, HELB, KIN, LIG4, NCOA6, NFIB, ORC4, PDGFC, PNKP, POLG2, SLBP, TERF2, TONSL, ZBTB38]
GO:0002064	epithelial cell development	GO_BiologicalProcess	0.0027	0.034	0.0027	0.006	[4, 5, 6]	Group16	6.07477	13	[ARID4A, ARID4B, BMP4, DHX15, ESR1, EXPH5, FEM1B, FOSL2, GSTM3, PODXL, S1PR2, SHROOM3, VEZF1]
GO:0060442	branching involved in prostate gland morphogenesis	GO_BiologicalProcess	0.0028	0.034	0.00066	0.0038	[4, 5, 6, 7, 8, 9, 10]	Group18	25	3	[BMP4, ESR1, FEM1B]
GO:0045623	negative regulation of T-helper cell differentiation	GO_BiologicalProcess	0.0028	0.034	0.00021	0.0031	[4, 5, 6, 7, 8, 9, 10, 11, 12, 13, 14, 15, 16]	Group26	25	3	[BCL6, FOXP3, HLX]
GO:0045648	positive regulation of erythrocyte differentiation	GO_BiologicalProcess	0.0036	0.034	0.0011	0.0055	[3, 4, 5, 6, 7, 8, 9, 10, 11]	Group28	15.3846	4	[GATA2, ID2, KDM1A, ZNF16]
GO:0035561	regulation of chromatin binding	GO_BiologicalProcess	0.0031	0.036	0.0031	0.0064	[4]	Group03	16	4	[FBXO18, KDM1A, MED25, ZNF304]
GO:1903708	positive regulation of hemopoiesis	GO_BiologicalProcess	0.0034	0.036	0.0011	0.0055	[3, 4, 5, 6, 7, 8, 9]	Group28	6.47059	11	[AGER, ATP11C, FOXP3, GATA2, GPR68, HLX, ID2, KDM1A, TMEM64, ZBTB1, ZNF16]
GO:0045620	negative regulation of lymphocyte differentiation	GO_BiologicalProcess	0.0032	0.037	0.00021	0.0031	[5, 6, 7, 8, 9, 10, 11]	Group26	12.1951	5	[BCL6, BMP4, FOXP3, HLX, ID2]
GO:0070076	histone lysine demethylation	GO_BiologicalProcess	0.0047	0.038	0.0077	0.008	[5, 6, 7, 8, 9, 10]	Group23	14.2857	4	[KDM1A, KDM4A, KDM6B, UBE2B]
GO:1903573	negative regulation of response to endoplasmic reticulum stress	GO_BiologicalProcess	0.0049	0.038	0.0058	0.007	[3, 4, 5, 6, 7]	Group25	11.1111	5	[CREB3L1, OPA1, PPP1R15B, SYVN1, YOD1]
GO:1902105	regulation of leukocyte differentiation	GO_BiologicalProcess	0.0044	0.038	0.0011	0.0055	[4, 5, 6, 7, 8, 9]	Group28	5.5336	14	[AGER, ARID4A, ATP11C, BCL6, BMP4, FOXP3, GATA2, GPR68, HLX, ID2, NDFIP1, TMEM64, ZBTB1, ZEB1]
GO:0030968	endoplasmic reticulum unfolded protein response	GO_BiologicalProcess	0.0056	0.042	0.0058	0.007	[3, 4, 5, 6, 7]	Group25	6.81818	9	[AARS, ATF6B, CREB3L1, DZIP3, EDEM3, PPP1R15B, SYVN1, TLN1, YOD1]
GO:0016577	histone demethylation	GO_BiologicalProcess	0.0061	0.043	0.0077	0.008	[4, 5, 6, 7, 8, 9]	Group23	13.3333	4	[KDM1A, KDM4A, KDM6B, UBE2B]
GO:1902106	negative regulation of leukocyte differentiation	GO_BiologicalProcess	0.0062	0.043	0.0011	0.0055	[4, 5, 6, 7, 8, 9, 10]	Group28	7.95455	7	[BCL6, BMP4, FOXP3, GATA2, GPR68, HLX, ID2]
GO:0016447	somatic recombination of immunoglobulin gene segments	GO_BiologicalProcess	0.0059	0.043	0.0011	0.0055	[4, 5, 7, 8, 9, 10]	Group28	10.6383	5	[BCL6, FOXP3, LIG4, NDFIP1, POLG2]
GO:0006349	regulation of gene expression by genetic imprinting	GO_BiologicalProcess	0.0066	0.045	0.0066	0.0077	[5, 6, 7]	Group01	18.75	3	[ARID4A, ARID4B, ZFP57]
GO:0002467	germinal center formation	GO_BiologicalProcess	0.0066	0.045	0.00021	0.0031	[3, 4, 5]	Group26	18.75	3	[ADAM17, BCL3, BCL6]
GO:0045064	T-helper 2 cell differentiation	GO_BiologicalProcess	0.0066	0.045	0.00021	0.0031	[4, 5, 6, 7, 8, 9, 10, 11, 12, 13, 14, 15]	Group26	18.75	3	[BCL3, BCL6, HLX]
GO:0045652	regulation of megakaryocyte differentiation	GO_BiologicalProcess	0.0066	0.045	0.0011	0.0055	[5, 6, 7, 8, 9, 10]	Group28	18.75	3	[GATA2, KDM1A, ZNF16]
GO:0001568	blood vessel development	GO_BiologicalProcess	0.0072	0.047	0.0072	0.0078	[3, 5, 6, 7, 8]	Group19	4.16	26	[BMP4, COL8A2, CRKL, ENPP2, ERAP1, GATA2, GJA5, HAS2, LRP1, LUZP1, MYH10, NAA15, NR2F2, PDE3B, PLCD3, PRICKLE1, RASA1, SERPINF1, SMAD7, STARD13, TBX2, TNFAIP2, VAV3, VEZF1, WARS2, ZNF304]
GO:0034620	cellular response to unfolded protein	GO_BiologicalProcess	0.0071	0.047	0.0058	0.007	[5, 6]	Group25	6.56934	9	[AARS, ATF6B, CREB3L1, DZIP3, EDEM3, PPP1R15B, SYVN1, TLN1, YOD1]
GO:0006482	protein demethylation	GO_BiologicalProcess	0.0077	0.048	0.0077	0.008	[3, 4, 7, 8]	Group23	12.5	4	[KDM1A, KDM4A, KDM6B, UBE2B]
GO:0050869	negative regulation of B cell activation	GO_BiologicalProcess	0.0077	0.048	0.0011	0.0055	[5, 6, 7, 8]	Group28	12.5	4	[BCL6, FOXP3, ID2, NDFIP1]
GO:2000241	regulation of reproductive process	GO_BiologicalProcess	0.0082	0.049	0.0082	0.0082	[2, 3]	Group10	6.42857	9	[BMP4, ESR1, MOCOS, RNASE10, SEMA3A, SERPINF1, SMURF2, UBE2B, WDR77]
GO:0048872	homeostasis of number of cells	GO_BiologicalProcess	0.0077	0.049	0.0011	0.0055	[4]	Group28	5.18518	14	[ADAM17, ARID4A, B2M, BCL6, BMP4, CD7, FOXP3, GATA2, ID2, KDM1A, KMT2E, POLG2, SENP1, ZNF16]
GO:0031252	cell leading edge	GO_CellularComponent	0.00083	0.018	0.0014	0.0058	[2, 3]	Group24	5.35714	21	[ABCA7, ADAM17, ARF6, ARHGEF6, EPS8, IQGAP2, KLHL2, LCP1, MCC, MKLN1, MYH10, MYO1G, PDE4A, PIEZO1, PODXL, RAPH1, RASA1, SLC39A6, SYNE2, TLN1, TPM1]
GO:0031256	leading edge membrane	GO_CellularComponent	0.0015	0.025	0.0021	0.0063	[3, 4, 5, 6]	Group27	7.18954	11	[ABCA7, ADAM17, EPS8, LCP1, MYO1G, PDE4A, PIEZO1, SLC39A6, SYNE2, TLN1, TPM1]
GO:0001726	ruffle	GO_CellularComponent	0.0014	0.026	0.0021	0.0063	[3, 4]	Group27	6.85714	12	[ABCA7, ADAM17, ARF6, EPS8, KLHL2, LCP1, MKLN1, PDE4A, PODXL, RASA1, TLN1, TPM1]
GO:0042581	specific granule	GO_CellularComponent	0.0038	0.033	0.0038	0.0055	[4, 5, 7, 8, 9, 10]	Group05	6.39535	11	[AGPAT2, ANXA11, ATP6V1D, B2M, CRISP3, GGH, QSOX1, TMC6, TSPAN14, UBR4, VAMP8]
GO:0032039	integrator complex	GO_CellularComponent	0.0035	0.035	0.0035	0.0061	[3, 5, 6, 7, 8, 9, 10, 11, 12, 13]	Group02	23.0769	3	[INTS12, INTS2, INTS4]
GO:0031253	cell projection membrane	GO_CellularComponent	0.0034	0.037	0.0021	0.0063	[3, 4, 5, 6, 7]	Group27	5.19878	17	[ABCA7, ADAM17, ARF6, CA9, CNGA1, EPS8, LCP1, PDE4A, PDE7A, PIEZO1, PODXL, SLC26A6, SLC34A2, SLC39A6, SYNE2, TLN1, TPM1]
GO:0098858	actin-based cell projection	GO_CellularComponent	0.0044	0.038	0.0014	0.0058	[3, 4]	Group24	5.97015	12	[ARF6, ATP6V1E1, CA9, EPS8, IQGAP2, KIF13B, LCP1, MYO1G, NFASC, PODXL, RAPH1, SYNE2]
GO:0005902	microvillus	GO_CellularComponent	0.0058	0.043	0.0014	0.0058	[4, 5]	Group24	8.04598	7	[ATP6V1E1, CA9, IQGAP2, KIF13B, MYO1G, NFASC, PODXL]
GO:0055037	recycling endosome	GO_CellularComponent	0.0066	0.044	0.0066	0.0074	[4, 5, 6, 7, 8, 9]	Group07	6.25	10	[ARF6, ATP11C, B2M, DENND6A, FZD7, LMTK2, SH3TC2, VAMP8, VPS53, VTI1B]
GO:0051731	polynucleotide 5'-hydroxyl-kinase activity	GO_MolecularFunction	0.00028	0.012	0.00028	0.0027	[5, 6]	Group06	50	3	[COLEC12, N4BP2, PNKP]
GO:0008134	transcription factor binding	GO_MolecularFunction	0.0014	0.026	0.0014	0.0053	[3]	Group09	4.63122	27	[BCL3, CDK12, CDK13, CHD4, CREG1, DR1, ENPP2, ESR1, EYA2, FOXP3, GATA2, KDM1A, MED13, MED25, NAB2, NCOA6, NFYB, PBX2, PIAS1, PPID, SPEN, TCF12, THRAP3, TLE1, TP53BP2, UBE2I, ZEB1]
GO:0051020	GTPase binding	GO_MolecularFunction	0.0036	0.034	0.0036	0.0058	[4]	Group17	5.04202	18	[ANKFY1, EPS8, EXOC8, EXPH5, FMNL2, GGA1, IPO4, IQGAP2, LCP1, MAP3K11, PRICKLE1, PRPF38B, RABGAP1, RASA1, TBC1D7, TBC1D9B, USP6NL, WHAMM]
GO:0019787	ubiquitin-like protein transferase activity	GO_MolecularFunction	0.0035	0.036	0.0035	0.0064	[3]	Group14	4.67091	22	[BIRC2, CUL1, DZIP3, FBXL3, FBXO3, FBXO9, FEM1B, IPP, KLHL18, KLHL2, LRSAM1, PIAS1, RNF181, RNF43, SMURF2, SYVN1, TRIM23, TRIM27, UBE2B, UBE2I, UBR4, UHRF2]
GO:0030374	ligand-dependent nuclear receptor transcription coactivator activity	GO_MolecularFunction	0.0033	0.037	0.0033	0.0064	[5]	Group15	10.1695	6	[CHERP, KDM1A, MED13, NCOA6, THRAP3, WDR77]
GO:0005089	Rho guanyl-nucleotide exchange factor activity	GO_MolecularFunction	0.0048	0.038	0.0048	0.0063	[4]	Group12	8.33333	7	[ARHGEF19, ARHGEF39, ARHGEF6, PREX2, PRPF38B, SOS2, VAV3]
GO:0060589	nucleoside-triphosphatase regulator activity	GO_MolecularFunction	0.0047	0.039	0.0047	0.0065	[3]	Group08	4.91803	18	[ACAP3, ARHGAP39, ARHGEF19, ARHGEF6, DNAJB4, IQGAP2, NCAPH, PFN2, PREX2, RABGAP1, RALGAPB, RASA1, RIN2, STARD13, TBC1D7, TBC1D9B, USP6NL, VAV3]
GO:0035591	signaling adaptor activity	GO_MolecularFunction	0.0058	0.043	0.0058	0.0073	[3]	Group04	8.04598	7	[CRKL, EPS8, KHDRBS1, SH2B1, SH2B3, TP53BP2, VAV3]
GO:0031267	small GTPase binding	GO_MolecularFunction	0.0078	0.048	0.0036	0.0058	[5]	Group17	4.89297	16	[ANKFY1, EPS8, EXOC8, EXPH5, FMNL2, GGA1, IPO4, IQGAP2, MAP3K11, PRICKLE1, PRPF38B, RABGAP1, TBC1D7, TBC1D9B, USP6NL, WHAMM]

## Sheet: 5b_SFO KEGG 
Additional file 5b: KEGG pathways enriched for cis target genes of lncRNAs in saflower oil treatment
GOID	GOTerm	Ontology Source	Term PValue	Term PValue Corrected with Benjamini-Hochberg	Group PValue	Group PValue Corrected with Benjamini-Hochberg	GOLevels	GOGroups	% Associated Genes	Nr. Genes	Associated Genes Found
GO:0004130	SNARE interactions in vesicular transport	KEGG_01.03.2017	0.004	0.086	0.004	0.04	[-1]	Group05	11.7647	4	[BET1L, VAMP4, VAMP8, VTI1B]
GO:0004810	Regulation of actin cytoskeleton	KEGG_01.03.2017	0.006	0.087	0.004	0.02	[-1]	Group09	5.18868	11	[ARHGEF6, CRKL, IQGAP2, ITGA2B, MYH10, PAK4, PDGFC, PFN2, PPP1R12A, SOS2, VAV3]
GO:0004350	TGF-beta signaling pathway	KEGG_01.03.2017	0.027	0.14	0.027	0.038	[-1]	Group06	5.95238	5	[BMP4, CUL1, ID2, SMAD7, SMURF2]
GO:0004024	cAMP signaling pathway	KEGG_01.03.2017	0.025	0.15	0.023	0.046	[-1]	Group08	4.54545	9	[ADCY10, CNGA1, CREB3L1, GABBR1, ORAI1, PDE3B, PDE4A, PPP1R12A, VAV3]
GO:0000510	N-Glycan biosynthesis	KEGG_01.03.2017	0.014	0.16	0.014	0.049	[-1]	Group00	8.16327	4	[ALG12, FUT8, MAN1A2, MGAT1]
GO:0004510	Focal adhesion	KEGG_01.03.2017	0.0037	0.16	0.004	0.02	[-1]	Group09	5.52764	11	[BIRC2, COL9A1, CRKL, ITGA2B, PAK4, PDGFC, PPP1R12A, SOS2, TLN1, TNXB, VAV3]
GO:0004120	Ubiquitin mediated proteolysis	KEGG_01.03.2017	0.024	0.17	0.024	0.041	[-1]	Group04	5.10949	7	[BIRC2, CUL1, PIAS1, SMURF2, SYVN1, UBE2B, UBE2I]
GO:0004915	Estrogen signaling pathway	KEGG_01.03.2017	0.048	0.18	0.048	0.048	[-1]	Group02	5.10204	5	[ATF6B, CREB3L1, ESR1, GABBR1, SOS2]
GO:0005120	Epithelial cell signaling in Helicobacter pylori infection	KEGG_01.03.2017	0.044	0.18	0.044	0.048	[-1]	Group03	5.88235	4	[ADAM17, ATP6V1D, ATP6V1E1, IKBKG]
GO:0003040	Spliceosome	KEGG_01.03.2017	0.022	0.19	0.022	0.055	[-1]	Group01	5.22388	7	[AQR, CHERP, DDX5, DHX15, DHX16, PRPF38B, SRSF1]
GO:0004611	Platelet activation	KEGG_01.03.2017	0.041	0.19	0.041	0.052	[-1]	Group07	4.87805	6	[ITGA2B, ORAI1, PPP1R12A, PRKG2, TLN1, VAMP8]

## Sheet: 5c_LSO GO
Additional file 5c: GO terms enriched for cis target genes of lncRNAs in linseed oil treatment
GOID	GOTerm	Ontology Source	Term PValue	Term PValue Corrected with Benjamini-Hochberg	Group PValue	Group PValue Corrected with Benjamini-Hochberg	GOLevels	GOGroups	% Associated Genes	Nr. Genes	Associated Genes Found
GO:1904375	regulation of protein localization to cell periphery	GO_BiologicalProcess	8.4e-05	0.00036	7.6e-05	0.00023	[5, 6]	Group1	5.26316	4	[ARF6, NUMB, VAMP8, VTI1B]
GO:1903729	regulation of plasma membrane organization	GO_BiologicalProcess	0.00011	0.00038	7.6e-05	0.00023	[4, 5, 6]	Group1	4.81928	4	[ARF6, NUMB, VAMP8, VTI1B]
GO:1903076	regulation of protein localization to plasma membrane	GO_BiologicalProcess	7.2e-05	0.00046	7.6e-05	0.00023	[5, 6, 7]	Group1	5.47945	4	[ARF6, NUMB, VAMP8, VTI1B]
GO:0060412	ventricular septum morphogenesis	GO_BiologicalProcess	0.0002	0.00054	0.00023	0.00034	[4, 5, 6, 7, 8, 9, 10]	Group2	7.89474	3	[BMP4, ID2, NOTCH1]
GO:0048546	digestive tract morphogenesis	GO_BiologicalProcess	0.00044	0.00083	0.00023	0.00034	[4, 5, 6, 7]	Group2	6.12245	3	[BMP4, ID2, NOTCH1]
GO:0030858	positive regulation of epithelial cell differentiation	GO_BiologicalProcess	0.00069	0.001	0.00023	0.00034	[4, 5, 6, 7]	Group2	5.26316	3	[BMP4, NOTCH1, NUMB]
GO:0060411	cardiac septum morphogenesis	GO_BiologicalProcess	0.001	0.0013	0.00023	0.00034	[3, 4, 5, 6, 7, 8, 9]	Group2	4.61538	3	[BMP4, ID2, NOTCH1]
GO:0003281	ventricular septum development	GO_BiologicalProcess	0.001	0.0013	0.00023	0.00034	[4, 5, 6, 7, 8, 9]	Group2	4.61538	3	[BMP4, ID2, NOTCH1]
GO:0055006	cardiac cell development	GO_BiologicalProcess	0.0012	0.0014	0.00023	0.00034	[4, 5, 6, 7, 8]	Group2	4.34783	3	[BMP4, NOTCH1, SLC8A1]
GO:0048663	neuron fate commitment	GO_BiologicalProcess	0.0013	0.0014	0.00023	0.00034	[5, 6, 8, 9]	Group2	4.22535	3	[BMP4, ID2, NOTCH1]
GO:0048708	astrocyte differentiation	GO_BiologicalProcess	0.0014	0.0014	0.00023	0.00034	[5, 6, 7, 8, 9]	Group2	4.10959	3	[ID2, NOTCH1, S100B]
GO:0002040	sprouting angiogenesis	GO_BiologicalProcess	0.0014	0.0014	0.00023	0.00034	[4, 5, 6, 8, 9, 10, 11]	Group2	4.10959	3	[BMP4, NOTCH1, STARD13]
GO:0055038	recycling endosome membrane	GO_CellularComponent	4.3e-05	0.00055	7.6e-05	0.00023	[4, 5, 6, 7, 8, 9, 10, 11]	Group1	6.25	4	[ARF6, B2M, VAMP8, VTI1B]
GO:0031201	SNARE complex	GO_CellularComponent	0.00066	0.001	0.00066	0.00066	[3, 4, 5, 6, 7]	Group0	5.35714	3	[VAMP5, VAMP8, VTI1B]
GO:0005484	SNAP receptor activity	GO_MolecularFunction	0.00022	0.00049	0.00066	0.00066	[3]	Group0	7.69231	3	[VAMP5, VAMP8, VTI1B]

## Sheet: 5d_LSO KEGG pathways 
Additional file 5b: KEGG pathways enriched for cis target genes of lncRNAs in linseed oil treatment
GOID	GOTerm	Ontology Source	Term PValue	Term PValue Corrected	Group PValue	Group PValue Corrected	GOLevels	GOGroups	% Associated Genes	Nr. Genes	Associated Genes Found
GO:0004130	SNARE interactions in vesicular transport	KEGG_01.03.2017	0.00023	0.00023	0.00023	0.00023	[-1]	Group0	8.82353	3	[VAMP5, VAMP8, VTI1B]
GO:0004330	Notch signaling pathway	KEGG_01.03.2017	0.00065	0.00065	0.00065	0.00065	[-1]	Group1	6.25	3	[ADAM17, NOTCH1, NUMB]
