# Supplementary material for: Transcriptome Analysis of Long Non-Coding RNA in the Bovine Mammary Gland Following Dietary Supplementation with Linseed and Safflower Oil<strong> </strong>
Source: Preprints.org preprint supplement (doi:10.20944/preprints201810.0185.v1), 2018-10-09
Supplement: Supplementary file 2 [file Supplementary File 1_LncRNA Read counts_after_DE_threshold.xlsx]

## Sheet: Novel_LncRNA_Read counts_
Additional File 1a: Identified lncRNA read counts, novel lncRNAs
lncRNA	Chromosome	Starting	Ending	Strand	7LS2	7LS63	7LS66	7LS67	7LS73	7LS74	7SF5355	7SF61	7SF62	7SF70	7SF71	7SF72	14LS2	14LS63	14LS66	14LS67	14LS73	14LS74	14SF5355	14SF61	14SF62	14SF70	14SF71	14SF72	28LS2	28LS63	28LS66	28LS67	28LS73	28LS74	28SF5355	28SF61	28SF62	28SF70	28SF71	28SF72	Total
XLOC_000015	1	1412526	1464284	+	50	38	26	42	38	33	39	38	51	31	49	40	31	53	63	55	152	37	33	30	55	35	31	30	38	43	67	27	52	40	52	56	40	23	35	26	1579
XLOC_000028	1	1496341	1498998	+	54	34	29	49	78	127	81	37	45	59	71	26	37	81	29	58	241	121	77	57	82	55	52	30	26	40	58	52	153	135	65	73	69	43	57	36	2417
XLOC_000068	1	6607080	6607467	+	3	3	2	4	7	4	0	2	5	0	0	1	0	2	2	1	2	2	1	3	4	6	0	0	1	5	2	8	8	5	0	5	5	1	0	3	97
XLOC_000096	1	17993153	17993680	+	7	5	3	6	3	0	5	1	5	3	5	2	4	1	2	3	7	1	2	1	6	5	1	1	3	2	1	4	4	6	7	1	10	2	3	5	127
XLOC_000108	1	21712557	21713448	+	7	7	1	3	4	2	8	6	4	5	5	3	2	2	5	5	3	10	3	2	7	1	12	6	6	4	2	4	0	6	3	3	4	1	12	0	158
XLOC_000109	1	21713759	21714639	+	0	4	3	6	2	0	11	4	6	0	1	1	3	4	5	1	5	3	0	4	9	4	12	4	4	4	3	10	5	5	6	3	2	1	1	9	145
XLOC_000115	1	21724289	21725044	+	2	2	2	0	4	4	2	7	2	0	6	4	3	1	7	2	5	0	1	2	6	1	1	2	4	0	3	0	1	1	5	6	2	0	1	10	99
XLOC_000150	1	26488485	26488915	+	10	11	9	8	10	9	7	9	11	10	9	9	13	12	7	11	9	12	15	8	11	8	6	12	16	15	10	19	15	8	16	12	21	6	10	15	399
XLOC_000159	1	32396227	32399330	+	24	21	20	10	25	15	20	19	12	11	24	16	19	16	21	12	23	50	21	25	34	15	14	24	19	21	28	32	19	30	31	28	27	13	45	27	811
XLOC_000164	1	32407122	32408020	+	3	4	1	6	3	3	2	1	3	2	2	5	5	3	3	5	4	9	1	5	3	2	2	11	1	9	5	8	6	11	4	3	7	1	6	5	154
XLOC_000165	1	32408404	32409138	+	13	1	6	8	3	1	1	3	2	1	1	5	2	6	5	4	3	9	6	4	9	3	5	7	3	5	10	8	2	9	4	5	8	0	7	1	170
XLOC_000167	1	32410298	32411458	+	2	8	5	6	1	9	3	6	5	8	2	2	7	2	10	3	5	14	8	6	6	3	1	9	13	13	14	6	2	9	10	6	11	3	5	7	230
XLOC_000189	1	33674219	33675119	+	3	1	2	2	1	5	5	3	3	5	6	6	4	1	4	6	1	2	13	3	4	1	1	2	6	0	0	4	2	4	10	0	4	4	5	0	123
XLOC_000194	1	33875450	33876251	+	4	2	5	2	6	3	4	5	1	5	4	9	6	3	0	2	13	1	20	3	2	1	1	0	9	0	5	2	5	3	15	8	1	2	1	0	153
XLOC_000210	1	35781212	35781812	+	3	1	4	2	5	3	2	1	2	3	2	6	7	7	3	1	5	4	6	4	2	2	4	1	8	3	6	1	8	0	3	2	6	0	2	1	120
XLOC_000241	1	38032033	38033356	+	6	10	5	5	7	3	7	4	5	3	6	4	7	6	8	5	16	7	5	2	11	6	4	2	3	6	6	6	10	5	9	7	6	3	7	6	218
XLOC_000274	1	44287407	44288976	+	11	6	7	5	7	9	12	9	8	10	12	6	11	8	12	9	17	13	14	10	13	8	7	10	19	4	14	6	15	9	20	17	14	5	12	13	382
XLOC_000303	1	46411956	46420286	+	67	62	77	82	80	70	60	71	80	68	85	71	93	81	87	83	109	74	79	74	77	60	81	73	74	60	101	102	106	81	82	101	69	54	89	65	2828
XLOC_000321	1	51298179	51298919	+	6	2	5	0	1	12	0	6	1	4	1	7	4	1	2	0	2	4	1	1	0	4	2	2	5	3	4	0	2	13	0	8	0	0	1	5	109
XLOC_000324	1	51300368	51302628	+	7	8	13	3	8	23	0	16	0	12	8	17	11	16	7	1	5	19	0	4	0	14	4	10	13	11	14	2	12	29	0	21	0	5	4	11	328
XLOC_000339	1	53979315	53980015	+	216	197	254	226	188	171	196	183	243	204	189	176	179	194	220	201	224	169	216	203	269	200	242	235	215	229	246	361	190	213	243	249	302	250	201	251	7945
XLOC_000377	1	58670922	58672676	+	0	4	0	1	4	0	0	0	5	0	1	0	4	0	0	0	2	0	0	0	25	0	6	0	0	0	0	6	1	0	0	0	21	0	4	0	84
XLOC_000400	1	61772068	61772274	+	4	7	7	5	2	6	3	7	4	2	4	5	2	7	3	1	5	4	1	6	4	4	8	5	4	5	11	13	6	4	6	5	6	9	6	5	186
XLOC_000411	1	62712193	62713494	+	3	0	0	0	6	12	3	8	7	7	1	0	6	5	0	0	1	32	4	3	10	5	1	0	2	10	0	0	5	10	0	4	4	1	1	3	154
XLOC_000446	1	67014862	67015089	+	3	3	10	3	5	15	9	3	6	6	4	4	4	2	11	3	2	9	4	3	5	3	1	4	3	3	9	1	3	9	4	7	3	1	2	2	169
XLOC_000458	1	67469022	67469767	+	2	5	6	2	3	4	5	7	5	2	3	4	6	2	5	1	5	7	6	4	7	3	1	3	6	1	4	4	6	1	8	4	0	0	1	3	136
XLOC_000473	1	67817252	67819205	+	10	12	4	5	8	14	8	8	7	5	6	0	4	9	9	4	12	8	6	4	19	8	5	11	5	10	15	7	9	9	9	7	10	2	4	2	275
XLOC_000474	1	67819616	67820769	+	6	10	4	9	9	8	10	5	12	9	6	6	5	13	11	6	16	4	11	6	14	3	8	5	11	9	12	5	11	6	8	3	7	1	5	6	280
XLOC_000476	1	67821753	67824935	+	22	20	12	17	21	29	38	21	27	20	23	17	40	38	16	33	29	33	41	25	38	22	14	29	34	15	38	27	43	28	45	25	30	11	30	22	973
XLOC_000477	1	67886566	67887062	+	5	5	3	7	4	4	2	3	7	3	2	0	7	4	2	1	3	8	0	3	2	5	2	1	2	4	8	0	3	7	2	3	1	0	4	0	117
XLOC_000480	1	67888726	67917457	+	20	21	10	17	14	8	18	9	21	10	11	2	19	10	9	13	20	14	9	10	23	9	12	13	19	19	27	13	15	18	13	22	11	3	12	11	505
XLOC_000487	1	67905679	67908808	+	17	24	9	19	22	8	24	22	28	9	12	5	27	12	12	12	12	17	8	19	16	20	15	15	18	12	38	12	9	3	25	24	9	4	14	8	560
XLOC_000488	1	67909874	67910879	+	8	15	2	6	5	4	5	3	6	2	3	0	7	3	3	5	0	4	5	3	7	3	3	0	5	4	9	5	4	2	9	6	2	0	2	3	153
XLOC_000499	1	68254047	68254892	+	4	5	3	6	2	6	3	10	4	7	2	3	3	2	4	1	3	5	2	5	6	0	0	2	5	3	10	1	1	4	4	6	8	2	2	7	141
XLOC_000513	1	68426930	68429454	+	5	0	2	1	2	2	4	6	3	6	5	0	1	2	1	5	6	7	7	3	5	3	3	1	3	1	2	3	3	1	7	6	2	1	3	5	117
XLOC_000519	1	69038632	69174625	+	69	61	64	70	69	87	44	48	77	51	62	45	81	98	69	38	79	78	51	68	135	50	67	68	65	104	103	105	77	103	56	114	121	27	62	106	2672
XLOC_000558	1	69168782	69169730	+	7	2	1	3	7	3	2	4	5	3	2	1	5	9	4	2	4	6	1	6	9	1	0	3	2	1	8	6	7	8	4	3	3	1	2	2	137
XLOC_000598	1	73563763	73565017	+	14	16	8	14	7	8	16	13	27	10	8	8	15	8	2	8	16	6	14	6	34	11	8	9	16	7	11	8	29	9	21	8	16	3	16	9	439
XLOC_000600	1	73655978	73656263	+	8	5	7	5	5	4	6	10	7	7	7	0	5	3	5	2	8	2	4	5	6	12	6	6	5	4	12	2	4	10	1	5	3	1	10	2	194
XLOC_000606	1	73868184	73868688	+	2	5	5	2	1	5	2	2	3	2	4	1	2	3	2	2	5	2	4	2	4	4	2	4	6	0	6	2	1	3	3	9	6	2	2	7	117
XLOC_000608	1	73871416	73872073	+	4	6	4	10	2	4	3	5	6	3	1	4	5	4	1	2	0	1	8	3	11	1	2	0	0	3	6	6	5	0	4	9	5	1	3	5	137
XLOC_000613	1	73979292	73982086	+	13	19	10	15	16	15	18	20	13	20	18	12	16	12	13	21	18	12	19	19	27	5	16	26	23	13	13	14	18	16	37	25	29	10	22	10	623
XLOC_000617	1	74641162	74641898	+	1	8	1	6	2	6	2	7	1	7	5	1	7	2	3	1	3	6	4	5	7	0	5	3	2	0	3	3	4	3	5	2	3	1	1	1	121
XLOC_000637	1	79787215	79790316	+	12	23	8	16	17	21	15	10	9	19	29	7	21	10	19	14	25	19	33	5	34	9	20	15	18	8	23	17	36	30	22	11	22	3	18	6	624
XLOC_000638	1	79790433	79791505	+	8	10	6	4	10	12	7	3	3	7	9	8	7	2	11	6	14	6	17	0	14	6	5	2	10	3	10	5	16	15	7	2	9	1	3	5	263
XLOC_000646	1	80663646	80664745	+	4	4	9	9	3	1	6	7	7	5	9	7	3	8	6	1	3	8	4	11	9	9	7	11	4	5	9	5	5	5	3	10	10	3	7	9	226
XLOC_000659	1	81348690	81349343	+	0	2	3	6	3	5	3	4	6	4	6	3	7	52	1	7	8	2	7	3	8	5	3	3	1	42	4	7	7	1	4	5	1	2	4	4	233
XLOC_000669	1	82525025	82525991	+	7	6	3	3	1	2	8	16	6	5	5	2	2	1	6	3	4	3	1	8	8	4	0	5	5	5	14	6	2	5	8	3	5	3	5	8	178
XLOC_000693	1	83501250	83502018	+	2	1	6	4	2	8	1	3	2	4	7	5	1	3	5	1	8	4	5	3	2	0	1	4	3	2	5	4	3	7	4	3	7	4	4	8	136
XLOC_000699	1	83626314	83626881	+	2	2	2	0	6	3	8	3	6	2	2	1	1	3	6	1	6	3	3	2	1	2	11	2	3	0	7	8	2	4	4	1	2	1	3	4	117
XLOC_000711	1	83638734	83639610	+	4	3	1	7	6	4	5	2	7	6	1	1	2	2	5	8	12	1	8	6	0	5	1	1	6	5	9	4	0	5	5	4	2	2	3	6	149
XLOC_000717	1	83927848	83930227	+	5	6	16	5	4	14	22	12	5	5	14	20	13	11	18	5	12	24	30	8	10	13	13	17	11	9	34	4	14	21	30	10	4	1	9	18	467
XLOC_000727	1	84693280	84694078	+	7	3	6	0	7	1	3	4	2	1	5	2	4	5	5	3	3	3	6	5	8	2	2	7	6	2	6	3	4	1	6	2	10	1	4	3	142
XLOC_000740	1	87936484	87939553	+	31	11	1	14	15	12	7	3	34	11	8	2	30	18	11	27	27	9	12	8	35	3	17	5	23	16	8	12	41	18	10	12	28	1	7	2	529
XLOC_000799	1	96682259	96682891	+	3	9	4	3	1	0	2	2	4	1	2	2	1	5	2	2	2	2	4	5	4	2	5	1	2	7	4	2	7	0	4	1	2	0	2	3	102
XLOC_000801	1	96684279	96685080	+	6	6	3	2	3	1	8	3	2	1	2	0	5	7	0	5	3	3	8	6	5	1	2	1	4	8	6	2	2	1	4	2	4	1	5	4	126
XLOC_000852	1	101082807	101088967	+	58	76	137	82	123	99	116	103	57	106	76	71	58	69	156	126	152	159	144	154	45	94	65	62	101	95	134	120	108	135	111	174	69	73	69	77	3654
XLOC_000853	1	101089026	101089574	+	2	3	6	8	5	5	4	2	2	1	2	0	1	4	4	4	7	5	7	4	2	2	1	3	6	5	10	2	3	7	7	9	1	2	2	3	141
XLOC_000854	1	101089961	101094799	+	62	74	63	87	103	75	117	97	37	78	58	44	54	63	58	72	111	99	133	113	87	61	58	43	71	65	95	63	79	104	138	106	53	34	51	55	2761
XLOC_000856	1	101097038	101101786	+	21	40	39	48	67	52	56	68	21	53	34	20	21	22	39	48	57	65	67	65	21	53	17	15	40	34	60	34	42	71	45	73	25	22	15	27	1497
XLOC_000857	1	101102549	101118791	+	26	12	9	25	39	19	34	29	17	40	29	6	21	13	10	21	22	25	48	32	29	30	15	16	31	15	19	13	25	22	48	33	31	4	22	12	842
XLOC_000858	1	101105702	101107029	+	6	6	9	10	11	5	16	11	9	9	16	8	4	3	8	13	10	9	12	7	11	15	9	8	13	2	4	11	7	13	16	18	9	1	13	7	339
XLOC_000859	1	101107187	101108370	+	1	7	4	5	8	3	7	2	1	6	1	2	3	0	4	2	9	6	16	5	1	3	1	1	3	4	2	0	3	4	1	9	5	2	4	1	136
XLOC_000864	1	101116515	101117232	+	2	1	2	2	10	3	3	6	3	5	7	0	1	5	3	2	1	8	9	6	2	0	2	5	4	4	3	0	5	6	6	4	2	2	0	0	124
XLOC_000867	1	101120025	101120742	+	0	3	2	3	1	3	2	7	1	9	4	2	0	0	1	4	9	1	2	7	2	4	1	0	3	5	4	2	3	11	3	9	1	1	2	1	113
XLOC_000870	1	101122949	101133663	+	15	13	26	16	72	27	20	28	16	19	13	12	21	46	35	19	56	21	27	24	27	19	12	1	35	31	44	13	46	38	21	33	27	10	8	7	898
XLOC_000877	1	101127605	101131437	+	8	9	23	24	60	29	16	26	12	16	14	8	9	34	35	20	53	33	47	26	18	15	9	8	22	15	34	14	33	35	5	36	6	6	10	2	770
XLOC_000902	1	105891800	105892329	+	1	1	0	5	0	0	18	0	0	0	0	0	5	2	0	5	0	0	4	0	0	0	0	0	6	3	1	9	0	0	6	0	0	0	0	0	66
XLOC_000946	1	112764557	112765187	+	2	1	5	3	1	4	6	5	1	3	6	1	4	1	3	3	5	5	2	0	1	6	6	3	4	1	4	2	0	4	8	6	8	4	2	2	122
XLOC_000987	1	118685147	118686434	+	6	5	10	6	8	5	4	10	9	11	7	4	7	6	12	4	8	2	10	7	8	14	5	9	4	7	17	5	4	4	8	5	5	4	5	6	251
XLOC_000990	1	118688361	118689427	+	9	6	2	3	7	2	5	3	12	11	7	6	7	7	6	4	6	3	5	7	5	8	4	11	4	10	5	3	6	9	4	4	6	9	3	8	217
XLOC_000991	1	118689710	118690085	+	2	3	5	1	2	1	4	2	3	3	6	2	2	4	3	3	1	5	3	5	5	5	2	2	2	3	4	0	4	1	5	1	1	5	3	3	106
XLOC_001002	1	119826194	119827047	+	8	4	7	2	7	3	2	7	1	2	3	12	7	15	11	2	4	1	3	5	4	1	1	6	3	6	10	7	2	6	0	9	7	0	0	3	171
XLOC_001059	1	131564675	131659228	+	313	229	168	271	296	200	231	165	276	256	221	179	247	268	244	258	610	252	269	203	284	259	196	246	289	204	317	221	378	243	330	321	259	100	206	229	9238
XLOC_001062	1	131575553	131576459	+	3	4	2	7	12	3	9	4	2	3	6	3	3	2	2	7	10	8	2	13	3	4	3	6	6	9	3	3	2	9	10	9	6	3	2	5	188
XLOC_001065	1	131663295	131664855	+	13	11	1	7	11	3	8	8	10	15	8	7	5	6	17	18	12	10	5	3	25	5	3	14	9	9	10	8	15	9	8	3	10	4	7	12	329
XLOC_001101	1	138316236	138317044	+	5	4	1	5	1	3	6	3	2	2	7	4	1	8	3	0	5	1	3	2	6	2	1	5	3	8	0	1	5	9	10	5	4	3	2	3	133
XLOC_001110	1	139947256	139948471	+	3	4	1	7	12	7	3	3	5	7	11	4	5	1	7	4	8	5	4	2	4	7	3	3	8	1	11	7	7	6	5	3	4	2	2	3	179
XLOC_001121	1	139974670	139976404	+	6	8	9	3	9	6	5	6	10	11	10	2	2	2	6	8	10	10	9	5	13	11	17	11	7	10	16	5	10	5	10	14	9	1	10	9	295
XLOC_001132	1	140361694	140362381	+	3	4	1	7	4	9	6	3	1	5	3	1	3	5	2	2	2	4	6	3	4	2	2	2	3	3	7	2	4	7	1	4	2	2	1	3	123
XLOC_001135	1	140914020	140916501	+	20	16	21	21	14	12	20	18	19	17	21	17	22	15	22	20	28	23	23	19	25	15	15	13	15	19	30	25	39	34	14	17	28	9	17	20	723
XLOC_001153	1	142220342	142221735	+	0	5	0	3	0	10	10	0	0	10	6	0	0	0	4	6	0	13	17	0	1	9	9	0	1	0	5	3	0	5	7	0	0	6	2	2	134
XLOC_001160	1	143207155	143208740	+	5	6	2	3	3	1	8	8	24	8	13	13	8	8	2	3	15	0	13	3	7	6	4	3	7	18	2	2	7	2	10	7	5	3	2	4	235
XLOC_001176	1	144140146	144140366	+	9	1	0	0	5	0	4	2	1	0	1	0	4	1	0	2	3	1	4	1	4	0	0	1	6	9	0	4	2	0	1	1	1	0	0	1	69
XLOC_001177	1	144140568	144141807	+	9	3	2	5	16	9	11	10	6	0	1	8	8	4	1	4	10	10	16	6	11	1	2	5	11	18	1	5	13	10	3	4	5	0	3	8	239
XLOC_001184	1	144177912	144178309	+	0	2	0	3	2	3	6	10	2	0	3	4	1	1	0	2	2	3	3	5	2	4	6	5	1	0	0	1	2	5	1	8	2	0	2	2	93
XLOC_001197	1	144742934	144743872	+	0	1	1	4	2	4	8	2	6	4	8	0	4	5	5	2	10	1	7	3	10	4	4	4	1	7	4	1	5	0	6	9	3	2	3	6	146
XLOC_001207	1	145184603	145202986	+	140	139	97	201	145	211	37	108	95	139	119	197	256	147	75	356	185	187	119	150	181	119	68	56	293	129	102	181	101	206	109	192	144	165	95	65	5309
XLOC_001208	1	145203689	145204876	+	2	2	5	2	2	19	2	2	4	7	5	4	11	7	1	9	9	12	5	7	4	0	2	1	18	6	1	2	1	9	2	4	4	1	3	3	178
XLOC_001214	1	145823696	145824547	+	3	5	0	3	3	3	4	3	1	2	2	0	5	3	6	5	8	13	3	5	7	12	4	2	6	0	0	1	7	4	8	3	1	1	3	1	137
XLOC_001215	1	145825021	145826164	+	6	2	3	1	5	3	4	3	7	3	3	3	5	3	9	3	16	7	5	5	4	5	5	5	3	5	5	1	15	3	5	4	3	1	2	3	165
XLOC_001216	1	145826611	145828067	+	9	5	2	2	15	9	15	2	7	3	10	1	7	6	6	7	14	6	11	4	3	13	4	8	9	2	9	1	12	14	10	6	7	3	4	2	248
XLOC_001217	1	145828594	145829057	+	6	2	1	4	5	0	5	6	0	0	3	2	5	4	3	3	7	4	4	1	3	3	2	4	4	0	3	1	6	5	9	6	7	0	6	2	126
XLOC_001233	1	146871684	146872865	+	9	13	2	2	8	12	4	4	3	2	6	1	4	2	1	10	9	7	3	1	5	0	2	7	9	5	9	2	11	6	6	3	2	2	1	4	177
XLOC_001309	1	153136318	153139450	+	33	17	33	25	21	15	28	26	21	16	10	25	31	23	28	27	19	23	27	29	43	17	23	20	19	22	33	52	25	16	29	38	48	37	44	20	963
XLOC_001310	1	153200385	153201285	+	0	4	0	2	3	3	2	2	6	6	6	2	3	6	0	9	6	0	12	6	17	9	7	2	2	3	1	2	8	1	10	1	1	3	7	6	158
XLOC_001314	1	153971348	154022508	+	870	617	538	673	617	716	815	645	698	804	646	486	845	696	630	527	835	754	726	688	885	716	724	624	820	601	987	690	825	719	891	848	751	324	625	675	25531
XLOC_001326	1	154434704	154435806	+	3	5	3	7	4	8	8	7	7	2	10	4	4	3	5	4	6	7	0	1	7	5	14	5	2	7	3	6	5	2	4	6	1	5	5	4	179
XLOC_001330	1	154668947	154669387	+	3	2	4	6	4	4	2	5	10	8	5	13	4	6	4	7	10	5	7	5	13	7	5	10	4	7	8	7	11	7	7	13	11	4	2	1	231
XLOC_001361	1	1222748	1223433	-	5	5	5	2	2	3	2	6	9	2	4	6	6	2	8	1	5	5	5	7	3	1	1	5	6	8	7	7	4	0	5	7	7	2	3	4	160
XLOC_001403	1	6117175	6118037	-	1	0	0	1	0	2	11	5	1	1	2	2	3	0	2	1	1	0	1	3	6	2	5	4	0	2	1	5	3	1	7	2	2	0	7	2	86
XLOC_001409	1	6174293	6174890	-	11	5	6	13	6	4	8	4	11	4	9	2	9	4	6	7	4	11	10	10	11	5	8	4	2	6	4	0	11	2	5	6	6	3	5	4	226
XLOC_001417	1	6520376	6521388	-	10	24	12	24	24	12	6	16	11	14	21	15	16	9	17	10	8	19	15	15	21	13	11	9	20	21	24	17	21	23	18	21	17	16	10	16	576
XLOC_001425	1	8804873	8805884	-	3	1	1	3	2	2	4	1	0	0	1	1	4	2	2	0	2	7	8	2	4	5	3	3	0	1	4	0	2	4	10	2	9	2	2	0	97
XLOC_001517	1	20658054	20658532	-	2	4	0	1	8	4	5	3	6	0	4	4	5	0	6	4	6	0	9	6	0	1	3	4	2	5	7	3	12	2	2	4	3	3	8	5	141
XLOC_001534	1	34950311	34951481	-	2	4	10	4	6	5	9	6	14	3	11	10	3	4	12	4	17	5	9	7	10	5	6	6	8	1	11	6	13	10	5	10	13	2	7	8	266
XLOC_001535	1	34951704	34952998	-	5	2	4	6	3	4	9	5	6	3	3	1	1	0	2	5	17	8	7	6	10	1	6	6	1	2	4	1	2	4	3	12	11	1	2	6	169
XLOC_001537	1	34954307	34955247	-	3	4	1	6	3	6	6	8	10	3	8	5	3	3	5	6	9	6	11	7	13	4	1	4	9	1	10	4	3	0	7	11	9	2	3	8	202
XLOC_001565	1	42950817	42951127	-	8	9	6	3	2	2	9	5	6	10	5	2	3	1	3	5	7	4	6	2	11	5	6	4	5	5	14	5	9	7	7	5	5	7	6	5	204
XLOC_001568	1	44331901	44332161	-	4	3	3	1	3	2	1	3	5	4	0	0	6	4	2	3	3	2	3	2	10	5	6	1	1	1	1	4	3	1	3	2	4	2	0	1	99
XLOC_001600	1	51723840	51724939	-	22	11	19	14	27	16	21	5	28	40	13	27	17	16	16	8	32	18	28	11	35	41	10	18	19	16	12	13	33	18	17	12	30	33	4	17	717
XLOC_001614	1	53726459	53754034	-	36	16	19	20	22	36	39	17	27	24	30	14	15	27	24	27	42	27	31	20	52	42	15	26	20	31	46	17	52	31	38	25	36	17	24	27	1012
XLOC_001659	1	59399234	59400367	-	165	147	87	118	152	137	146	168	129	172	177	61	171	144	129	146	220	159	179	112	279	143	130	119	128	145	208	109	181	172	164	199	144	34	115	113	5302
XLOC_001669	1	59750218	59751965	-	6	4	1	0	23	2	0	3	0	1	0	5	10	2	1	2	21	3	2	2	2	0	0	7	3	21	6	7	6	1	1	4	4	1	0	10	161
XLOC_001761	1	64791073	64792410	-	16	2	2	6	1	5	6	4	7	5	12	1	6	7	6	5	10	4	7	4	8	1	6	7	6	2	7	0	6	5	6	7	6	0	6	2	191
XLOC_001767	1	64798857	64800408	-	11	5	3	7	10	15	5	7	6	6	6	1	2	4	4	7	19	9	8	5	6	17	3	9	8	2	11	2	6	9	8	7	4	4	7	5	248
XLOC_001769	1	64801219	64802161	-	6	4	3	4	16	4	5	5	1	5	6	3	4	3	2	3	6	1	7	5	10	9	1	1	8	8	12	4	4	6	2	3	4	1	3	5	174
XLOC_001779	1	64996256	64997021	-	6	2	5	6	3	5	1	15	5	6	0	3	1	6	4	5	2	6	0	4	4	5	1	6	5	6	6	5	5	11	3	6	3	4	0	5	160
XLOC_001800	1	65991856	66037870	-	284	253	324	261	270	247	339	244	270	345	258	219	269	247	287	218	300	287	323	278	338	295	286	242	295	252	310	306	326	278	325	303	298	201	340	288	10206
XLOC_001807	1	67074191	67075935	-	13	9	4	15	6	4	9	5	13	9	11	15	5	6	8	5	9	10	10	5	18	7	14	7	10	9	6	3	7	12	11	4	14	2	8	7	310
XLOC_001875	1	71689799	71690523	-	3	7	3	6	2	4	1	1	4	7	1	5	3	0	5	4	1	2	4	4	2	3	6	2	1	3	5	7	0	2	4	6	1	1	9	0	119
XLOC_001876	1	71690832	71693005	-	11	13	13	8	5	9	20	16	9	14	13	4	11	13	17	5	20	12	26	10	14	14	11	6	10	19	16	11	8	9	16	15	14	6	14	3	435
XLOC_001900	1	73470022	73470845	-	41	18	26	33	20	29	52	36	45	27	33	26	49	38	25	34	62	27	50	29	56	21	34	28	26	24	40	35	27	20	42	51	35	33	44	35	1251
XLOC_001906	1	73737179	73739707	-	2	5	4	5	2	4	4	5	3	5	5	2	5	5	10	6	11	1	2	8	15	5	1	5	2	4	13	2	7	6	6	3	13	5	3	5	189
XLOC_001909	1	74380640	74504663	-	785	538	494	522	721	527	582	613	508	501	657	415	542	502	521	483	755	714	676	579	659	470	648	486	537	440	754	630	610	509	532	595	623	286	568	498	20480
XLOC_001923	1	80169821	80179076	-	245	292	137	291	278	279	184	461	351	273	534	272	184	268	189	713	676	354	365	332	364	203	286	253	163	142	198	272	390	478	175	391	277	81	201	254	10806
XLOC_001926	1	80584926	80588503	-	26	42	21	25	11	10	10	135	32	41	35	32	14	13	11	24	8	17	9	92	35	18	16	19	10	7	24	43	16	30	16	76	30	12	17	22	999
XLOC_001931	1	80591307	80591975	-	5	3	2	5	2	4	1	37	6	5	3	3	2	4	2	3	4	1	1	19	10	2	5	3	3	1	1	11	4	6	2	17	3	0	1	3	184
XLOC_001933	1	80592642	80597263	-	48	37	23	40	20	17	30	174	45	34	37	39	34	13	13	23	15	23	15	117	57	24	17	45	26	20	32	71	30	30	21	100	60	27	34	38	1429
XLOC_002005	1	84252160	84259675	-	0	0	5	4	1	12	9	1	1	4	2	2	3	5	2	1	3	11	4	2	4	4	2	0	1	3	10	3	5	10	6	3	1	3	0	3	130
XLOC_002030	1	86672520	86674882	-	26	33	15	18	19	26	31	17	21	31	23	14	32	24	7	37	20	22	25	24	27	20	18	24	29	15	30	12	42	20	25	17	28	7	20	22	821
XLOC_002033	1	87097065	87097475	-	8	6	6	12	11	7	10	11	5	5	4	3	9	8	10	4	5	3	5	14	15	18	6	11	14	6	10	5	4	7	14	21	5	2	11	11	306
XLOC_002042	1	88416276	88417065	-	1	5	6	10	7	2	6	3	5	2	3	1	4	6	4	6	6	9	3	3	12	3	10	3	1	5	8	8	5	6	8	6	3	1	5	5	181
XLOC_002059	1	91925380	91926339	-	3	2	3	3	6	10	2	4	2	2	6	7	2	8	4	6	5	4	6	1	4	2	1	6	2	3	3	2	3	2	3	7	3	0	0	3	130
XLOC_002072	1	96768274	96769544	-	5	5	1	3	8	2	11	5	2	6	9	10	10	7	10	1	8	3	4	6	14	10	5	6	10	5	4	3	18	12	13	7	4	4	7	4	242
XLOC_002085	1	98364632	98365176	-	3	6	0	1	6	3	3	5	1	3	4	0	3	6	3	1	8	4	3	4	7	2	5	4	4	2	3	2	5	6	3	4	1	1	1	2	119
XLOC_002090	1	98372885	98373637	-	4	8	1	2	4	3	2	1	4	6	6	2	6	5	5	2	8	6	4	3	5	2	4	4	2	1	5	4	5	4	3	2	2	2	1	0	128
XLOC_002107	1	107235669	107238293	-	33	18	30	26	25	29	30	31	39	33	36	19	25	33	20	41	74	22	42	27	47	19	32	23	24	45	36	17	69	33	26	26	34	26	38	26	1154
XLOC_002110	1	107767633	107768701	-	9	3	5	8	6	2	2	6	4	2	5	6	2	12	3	7	9	3	9	4	2	3	2	0	4	7	16	2	9	4	2	5	5	2	5	4	179
XLOC_002117	1	108160360	108160679	-	0	1	4	6	2	2	1	0	3	3	3	1	8	1	2	1	0	1	1	0	11	1	2	6	1	3	3	7	3	4	6	2	12	5	3	4	113
XLOC_002124	1	109759941	109761129	-	7	6	7	14	7	13	8	13	7	4	10	8	7	6	10	9	18	12	8	8	11	3	15	9	4	8	8	8	19	15	9	8	14	3	9	9	334
XLOC_002126	1	109816773	109817609	-	3	1	0	3	9	1	4	2	1	3	5	2	3	7	2	5	8	4	6	11	8	8	3	7	3	1	3	5	9	3	0	4	1	3	2	2	142
XLOC_002141	1	111301497	111302210	-	3	3	1	4	3	5	3	4	4	6	8	18	8	4	5	0	2	4	1	3	3	6	4	6	4	0	3	6	4	5	3	4	0	2	2	4	145
XLOC_002142	1	111302807	111303110	-	1	6	4	1	5	4	3	3	3	1	1	5	6	0	0	4	5	3	1	0	5	3	2	4	2	0	3	1	0	1	1	3	3	0	3	1	88
XLOC_002143	1	111303174	111305270	-	19	7	12	10	17	11	9	24	10	13	21	11	31	17	14	11	19	8	21	12	13	8	10	15	11	19	28	10	12	14	18	22	13	9	23	35	557
XLOC_002144	1	111305386	111306481	-	9	5	4	4	3	8	3	19	3	5	3	7	9	10	5	9	7	7	8	10	7	7	4	6	7	6	7	5	9	3	5	7	3	2	8	6	230
XLOC_002145	1	111306626	111307672	-	4	4	5	7	7	6	5	5	2	6	8	4	5	3	4	10	1	3	5	6	8	5	6	9	3	9	12	3	2	6	6	16	2	4	5	9	205
XLOC_002147	1	111308658	111310200	-	13	7	4	6	5	12	8	15	9	10	14	11	10	13	10	13	19	13	9	14	10	6	6	10	16	13	18	6	10	20	9	18	8	3	8	22	398
XLOC_002149	1	111310945	111311820	-	5	3	3	5	6	8	3	5	2	4	2	5	3	2	2	3	5	1	3	3	6	4	3	3	8	6	13	1	2	4	2	4	1	1	3	7	141
XLOC_002150	1	111312149	111313521	-	8	5	7	11	17	5	7	7	2	5	7	7	2	11	6	5	12	7	13	11	8	9	4	6	11	7	14	5	7	7	10	11	6	4	6	11	281
XLOC_002151	1	111314080	111314700	-	2	2	2	3	5	6	4	1	0	3	4	1	4	4	3	4	5	4	5	3	2	8	1	4	3	5	6	8	6	3	6	6	3	3	0	7	136
XLOC_002154	1	111317544	111318144	-	5	7	2	5	8	1	4	2	1	0	5	5	4	5	1	1	5	7	6	5	4	5	5	4	5	1	5	3	5	1	2	3	2	3	1	7	135
XLOC_002165	1	112712710	112713236	-	4	6	3	5	3	0	4	4	2	9	3	4	7	1	4	3	4	4	1	4	2	4	4	4	4	5	3	11	3	3	2	3	4	2	3	3	135
XLOC_002167	1	112714088	112715173	-	8	13	9	8	2	6	9	6	5	11	9	2	5	4	4	7	4	6	4	2	8	9	6	6	7	5	12	3	5	4	16	6	7	2	8	4	232
XLOC_002174	1	112729123	112729786	-	3	6	5	7	4	0	6	9	2	5	3	4	2	2	3	3	3	5	5	3	2	7	3	6	3	4	12	10	3	3	6	13	3	2	2	4	163
XLOC_002199	1	116235249	116457665	-	829	653	626	649	861	760	1002	793	773	680	727	578	783	936	707	697	1478	720	1236	637	1093	847	682	639	833	854	1054	614	1544	850	980	867	927	461	787	745	29902
XLOC_002224	1	119149230	119150685	-	19	13	9	15	12	12	29	18	16	10	11	4	22	17	9	16	26	14	27	9	29	11	11	5	18	11	16	14	29	13	24	17	26	6	9	4	551
XLOC_002256	1	127746962	127749139	-	9	16	12	20	6	17	15	17	13	16	9	7	8	20	12	11	19	16	13	10	12	12	12	6	14	11	6	15	17	29	9	17	12	10	10	6	464
XLOC_002263	1	128556416	128570794	-	5	2	1	4	7	1	8	4	3	4	5	9	7	6	3	2	7	0	5	3	6	4	5	4	8	5	1	7	5	8	6	5	6	10	3	6	175
XLOC_002265	1	128582785	128583612	-	2	7	6	7	7	5	10	10	5	6	11	2	9	14	8	7	11	14	11	11	10	9	8	7	11	5	7	3	10	7	11	9	6	2	9	6	283
XLOC_002266	1	128583690	128584343	-	5	4	4	8	11	9	9	8	3	3	10	3	14	1	4	11	9	9	9	2	8	7	4	3	13	3	5	2	13	8	5	6	5	4	6	3	231
XLOC_002274	1	130644111	130644788	-	1	2	2	8	3	2	2	1	1	3	4	0	5	1	2	0	2	11	4	1	4	0	7	1	6	5	5	7	1	5	2	3	2	2	5	1	111
XLOC_002284	1	131534052	131534970	-	7	7	9	6	17	12	14	12	14	7	14	14	9	10	10	11	11	11	20	13	13	12	7	8	4	7	7	7	17	5	14	21	13	8	7	7	385
XLOC_002305	1	134029745	134030541	-	2	8	8	2	3	2	4	3	8	2	3	1	8	7	6	4	4	5	9	3	5	5	2	1	4	4	8	4	10	5	7	5	10	4	2	2	170
XLOC_002334	1	137993380	137993779	-	12	5	5	8	11	7	8	13	9	10	6	2	6	9	8	6	11	3	7	7	14	16	11	11	7	8	13	4	3	6	4	10	6	10	10	4	290
XLOC_002343	1	140362880	140364230	-	9	14	8	9	11	3	11	10	4	2	5	6	10	5	6	8	14	6	7	6	11	9	7	8	5	12	11	11	7	14	9	9	10	2	5	11	295
XLOC_002344	1	140364518	140365550	-	9	6	0	4	10	0	6	6	3	3	3	4	7	3	5	5	4	3	2	3	4	5	4	8	5	3	5	5	6	1	4	5	3	3	4	3	154
XLOC_002349	1	140720397	140721217	-	5	2	5	4	1	2	11	8	3	1	7	1	3	1	2	0	5	2	5	3	9	1	3	3	3	3	3	0	4	3	7	2	5	0	2	5	124
XLOC_002367	1	143204787	143205775	-	3	2	0	8	4	0	3	3	5	3	11	0	6	7	1	2	17	2	3	4	4	3	1	1	4	2	2	3	4	0	3	3	2	1	3	4	124
XLOC_002389	1	144649899	144654228	-	30	31	39	28	31	20	62	34	35	21	28	13	34	40	46	22	42	20	33	24	48	41	43	37	29	33	44	36	32	34	39	35	31	14	37	37	1203
XLOC_002396	1	145018494	145029035	-	59	33	39	42	48	52	55	40	51	46	53	35	56	50	44	40	43	39	37	40	86	36	44	37	54	41	66	68	48	43	49	63	48	55	60	44	1744
XLOC_002455	1	147998139	148001979	-	31	39	36	39	48	8	32	40	19	35	52	19	31	31	41	27	45	8	42	39	21	17	31	24	32	21	48	29	37	10	52	33	26	19	27	29	1118
XLOC_002457	1	148004803	148005928	-	25	13	32	18	35	21	37	25	17	28	19	14	36	27	27	23	36	10	37	31	29	29	14	22	27	21	30	17	23	12	30	22	27	11	21	24	870
XLOC_002473	1	149195049	149195799	-	2	4	0	5	9	1	2	7	1	6	6	3	2	3	0	0	8	0	5	0	12	1	1	7	2	11	8	8	8	5	6	13	8	2	5	10	171
XLOC_002476	1	149199204	149202476	-	11	13	5	10	17	7	24	9	13	29	10	7	7	17	7	5	16	13	7	4	37	13	3	12	8	35	21	22	18	18	18	61	31	7	12	31	578
XLOC_002485	1	150304452	150307251	-	13	15	22	15	15	14	21	25	20	15	21	23	21	26	28	21	50	21	34	18	26	11	25	22	18	23	23	33	40	16	25	19	33	18	30	18	818
XLOC_002490	1	150995963	150997735	-	8	8	3	9	1	3	19	8	7	9	5	4	5	8	10	8	7	4	19	6	10	2	4	4	4	7	14	10	11	3	9	0	10	4	5	3	251
XLOC_002497	1	151255049	151255777	-	2	1	1	1	3	5	11	0	4	4	3	3	8	4	4	8	5	5	4	5	0	13	1	3	7	1	9	5	4	3	6	5	5	1	4	3	151
XLOC_002499	1	151257577	151258573	-	4	3	5	1	3	5	2	1	8	5	4	0	8	0	3	4	2	6	8	4	4	6	1	0	5	2	8	4	4	4	4	3	7	0	0	3	131
XLOC_002503	1	151450506	151451126	-	4	3	7	6	3	5	5	2	0	0	3	5	5	3	4	8	4	4	7	6	6	2	0	4	7	4	8	4	6	8	8	8	4	7	0	8	168
XLOC_002519	1	153074937	153077023	-	1	6	0	7	1	3	12	2	15	19	27	11	1	19	1	16	7	1	10	1	13	13	10	10	1	8	2	5	1	1	11	4	6	5	7	2	259
XLOC_002521	1	153077734	153079013	-	0	2	0	1	0	3	4	0	9	8	10	5	0	10	1	6	5	2	3	1	7	14	6	1	1	3	0	1	2	0	5	1	3	2	4	1	121
XLOC_002528	1	153096857	153099130	-	2	13	1	11	5	8	12	4	7	17	23	31	5	22	0	50	7	1	27	1	17	25	9	5	6	11	3	9	4	0	11	1	15	5	19	4	391
XLOC_002531	1	153100980	153102060	-	0	4	0	3	2	6	6	2	3	9	11	14	0	10	0	12	2	1	8	1	7	14	4	2	2	4	0	4	2	0	4	8	9	3	9	1	167
XLOC_002532	1	153102159	153103980	-	1	8	0	2	2	7	11	5	7	12	14	13	3	15	0	28	5	2	17	2	12	8	13	4	2	6	0	2	0	0	6	2	15	3	12	6	245
XLOC_002540	1	153115295	153116604	-	3	3	0	1	4	2	6	1	2	5	20	14	5	7	0	16	5	2	10	0	11	2	3	5	3	6	0	1	2	0	12	1	4	2	6	6	170
XLOC_002548	1	153131595	153132246	-	0	3	0	1	0	6	0	1	0	1	7	2	3	0	0	8	4	2	7	1	8	5	0	1	0	2	1	0	2	0	8	1	4	1	5	0	84
XLOC_002553	1	153145804	153148139	-	5	5	1	13	5	7	11	5	9	13	12	19	8	11	3	30	15	10	19	6	14	19	10	7	9	9	1	10	10	5	16	12	10	9	19	6	373
XLOC_002555	1	153149175	153164789	-	74	35	11	45	102	111	55	44	92	61	172	115	96	58	27	198	181	129	199	69	70	110	130	57	103	30	20	42	134	52	81	77	58	42	233	49	3162
XLOC_002562	1	153820042	153820996	-	6	1	0	5	3	6	1	4	2	4	13	3	4	6	3	8	8	6	10	4	2	0	3	4	4	2	2	5	3	5	4	6	1	2	0	2	142
XLOC_002568	1	153860742	153955586	-	82	67	59	61	117	120	158	91	87	73	76	52	122	47	66	93	92	136	129	110	45	67	90	63	119	50	85	44	68	81	116	70	35	33	43	40	2887
XLOC_002573	1	153917004	153918952	-	14	15	7	7	13	7	20	9	7	6	10	9	16	10	8	19	12	16	30	11	10	8	8	9	11	14	8	11	8	3	12	5	6	2	5	6	372
XLOC_002582	1	153969061	153971285	-	68	34	28	22	64	111	47	42	49	25	124	25	68	31	32	55	38	70	64	23	24	38	70	17	92	35	43	33	45	69	31	36	20	24	64	14	1675
XLOC_002587	1	154130490	154139915	-	105	1	0	0	2	3	4	0	0	0	2	63	110	0	0	2	0	1	1	0	0	0	0	26	93	0	1	0	1	3	0	0	0	3	0	28	449
XLOC_002594	1	154157675	154158846	-	5	8	4	12	5	2	12	5	5	7	5	0	9	9	7	7	8	6	7	8	14	4	6	7	9	6	13	4	20	5	11	4	6	5	3	6	254
XLOC_002641	10	535912	536478	+	5	3	1	2	4	4	6	8	2	3	2	4	2	4	0	0	3	6	1	5	6	6	1	3	9	6	2	0	6	7	2	6	2	2	2	2	127
XLOC_002642	10	536576	537467	+	6	5	4	6	6	5	6	7	4	5	4	6	7	7	2	4	9	1	1	11	9	8	0	12	10	7	6	7	7	7	11	15	4	3	4	3	219
XLOC_002661	10	572586	572936	+	1	3	2	0	1	2	1	3	4	3	1	2	1	0	2	0	2	2	0	3	8	2	1	6	3	2	4	5	0	1	1	8	6	2	2	2	86
XLOC_002668	10	1251101	1251957	+	4	4	2	4	5	5	8	7	11	5	9	2	6	8	4	3	2	7	8	5	8	8	6	3	5	4	4	7	8	11	4	4	7	3	7	5	203
XLOC_002709	10	7542356	7868250	+	2562	1853	2285	1901	2244	2507	2419	2134	1692	2203	2365	1926	2060	2138	2203	1598	3423	2913	2543	1858	2472	1893	2229	1821	1914	1646	3020	1941	2504	2593	1904	2300	1953	1032	1908	1864	77821
XLOC_002753	10	12161022	12161692	+	3	7	5	0	5	2	1	3	3	6	6	4	10	3	1	6	3	4	1	0	12	8	7	5	7	2	10	3	0	0	3	4	1	2	3	4	144
XLOC_002796	10	15042382	15043548	+	10	10	9	8	10	10	8	5	9	7	7	14	9	10	8	9	7	10	9	4	11	14	5	11	12	8	18	5	9	5	11	9	14	5	17	11	338
XLOC_002804	10	15626214	15636424	+	252	173	131	143	180	189	238	205	191	184	251	144	228	227	148	238	319	191	225	181	267	170	167	158	194	222	200	157	303	244	227	263	231	110	200	154	7305
XLOC_002880	10	20789701	20790759	+	4	1	1	6	1	2	6	5	1	2	2	1	3	0	3	6	7	4	4	2	3	1	3	3	5	4	9	1	2	7	0	3	1	1	5	5	114
XLOC_002882	10	20837947	20838488	+	11	5	1	5	6	5	10	10	5	7	11	5	3	5	5	7	19	3	9	8	8	7	6	8	8	13	11	7	16	5	11	12	5	8	4	5	274
XLOC_002886	10	20849743	20851433	+	11	12	5	4	8	5	19	12	5	12	14	4	6	5	6	11	14	11	21	6	5	9	10	7	13	4	12	7	19	8	19	5	6	3	5	8	331
XLOC_002887	10	20851934	20852446	+	2	6	8	2	7	8	8	2	5	3	6	3	3	5	4	2	8	5	9	4	3	1	10	3	6	1	3	8	6	8	9	4	6	1	6	3	178
XLOC_002888	10	20853129	20853695	+	3	4	5	4	6	7	4	5	5	5	4	3	6	3	1	4	8	1	6	1	4	3	8	1	1	2	7	3	8	6	11	8	7	2	2	3	161
XLOC_002889	10	20863274	20865892	+	26	19	12	32	19	19	44	13	24	20	34	14	33	30	16	23	40	25	26	19	24	16	20	15	22	26	29	5	37	15	31	25	32	9	30	22	846
XLOC_002900	10	20939692	20941372	+	6	14	8	3	8	10	9	7	4	6	7	15	8	12	3	10	9	10	18	4	14	2	5	7	15	14	7	9	14	12	5	12	12	5	4	12	320
XLOC_002915	10	21443716	21445755	+	19	18	15	15	19	15	18	13	17	22	19	7	18	12	13	9	20	9	16	19	46	21	13	12	23	33	23	21	33	22	42	24	24	13	16	27	706
XLOC_002917	10	21457100	21466011	+	372	382	317	349	281	222	327	307	294	358	372	259	393	323	313	338	543	278	344	305	512	373	333	298	340	291	435	375	408	370	495	392	400	236	398	347	12680
XLOC_002928	10	21714295	21715323	+	7	8	9	3	6	3	6	1	9	2	4	2	7	0	10	5	6	1	12	6	11	1	10	3	8	1	13	6	9	3	5	8	4	1	10	3	203
XLOC_002929	10	21715647	21716293	+	1	6	2	7	2	1	10	2	7	1	4	0	3	4	2	4	8	3	3	1	9	0	7	4	3	1	10	5	7	4	4	2	2	1	3	1	134
XLOC_002938	10	21793380	21794774	+	16	15	3	12	13	11	8	8	8	8	11	8	11	8	9	10	17	20	16	11	14	16	13	12	15	15	13	5	30	9	23	13	10	7	7	3	428
XLOC_002939	10	21794828	21796076	+	7	7	8	9	14	11	13	5	9	10	10	15	10	12	11	7	16	11	23	4	15	5	13	7	6	9	22	12	18	10	14	11	14	6	7	13	394
XLOC_002979	10	26106290	26107880	+	3	0	2	0	1	2	10	1	3	1	5	1	6	5	5	1	1	0	10	3	9	5	4	2	6	4	3	9	5	2	1	5	4	3	2	3	127
XLOC_002990	10	26484761	26485650	+	14	2	15	9	8	15	13	6	8	6	17	11	12	12	9	5	21	10	11	7	11	6	8	17	7	14	8	26	12	19	14	12	16	10	11	7	409
XLOC_003046	10	28516667	28519238	+	20	11	10	24	18	21	21	17	15	12	20	12	19	10	22	15	20	19	19	18	20	14	17	10	23	21	16	15	31	14	34	18	18	7	16	17	634
XLOC_003051	10	28523991	28524847	+	3	3	3	2	10	1	5	11	5	6	5	3	4	2	1	5	4	3	7	2	7	3	1	2	7	9	10	5	5	3	4	6	12	3	7	2	171
XLOC_003056	10	28531441	28533479	+	5	6	3	12	18	12	7	10	7	8	10	6	5	12	9	6	12	15	6	5	16	13	8	5	17	9	6	8	14	12	12	3	3	1	13	13	327
XLOC_003057	10	28533640	28534485	+	6	4	1	5	3	5	3	5	3	6	9	4	6	5	3	3	4	3	5	3	5	8	5	4	4	4	0	2	8	8	3	5	7	0	4	4	157
XLOC_003058	10	28534546	28535496	+	6	7	4	6	8	5	3	7	3	4	5	7	3	8	1	4	6	3	5	7	6	0	8	5	6	0	10	3	5	10	6	6	6	2	5	10	190
XLOC_003072	10	29966888	29970460	+	25	8	14	8	11	21	35	13	9	8	13	13	20	18	19	8	20	21	45	9	38	16	13	14	18	20	35	17	41	27	44	24	38	5	17	9	714
XLOC_003074	10	30160699	30161749	+	6	5	0	8	4	3	2	7	5	3	3	1	4	5	5	2	5	3	7	6	5	10	2	4	5	3	8	0	3	2	5	6	6	0	6	1	150
XLOC_003082	10	30531374	30671127	+	25	42	27	47	69	12	40	27	47	34	38	21	26	18	23	31	40	22	36	20	82	18	33	26	23	23	30	60	34	10	41	26	57	29	24	32	1193
XLOC_003112	10	36107011	36107619	+	1	0	3	3	0	4	0	5	0	1	2	3	0	1	0	1	1	0	4	2	2	7	2	0	0	2	0	12	0	0	5	10	9	3	1	1	85
XLOC_003134	10	36877932	36894278	+	2033	1743	1978	1852	1783	2089	2095	1604	2065	1949	1913	1227	1738	2066	1828	1540	2783	1900	2311	1771	2384	1842	1662	1683	1950	1930	2810	1993	2297	1970	2029	2055	2088	1029	1845	1798	69633
XLOC_003178	10	42700808	42701228	+	61	49	50	62	36	36	60	48	44	46	44	43	45	31	55	31	53	30	37	48	32	40	54	54	61	29	54	70	33	39	40	49	33	49	39	45	1630
XLOC_003181	10	42706446	42708056	+	10	14	17	19	16	16	24	18	14	10	26	5	16	12	10	4	19	15	13	16	16	14	15	9	10	12	21	11	20	23	17	17	11	11	9	13	523
XLOC_003182	10	42712911	42717985	+	185	124	91	118	134	159	249	157	111	141	159	104	150	144	102	91	177	148	206	137	212	126	119	107	188	139	158	108	149	174	180	194	146	63	145	149	5244
XLOC_003189	10	42999231	43000051	+	1	6	1	7	6	1	5	2	2	3	3	1	4	4	5	1	5	2	5	0	8	1	1	3	3	8	5	8	13	7	2	1	4	0	0	3	131
XLOC_003191	10	43014536	43032318	+	8	6	3	4	2	7	7	1	1	1	1	2	4	6	4	1	1	8	4	4	13	1	9	6	3	7	5	7	7	12	8	1	6	1	8	7	176
XLOC_003194	10	43032957	43037898	+	41	25	15	20	25	23	42	18	28	12	19	22	15	46	28	29	15	42	36	8	95	12	32	35	9	26	37	42	44	24	43	29	87	6	31	37	1098
XLOC_003209	10	43841494	43842250	+	1	2	4	4	6	9	3	3	3	1	8	7	2	7	5	5	4	10	4	4	6	1	2	3	5	5	8	5	6	4	3	5	7	4	3	4	163
XLOC_003236	10	45873106	45874613	+	13	18	12	11	8	12	8	15	11	12	3	7	9	8	21	5	9	16	23	12	16	8	6	2	10	9	23	14	10	12	7	10	11	8	17	6	402
XLOC_003242	10	46749740	46771393	+	43	42	78	35	99	15	40	43	47	27	29	19	50	69	93	10	42	20	37	29	102	50	40	22	52	86	90	29	118	13	40	32	52	33	37	21	1684
XLOC_003246	10	47040403	47048100	+	0	0	0	1	1	1	0	1	2	0	1	1	0	10	3	5	16	0	1	2	1	1	0	2	1	0	0	0	8	4	1	0	0	0	1	0	64
XLOC_003261	10	48376779	48849533	+	436	334	341	327	454	395	511	404	486	371	542	427	613	338	364	330	296	398	416	373	721	255	452	422	558	464	420	441	290	468	565	500	651	287	512	478	15640
XLOC_003262	10	48562366	48562852	+	4	4	4	5	7	2	3	7	2	6	5	1	10	2	1	6	7	6	5	2	6	6	4	6	4	4	6	1	1	4	3	1	6	0	4	8	153
XLOC_003264	10	48564427	48565296	+	10	2	5	5	12	3	11	7	4	6	6	2	6	11	8	3	4	12	4	13	11	8	12	3	3	16	5	2	5	9	12	8	11	1	12	8	260
XLOC_003268	10	48568896	48569203	+	5	3	2	3	11	5	3	1	5	1	4	5	2	0	5	4	0	3	0	2	8	2	1	3	4	6	3	4	3	5	5	3	5	0	4	4	124
XLOC_003272	10	48600504	48600858	+	5	6	0	2	7	3	2	2	4	2	1	1	5	2	6	2	4	1	2	3	3	4	0	1	4	5	3	3	3	4	3	2	1	3	0	1	100
XLOC_003273	10	48602171	48602464	+	2	7	2	2	5	0	0	3	1	1	1	1	10	1	2	2	4	7	1	4	2	2	3	1	3	7	5	0	4	4	1	8	1	1	5	0	103
XLOC_003275	10	48603381	48605207	+	24	21	9	12	24	12	26	16	13	15	17	14	30	13	12	14	9	10	6	19	23	4	12	12	21	21	23	18	15	15	25	15	9	3	10	22	564
XLOC_003277	10	48649018	48649754	+	2	8	3	3	7	1	1	5	3	2	4	6	5	0	3	1	2	7	0	1	10	2	3	6	4	8	0	6	0	5	5	6	4	2	4	7	136
XLOC_003288	10	48670379	48670841	+	1	3	1	3	1	6	2	2	1	0	1	1	5	2	2	1	2	4	3	3	1	3	1	2	7	5	0	2	2	6	1	3	1	0	2	2	82
XLOC_003289	10	48671032	48672089	+	3	3	2	5	8	4	1	3	1	5	5	2	3	6	4	5	6	5	6	3	6	1	4	3	4	10	7	9	2	5	3	7	2	4	5	1	153
XLOC_003290	10	48672148	48674721	+	13	13	7	19	11	32	16	25	13	16	26	4	13	16	13	16	11	31	20	19	22	8	11	16	26	15	23	13	16	31	14	23	18	6	18	9	603
XLOC_003307	10	48833736	48834301	+	2	8	0	4	8	7	4	3	1	1	5	1	3	4	1	4	2	5	3	4	4	0	6	0	8	3	2	0	3	2	5	7	4	1	7	3	125
XLOC_003308	10	48834486	48836032	+	10	15	7	18	7	5	11	15	9	15	17	9	17	10	1	7	5	10	15	11	14	15	12	10	19	4	9	11	12	8	9	13	11	4	8	7	380
XLOC_003311	10	48856121	48856610	+	5	2	0	7	5	3	3	2	3	6	1	1	4	1	0	6	4	2	4	4	7	6	0	3	7	5	2	3	7	6	6	6	2	0	4	2	129
XLOC_003312	10	48856702	48859063	+	12	20	9	10	31	8	12	7	3	15	9	3	21	7	7	14	13	7	20	10	16	4	5	7	21	29	15	28	10	10	21	15	11	11	15	16	472
XLOC_003314	10	48859877	48860568	+	2	7	4	4	5	0	3	2	2	2	1	3	3	1	3	0	5	2	6	4	8	3	2	2	2	10	2	6	1	0	4	1	0	4	5	2	111
XLOC_003325	10	48878067	48879361	+	2	4	4	2	13	0	9	7	3	4	3	4	9	1	3	1	9	2	4	5	10	4	3	7	7	14	9	9	2	5	6	9	3	0	8	1	186
XLOC_003330	10	48892526	48893555	+	5	8	8	9	3	2	8	8	3	3	3	2	6	0	2	2	7	3	5	3	2	10	1	5	5	11	6	8	2	4	9	5	2	2	3	6	171
XLOC_003333	10	48895360	48895963	+	1	2	5	2	9	3	5	2	0	2	3	1	5	1	3	1	3	6	5	1	3	1	0	3	3	4	1	6	1	5	5	6	3	3	1	2	107
XLOC_003338	10	48911191	48912025	+	1	5	5	3	6	3	2	2	2	4	1	0	3	1	0	3	9	2	3	4	1	1	1	2	3	8	9	3	1	2	7	3	2	1	3	2	108
XLOC_003345	10	48925483	48926305	+	2	7	2	2	5	3	1	2	2	2	8	0	9	2	1	5	1	1	1	5	2	9	1	2	3	9	4	4	1	2	4	1	3	2	9	3	120
XLOC_003355	10	49840910	49842144	+	16	26	8	16	19	20	16	17	6	13	28	2	5	3	6	12	11	15	29	14	13	12	18	18	6	7	15	3	12	15	8	14	8	3	14	16	464
XLOC_003356	10	49843486	49844581	+	10	7	2	8	8	14	3	15	4	8	14	4	7	7	4	7	9	15	15	20	9	12	9	13	14	3	8	0	15	15	6	9	11	0	3	9	317
XLOC_003357	10	49846269	49846503	+	2	5	0	8	6	4	7	6	6	2	12	3	1	2	1	1	9	8	11	6	11	5	7	6	3	7	6	6	4	5	2	5	4	1	6	3	181
XLOC_003363	10	51454461	51459993	+	113	89	47	97	83	91	100	66	89	103	98	50	84	78	103	82	100	115	107	69	160	84	91	90	73	71	105	57	95	108	105	75	100	37	82	89	3186
XLOC_003369	10	52655734	52667480	+	8	2	3	7	3	8	5	6	5	1	3	0	1	2	8	5	6	2	6	2	5	8	1	1	0	5	7	4	7	4	7	6	2	3	1	1	145
XLOC_003370	10	52669356	52689219	+	11	6	1	7	7	8	4	6	2	6	6	4	8	3	5	5	5	7	4	6	5	4	1	3	4	2	7	3	4	3	4	8	4	2	6	4	175
XLOC_003371	10	52689741	52693227	+	29	22	19	18	19	29	18	20	15	20	17	19	16	13	11	19	28	17	24	14	25	23	13	5	14	25	16	21	18	16	25	17	32	9	11	15	672
XLOC_003372	10	53481760	53482972	+	8	5	5	7	7	12	15	12	1	9	6	5	8	11	4	6	11	14	16	7	8	8	3	1	8	4	7	1	7	10	8	13	10	1	2	2	262
XLOC_003377	10	53487282	53488338	+	4	3	3	6	5	10	6	8	1	10	6	0	8	2	5	9	12	7	11	6	9	4	1	2	4	7	0	2	8	11	4	10	11	7	7	6	215
XLOC_003398	10	55058787	55059342	+	8	4	0	3	5	2	3	2	4	3	0	1	3	4	0	3	6	1	3	5	1	2	0	3	6	2	8	0	5	4	2	7	0	0	7	0	107
XLOC_003402	10	55182179	55183490	+	6	3	11	5	9	10	10	3	4	4	6	2	6	8	16	7	10	9	7	5	7	4	1	2	8	12	7	3	4	11	1	8	3	0	1	5	218
XLOC_003405	10	55185439	55186297	+	15	4	7	3	5	4	5	6	6	8	1	0	6	2	5	5	11	6	10	8	3	11	2	4	6	11	11	4	7	8	3	8	2	2	3	11	213
XLOC_003462	10	61335393	61336279	+	3	7	4	4	3	5	7	1	4	5	6	2	6	8	5	1	8	5	3	4	6	10	7	2	2	4	9	5	6	12	6	7	4	0	8	2	181
XLOC_003463	10	61336436	61337015	+	3	1	4	0	3	3	7	2	3	4	7	3	2	2	5	5	6	4	1	5	3	2	4	1	5	5	6	1	0	0	5	2	3	3	4	8	122
XLOC_003487	10	65211531	65213296	+	4	6	1	1	0	23	1	0	3	3	3	0	4	7	3	4	1	4	2	1	1	2	0	2	6	3	1	0	0	9	3	0	2	0	3	1	104
XLOC_003490	10	65215184	65216465	+	10	7	2	7	1	22	0	1	1	4	5	8	9	6	1	1	0	7	1	1	1	1	3	2	3	2	1	3	0	7	2	1	1	2	2	9	134
XLOC_003515	10	67771983	67772885	+	2	3	1	2	7	6	4	2	3	1	6	1	3	4	2	3	4	3	4	3	7	6	0	4	4	4	4	3	8	6	1	3	5	1	5	2	127
XLOC_003516	10	67773112	67773990	+	7	9	1	5	10	6	7	2	5	3	3	2	4	7	0	2	6	5	4	5	3	4	4	5	3	7	6	3	7	5	2	8	4	1	1	2	158
XLOC_003518	10	67776704	67779961	+	29	17	16	24	25	42	25	30	25	19	27	13	18	20	16	18	30	19	30	12	40	12	25	21	30	25	27	14	42	22	24	26	28	11	17	24	843
XLOC_003533	10	69325556	69326799	+	4	4	2	3	3	9	2	8	5	6	12	5	10	4	3	0	3	9	7	1	5	4	4	6	6	6	9	3	6	4	13	6	5	4	3	7	191
XLOC_003546	10	70903326	70905168	+	5	8	5	7	5	10	11	9	10	11	13	8	5	7	13	7	10	3	16	5	20	10	13	6	7	9	14	4	12	4	10	8	8	5	6	3	307
XLOC_003564	10	72615477	72616738	+	7	7	1	10	5	7	5	3	4	5	3	2	3	4	4	7	5	4	11	2	11	4	3	4	6	3	5	2	5	1	11	5	11	0	4	3	177
XLOC_003565	10	72616882	72617879	+	3	4	1	3	4	2	1	4	0	8	8	3	5	6	5	4	3	6	10	3	8	2	7	2	3	6	4	2	10	5	2	5	5	1	1	3	149
XLOC_003572	10	73081302	73081894	+	2	1	2	1	2	1	4	3	7	2	1	5	6	3	1	1	1	4	3	2	2	7	2	1	3	2	9	1	8	4	4	7	5	7	4	6	124
XLOC_003579	10	73653103	73653749	+	4	4	2	1	0	1	3	5	4	3	5	0	5	2	0	3	1	6	2	3	9	3	5	5	4	0	8	4	4	5	5	8	5	0	4	2	125
XLOC_003580	10	73653926	73654365	+	7	1	2	5	3	1	3	3	0	0	3	3	7	3	4	1	3	6	1	6	3	0	1	6	4	2	2	0	4	2	4	6	4	1	0	0	101
XLOC_003613	10	77831035	78165263	+	87	57	61	82	98	82	80	62	50	63	59	56	76	98	76	63	145	82	116	84	108	69	59	61	78	68	118	58	101	66	75	93	87	58	80	72	2828
XLOC_003615	10	78815208	78815561	+	2	1	0	1	1	0	1	0	3	2	3	0	6	2	0	9	10	0	1	1	1	1	2	0	9	3	0	0	0	0	0	5	1	1	3	0	69
XLOC_003617	10	78898768	78904231	+	1	1	1	0	0	0	0	80	1	2	204	0	2	0	1	0	0	0	1	79	1	0	93	0	1	0	1	1	1	0	1	120	1	0	111	0	704
XLOC_003641	10	80974708	80975918	+	5	3	3	3	7	9	6	5	4	10	3	6	7	8	4	5	7	6	10	8	11	5	6	1	5	3	6	4	5	6	10	6	5	1	3	3	199
XLOC_003643	10	80976703	80978039	+	7	9	2	5	2	6	13	4	4	10	5	1	7	9	3	15	7	10	6	4	8	10	4	5	8	9	8	3	10	6	11	11	9	3	5	7	246
XLOC_003646	10	80981905	80982862	+	6	5	3	5	1	1	5	4	7	5	4	1	0	5	2	0	10	2	3	2	4	0	5	2	2	1	2	2	2	3	5	4	6	1	4	3	117
XLOC_003650	10	80984997	80987281	+	11	9	6	12	17	12	24	10	16	18	28	4	12	4	7	14	24	10	18	9	13	6	9	11	9	14	16	14	12	13	16	14	14	2	10	8	446
XLOC_003652	10	80987960	80988666	+	1	4	3	4	0	3	4	3	4	4	2	3	2	3	2	4	10	7	7	1	10	2	4	1	2	4	2	5	5	3	4	8	10	1	2	4	138
XLOC_003661	10	81379495	81380735	+	9	6	5	4	1	4	8	7	7	2	8	1	5	8	3	4	7	3	9	7	11	4	12	8	6	4	4	1	7	6	7	4	5	2	9	2	200
XLOC_003662	10	81380789	81383361	+	16	14	20	9	17	18	15	25	26	22	21	9	15	13	21	13	29	14	25	17	36	6	25	15	15	17	21	6	17	19	29	19	19	11	21	21	656
XLOC_003677	10	81866351	81867968	+	8	11	3	3	23	10	7	5	8	7	6	8	9	1	4	8	21	4	13	2	4	2	3	15	7	9	17	5	10	7	8	6	7	6	2	6	275
XLOC_003679	10	81873557	81888470	+	15	4	3	18	11	8	14	12	7	5	21	8	5	11	1	12	16	8	10	9	4	3	4	3	11	3	6	1	11	9	5	4	7	4	3	1	277
XLOC_003693	10	83064055	83064830	+	3	3	5	2	5	2	5	5	3	4	2	3	3	4	4	3	13	4	5	1	4	2	2	2	9	2	4	2	6	3	7	2	3	0	2	2	131
XLOC_003716	10	85079000	85126974	+	905	551	458	524	536	611	1449	650	525	511	653	304	1007	777	724	554	1033	627	1401	396	1132	616	607	644	860	661	1030	472	1432	620	1395	755	896	280	533	620	26749
XLOC_003717	10	85095731	85096346	+	4	7	7	8	5	9	18	6	6	5	8	5	9	8	13	4	8	7	14	3	12	6	4	6	8	3	15	8	13	6	18	5	13	3	5	7	286
XLOC_003748	10	86398054	86399719	+	6	6	5	8	5	5	14	8	6	4	12	16	11	10	2	3	6	6	5	6	6	7	13	3	5	6	4	3	13	7	11	4	5	4	5	13	253
XLOC_003766	10	86802204	86803155	+	4	11	9	19	13	10	10	7	6	7	15	13	13	9	11	6	17	5	5	7	16	8	10	13	9	12	6	12	2	14	10	12	15	8	7	7	358
XLOC_003770	10	87054643	87055415	+	0	5	1	2	6	5	6	5	3	4	7	3	4	4	0	5	5	1	7	5	4	6	6	2	10	4	9	9	5	5	3	6	5	4	7	3	166
XLOC_003783	10	87861996	87863640	+	27	14	9	13	24	21	23	16	42	26	15	13	20	4	9	8	40	23	21	28	53	25	12	19	22	16	8	16	21	20	31	27	31	8	18	20	743
XLOC_003842	10	102839145	102852645	+	0	0	16	1	0	0	0	2	6	0	16	3	2	0	12	0	1	4	2	2	23	6	4	0	0	1	7	0	0	7	0	17	15	5	9	0	161
XLOC_003855	10	104124595	104126396	+	5987	5311	6366	5379	10058	5464	8550	6752	5149	5880	5573	6938	5065	7725	8561	5930	21851	6257	11877	6686	5625	6518	6032	5956	4533	5976	7493	8591	14144	5436	8761	8121	6381	7187	6914	5771	264798
XLOC_003864	10	499858	544807	-	8	8	13	11	6	9	18	5	19	4	10	8	9	19	12	7	6	5	7	8	17	1	5	10	16	15	6	7	8	7	10	12	25	6	20	5	362
XLOC_003873	10	1238355	1238830	-	2	0	6	4	4	3	0	4	0	2	0	2	8	2	1	4	2	4	2	5	2	4	1	5	5	11	3	4	0	4	0	7	3	3	3	2	112
XLOC_003874	10	1239030	1239509	-	10	3	5	2	8	1	1	4	0	0	3	2	5	2	1	1	4	1	0	1	0	0	4	4	3	2	3	1	1	7	1	4	1	2	2	0	89
XLOC_003879	10	1251350	1252483	-	20	6	10	4	7	8	6	4	8	7	12	3	8	6	13	4	17	9	10	5	10	3	7	3	11	7	18	10	9	14	5	9	5	1	8	5	292
XLOC_003885	10	1258099	1468253	-	11	5	4	3	5	4	12	5	3	4	6	5	8	0	4	3	10	8	5	7	7	1	1	2	8	4	8	4	6	8	5	14	6	1	2	2	191
XLOC_003891	10	1380672	1381851	-	7	9	12	4	7	8	9	9	13	3	7	4	5	5	8	3	14	2	4	7	11	1	2	6	9	7	13	4	6	14	8	15	9	4	0	5	254
XLOC_003901	10	1762677	1764353	-	378	253	383	332	339	373	491	400	302	295	392	510	453	264	341	341	667	361	519	466	377	267	411	324	476	254	412	525	528	392	442	547	396	410	456	328	14405
XLOC_003906	10	3992844	3994836	-	9	15	9	20	15	11	12	16	12	12	17	14	6	7	13	9	22	17	20	13	15	21	7	13	7	11	16	20	25	15	17	15	12	2	15	11	491
XLOC_003909	10	4300324	4300886	-	2	5	1	1	6	3	2	3	0	3	4	4	8	2	2	6	4	2	1	1	1	1	1	0	3	1	6	3	3	1	1	2	3	1	3	2	92
XLOC_003917	10	4402685	4404560	-	50	40	43	39	61	35	69	38	33	47	48	42	61	33	52	38	53	36	34	29	42	47	36	32	65	40	45	46	45	57	55	41	42	34	48	51	1607
XLOC_003971	10	10343932	10345797	-	12	4	13	8	3	4	9	11	7	6	13	7	7	12	12	10	13	1	13	2	14	12	12	6	6	11	14	7	12	3	14	13	11	3	7	4	316
XLOC_003977	10	11046538	11047462	-	12	6	4	5	4	5	3	2	9	6	9	1	14	7	3	5	13	5	4	4	21	6	7	7	11	12	10	5	12	9	3	10	7	3	8	8	260
XLOC_003979	10	11255353	11256625	-	4	7	1	15	2	6	6	12	6	1	10	0	6	11	0	10	4	3	3	8	12	0	7	5	4	7	0	11	1	6	8	10	6	2	10	0	204
XLOC_003995	10	11923528	11926230	-	22	11	29	22	23	21	49	14	13	23	17	14	26	27	25	15	41	27	27	15	20	6	18	26	35	14	36	18	49	56	31	27	9	7	22	25	860
XLOC_003997	10	11926976	11929007	-	9	10	3	7	6	12	17	7	9	7	9	5	15	7	15	4	8	15	12	10	5	11	9	10	8	5	16	16	12	16	23	9	4	3	4	5	343
XLOC_004019	10	12371023	12371251	-	18	5	7	18	13	12	15	12	24	10	14	3	11	9	18	8	19	16	8	18	23	21	9	17	12	7	24	7	17	20	14	17	20	3	13	10	492
XLOC_004031	10	13312514	13313551	-	62	53	36	54	36	38	54	70	51	41	44	15	51	29	44	21	49	47	50	39	67	33	33	22	53	32	50	34	38	48	51	44	51	7	30	34	1511
XLOC_004048	10	13987757	13988888	-	2	8	3	1	8	1	5	8	3	1	7	3	3	4	3	1	5	3	1	4	4	2	3	2	4	4	7	1	5	7	3	9	11	0	3	3	142
XLOC_004049	10	13989262	13989916	-	1	6	5	1	3	2	4	2	3	7	3	0	3	4	4	1	8	2	1	5	3	1	6	0	4	10	4	3	5	2	4	5	3	2	0	4	121
XLOC_004060	10	15019583	15020493	-	6	1	3	3	4	4	11	3	6	2	4	2	5	6	1	1	2	4	7	2	8	3	4	4	2	0	2	1	15	8	8	1	3	1	5	3	145
XLOC_004063	10	15022407	15023193	-	3	3	2	1	2	1	3	1	2	2	8	0	1	0	0	2	4	1	11	0	4	3	5	0	1	0	1	0	4	4	1	6	4	0	7	2	89
XLOC_004065	10	15044504	15067533	-	53	49	68	46	50	36	60	56	46	55	58	86	54	60	56	56	66	51	80	51	100	62	39	64	44	51	71	72	93	62	92	59	64	39	47	67	2163
XLOC_004108	10	19720851	19721704	-	3	4	3	3	2	3	6	6	3	8	6	2	2	5	6	4	9	4	7	3	4	0	6	2	8	3	9	1	8	4	5	5	4	5	7	10	170
XLOC_004124	10	20764250	20765788	-	21	12	8	14	9	16	26	11	16	10	14	6	17	16	11	12	29	15	23	11	18	15	21	4	16	19	19	9	17	12	9	18	15	6	13	11	519
XLOC_004126	10	20792423	20796820	-	47	38	26	41	33	47	52	33	47	35	44	22	55	35	43	31	46	47	33	35	62	35	34	32	54	28	60	34	59	45	64	47	46	25	35	40	1490
XLOC_004268	10	26624178	26625518	-	22	10	8	10	7	17	11	10	11	13	13	9	20	9	9	10	10	6	12	14	13	9	18	6	7	9	21	12	14	4	23	14	13	4	11	5	414
XLOC_004269	10	26626146	26627386	-	13	8	8	6	10	17	17	6	5	5	9	0	21	11	14	8	12	4	12	9	8	5	11	4	12	11	19	8	11	10	17	12	4	2	12	7	348
XLOC_004271	10	26633547	26633811	-	9	1	2	2	5	4	7	4	1	9	7	3	7	7	6	5	4	5	11	4	3	6	2	4	5	1	8	0	5	5	13	7	3	1	5	2	173
XLOC_004272	10	26642762	26643618	-	10	3	7	1	10	10	6	2	0	6	1	1	9	2	11	1	5	2	9	5	5	1	3	1	11	15	8	2	7	6	6	5	1	0	3	2	177
XLOC_004276	10	26691672	26693523	-	42	20	19	29	16	33	52	42	26	25	68	38	83	22	17	36	24	59	69	28	33	26	36	20	89	36	35	43	31	120	48	75	48	35	45	28	1496
XLOC_004335	10	30421799	30429487	-	374	341	300	348	370	298	370	230	365	348	378	217	372	292	313	279	422	286	428	291	412	320	319	240	322	277	397	306	442	296	444	281	363	154	327	277	11799
XLOC_004337	10	30522425	30531951	-	418	498	432	535	539	387	638	366	461	515	642	409	418	260	425	318	475	404	737	394	596	418	457	452	461	279	534	427	429	359	588	502	509	294	516	505	16597
XLOC_004365	10	35946995	35970373	-	186	216	254	195	183	139	241	139	167	194	189	242	195	140	274	127	117	200	285	147	259	219	193	205	193	187	276	223	142	154	259	203	209	91	178	215	7036
XLOC_004395	10	36597211	36597695	-	2	1	5	3	1	3	7	4	1	5	2	1	1	3	0	1	1	0	8	0	1	0	0	1	4	2	5	3	1	7	8	4	2	2	0	4	93
XLOC_004398	10	36733844	36735017	-	11	7	4	3	12	4	10	3	2	0	3	3	12	3	4	0	4	7	7	5	8	6	2	12	5	9	10	8	6	3	4	6	7	0	9	4	203
XLOC_004412	10	36918678	36924638	-	31	34	16	35	16	21	51	29	36	24	29	17	20	38	22	17	44	36	31	41	47	22	26	23	22	19	36	24	26	29	32	33	42	8	27	21	1025
XLOC_004416	10	37071464	37071828	-	4	4	6	7	3	5	10	1	5	3	9	6	4	8	6	4	5	6	2	8	8	4	5	3	9	1	10	9	11	4	8	11	4	3	5	4	205
XLOC_004436	10	38296120	38297110	-	12	3	8	6	11	10	9	4	6	2	7	10	5	3	9	2	9	9	6	4	13	4	3	6	8	13	11	0	6	2	7	6	3	5	12	7	241
XLOC_004458	10	42903208	42904346	-	136	147	199	149	158	140	203	120	123	162	126	133	175	190	171	107	256	131	194	102	236	139	130	143	145	177	268	208	221	171	192	186	209	95	175	193	6010
XLOC_004462	10	43075520	43077827	-	14	10	11	10	11	15	11	7	16	9	12	4	4	10	11	10	17	10	22	11	27	16	9	15	11	8	17	10	27	13	15	24	13	2	12	19	463
XLOC_004463	10	43078059	43079755	-	5	4	4	8	5	11	13	4	5	7	8	1	1	4	17	9	23	9	9	7	8	6	4	7	5	14	8	8	20	9	12	15	10	3	4	7	294
XLOC_004464	10	43080584	43081200	-	1	0	2	5	5	3	6	4	1	4	3	1	5	5	1	3	6	4	3	0	8	4	3	1	2	5	5	2	3	6	3	5	6	2	1	2	120
XLOC_004465	10	43082195	43082643	-	0	2	1	5	4	1	7	1	3	5	2	1	0	5	5	3	4	1	1	2	2	6	1	0	1	3	3	3	3	4	3	4	1	0	1	5	93
XLOC_004466	10	43083050	43084429	-	5	5	0	10	7	4	8	3	5	2	5	6	5	12	6	0	11	6	4	3	14	3	4	4	3	8	8	8	11	12	9	8	9	4	3	3	218
XLOC_004531	10	47018131	47019956	-	19	6	0	6	13	5	12	2	8	6	17	8	5	6	5	31	11	20	33	7	7	5	8	6	8	7	2	1	9	1	15	5	5	1	8	0	308
XLOC_004534	10	47022943	47024041	-	4	0	0	3	3	4	7	0	7	1	0	0	2	3	0	8	4	4	10	3	1	5	0	1	2	2	1	4	1	0	6	0	0	0	0	0	86
XLOC_004539	10	47032584	47034114	-	11	6	4	2	9	7	11	5	10	7	12	10	7	3	9	18	6	15	28	4	6	2	3	3	3	5	2	1	8	2	10	6	7	3	7	4	256
XLOC_004544	10	47045071	47047698	-	16	6	4	6	5	8	14	2	7	5	2	7	4	4	5	13	9	20	14	5	5	4	9	6	3	7	0	3	6	0	8	4	4	1	4	8	228
XLOC_004546	10	47075320	47076378	-	6	8	7	11	15	5	9	3	4	3	9	1	8	5	4	3	23	3	11	5	9	3	8	2	7	11	4	0	11	3	9	5	6	4	6	4	235
XLOC_004547	10	47076991	47079008	-	7	4	6	14	7	7	15	5	13	7	16	7	10	3	13	26	21	2	14	11	6	6	8	4	9	9	5	8	7	7	16	7	6	1	2	7	316
XLOC_004555	10	47300018	47301238	-	9	3	7	5	12	11	5	2	10	8	4	5	9	5	5	3	3	6	8	3	10	9	3	6	8	10	12	7	2	2	7	6	5	2	3	5	220
XLOC_004560	10	47954955	47955796	-	4	3	3	1	2	1	4	4	4	4	7	6	3	3	2	3	4	4	8	3	10	2	6	2	4	4	12	3	4	5	9	8	4	0	6	3	155
XLOC_004563	10	48796940	48820405	-	9	3	3	4	6	3	5	1	4	7	7	10	0	7	2	13	36	8	8	1	2	7	3	4	1	2	1	1	5	7	2	3	3	3	0	0	181
XLOC_004565	10	49840459	49859908	-	72	48	32	29	50	57	62	60	51	44	80	69	74	59	55	68	64	56	77	40	63	44	37	40	68	49	46	40	77	104	60	69	39	25	40	45	1993
XLOC_004601	10	55094325	55112527	-	4	1	2	1	6	2	0	3	1	4	3	5	4	2	5	3	8	2	7	5	8	2	4	1	2	2	8	5	5	5	5	3	6	1	3	5	133
XLOC_004620	10	59558327	59559490	-	2	5	1	6	4	4	1	7	7	8	7	1	3	7	3	8	15	7	3	2	5	5	1	4	4	1	5	1	7	6	2	4	4	2	0	4	156
XLOC_004638	10	60864627	60866211	-	3	7	5	15	3	6	6	6	12	6	11	6	6	10	12	11	19	2	20	11	17	6	12	8	2	9	11	6	16	5	13	11	15	2	16	9	335
XLOC_004642	10	60868246	60883148	-	1	5	5	2	1	3	12	2	2	2	3	0	3	6	7	7	6	0	8	3	6	5	4	3	4	2	9	1	5	3	7	8	11	1	12	2	161
XLOC_004647	10	60883399	60884767	-	9	10	5	6	8	3	10	9	11	7	6	7	5	8	4	7	9	5	11	5	10	8	7	4	5	6	14	3	18	9	12	5	4	4	3	4	261
XLOC_004648	10	60885187	60886095	-	2	1	5	2	3	0	3	6	8	1	9	1	7	7	6	2	9	3	12	2	10	15	5	2	1	8	8	6	8	6	8	4	3	0	7	4	184
XLOC_004694	10	65250198	65251193	-	5	4	2	6	7	7	1	2	3	9	0	8	4	2	8	7	2	9	3	6	9	3	2	14	7	2	2	8	2	7	1	4	3	6	8	16	189
XLOC_004704	10	65564196	65565278	-	5	6	4	13	10	4	4	7	4	13	10	2	3	6	5	9	8	6	3	3	9	6	7	4	6	5	4	8	10	9	4	6	7	2	6	6	224
XLOC_004705	10	65565508	65566479	-	3	7	7	4	6	4	6	4	2	5	8	3	1	2	6	5	14	1	2	3	8	9	4	4	5	5	3	8	9	8	6	2	5	1	3	2	175
XLOC_004716	10	66751296	66758373	-	58	73	57	53	47	45	115	53	46	54	68	58	97	91	58	59	127	85	131	42	130	56	55	72	65	54	100	42	129	69	135	82	80	59	65	71	2681
XLOC_004752	10	70816245	70818937	-	19	3	5	13	11	30	31	16	13	9	16	18	19	13	17	13	24	28	26	17	16	11	13	12	28	22	18	12	40	26	27	16	9	3	7	12	613
XLOC_004753	10	70819095	70821996	-	15	8	4	22	17	10	32	15	17	6	16	8	22	10	18	11	23	20	21	7	15	20	7	11	22	16	23	5	31	33	21	16	16	1	9	13	561
XLOC_004755	10	70823904	70838652	-	424	292	309	333	334	373	474	385	368	320	359	297	335	350	354	273	499	376	436	348	394	323	299	283	382	334	364	287	456	443	480	382	412	139	321	338	12876
XLOC_004772	10	72721370	72724632	-	15	16	10	20	17	23	22	21	20	22	29	19	13	31	18	13	28	38	29	26	42	15	19	18	14	26	30	9	21	47	22	31	29	4	27	16	800
XLOC_004782	10	73645403	73645987	-	4	4	1	5	2	4	0	8	0	6	2	1	2	3	1	2	11	4	4	1	3	1	3	5	3	3	7	4	7	2	5	3	2	2	0	4	119
XLOC_004792	10	76146556	76148086	-	9	11	8	4	17	6	16	13	5	4	5	5	10	7	26	6	12	5	12	10	9	7	10	6	8	6	8	9	8	5	21	12	7	10	10	10	337
XLOC_004796	10	76298114	76298318	-	8	5	3	6	6	2	13	6	7	0	3	7	12	6	6	2	9	7	7	3	14	0	4	16	6	6	11	1	6	3	13	10	7	0	8	7	230
XLOC_004797	10	76300472	76300883	-	13	9	7	9	11	13	9	13	11	23	9	5	8	9	13	9	13	7	8	8	22	24	9	7	17	12	13	3	12	7	15	8	7	13	12	13	401
XLOC_004804	10	76928661	76936157	-	71	52	44	71	56	95	93	73	54	64	88	28	66	87	81	61	105	98	96	71	122	79	60	53	68	65	97	35	117	123	100	80	76	11	72	59	2671
XLOC_004822	10	77504800	77505894	-	9	3	5	0	6	3	2	5	4	5	1	2	5	5	3	3	4	2	3	4	2	2	4	8	2	1	13	2	6	6	1	4	4	2	4	1	136
XLOC_004831	10	78391761	78393498	-	12	4	0	9	14	8	19	8	1	4	7	2	5	10	10	5	13	13	24	8	8	2	3	4	2	5	2	4	1	3	13	11	6	1	0	4	245
XLOC_004834	10	78427286	78428229	-	11	3	1	1	7	3	10	9	2	0	4	1	5	5	2	5	12	2	16	4	0	0	0	1	2	3	2	5	3	4	3	2	4	0	0	1	133
XLOC_004835	10	78428487	78428964	-	2	6	0	0	6	1	5	4	0	0	0	1	7	1	1	8	3	2	7	1	1	0	2	1	1	1	2	0	1	1	2	1	0	0	0	0	68
XLOC_004856	10	78549302	78550199	-	6	1	1	1	5	2	5	0	4	1	1	3	4	1	2	0	8	7	11	0	0	5	3	3	1	2	2	0	5	3	5	1	0	0	0	0	93
XLOC_004863	10	78556282	78557306	-	13	4	2	3	8	3	12	15	6	2	12	6	8	8	7	11	10	9	10	8	1	3	7	3	5	3	8	5	5	2	13	11	3	3	10	3	242
XLOC_004869	10	78561079	78715779	-	103	51	70	55	96	49	73	88	53	42	46	67	87	71	78	82	111	80	123	89	52	86	69	58	86	57	63	73	65	37	73	68	58	44	59	39	2501
XLOC_004872	10	78586792	78588558	-	8	13	5	6	27	2	10	4	1	7	0	5	12	3	4	5	8	2	15	5	2	1	1	0	6	4	0	2	8	4	7	1	0	1	1	7	187
XLOC_004885	10	78687472	78695487	-	12	5	3	0	11	6	4	1	2	5	5	14	4	1	7	1	1	9	5	4	1	2	1	6	5	6	3	1	4	1	5	3	2	3	4	2	149
XLOC_004888	10	79579898	79580914	-	66	69	59	49	70	56	64	46	42	58	58	40	73	50	58	42	87	34	60	51	91	54	45	48	72	43	67	75	75	56	58	68	58	35	70	60	2107
XLOC_004895	10	80083419	80132175	-	544	413	506	511	419	317	443	429	447	410	457	384	558	420	413	521	577	360	494	423	674	429	492	390	541	461	573	786	449	343	605	531	600	485	497	419	17321
XLOC_004897	10	80103549	80105099	-	10	11	7	10	16	14	13	8	8	6	19	8	12	10	4	9	9	15	19	10	15	11	5	10	10	11	11	7	13	10	12	9	10	3	8	13	376
XLOC_004904	10	80971149	80973265	-	10	12	10	9	7	16	14	24	8	8	10	6	7	12	5	13	42	8	30	12	10	14	5	8	11	5	13	3	31	17	12	27	6	7	13	3	448
XLOC_004911	10	81184498	81185584	-	5	4	0	4	8	7	4	2	2	9	3	1	3	4	8	1	10	4	4	5	10	2	4	4	6	2	4	0	2	2	7	2	10	0	4	3	150
XLOC_004939	10	82495256	82496777	-	2	6	1	7	2	7	5	2	0	6	9	3	4	13	4	4	5	1	8	3	7	5	5	6	3	8	7	2	11	6	2	5	6	4	15	3	187
XLOC_004955	10	83960443	83960647	-	4	0	3	0	7	0	0	3	9	0	0	0	6	1	3	0	29	0	0	2	21	0	0	0	3	5	8	0	8	0	0	12	5	0	0	0	129
XLOC_004964	10	85351686	85352490	-	0	3	2	5	5	3	0	2	3	0	4	1	3	0	3	3	9	2	5	5	0	3	4	1	0	5	4	1	5	4	8	3	4	2	2	3	107
XLOC_004984	10	86333920	86336895	-	25	28	12	22	11	25	26	22	15	20	14	7	20	10	19	19	22	18	24	16	15	13	18	16	29	11	34	25	31	21	18	18	18	17	13	22	694
XLOC_004994	10	86553108	86569234	-	53	41	31	42	27	25	63	47	52	32	28	29	69	44	39	50	66	55	53	40	104	31	42	30	63	66	84	52	75	35	84	59	69	15	39	32	1766
XLOC_005008	10	87742627	87746464	-	68	25	167	41	73	206	67	215	154	92	149	85	132	78	93	65	57	211	78	154	246	61	88	45	130	55	118	67	107	348	78	211	263	99	201	43	4370
XLOC_005034	10	92260037	92261024	-	8	1	3	5	5	6	16	11	4	3	8	8	10	1	4	1	5	14	10	5	5	9	1	1	6	0	3	3	4	16	8	10	3	1	1	4	203
XLOC_005053	10	92401605	92402436	-	4	5	3	3	10	5	8	3	4	3	10	2	3	7	1	3	3	7	5	5	8	3	4	4	9	2	4	3	5	5	1	11	8	1	2	3	167
XLOC_005055	10	92403182	92405080	-	9	6	10	6	11	12	17	11	11	7	16	5	12	9	10	12	5	7	22	6	21	5	2	3	8	4	5	1	3	11	8	10	7	3	3	10	308
XLOC_005082	10	95707475	95707716	-	14	9	12	14	12	7	4	10	18	10	8	10	16	10	8	8	12	14	6	12	17	4	10	19	9	9	12	19	15	5	13	7	22	14	19	13	421
XLOC_005092	10	100869128	100871992	-	28	23	19	29	24	13	11	30	33	46	49	25	12	57	3	5	50	21	27	38	26	27	20	12	9	45	19	3	33	17	16	32	29	11	10	16	868
XLOC_005093	10	100872512	100938144	-	177	149	171	145	165	65	109	166	158	265	173	95	79	257	71	77	214	92	119	152	161	186	106	89	67	277	161	164	159	124	75	140	159	113	83	81	5044
XLOC_005094	10	100883711	100884243	-	4	6	6	3	6	0	3	3	2	12	5	1	3	3	2	1	5	2	3	7	2	5	0	5	1	10	4	9	4	0	4	4	1	1	2	1	130
XLOC_005103	10	102692767	102693501	-	3	6	4	4	6	4	4	0	0	1	7	5	2	4	4	8	4	6	6	4	4	2	3	5	7	6	1	6	4	3	8	1	4	2	5	4	147
XLOC_005109	10	102835593	102839064	-	0	2	80	1	0	0	1	1	30	0	97	25	6	1	61	0	1	25	3	55	135	50	28	0	1	0	40	0	1	47	2	91	99	43	33	0	959
XLOC_005123	10	103779903	103782878	-	20	22	4	8	15	11	16	9	16	28	24	18	21	14	10	22	22	21	33	13	35	28	12	22	23	15	8	15	32	32	14	19	16	20	17	25	680
XLOC_005124	10	103782948	103784291	-	12	8	2	7	4	7	10	4	4	10	6	8	7	12	1	8	8	8	18	7	9	5	5	8	10	5	4	8	10	15	10	7	7	4	3	2	263
XLOC_005126	10	103784922	103785923	-	3	3	0	4	2	2	3	2	3	1	2	4	4	4	2	4	3	9	3	5	5	6	0	1	3	3	0	0	9	7	4	5	2	1	1	7	117
XLOC_005128	10	103786625	103787148	-	0	1	1	3	5	2	5	4	3	3	1	1	4	2	0	1	1	7	6	5	7	6	2	5	4	4	3	2	2	7	5	1	3	2	4	5	117
XLOC_005129	10	103787305	103788332	-	5	9	0	7	4	5	8	4	4	2	7	6	8	4	6	5	8	7	10	6	11	9	4	7	11	7	7	2	8	10	5	5	8	7	2	4	222
XLOC_005138	10	103798667	103799342	-	4	0	4	3	3	3	6	1	1	3	1	5	2	3	2	5	7	5	2	3	6	4	7	2	4	7	5	3	3	6	11	8	6	4	1	3	143
XLOC_005139	10	103800604	103802393	-	6	1	0	3	2	4	2	3	5	3	2	7	3	8	3	13	8	6	8	7	2	4	6	4	3	3	10	6	5	7	2	5	4	3	6	1	165
XLOC_005143	10	103889991	103899079	-	19	22	20	20	26	29	37	25	34	22	25	22	34	26	24	24	29	30	37	28	34	28	19	27	24	29	34	36	35	38	48	28	30	20	21	24	1008
XLOC_005144	10	103896454	103897295	-	4	3	2	8	6	4	13	7	1	7	2	4	2	6	12	3	8	6	12	6	12	6	2	4	2	10	6	11	5	3	8	9	6	0	2	4	206
XLOC_005150	10	104125755	104126172	-	2	3	7	1	8	4	5	1	4	4	2	2	4	11	6	0	17	8	10	2	0	2	2	11	5	4	8	2	11	6	4	4	6	3	6	0	175
XLOC_005164	11	816123	1084919	+	34	37	41	42	29	34	71	39	42	43	44	34	53	46	34	45	60	34	75	30	62	34	48	49	17	26	47	34	74	30	45	33	61	51	63	28	1569
XLOC_005177	11	1044877	1046318	+	4	9	3	9	5	7	10	5	10	5	4	9	13	13	4	10	16	2	12	7	8	6	9	9	9	8	18	9	15	6	8	5	9	3	9	6	294
XLOC_005182	11	1092222	1094031	+	6	7	6	10	2	6	18	12	8	3	7	4	8	15	1	7	12	6	16	3	10	6	6	11	3	11	17	13	16	2	13	10	11	0	7	11	304
XLOC_005224	11	2766442	2767614	+	5	2	1	1	5	2	2	3	2	2	1	0	4	3	9	2	13	2	8	2	5	0	2	4	0	4	5	4	6	4	8	7	7	1	3	4	133
XLOC_005225	11	2771811	2775293	+	15	11	12	11	16	23	16	17	14	6	32	12	24	31	16	7	46	17	29	16	28	7	12	5	18	23	29	8	34	15	32	29	23	5	12	12	663
XLOC_005238	11	4139986	4141275	+	13	7	5	9	7	3	7	17	6	10	19	7	8	11	9	10	15	14	8	6	14	14	7	6	14	8	8	8	9	13	21	22	17	2	13	7	374
XLOC_005253	11	5565411	5569535	+	32	21	28	18	25	34	38	9	27	23	43	8	25	20	39	14	23	24	48	5	34	24	46	14	32	13	48	32	35	29	28	7	43	18	26	17	950
XLOC_005262	11	6150075	6150660	+	2	2	4	6	1	1	3	2	3	1	6	0	4	2	3	8	3	3	2	5	3	1	0	3	5	6	2	4	2	2	3	2	4	4	3	3	108
XLOC_005276	11	6800159	6800905	+	1	4	1	3	2	3	3	5	3	3	7	7	2	2	1	6	8	4	5	3	3	0	5	2	1	5	4	9	3	5	3	6	6	0	4	0	129
XLOC_005295	11	9234772	9236196	+	12	2	3	3	11	5	11	8	0	3	7	5	11	5	8	7	7	5	6	5	6	14	13	7	13	10	3	7	8	8	7	9	6	2	9	8	254
XLOC_005300	11	9791031	9791655	+	4	3	10	2	3	3	4	4	2	1	1	6	2	2	1	3	3	3	1	1	2	14	6	1	3	5	4	2	5	4	4	1	4	3	0	2	119
XLOC_005310	11	10107164	10109257	+	13	16	11	17	25	12	10	31	18	16	17	13	13	26	21	18	18	13	21	31	14	18	7	17	12	22	19	18	21	23	7	23	13	8	12	20	614
XLOC_005322	11	10221425	10226002	+	7	8	10	7	7	12	10	8	9	10	6	25	9	4	6	7	11	6	12	15	11	8	8	14	3	8	11	12	18	17	9	10	10	11	5	5	349
XLOC_005336	11	11207122	11207589	+	10	4	6	14	9	3	7	8	8	10	11	9	10	19	7	9	4	6	13	7	10	13	15	6	4	15	10	13	8	8	13	8	10	7	14	7	335
XLOC_005337	11	11208866	11209630	+	6	1	6	7	7	3	8	5	3	4	10	3	4	7	2	7	11	7	6	5	7	4	3	3	11	6	6	13	7	8	4	2	11	7	6	3	213
XLOC_005358	11	13415205	13416210	+	20	13	18	15	18	17	19	27	14	15	25	12	24	23	10	10	20	20	17	25	18	4	18	20	26	32	21	23	14	22	22	37	25	11	15	20	690
XLOC_005384	11	14958618	14959425	+	8	0	5	3	10	4	3	8	4	10	8	3	3	3	3	3	4	2	9	1	11	3	4	4	6	4	8	2	1	2	7	7	3	4	1	3	164
XLOC_005391	11	15197557	15199611	+	14	28	3	18	22	16	14	13	18	20	13	10	9	13	15	12	21	20	21	8	23	12	16	23	16	12	22	20	18	16	23	22	11	5	14	12	573
XLOC_005392	11	15199676	15201306	+	18	17	8	12	17	20	13	9	15	16	11	11	15	19	14	11	17	14	22	11	28	6	10	16	17	17	22	12	29	19	19	11	18	6	18	17	555
XLOC_005398	11	16138045	16138944	+	3	4	3	2	3	7	6	7	6	0	6	1	3	2	1	2	7	3	9	1	4	10	5	3	9	9	7	1	10	6	5	4	9	3	6	6	173
XLOC_005400	11	16140430	16142190	+	20	12	6	6	8	10	16	14	13	13	7	14	20	9	15	8	16	9	17	12	11	20	13	10	12	11	12	16	17	10	20	22	22	4	11	15	471
XLOC_005410	11	19622115	19622747	+	0	3	2	3	5	1	2	0	4	4	2	3	3	0	5	0	13	10	6	0	5	2	1	3	3	1	7	2	9	3	2	4	8	1	3	1	121
XLOC_005429	11	21155764	21156399	+	6	6	1	3	3	6	6	7	3	6	3	4	4	8	5	5	11	1	8	0	2	2	1	3	5	3	1	3	3	4	10	6	0	4	6	1	150
XLOC_005430	11	21156894	21157683	+	5	3	3	3	1	8	3	2	4	2	1	4	2	5	3	2	2	3	9	3	5	2	2	6	5	1	6	4	4	3	11	4	1	1	5	13	141
XLOC_005443	11	22914996	22916542	+	4	5	1	5	1	5	9	5	5	0	13	8	7	10	4	12	11	3	8	8	13	9	5	2	5	4	4	4	10	7	19	10	9	3	9	7	244
XLOC_005480	11	25593754	25601180	+	22	14	12	13	15	16	21	14	17	15	21	16	17	22	12	18	47	24	19	15	38	17	16	16	20	12	30	10	32	29	18	16	17	11	8	15	675
XLOC_005491	11	26431977	26432894	+	6	0	1	4	2	1	5	0	2	5	1	1	1	3	2	2	11	9	4	2	3	1	0	1	1	2	6	0	2	6	5	1	3	1	2	3	99
XLOC_005493	11	26441514	26442435	+	0	0	1	3	5	6	3	3	3	0	7	2	1	0	2	2	5	2	1	4	3	1	3	2	5	3	4	6	10	1	3	3	2	1	1	4	102
XLOC_005517	11	28916007	28917663	+	7	6	4	4	8	5	19	20	9	2	17	5	7	5	3	5	9	7	8	18	6	5	15	7	15	3	6	6	16	6	4	9	7	3	11	10	297
XLOC_005526	11	29390686	29392620	+	30	9	12	11	22	4	25	19	10	17	16	2	22	31	19	4	14	8	26	7	28	11	12	5	25	25	22	6	25	13	22	9	18	5	7	10	551
XLOC_005527	11	29483329	29485803	+	9	4	6	8	11	7	10	10	12	13	6	5	12	4	5	1	2	8	14	6	20	5	7	6	16	5	13	10	5	14	10	18	11	12	13	8	326
XLOC_005529	11	29639397	29640960	+	38	35	27	43	28	37	32	17	24	37	49	42	41	35	26	35	61	31	56	25	40	36	26	22	30	37	29	46	63	55	40	38	34	33	33	41	1322
XLOC_005537	11	30741712	30743058	+	0	6	4	4	4	4	4	5	5	8	12	3	7	9	6	9	9	6	14	5	18	7	6	7	2	6	14	2	7	6	7	7	4	0	6	1	224
XLOC_005538	11	30743187	30743873	+	6	3	1	2	2	2	1	0	1	4	3	3	1	5	0	1	10	3	11	3	7	3	5	1	5	1	3	0	4	3	7	4	4	0	7	6	122
XLOC_005540	11	31584967	31842155	+	46	13	7	14	30	19	43	37	1	8	34	8	49	17	0	22	31	18	47	25	7	5	22	4	52	17	7	10	27	23	52	41	7	12	30	7	792
XLOC_005543	11	31826568	31827221	+	5	2	2	5	6	0	1	5	0	1	8	0	5	2	2	3	3	6	6	13	2	0	3	0	13	9	3	0	4	8	8	8	2	1	5	0	141
XLOC_005545	11	31828271	31831533	+	40	14	4	10	29	10	24	51	1	2	38	4	38	24	2	17	17	35	11	41	6	6	19	4	47	25	6	6	28	36	29	58	6	4	15	4	711
XLOC_005555	11	31856568	31857319	+	10	1	0	1	11	1	6	1	0	0	4	2	8	1	0	0	4	0	6	4	5	0	4	2	8	3	0	5	5	2	6	7	0	2	2	2	113
XLOC_005565	11	31891327	31899152	+	84	32	13	39	86	43	73	68	6	20	82	21	80	55	5	40	49	59	64	82	15	2	59	15	99	65	7	50	82	69	95	80	17	23	53	13	1745
XLOC_005574	11	31909401	31910628	+	12	3	1	2	15	10	5	10	0	0	10	1	13	7	0	4	6	9	7	8	1	1	6	2	12	13	0	1	13	11	2	9	1	1	4	0	200
XLOC_005577	11	31913776	31914374	+	5	0	0	2	0	5	5	7	0	0	4	0	7	4	1	1	6	3	3	6	0	1	2	1	7	1	0	1	7	8	5	5	0	0	4	1	102
XLOC_005579	11	31916424	31919357	+	50	9	3	11	54	39	25	49	1	3	61	1	62	23	1	20	26	47	30	40	12	3	33	4	61	21	3	11	49	51	48	39	3	2	28	5	928
XLOC_005596	11	36406054	36407058	+	4	7	3	8	9	7	4	6	1	4	3	2	7	2	3	5	4	4	3	10	9	2	6	10	4	7	5	7	10	10	5	6	1	1	2	5	186
XLOC_005607	11	37863478	37865232	+	3	5	3	4	0	2	24	1	3	18	21	19	1	3	2	4	0	0	11	3	3	14	14	16	4	5	1	2	4	2	22	1	1	13	14	25	268
XLOC_005611	11	38150968	38169538	+	22	23	17	26	23	15	25	27	25	24	31	30	29	29	25	24	45	23	37	31	29	13	26	13	31	21	32	18	28	41	38	31	29	19	22	19	941
XLOC_005623	11	43536578	43537631	+	12	2	4	2	10	6	4	3	8	2	7	10	7	6	1	2	3	8	6	4	4	6	5	5	7	11	8	3	4	2	2	4	8	0	11	4	191
XLOC_005624	11	43537770	43538783	+	14	7	4	6	13	6	7	6	4	3	5	7	14	5	3	7	11	11	6	11	5	12	13	8	9	8	9	12	9	6	9	11	8	4	12	3	288
XLOC_005625	11	43539204	43541199	+	14	4	12	12	24	12	10	13	18	13	11	13	19	14	5	15	20	18	17	10	14	6	10	10	24	7	13	6	9	12	10	13	10	5	11	14	448
XLOC_005630	11	43648116	43649296	+	12	8	5	11	9	7	7	2	4	2	15	5	2	8	5	8	14	10	6	4	8	3	8	6	12	2	7	3	9	9	6	6	1	6	14	2	246
XLOC_005639	11	44041694	44042481	+	3	6	4	6	2	2	4	2	6	3	3	7	6	6	4	2	7	3	11	3	9	2	7	2	4	3	6	3	8	4	7	5	3	1	2	4	160
XLOC_005655	11	46177354	46178312	+	12	5	4	5	9	1	6	2	6	6	6	6	5	5	3	4	7	7	6	2	6	11	7	12	2	3	10	3	9	9	13	0	14	3	12	5	226
XLOC_005656	11	46178500	46180455	+	12	15	24	12	11	9	12	12	14	20	23	12	14	18	30	11	20	16	16	13	26	14	17	16	14	12	38	7	25	17	16	13	29	6	22	12	598
XLOC_005657	11	46180815	46182419	+	23	10	18	14	15	3	17	10	24	16	16	12	19	21	9	14	20	12	20	5	15	7	14	13	17	13	16	14	13	11	20	6	19	4	10	17	507
XLOC_005689	11	48148275	48148643	+	2	5	3	7	4	3	3	3	3	6	4	3	1	2	5	12	5	5	5	2	3	5	6	5	2	2	5	3	4	5	0	9	4	2	4	5	147
XLOC_005690	11	48148743	48149064	+	9	11	12	7	9	5	10	5	6	7	15	6	9	22	12	11	15	6	11	10	12	7	5	10	9	8	5	14	14	5	10	14	8	8	11	3	341
XLOC_005704	11	48916825	48918059	+	7	16	5	1	5	3	3	7	11	2	6	4	2	7	3	4	8	6	7	2	6	4	5	3	6	5	10	5	8	4	3	11	4	1	5	5	194
XLOC_005711	11	49857654	49859115	+	49	58	44	62	52	38	68	61	52	56	66	69	73	58	37	61	58	69	68	59	63	38	55	42	58	31	71	68	73	75	66	64	43	58	49	64	2076
XLOC_005750	11	63220483	63221451	+	8	3	4	5	3	4	13	6	5	4	11	10	13	2	6	0	5	6	2	5	5	3	4	9	9	1	3	15	2	3	7	6	3	1	4	3	193
XLOC_005754	11	63499250	63499686	+	13	16	3	12	10	1	12	10	7	9	8	9	13	3	6	5	11	6	15	10	13	10	8	2	8	6	7	8	12	6	18	6	7	10	19	7	326
XLOC_005794	11	68584012	68585794	+	12	9	7	9	13	12	11	20	12	16	9	9	10	7	6	16	9	12	12	15	16	9	6	14	5	18	17	6	13	27	12	21	17	7	10	12	436
XLOC_005802	11	70903273	70903807	+	6	3	1	3	6	3	7	3	2	2	5	2	6	5	9	5	6	8	4	8	5	11	5	4	9	6	9	2	6	4	6	9	3	3	6	8	190
XLOC_005888	11	75279641	75280801	+	2	4	4	5	3	3	6	7	8	15	7	3	4	2	3	7	5	0	6	3	12	11	5	1	0	8	6	4	3	11	8	5	9	3	2	7	192
XLOC_005889	11	75282293	75283761	+	6	9	3	12	11	6	7	5	9	9	4	0	2	11	5	2	17	9	2	9	16	6	6	2	11	15	10	6	10	6	15	7	6	2	6	7	269
XLOC_005892	11	75285131	75286456	+	6	7	4	12	11	10	3	6	2	11	8	6	6	8	7	4	6	17	8	9	8	3	5	7	14	7	6	3	11	14	12	9	4	2	6	7	269
XLOC_005909	11	78920948	78946153	+	18	12	7	13	5	2	24	10	15	5	8	14	12	10	15	16	20	17	17	18	22	19	19	9	10	10	33	13	21	13	20	13	20	7	10	8	505
XLOC_005915	11	79145422	79184250	+	38	28	41	28	31	48	24	25	43	29	58	32	43	28	29	36	40	39	50	42	64	32	47	42	32	40	24	24	34	66	30	29	48	18	55	26	1343
XLOC_005918	11	79150730	79152128	+	5	8	10	2	5	7	12	8	17	7	8	2	3	5	5	7	6	11	8	8	31	8	9	11	6	12	8	4	4	6	4	4	13	0	4	2	270
XLOC_005921	11	79156560	79158556	+	8	11	11	15	10	18	6	19	13	10	22	3	14	8	10	12	10	16	14	24	22	13	20	8	12	9	22	12	10	20	19	12	7	0	13	7	460
XLOC_005922	11	79158688	79159877	+	12	6	8	11	6	14	6	12	13	4	16	2	8	15	11	8	10	20	11	12	15	8	13	7	14	7	12	2	8	9	14	6	15	2	9	2	348
XLOC_005923	11	79159996	79165617	+	76	42	42	37	65	89	64	64	93	43	107	59	89	60	66	53	60	74	117	65	93	87	91	43	89	71	73	43	80	95	87	66	90	5	61	41	2480
XLOC_005931	11	80317338	80319007	+	0	9	17	15	6	10	7	10	9	19	19	48	3	7	16	27	16	10	19	7	17	14	12	12	5	14	10	27	6	19	11	14	12	23	10	19	499
XLOC_005938	11	82510304	82605661	+	6	13	6	19	9	9	5	24	10	11	12	16	3	31	6	40	7	8	3	18	10	11	19	7	5	13	10	17	10	2	8	9	14	10	13	4	418
XLOC_005960	11	86699810	86710266	+	28	54	23	65	129	42	46	24	102	42	70	45	55	25	15	103	56	35	49	58	60	35	41	39	60	10	9	56	33	18	43	22	48	13	20	35	1608
XLOC_005969	11	86918295	86923257	+	19	21	4	16	6	11	4	5	10	0	25	8	15	7	6	13	26	19	5	5	22	6	15	9	24	1	7	19	11	27	9	11	18	11	7	10	432
XLOC_005970	11	86923353	86924150	+	11	5	3	7	3	4	3	4	3	5	9	4	2	1	0	4	21	6	2	0	5	5	4	3	9	2	6	11	5	9	0	4	4	3	3	2	172
XLOC_005981	11	87897989	87942566	+	303	237	291	261	246	270	436	264	294	254	255	230	391	362	241	269	572	312	399	213	436	305	270	262	317	266	489	324	471	272	364	347	342	241	392	269	11467
XLOC_006029	11	93991386	93992329	+	15	11	7	14	15	10	9	10	26	10	17	21	14	13	14	12	13	18	9	12	9	11	10	13	16	15	11	9	15	14	13	16	16	19	15	14	486
XLOC_006030	11	94076336	94078163	+	19	17	12	17	14	12	15	12	18	19	24	9	21	25	16	12	33	19	26	13	30	12	16	20	30	19	22	15	16	29	20	22	20	14	18	21	677
XLOC_006031	11	94092978	94264483	+	841	688	727	740	645	703	1020	578	635	676	836	513	780	703	682	502	922	754	985	600	986	663	825	639	724	625	989	739	868	729	804	811	719	436	851	634	26572
XLOC_006034	11	94095697	94096906	+	14	7	5	9	11	12	18	13	11	11	18	2	13	11	12	10	14	15	8	17	14	15	8	6	19	8	21	3	9	21	12	12	14	4	16	10	423
XLOC_006042	11	95672610	95719629	+	27	20	20	17	23	27	46	22	14	11	15	19	16	28	10	11	22	32	48	16	25	14	11	16	23	17	26	13	37	40	30	35	23	9	19	12	794
XLOC_006050	11	95716863	95717478	+	2	3	1	1	4	5	9	1	1	2	4	2	2	4	1	0	6	7	5	2	1	1	0	2	2	2	7	0	7	3	4	10	1	0	3	0	105
XLOC_006072	11	97647875	97648849	+	6	4	6	2	8	4	6	4	6	11	2	2	7	9	5	5	5	5	5	6	8	6	5	6	7	4	8	2	5	11	10	6	13	4	6	8	217
XLOC_006073	11	97649228	97649802	+	6	6	2	3	4	5	6	3	3	1	4	2	12	3	1	3	5	5	4	2	1	7	6	5	7	2	7	10	2	3	2	0	7	2	4	3	148
XLOC_006075	11	97650312	97651021	+	4	0	3	6	5	5	2	2	4	4	5	5	2	5	4	1	4	6	2	0	9	7	2	5	4	9	6	3	4	2	3	8	4	1	2	4	142
XLOC_006111	11	99249914	99254253	+	8	7	2	2	5	3	3	9	2	3	4	2	3	5	4	7	15	9	11	5	10	9	4	3	3	6	6	12	5	4	7	1	7	6	5	5	202
XLOC_006117	11	99291084	99291889	+	3	1	3	3	6	1	6	6	1	2	2	1	4	7	4	1	6	5	9	5	8	3	2	3	5	2	6	0	4	3	7	3	1	0	3	3	129
XLOC_006133	11	99927343	99935365	+	3	7	4	5	3	7	12	5	3	2	7	0	8	18	4	1	13	6	6	3	8	6	4	4	12	9	11	6	10	8	10	7	7	3	10	4	236
XLOC_006149	11	100567156	100567542	+	3	4	3	1	0	0	4	3	1	2	1	5	5	4	2	7	0	2	8	5	2	4	0	2	4	3	1	7	7	2	4	2	7	3	2	1	111
XLOC_006187	11	103226149	103231444	+	121	137	64	112	121	114	86	81	99	101	102	50	96	134	93	128	139	108	101	99	186	125	102	79	69	115	131	106	115	120	118	73	135	45	103	107	3815
XLOC_006191	11	103275981	103289601	+	383	292	214	852	413	236	202	481	393	411	267	429	407	535	227	738	718	1151	241	1283	341	483	511	352	301	269	345	1605	204	279	601	377	375	1297	345	220	17778
XLOC_006203	11	103673241	103673849	+	4	3	6	2	3	6	5	9	2	4	4	4	6	2	2	2	6	5	8	11	9	3	3	7	4	0	3	8	1	7	5	7	9	3	5	4	172
XLOC_006204	11	103674052	103674984	+	0	5	6	3	11	10	7	14	4	4	11	2	5	6	9	6	5	3	7	4	7	1	6	3	6	5	8	12	7	11	3	7	13	3	10	8	232
XLOC_006209	11	103967908	103970490	+	45	69	15	61	40	48	34	47	57	37	57	20	29	31	11	51	36	21	15	49	69	29	41	23	28	40	42	24	26	49	38	46	58	16	35	31	1368
XLOC_006211	11	104052509	104053613	+	8	10	7	9	9	5	19	9	3	9	10	2	9	3	6	11	10	8	6	5	15	8	11	7	7	3	12	17	12	7	10	11	7	6	9	3	303
XLOC_006222	11	104228188	104229732	+	2	10	11	12	2	6	0	13	15	14	13	12	0	4	13	0	12	6	0	14	16	23	7	16	0	3	19	3	3	6	2	5	18	13	10	13	316
XLOC_006224	11	104230212	104231398	+	0	1	3	6	3	10	0	9	11	18	8	4	0	1	8	5	1	1	0	9	23	15	12	9	0	3	9	8	3	7	1	11	20	6	13	13	251
XLOC_006263	11	105794020	105797750	+	14	29	9	17	15	17	18	27	33	23	19	30	8	24	25	50	28	39	25	33	34	36	38	19	8	20	35	35	38	44	28	39	55	35	27	19	993
XLOC_006292	11	106152498	106159211	+	73	68	69	75	117	163	104	112	95	113	67	70	106	57	58	48	92	93	59	80	139	71	51	81	88	98	105	82	120	166	99	142	128	94	55	80	3318
XLOC_006350	11	1152978	1202132	-	165	140	137	127	104	236	166	144	159	160	222	153	203	203	167	220	380	265	259	176	272	160	172	164	188	150	227	159	289	187	211	194	205	130	208	162	6864
XLOC_006371	11	2396993	2398438	-	6	8	6	15	4	7	6	2	1	2	5	3	7	4	9	12	7	5	4	2	16	6	6	6	6	11	9	16	9	5	3	10	10	2	3	8	241
XLOC_006372	11	2398496	2401579	-	22	49	12	37	23	33	21	22	14	19	31	16	12	26	8	48	24	28	23	26	63	25	17	13	32	45	30	60	29	17	36	38	54	9	19	22	1003
XLOC_006377	11	2522267	2522904	-	3	1	5	1	1	5	1	1	1	1	0	1	5	9	4	1	6	1	0	1	5	2	1	2	4	4	2	0	6	6	1	1	0	1	0	2	85
XLOC_006391	11	3265604	3266118	-	3	0	3	9	8	3	10	1	9	1	3	0	1	1	9	4	3	4	5	3	6	3	1	0	4	1	9	1	2	1	0	9	2	0	1	8	128
XLOC_006392	11	3736277	3737508	-	7	4	7	6	4	7	13	7	3	5	8	6	3	5	4	2	12	11	7	5	14	8	5	5	3	8	9	5	7	13	10	9	6	2	12	9	251
XLOC_006393	11	3738159	3739396	-	8	6	4	4	5	7	10	8	6	8	9	2	8	5	5	6	8	10	1	5	13	2	11	5	6	6	9	4	3	8	8	4	16	9	11	4	244
XLOC_006395	11	3740408	3741029	-	2	2	1	3	2	2	3	4	4	5	2	1	5	0	3	1	2	5	4	0	11	2	3	1	3	4	5	3	2	5	7	5	3	1	0	9	115
XLOC_006402	11	3928909	3930408	-	3	1	4	4	5	4	2	4	5	4	2	2	1	12	4	4	8	5	3	1	3	3	1	1	5	12	1	2	8	10	13	7	6	0	2	3	155
XLOC_006422	11	5430670	5432454	-	7	6	20	4	20	7	7	5	2	10	6	1	9	11	8	7	10	6	2	8	12	8	5	5	9	13	15	6	8	12	6	6	10	13	8	4	296
XLOC_006438	11	6811153	6812322	-	46	23	28	31	24	24	44	23	25	22	39	26	37	19	21	27	23	30	49	17	33	28	34	37	34	15	20	37	26	13	39	32	28	25	25	24	1028
XLOC_006446	11	9239054	9240906	-	113	107	123	126	116	118	79	109	122	126	85	129	158	114	111	108	119	125	87	97	164	128	132	133	134	125	125	225	121	96	139	103	154	202	120	124	4497
XLOC_006460	11	10131781	10133021	-	8	4	3	2	5	6	6	7	5	3	7	4	8	9	6	6	7	10	3	5	12	7	5	4	10	7	15	6	8	8	4	5	10	4	4	7	230
XLOC_006462	11	10141249	10142247	-	23	26	18	26	16	24	9	25	24	34	23	24	18	24	20	25	19	10	12	19	28	25	15	26	21	36	18	57	16	23	23	25	28	38	23	32	853
XLOC_006465	11	10217593	10221228	-	1	1	2	6	4	3	2	1	4	3	4	3	4	3	3	3	4	2	7	8	7	1	5	2	4	6	5	4	1	2	4	6	1	2	6	2	126
XLOC_006471	11	10673727	10674282	-	7	3	4	3	2	4	4	3	0	4	2	1	5	8	6	0	5	7	4	0	6	3	5	3	4	3	5	3	6	4	3	4	4	0	2	2	129
XLOC_006477	11	10753718	10754723	-	7	5	1	1	0	1	10	4	3	4	6	2	3	5	5	3	5	5	9	8	7	6	2	2	2	3	7	0	5	1	11	5	1	0	6	4	149
XLOC_006494	11	11229696	11233127	-	19	12	12	9	31	4	21	23	16	10	44	17	3	0	26	8	26	10	25	40	16	25	46	35	17	7	25	4	13	2	5	30	14	2	29	22	648
XLOC_006495	11	11233873	11237262	-	700	229	410	253	508	221	304	511	534	330	620	357	462	295	561	291	364	339	512	676	519	238	446	389	484	401	407	175	360	185	409	561	495	143	443	392	14524
XLOC_006523	11	14553778	14558878	-	111	82	91	110	105	81	135	94	92	106	105	41	105	79	81	71	124	82	101	91	109	99	71	91	87	115	133	53	143	102	154	77	108	21	94	94	3438
XLOC_006540	11	19324938	19325696	-	6	6	4	5	7	6	4	9	14	5	6	4	5	7	7	5	5	5	18	3	10	11	15	6	7	6	7	11	7	10	10	5	9	2	11	7	265
XLOC_006541	11	19325765	19329970	-	35	44	27	43	38	31	45	47	52	36	26	17	30	40	31	44	58	45	30	30	59	31	28	24	51	26	52	34	43	53	44	34	45	13	33	42	1361
XLOC_006542	11	19330866	19331554	-	1	6	1	1	8	1	6	1	4	1	3	1	0	0	2	4	4	4	3	2	3	4	0	1	5	3	9	3	7	2	3	7	1	1	3	0	105
XLOC_006565	11	20901168	20902705	-	4	2	1	3	20	17	1	1	6	7	15	0	5	4	2	5	5	2	3	4	2	3	6	0	10	4	0	2	5	4	0	2	4	2	2	2	155
XLOC_006568	11	20906764	20916992	-	77	93	13	104	230	173	49	104	90	101	332	19	68	98	37	76	67	41	128	75	88	99	192	47	107	80	46	45	71	90	62	97	56	14	143	35	3247
XLOC_006571	11	20922992	20924119	-	8	6	3	9	27	6	9	9	4	4	6	2	7	4	7	5	6	11	12	4	7	2	3	8	9	14	5	5	5	8	7	10	10	5	13	4	264
XLOC_006607	11	25216402	25216855	-	0	2	2	1	2	3	2	3	0	1	2	2	7	7	0	0	6	0	1	1	2	0	2	0	3	6	0	1	1	7	3	3	2	1	1	2	76
XLOC_006623	11	27190280	27191504	-	10	7	3	2	6	4	14	5	6	8	8	5	8	9	6	3	9	7	17	0	12	3	8	5	7	5	6	1	5	10	19	16	9	4	13	9	269
XLOC_006626	11	27620675	27621472	-	5	6	5	4	3	3	8	3	8	3	6	0	6	3	5	8	7	5	3	5	12	3	6	4	2	5	7	6	3	1	6	5	5	3	3	4	171
XLOC_006632	11	27931831	27932974	-	8	2	3	3	3	8	6	6	1	7	7	7	8	5	4	2	11	5	4	7	10	7	4	6	4	5	2	10	11	11	8	10	5	1	4	5	210
XLOC_006638	11	28968900	28969480	-	4	0	2	2	0	3	4	2	2	3	9	7	8	5	2	2	1	4	7	4	7	3	3	3	2	3	2	1	4	1	7	6	2	0	2	3	120
XLOC_006659	11	29432206	29432452	-	3	4	8	4	6	5	6	4	3	8	2	4	4	10	8	5	3	5	5	4	10	2	3	4	6	7	7	8	9	3	10	4	5	1	3	6	189
XLOC_006660	11	29432889	29433194	-	8	6	4	7	4	8	8	3	0	7	8	2	4	3	0	0	3	2	3	2	5	0	3	2	2	7	4	4	2	1	8	5	3	1	3	4	136
XLOC_006661	11	29433276	29433773	-	9	8	10	11	9	9	9	4	5	7	10	1	2	7	3	4	4	5	7	5	5	12	6	5	5	9	4	2	5	2	2	3	3	3	4	11	210
XLOC_006662	11	29435013	29435814	-	12	10	7	17	14	4	15	8	6	12	10	13	10	11	10	5	8	5	10	6	5	8	12	13	11	10	20	10	15	4	13	8	10	4	6	12	354
XLOC_006709	11	38551115	38551630	-	19	0	0	0	0	0	0	0	0	0	17	10	13	4	0	0	0	0	0	0	0	0	15	12	20	12	0	0	0	0	0	0	0	0	21	8	151
XLOC_006714	11	43463341	43464356	-	2	2	2	5	0	6	3	2	1	3	15	6	7	4	6	5	2	11	4	4	9	5	5	1	3	2	5	0	1	3	3	6	11	2	18	2	166
XLOC_006715	11	43464644	43465760	-	5	5	3	3	2	4	5	4	6	0	13	6	8	9	3	4	3	3	5	9	7	2	6	5	5	8	15	2	1	9	3	12	2	3	11	4	195
XLOC_006743	11	44705391	44731865	-	101	81	96	75	120	69	132	124	104	99	94	112	146	140	88	155	200	51	189	125	212	133	63	81	125	190	128	109	321	85	167	179	149	65	72	74	4454
XLOC_006744	11	44712116	44712420	-	5	3	1	3	4	1	9	7	4	2	1	0	9	5	2	2	7	4	5	6	3	2	3	3	5	8	3	3	13	4	4	8	4	1	2	5	151
XLOC_006757	11	46217007	46217836	-	5	4	6	4	4	4	3	5	7	8	11	6	4	5	7	7	6	10	8	2	6	3	5	4	4	5	3	12	4	8	3	5	4	1	2	6	191
XLOC_006768	11	47300674	47302193	-	16	7	11	2	11	3	12	6	6	9	4	12	16	9	4	9	7	8	3	14	17	4	5	9	18	6	8	15	15	23	21	15	7	14	3	8	357
XLOC_006784	11	48847693	48848651	-	8	5	5	5	3	4	2	2	1	5	3	3	2	2	5	5	14	4	8	5	6	1	3	5	5	3	5	6	12	9	7	4	6	4	1	2	170
XLOC_006795	11	49264210	49265962	-	24	20	13	20	23	22	16	12	17	20	26	14	20	36	19	24	30	25	27	12	23	29	12	9	20	17	20	16	34	34	16	14	28	7	15	11	725
XLOC_006850	11	60310581	60311491	-	3	7	1	5	3	6	2	6	3	7	6	2	2	9	6	4	10	4	5	5	12	5	6	1	3	9	5	5	6	2	6	8	7	1	5	6	183
XLOC_006852	11	60314038	60317094	-	17	10	11	14	11	16	18	17	11	27	12	13	14	13	15	25	21	15	11	16	23	2	9	14	9	11	19	14	18	15	18	16	17	7	12	13	524
XLOC_006858	11	61651143	61652550	-	7	4	4	9	7	11	7	6	9	9	18	10	8	8	8	8	18	3	18	6	18	13	15	7	7	4	17	13	8	8	22	13	9	4	12	7	355
XLOC_006876	11	62873008	62874026	-	5	7	3	9	3	2	6	4	5	2	8	1	2	2	2	13	3	0	7	2	4	0	5	4	3	2	5	1	3	2	9	6	4	1	2	9	146
XLOC_006885	11	63217933	63236259	-	193	168	142	193	172	142	193	177	142	164	309	235	286	182	167	187	142	140	208	173	241	123	187	177	325	224	191	284	157	223	281	258	230	146	267	184	7213
XLOC_006887	11	63224930	63228343	-	65	56	37	63	53	42	58	80	48	43	99	33	94	55	52	46	55	72	52	67	80	29	45	44	94	42	66	50	54	74	87	104	53	22	59	46	2119
XLOC_006924	11	68332992	68334481	-	12	8	3	3	8	11	15	8	5	11	12	1	13	4	5	10	11	13	16	8	7	13	6	3	10	6	10	1	9	10	14	5	6	2	7	16	302
XLOC_006925	11	68334562	68335162	-	3	4	0	7	2	6	7	3	2	0	6	0	2	4	1	4	4	2	8	2	4	0	3	2	7	3	2	0	4	4	4	10	5	0	3	7	125
XLOC_006960	11	71349277	71349815	-	9	4	4	6	5	20	27	8	12	13	18	20	10	8	10	7	29	18	39	5	8	10	7	9	16	8	8	8	22	10	11	9	14	5	8	9	434
XLOC_006967	11	71985221	71985744	-	4	7	2	3	5	2	3	1	1	6	6	3	6	9	4	0	8	3	4	3	7	7	10	2	4	4	4	2	3	5	4	2	4	0	3	7	148
XLOC_006972	11	72147396	72150019	-	20	9	2	9	9	26	12	7	19	12	14	13	25	20	8	6	36	23	13	18	14	13	12	10	13	15	20	3	27	28	14	20	9	4	11	6	520
XLOC_007000	11	72788761	72790747	-	6	13	3	5	6	12	12	5	10	7	14	8	15	11	8	10	17	21	21	8	29	9	9	5	7	12	18	9	22	14	7	12	22	14	13	9	423
XLOC_007012	11	73691558	73692868	-	6	5	4	3	6	10	6	9	5	8	14	11	6	4	6	12	10	14	12	9	11	2	9	3	9	4	3	5	14	16	7	17	9	5	6	5	285
XLOC_007013	11	73932440	73935116	-	3	5	3	4	11	3	4	3	5	6	8	2	2	5	4	7	18	5	4	3	7	5	3	3	0	0	11	0	25	4	7	3	4	1	8	4	190
XLOC_007016	11	73938228	73939233	-	1	2	4	4	9	1	3	0	5	3	10	5	3	4	5	1	11	4	8	2	5	5	4	5	2	2	6	4	23	5	5	8	5	2	6	3	175
XLOC_007040	11	78262458	78264713	-	13	5	15	2	10	8	20	14	10	7	12	11	30	6	6	4	13	8	19	4	26	8	8	8	17	8	28	5	12	5	28	7	23	10	15	9	434
XLOC_007052	11	78963502	78969076	-	78	72	71	78	90	79	118	90	70	86	109	100	101	71	89	86	92	84	111	106	115	78	88	99	97	91	154	107	111	104	126	114	91	64	106	96	3422
XLOC_007074	11	83455008	83455475	-	3	2	2	3	1	2	1	9	1	4	3	6	2	1	4	2	0	2	6	3	1	0	3	3	1	4	3	3	0	5	6	9	2	1	6	4	108
XLOC_007077	11	83457287	83463736	-	1	2	8	3	4	11	16	11	11	9	5	7	5	8	4	5	4	7	20	12	3	9	4	4	6	2	7	4	4	9	6	21	9	3	10	8	262
XLOC_007084	11	85234245	85235036	-	3	4	10	5	5	3	9	8	5	4	5	2	6	5	6	4	4	7	8	4	14	12	6	1	3	8	6	6	4	10	8	13	5	3	3	2	211
XLOC_007104	11	86926315	86926896	-	4	4	2	2	7	2	1	8	1	1	8	0	1	1	2	2	1	2	4	5	6	3	5	4	4	1	9	5	6	1	2	8	2	0	3	0	117
XLOC_007125	11	88584719	88589719	-	253	248	196	306	189	398	371	386	291	252	284	269	269	331	258	352	436	363	367	326	390	236	204	271	211	213	288	380	476	351	449	405	377	246	166	301	11109
XLOC_007136	11	92952995	92953750	-	4	3	0	8	2	3	8	2	7	1	5	2	8	9	2	3	9	7	7	9	9	4	7	4	5	3	5	2	7	3	7	4	2	2	5	2	170
XLOC_007169	11	94003815	94004396	-	5	1	3	0	6	4	3	1	4	2	2	2	3	7	1	3	1	6	1	1	5	1	1	1	3	4	8	0	3	3	5	6	3	0	3	1	103
XLOC_007174	11	94085650	94086209	-	2	1	2	3	3	5	6	2	5	1	2	2	5	4	2	0	7	7	7	4	3	3	1	1	7	4	7	9	5	4	1	2	6	1	3	3	130
XLOC_007175	11	94087089	94087853	-	0	2	5	4	3	2	2	1	1	1	0	2	1	3	5	3	11	3	4	5	2	4	0	1	5	5	0	2	6	2	2	2	1	0	0	1	91
XLOC_007194	11	95858405	95859775	-	13	13	11	15	11	13	7	22	22	12	7	10	21	10	13	9	13	15	17	11	12	15	13	14	17	11	15	15	11	17	23	23	19	16	16	13	515
XLOC_007210	11	98152877	98161274	-	201	143	146	146	156	188	164	167	130	128	176	124	157	129	149	133	237	211	109	187	228	106	163	163	133	145	174	157	176	169	196	178	188	66	144	114	5681
XLOC_007213	11	98217572	98219112	-	12	5	9	9	9	10	11	7	14	18	18	9	18	2	6	4	12	8	11	5	11	12	5	5	9	9	14	5	3	23	13	17	9	3	9	5	349
XLOC_007214	11	98219716	98220333	-	3	1	4	2	2	3	3	5	11	5	3	6	5	0	3	2	2	4	3	5	8	4	2	3	4	2	5	5	6	9	3	3	6	3	1	2	138
XLOC_007246	11	98975128	98978546	-	105	82	68	106	75	91	121	125	88	96	120	44	94	81	85	75	134	93	108	128	147	72	98	80	117	55	120	55	109	125	118	158	98	32	103	104	3510
XLOC_007274	11	100901817	100903193	-	8	7	13	11	5	8	8	6	7	12	10	5	9	8	5	12	11	12	11	8	20	5	9	10	14	12	12	18	16	15	11	15	8	10	10	14	375
XLOC_007304	11	102479189	102479987	-	6	2	4	3	4	2	4	3	2	3	3	2	2	3	3	3	7	1	6	5	7	1	8	5	2	4	6	7	3	3	10	3	2	3	5	3	140
XLOC_007305	11	102480115	102483441	-	16	9	10	11	9	12	21	11	3	5	12	7	13	14	13	9	21	3	10	6	16	9	14	6	9	16	10	6	16	13	25	27	11	2	22	16	433
XLOC_007311	11	103113851	103114884	-	2	6	2	3	3	5	3	5	7	8	8	3	7	12	2	11	8	7	9	3	3	5	7	3	1	1	6	8	10	6	4	10	9	1	3	8	199
XLOC_007319	11	103305820	103306662	-	84	53	94	79	382	200	42	95	81	110	66	112	85	53	63	84	61	112	59	120	1352	83	78	152	75	91	93	128	45	309	168	95	81	1473	71	91	6420
XLOC_007349	11	104164255	104164666	-	3	1	2	2	0	1	3	2	1	0	4	3	5	2	4	6	7	1	6	0	8	0	2	2	6	1	3	2	8	1	10	1	3	2	5	1	108
XLOC_007352	11	104181960	104185644	-	2479	1521	1964	1866	1967	1524	4037	3116	1974	2243	3436	3709	3198	2539	1732	2722	4179	1557	5501	2777	2703	1661	3033	1799	2921	2288	2323	3160	3709	1846	4014	3438	2535	2861	3357	1946	97635
XLOC_007358	11	104209324	104210889	-	6	2	3	4	5	5	2	5	8	2	8	1	4	8	3	3	8	6	7	8	10	5	4	6	4	9	10	6	11	7	6	6	8	6	5	5	206
XLOC_007381	11	104918898	104919704	-	3	5	1	2	2	4	3	4	1	1	5	1	7	8	2	8	5	2	5	2	3	1	0	2	5	0	2	1	4	2	2	7	6	0	0	6	112
XLOC_007410	11	105876054	105876730	-	8	3	1	4	6	5	1	3	3	7	4	2	6	2	1	9	3	1	4	6	6	3	3	3	5	2	2	4	8	1	1	4	3	3	2	2	131
XLOC_007411	11	105881053	105881435	-	45	40	29	66	18	35	38	43	28	24	36	46	65	21	21	55	38	18	38	23	80	25	30	29	38	42	72	107	51	33	43	43	40	43	31	44	1478
XLOC_007427	11	106177135	106178444	-	3	3	4	4	3	1	7	4	4	6	9	8	6	7	7	5	6	3	5	5	10	18	7	4	4	8	7	5	4	5	7	7	11	3	0	4	204
XLOC_007457	11	107088223	107088690	-	12	7	8	9	13	7	9	16	9	3	9	15	17	15	8	7	11	10	16	4	9	6	3	5	17	12	9	3	10	8	10	10	17	8	10	2	344
XLOC_007458	11	107113439	107115727	-	12	5	11	9	9	19	13	12	20	9	14	3	6	12	12	5	11	17	5	19	32	12	13	16	16	8	9	6	16	23	32	13	21	3	13	14	470
XLOC_007470	11	107301246	107301760	-	8	21	10	10	31	7	13	40	22	10	18	5	8	19	5	19	37	8	15	27	33	18	14	7	5	12	22	14	57	7	14	44	31	15	10	7	643
XLOC_007471	11	107308640	107309116	-	9	14	12	16	35	10	9	37	28	10	20	4	17	14	11	17	49	7	20	28	44	28	23	6	16	12	19	30	82	13	20	57	32	31	18	7	805
XLOC_007498	12	11172462	11174975	+	8	16	12	17	10	10	20	13	15	7	15	5	15	7	5	7	22	11	27	17	19	11	11	14	10	11	13	13	17	18	23	25	17	2	3	5	471
XLOC_007541	12	15621336	15622408	+	3	7	2	4	3	5	14	7	6	7	6	3	8	3	5	0	5	4	4	4	7	2	3	2	5	13	6	5	8	4	13	6	5	0	4	5	188
XLOC_007554	12	17978412	17979371	+	3	3	1	1	7	3	9	1	3	2	3	6	3	10	5	4	4	2	6	6	7	6	1	9	5	6	3	5	4	3	3	6	10	3	4	8	165
XLOC_007564	12	18168837	18169393	+	2	1	3	3	2	6	9	4	2	0	4	1	3	3	1	0	7	6	6	1	2	0	2	0	5	6	2	0	3	2	3	5	4	2	0	3	103
XLOC_007575	12	18181817	18182816	+	1	2	1	3	1	1	9	9	4	2	1	0	4	4	2	1	8	2	13	5	2	1	2	2	5	1	4	0	9	2	5	1	1	0	1	4	113
XLOC_007577	12	18183838	18184381	+	6	1	5	2	1	2	4	4	2	4	3	0	3	7	5	4	4	4	8	4	2	4	1	8	4	2	3	0	2	3	2	0	1	0	2	1	108
XLOC_007588	12	19283334	19284074	+	2	2	2	2	4	0	1	3	0	1	0	1	3	0	2	2	1	0	2	2	3	0	1	1	2	0	6	5	4	2	8	5	6	3	7	7	90
XLOC_007593	12	19621114	19666367	+	40	35	67	49	29	46	80	35	52	44	18	7	53	20	76	14	40	38	30	53	83	47	29	55	66	38	116	60	21	28	67	64	64	7	39	59	1669
XLOC_007597	12	19669550	19670188	+	8	10	9	5	9	5	9	5	4	11	4	3	11	5	9	0	7	11	2	5	18	5	8	14	12	5	13	1	4	3	9	6	9	3	5	10	257
XLOC_007604	12	20498986	20499716	+	2	2	2	8	4	3	2	6	5	4	6	0	3	1	5	7	5	5	11	2	2	0	1	3	2	1	1	2	3	1	3	4	4	1	1	4	116
XLOC_007610	12	20973532	20989202	+	9	12	14	5	8	14	15	12	7	12	26	11	20	10	5	12	17	17	10	5	13	16	9	10	15	4	1	22	17	14	13	21	10	11	10	8	435
XLOC_007655	12	26479525	26481859	+	27	17	11	15	23	14	23	15	20	15	12	13	22	8	13	12	11	22	15	18	25	13	11	11	24	10	8	3	8	23	8	21	12	2	18	17	540
XLOC_007663	12	27541269	28034473	+	713	432	470	446	529	496	610	515	535	494	734	279	515	449	471	564	743	477	660	536	465	479	532	396	437	348	554	422	544	388	512	572	334	272	469	358	17750
XLOC_007664	12	27638440	27641254	+	72	48	35	35	38	56	64	42	63	25	39	45	37	54	45	76	41	48	63	27	57	14	27	67	40	57	40	56	29	58	52	34	44	10	33	80	1651
XLOC_007671	12	28600244	28601000	+	1	5	3	5	9	8	4	5	4	1	6	3	2	9	5	4	6	4	1	3	6	4	1	4	2	5	8	1	2	2	4	4	4	1	4	2	142
XLOC_007673	12	28604334	28604833	+	0	4	1	2	8	5	4	6	3	4	6	6	5	4	4	10	2	4	4	7	9	8	5	4	4	5	11	4	9	2	1	8	11	2	3	2	177
XLOC_007679	12	29204142	29205470	+	9	5	6	2	2	7	11	7	5	3	6	6	0	4	6	4	3	3	8	3	8	5	6	4	3	1	11	8	8	6	6	5	6	4	6	3	190
XLOC_007688	12	30243463	30244485	+	3	5	3	5	7	3	8	6	6	5	6	5	10	1	3	7	5	5	5	3	2	2	4	5	6	2	5	2	9	6	10	4	9	3	6	3	179
XLOC_007698	12	30511873	30512938	+	4	5	1	1	2	2	3	0	4	4	2	1	2	3	3	6	0	4	14	3	4	1	1	2	0	9	7	3	2	3	7	7	6	0	1	5	122
XLOC_007711	12	31504520	31505751	+	6	5	1	5	2	3	3	5	5	5	6	2	3	2	6	6	13	5	3	3	8	7	3	7	5	6	12	2	3	9	9	4	4	0	5	3	176
XLOC_007715	12	31509248	31510302	+	4	5	5	5	7	9	2	7	3	11	9	3	7	6	3	6	11	2	4	7	8	12	3	11	3	4	11	3	7	6	9	6	8	2	12	11	232
XLOC_007731	12	33439128	33439950	+	12	8	2	5	3	4	9	11	5	8	5	9	11	5	5	5	1	2	9	7	7	10	5	5	5	8	9	15	3	7	5	6	5	11	8	3	238
XLOC_007749	12	35870729	35871622	+	6	7	4	4	6	7	6	5	3	3	6	9	10	3	4	4	3	8	6	3	4	3	4	3	2	3	7	1	3	10	10	7	3	3	3	4	177
XLOC_007770	12	36529631	36608102	+	1014	792	873	840	975	873	1428	1097	956	948	1040	737	1079	797	1092	794	1238	925	1171	917	1196	996	817	897	1102	876	1336	833	1164	1101	1299	1146	1012	472	890	980	35703
XLOC_007792	12	51332364	51333439	+	0	2	3	5	3	3	0	5	0	0	6	3	1	0	4	10	16	11	3	3	3	1	4	3	1	1	3	3	7	4	1	7	2	1	1	0	120
XLOC_007817	12	52464911	52465706	+	4	2	3	5	4	7	3	2	6	1	4	1	4	4	1	0	4	4	10	4	4	2	4	2	2	8	4	4	6	6	6	4	5	0	5	7	142
XLOC_007825	12	54854849	54855716	+	10	1	4	5	9	8	4	10	14	2	6	2	6	7	5	2	9	3	6	7	4	5	1	6	5	3	6	4	4	14	5	7	2	2	9	6	203
XLOC_007826	12	54855785	54859260	+	20	25	13	19	27	34	30	30	23	30	18	8	19	30	21	22	44	31	24	24	28	32	15	29	32	23	27	34	23	54	27	29	23	16	24	31	939
XLOC_007829	12	54865791	54866495	+	3	1	4	2	8	5	2	1	3	3	2	1	4	1	1	2	2	6	6	1	2	4	1	4	3	0	1	0	4	5	0	7	1	2	0	2	94
XLOC_007836	12	54874721	54875849	+	7	3	6	2	5	3	3	10	5	3	6	6	7	4	2	9	4	7	3	4	4	0	3	7	11	10	4	13	11	7	11	8	4	2	4	6	204
XLOC_007840	12	54885129	54895977	+	6	4	2	4	2	5	5	5	1	4	4	3	3	4	2	1	3	3	0	3	5	2	0	3	6	3	5	6	4	13	2	4	1	5	2	3	128
XLOC_007849	12	55691187	55874762	+	15	22	11	21	23	22	50	16	20	16	28	16	30	14	29	9	42	26	24	11	24	46	18	18	26	13	18	5	25	24	36	20	21	11	19	17	786
XLOC_007856	12	55773198	55774275	+	2	0	0	0	3	4	17	1	1	5	5	1	4	6	0	0	1	6	5	3	4	5	3	0	9	3	0	0	0	11	5	3	6	2	4	1	120
XLOC_007858	12	55775974	55776851	+	4	0	0	0	0	6	6	4	5	3	8	1	7	10	0	0	0	8	6	0	18	3	6	0	14	4	0	0	0	9	7	4	7	2	3	0	145
XLOC_007929	12	69712468	69714871	+	9	18	9	21	15	10	18	25	11	12	11	11	11	17	14	12	13	8	8	16	15	9	21	18	9	11	22	15	20	19	19	19	7	2	13	20	508
XLOC_007932	12	71520883	71521422	+	1	28	2	37	1	5	17	1	10	7	8	9	1	3	6	46	3	4	17	0	10	2	7	6	0	1	2	55	2	0	5	3	22	5	13	10	349
XLOC_007933	12	71846709	71870626	+	0	71	33	80	6	85	22	81	11	20	5	19	1	18	36	71	17	100	31	65	14	20	13	41	1	8	28	79	22	101	32	82	18	10	8	42	1291
XLOC_007937	12	72245198	72247762	+	1	15	8	6	0	53	17	11	143	13	68	17	2	1	13	16	2	57	16	7	118	10	66	14	2	3	5	2	0	62	10	9	137	3	63	20	990
XLOC_007945	12	74173237	74174541	+	0	33	11	33	0	72	17	33	0	14	0	14	0	0	12	29	0	62	11	55	0	13	0	24	0	0	10	49	2	42	12	44	0	12	0	21	625
XLOC_007946	12	74174617	74174893	+	0	5	2	2	0	15	9	1	0	1	0	1	0	0	3	4	0	10	0	8	0	2	0	2	0	1	2	3	0	10	7	5	0	1	0	1	95
XLOC_007947	12	74184100	74227978	+	13	0	228	0	447	0	18	5	1	40	4	1	9	200	318	0	316	0	6	4	0	40	3	0	14	313	327	0	213	1	17	2	0	12	2	0	2554
XLOC_007955	12	74314473	74314852	+	0	5	2	1	0	14	3	1	1	2	0	2	0	1	3	2	0	16	3	2	1	1	1	5	0	1	2	3	1	19	2	9	1	2	0	11	117
XLOC_007957	12	74315720	74316398	+	0	5	7	4	2	31	5	11	0	6	4	9	0	2	8	4	0	48	6	8	15	4	0	12	0	1	5	6	0	47	7	18	7	3	2	11	298
XLOC_007958	12	74316957	74317222	+	0	2	4	2	0	20	4	3	2	4	0	6	0	2	4	2	1	19	4	2	9	4	0	11	0	2	4	11	0	24	5	8	5	2	5	5	176
XLOC_007965	12	74705439	74714583	+	5	61	220	88	11	175	260	35	25	233	16	252	1	21	234	38	27	222	234	44	69	195	26	355	1	11	295	85	50	212	235	84	43	104	25	394	4386
XLOC_007969	12	75457897	76444607	+	247	290	233	292	249	275	275	97	309	203	139	200	168	149	325	174	497	313	314	87	522	184	189	298	113	120	342	330	461	238	253	223	434	97	235	309	9184
XLOC_007970	12	75555562	75555776	+	0	0	3	0	0	0	3	0	0	5	0	12	0	0	3	0	0	0	7	0	0	5	0	13	0	0	3	0	0	0	8	0	0	1	0	14	77
XLOC_007971	12	75584085	75584286	+	0	0	9	0	0	0	13	0	0	11	0	39	0	0	17	2	0	0	8	2	0	15	1	24	0	0	10	0	0	0	14	1	0	8	0	38	212
XLOC_007972	12	75633138	75634171	+	0	14	80	20	26	76	33	9	2	26	9	38	0	43	78	3	40	90	51	17	4	24	9	47	1	37	94	23	50	54	38	15	7	19	2	65	1144
XLOC_007975	12	75990716	76011080	+	372	274	25	291	221	42	37	38	131	22	53	1	197	93	51	202	501	70	64	20	274	7	66	0	178	41	33	477	590	54	30	111	244	14	106	0	4930
XLOC_007976	12	76019480	76019724	+	0	3	0	5	0	5	1	3	11	0	4	0	0	2	1	0	1	7	1	0	10	0	4	0	1	1	1	5	5	7	1	2	12	0	1	0	94
XLOC_007977	12	76211131	76305034	+	55	53	5	47	37	15	4	18	58	2	20	0	23	10	19	40	62	23	8	5	66	0	38	0	16	8	12	54	51	20	5	21	59	1	30	0	885
XLOC_007988	12	77029256	77030512	+	2	9	9	7	14	6	4	5	3	10	6	2	9	2	5	5	14	1	8	8	1	11	3	9	6	3	7	5	1	9	4	5	1	2	2	4	202
XLOC_007989	12	77030680	77031219	+	2	0	5	1	6	5	1	7	2	3	3	0	0	6	1	4	3	2	4	1	3	4	4	5	6	7	4	4	0	2	1	1	1	0	2	1	101
XLOC_007990	12	77031321	77031970	+	2	5	4	6	2	3	3	3	5	3	6	0	3	3	1	0	3	5	0	3	5	3	4	6	3	1	5	0	1	2	4	6	6	1	1	3	111
XLOC_008012	12	80641037	80642091	+	3	6	7	5	1	6	3	2	11	3	2	8	1	7	2	4	7	5	5	2	13	6	4	6	5	5	4	5	10	12	3	4	4	6	3	2	182
XLOC_008014	12	80647993	80649095	+	7	3	5	3	9	4	3	2	9	3	12	4	4	7	5	5	3	3	6	4	8	8	4	2	3	4	4	2	10	5	8	8	2	1	2	6	178
XLOC_008015	12	80649158	80650271	+	4	8	0	5	4	6	11	1	7	11	6	3	5	4	3	4	8	5	5	3	12	6	9	7	9	5	4	3	6	10	8	10	2	7	3	7	211
XLOC_008025	12	81175472	81176271	+	3	1	3	4	6	1	2	3	3	2	3	2	3	6	4	2	9	6	6	4	4	1	6	3	4	5	6	4	3	2	6	2	4	1	7	0	131
XLOC_008048	12	86332330	86333343	+	4	6	3	3	4	4	7	2	2	5	6	3	7	5	3	3	4	3	6	1	8	3	4	5	5	3	5	2	5	1	4	9	2	2	1	2	142
XLOC_008051	12	86334852	86335635	+	3	1	3	0	6	3	1	2	2	1	5	2	2	6	4	2	6	7	6	4	5	2	11	3	7	1	8	2	5	1	6	1	4	1	2	3	128
XLOC_008054	12	87613925	87635513	+	470	378	409	370	347	349	423	295	415	404	306	232	391	412	388	306	628	345	445	327	473	374	322	327	414	353	535	459	477	369	520	388	455	274	364	385	14129
XLOC_008057	12	88671233	88671766	+	4	1	1	2	2	4	2	0	3	5	2	6	2	2	1	2	3	2	1	0	1	5	6	0	1	5	4	4	3	5	1	0	2	1	1	0	84
XLOC_008058	12	88672308	88673020	+	1	7	2	1	6	2	1	2	5	1	3	2	4	6	4	5	7	5	3	3	6	3	5	1	1	1	1	1	0	3	0	2	1	2	2	1	100
XLOC_008069	12	89338297	89338560	+	0	1	3	5	2	5	2	3	2	4	0	5	3	6	4	6	4	1	3	2	4	2	0	2	2	4	2	2	9	3	3	7	7	2	3	5	118
XLOC_008090	12	90642242	90644350	+	18	7	16	11	18	5	9	6	13	6	17	8	11	11	17	10	21	10	5	14	29	11	16	7	12	12	12	14	12	9	13	10	19	5	13	7	434
XLOC_008091	12	90644411	90646253	+	23	11	14	9	17	7	15	13	17	11	14	4	9	12	23	7	18	5	14	9	35	4	16	11	8	9	22	16	10	14	14	9	24	9	12	10	475
XLOC_008130	12	5439254	5439497	-	12	8	9	8	20	4	2	8	9	11	19	15	21	8	7	14	9	7	12	6	6	15	5	20	12	19	16	28	13	9	4	13	18	21	24	11	443
XLOC_008162	12	14748898	14749808	-	5	8	0	4	2	2	4	6	3	0	5	2	6	4	5	3	6	4	3	5	6	9	5	0	3	3	6	5	4	3	10	8	9	1	4	7	160
XLOC_008163	12	14813528	14816870	-	21	17	16	25	30	22	56	25	16	21	27	20	26	29	26	17	35	31	37	29	55	28	31	30	32	37	55	23	36	29	62	57	59	16	46	28	1150
XLOC_008167	12	15158773	15160008	-	5	5	7	8	8	5	8	0	1	7	8	3	11	4	9	3	11	7	8	11	10	10	4	8	8	5	9	9	6	3	9	8	6	6	6	6	242
XLOC_008169	12	15161342	15161971	-	4	2	1	3	1	1	3	4	4	1	3	1	0	1	7	6	9	6	2	4	3	4	1	3	0	5	9	6	7	7	4	2	0	2	3	2	121
XLOC_008182	12	16251771	16252470	-	2	0	1	1	7	2	2	8	2	2	6	2	1	6	2	1	1	0	2	4	3	0	1	4	6	2	3	1	10	8	9	9	2	1	0	1	112
XLOC_008203	12	18003894	18010049	-	67	34	27	50	48	52	35	58	43	39	48	23	35	56	30	42	86	51	65	56	38	31	27	42	39	32	38	18	44	56	43	51	31	5	28	36	1504
XLOC_008204	12	18011412	18012549	-	2	4	3	2	6	7	0	3	1	3	0	2	3	5	4	2	13	3	8	3	5	4	2	7	6	12	5	2	6	2	3	3	1	1	0	11	144
XLOC_008211	12	18183624	18196131	-	5	1	3	2	0	2	6	6	2	2	0	3	8	0	1	2	5	4	4	6	5	3	1	5	6	5	6	6	7	7	3	4	2	1	2	2	127
XLOC_008218	12	18821752	18822435	-	7	3	6	0	2	4	6	6	4	0	6	4	7	3	7	6	8	0	5	5	2	0	5	3	1	3	4	3	5	4	0	5	2	1	6	2	135
XLOC_008220	12	18823749	18824338	-	17	3	3	5	1	4	1	1	1	1	1	2	5	3	2	6	5	1	5	4	3	1	5	2	2	2	1	5	2	5	5	8	3	1	5	4	125
XLOC_008223	12	19178038	19184122	-	124	142	73	99	142	120	124	123	134	149	153	54	137	94	96	93	171	123	119	135	239	81	146	131	120	92	152	115	184	145	137	127	163	41	118	128	4524
XLOC_008224	12	19186726	19188468	-	13	13	2	7	14	7	12	8	7	7	7	6	4	12	14	9	21	12	8	10	11	21	12	6	14	10	12	13	18	14	7	9	6	4	11	16	377
XLOC_008236	12	19491135	19524363	-	182	159	130	152	138	165	236	160	139	172	146	162	214	201	126	183	172	197	213	126	227	153	122	145	195	165	213	173	235	231	213	185	238	133	179	143	6323
XLOC_008238	12	19515067	19516727	-	23	13	14	14	12	14	17	19	9	9	17	6	20	22	8	9	18	17	14	17	14	29	7	12	8	14	11	13	18	25	14	20	16	8	15	16	532
XLOC_008241	12	19521421	19522559	-	6	7	2	7	9	7	8	8	11	7	5	6	7	8	7	3	7	16	5	5	17	3	6	7	6	12	12	7	7	16	7	17	5	2	5	5	275
XLOC_008242	12	19536803	19542882	-	111	77	61	82	109	160	112	139	111	143	193	80	139	112	73	114	212	146	172	94	113	168	115	102	108	86	125	61	221	192	142	153	118	52	112	112	4420
XLOC_008243	12	19543282	19582577	-	60	49	26	40	44	57	70	69	63	50	75	34	49	52	38	52	102	77	90	42	60	56	33	59	62	55	74	35	115	68	78	60	57	25	47	62	2085
XLOC_008246	12	19582629	19586247	-	17	13	13	12	32	20	23	13	20	19	21	8	21	28	19	23	44	22	26	11	19	19	12	12	32	25	35	24	30	39	22	26	21	7	10	20	758
XLOC_008251	12	19591984	19594637	-	112	86	89	64	94	64	139	101	97	95	76	64	115	120	81	90	179	95	159	75	131	67	61	70	90	118	126	97	182	94	157	101	123	57	97	89	3655
XLOC_008264	12	20250773	20252218	-	16	6	14	3	18	18	9	13	7	5	7	12	17	5	7	8	7	14	23	21	7	11	9	5	17	2	4	8	8	8	8	22	4	17	1	9	370
XLOC_008268	12	20307427	20318966	-	7	2	8	4	4	8	7	12	2	4	7	8	9	2	1	9	9	6	9	9	1	0	2	1	6	3	4	4	7	4	4	9	4	2	3	2	183
XLOC_008291	12	23684990	23685908	-	199	163	225	193	173	164	255	137	178	188	154	143	178	120	185	87	184	135	140	191	166	203	184	171	193	168	266	192	164	149	264	194	231	195	228	221	6581
XLOC_008292	12	23689504	23690276	-	1	0	2	3	3	2	4	1	6	3	6	3	0	0	1	1	1	5	3	3	5	1	8	3	0	0	3	0	9	6	1	1	1	0	6	2	94
XLOC_008301	12	23704719	23717473	-	205	198	227	205	189	180	242	162	178	198	155	131	220	150	204	101	180	118	151	199	244	197	197	182	233	123	331	217	167	153	228	207	200	129	212	239	6852
XLOC_008318	12	26450624	26451091	-	7	0	5	0	10	5	0	6	1	6	0	0	5	1	7	1	6	2	2	3	1	1	1	3	4	6	9	1	4	4	7	2	8	0	1	10	129
XLOC_008323	12	28323560	28325365	-	14	8	8	6	7	16	10	13	10	9	10	11	16	12	15	8	14	11	11	8	20	16	7	3	10	9	14	6	16	10	12	10	19	7	21	11	408
XLOC_008325	12	28326308	28327609	-	10	5	10	3	11	9	11	8	5	2	3	2	8	10	10	5	13	8	6	9	12	1	6	8	13	4	10	7	11	5	3	7	5	2	6	3	251
XLOC_008363	12	32702824	32703849	-	7	9	5	3	3	8	8	4	8	10	3	3	2	2	4	5	5	11	1	4	7	2	5	3	2	4	2	2	3	3	7	9	3	5	1	1	164
XLOC_008411	12	35944530	35958043	-	9	5	5	8	8	6	8	13	11	13	8	6	7	10	9	3	6	13	11	5	6	9	2	4	3	7	13	9	7	9	5	13	6	7	4	9	277
XLOC_008423	12	36326613	36336481	-	15	13	7	18	19	9	4	13	18	11	13	13	14	13	16	27	29	19	13	16	12	16	23	15	15	8	9	26	22	15	10	12	14	8	5	10	520
XLOC_008435	12	40860993	40864095	-	21	34	17	22	25	27	25	49	37	27	21	16	33	32	22	23	36	22	43	36	18	36	22	19	27	13	27	12	43	31	38	36	24	14	30	20	978
XLOC_008437	12	40864581	40865660	-	5	4	4	3	5	5	12	15	14	10	9	5	9	10	4	5	6	3	10	4	6	4	5	3	5	6	9	2	7	9	12	8	8	2	3	10	241
XLOC_008452	12	48822346	48825762	-	50	72	50	40	48	52	88	45	51	54	57	61	51	90	49	74	75	46	92	51	78	56	65	52	46	66	77	55	105	71	63	58	66	24	46	71	2195
XLOC_008462	12	50893480	50894533	-	3	4	1	9	5	7	5	4	11	2	16	8	4	9	1	8	5	10	3	2	3	5	8	9	1	6	7	9	6	11	3	7	5	0	9	6	212
XLOC_008468	12	50910640	50912959	-	7	14	5	20	6	17	17	9	12	14	11	12	13	27	7	14	26	26	19	17	14	14	18	11	14	17	23	7	15	8	23	13	19	7	16	11	523
XLOC_008469	12	50913099	50914089	-	3	7	1	5	10	3	5	1	4	6	11	2	6	4	3	5	9	3	4	3	9	4	8	5	3	6	3	1	8	2	4	6	4	1	2	5	166
XLOC_008531	12	71659991	71660615	-	0	5	1	7	0	4	0	4	0	0	1	0	0	5	1	10	1	4	1	3	0	0	2	0	0	3	5	11	5	7	0	4	1	2	4	1	92
XLOC_008539	12	72923577	72937445	-	0	5	13	7	7	23	14	5	6	17	9	12	0	13	18	8	10	29	8	7	28	6	17	18	0	9	27	7	27	27	24	12	23	4	11	23	474
XLOC_008540	12	72923985	72938869	-	1	19	35	30	26	143	72	49	61	51	61	64	2	37	59	17	46	154	60	34	170	35	75	73	2	21	73	26	42	146	74	47	121	25	94	73	2118
XLOC_008542	12	72936575	72936846	-	0	8	11	9	6	50	17	12	29	12	20	21	0	4	8	6	6	42	22	9	42	9	15	4	0	6	9	7	6	52	21	14	75	0	26	14	592
XLOC_008545	12	73268261	73269187	-	2	141	285	142	4	326	372	58	1	366	2	388	5	17	407	77	1	399	357	77	1	328	0	582	2	8	405	178	67	369	350	144	0	222	1	612	6696
XLOC_008546	12	73312694	73324592	-	0	3	30	3	0	0	74	0	0	31	0	43	0	0	80	1	0	0	108	0	1	30	0	74	0	0	46	2	0	0	63	0	0	27	0	87	703
XLOC_008547	12	73448381	73448995	-	33	69	11	49	14	54	2	26	92	1	48	0	16	17	15	47	26	62	5	28	56	0	47	0	9	29	17	89	62	44	3	59	245	0	83	0	1358
XLOC_008551	12	73750309	73750517	-	7	42	2	37	7	0	0	0	0	0	0	0	1	13	4	18	26	0	0	0	0	0	1	0	1	4	7	26	21	0	0	2	0	0	0	0	219
XLOC_008558	12	75222299	75222938	-	0	1	2	2	0	3	2	1	0	2	0	5	0	1	1	1	0	4	4	0	0	2	0	9	0	0	7	2	0	2	8	4	0	1	0	8	72
XLOC_008560	12	75564801	75565089	-	0	0	4	0	0	2	4	0	1	0	0	4	0	0	5	0	0	7	3	0	0	6	0	4	0	1	4	0	0	7	3	0	0	0	0	5	60
XLOC_008583	12	81180870	81206854	-	12	4	8	6	13	11	14	16	16	13	6	15	11	10	12	7	19	11	9	18	13	5	8	7	8	10	18	15	16	14	11	11	15	20	12	5	419
XLOC_008614	12	89244754	89245499	-	4	8	3	10	2	3	10	5	2	2	7	2	4	3	5	8	4	3	9	2	4	1	12	2	5	6	9	9	6	7	11	6	7	4	7	4	196
XLOC_008625	12	90247767	90250341	-	8	7	3	2	3	4	3	6	11	3	10	7	4	11	4	16	51	15	13	5	9	5	8	8	5	7	4	4	10	9	5	11	11	0	5	6	293
XLOC_008627	12	90252249	90274123	-	8	7	3	2	6	2	5	7	10	7	3	7	4	12	5	13	27	12	11	10	1	5	8	5	9	8	7	6	10	3	6	8	0	1	1	2	241
XLOC_008691	13	7053741	7054736	+	0	4	2	1	7	6	4	2	3	2	4	0	0	4	2	2	5	3	4	4	1	2	1	1	2	4	2	5	14	2	2	6	2	1	3	0	107
XLOC_008703	13	7757210	7757992	+	2	5	2	2	6	4	5	7	4	1	2	5	4	2	3	1	6	4	5	1	5	3	4	7	2	3	8	3	3	3	4	3	6	3	8	8	144
XLOC_008732	13	11177680	11351291	+	2	2	2	0	3	7	0	1	2	1	0	1	5	3	0	1	4	6	0	2	3	0	0	0	2	5	0	1	6	8	0	0	4	1	0	0	72
XLOC_008733	13	11222757	11223600	+	9	8	3	6	14	14	0	3	6	3	0	1	8	6	6	7	13	14	0	9	5	4	1	4	2	9	5	2	5	14	0	15	7	2	0	8	213
XLOC_008736	13	11234128	11234472	+	5	5	4	5	5	2	0	3	3	2	1	0	8	8	3	3	4	12	0	4	5	9	0	4	6	5	6	2	11	15	0	9	2	3	1	2	157
XLOC_008737	13	11234579	11234840	+	5	2	4	3	2	10	0	4	3	1	0	3	5	5	2	1	7	17	1	6	2	4	0	2	3	4	5	8	3	14	0	2	5	0	0	2	135
XLOC_008738	13	11237368	11237719	+	8	0	2	3	3	18	0	3	6	2	0	3	3	11	4	9	5	9	0	4	5	1	0	5	3	7	5	0	6	11	0	2	3	1	0	7	149
XLOC_008739	13	11239136	11239606	+	8	4	5	6	4	9	0	4	11	5	0	0	9	6	6	1	14	13	0	7	6	6	0	4	8	5	9	1	6	12	0	4	6	1	0	2	182
XLOC_008742	13	11352620	11353412	+	19	5	14	14	23	55	0	9	12	9	1	7	6	23	13	4	35	54	0	17	21	8	3	12	20	19	10	12	26	36	0	23	17	2	1	7	537
XLOC_008743	13	11353800	11354015	+	3	1	2	1	8	11	0	8	8	3	1	8	1	7	4	2	17	17	0	10	9	2	1	2	5	13	9	1	9	8	0	12	2	1	0	0	186
XLOC_008744	13	11354076	11354347	+	9	5	6	2	3	3	0	5	1	6	2	0	5	5	7	1	5	10	0	6	3	6	1	4	2	5	8	6	3	4	0	6	2	2	2	1	136
XLOC_008757	13	12626549	12835200	+	400	324	357	328	354	331	367	362	345	410	314	193	355	389	343	293	428	361	392	314	364	357	315	301	346	305	516	356	420	346	430	459	283	210	324	293	12585
XLOC_008774	13	16010453	16011095	+	2	6	5	9	3	3	3	3	3	1	3	3	3	4	4	9	3	5	4	3	8	3	3	3	1	5	5	7	4	2	3	7	5	3	4	2	144
XLOC_008783	13	16175043	16175926	+	7	2	2	4	3	4	6	5	3	2	4	1	6	5	2	4	4	4	15	2	11	4	3	2	3	0	12	8	5	6	3	4	2	1	5	1	155
XLOC_008790	13	17604124	17641353	+	54	54	26	53	71	36	95	48	48	52	49	39	69	58	42	34	269	45	89	40	102	55	58	48	72	48	92	86	131	43	58	80	70	67	91	48	2420
XLOC_008842	13	20707038	20707769	+	11	10	5	10	10	5	9	6	12	4	17	2	7	1	1	2	8	5	16	6	3	2	11	3	9	4	1	1	2	2	7	6	3	1	7	1	210
XLOC_008861	13	23031048	23238211	+	447	319	323	322	332	385	413	353	428	368	392	257	455	400	390	319	449	391	494	342	485	431	387	312	401	351	516	299	515	392	444	415	400	165	400	344	13836
XLOC_008862	13	23428893	23429385	+	4	2	1	6	1	1	1	2	6	5	2	5	3	4	3	2	4	2	0	3	9	4	0	1	2	3	1	1	2	5	3	3	1	5	1	0	98
XLOC_008863	13	23644036	23649227	+	156	101	75	120	117	142	146	147	190	106	162	159	144	97	92	131	156	119	224	119	107	122	114	82	148	94	106	122	142	161	161	142	145	83	120	86	4638
XLOC_008864	13	23705919	23706559	+	2	2	3	3	3	2	2	4	3	0	10	0	1	2	6	1	4	1	5	5	8	2	1	2	5	6	2	3	1	4	2	3	7	2	4	1	112
XLOC_008865	13	23706617	23708169	+	6	11	5	3	8	6	11	12	7	10	6	7	2	9	17	12	9	10	5	2	10	8	2	5	6	8	22	2	12	7	12	5	10	1	5	6	279
XLOC_008866	13	23708380	23709187	+	5	4	4	8	3	6	3	7	11	2	3	5	0	3	8	2	9	9	8	6	6	2	3	2	7	4	8	1	12	1	13	8	1	3	3	5	185
XLOC_008877	13	24681531	24812439	+	23	23	10	10	9	18	22	20	22	17	8	22	25	13	12	18	17	33	30	22	36	22	2	15	20	11	20	30	37	36	39	24	32	26	14	19	757
XLOC_008898	13	28170581	28171620	+	0	11	0	17	0	0	0	0	0	0	11	0	0	0	1	14	1	0	0	0	0	0	13	0	0	1	1	18	0	0	0	0	0	0	14	0	102
XLOC_008903	13	28399068	28400954	+	11	15	2	16	6	12	24	14	12	9	18	9	17	6	10	7	17	24	20	14	27	9	8	8	16	15	17	9	16	25	23	20	29	3	14	8	510
XLOC_008913	13	28626413	28643225	+	150	126	72	125	115	151	113	112	144	114	162	81	140	145	109	151	173	149	166	134	251	96	146	113	130	148	164	88	159	136	150	123	167	48	142	122	4815
XLOC_008923	13	29966833	29967448	+	1	7	7	2	1	4	5	2	7	2	0	1	2	3	3	1	5	2	4	0	9	6	5	5	2	4	4	1	5	6	7	3	3	1	5	3	128
XLOC_008925	13	30281083	30434224	+	15	7	2	1	16	17	11	11	1	3	2	3	13	3	3	5	14	20	13	13	2	1	4	1	17	3	5	4	9	9	12	8	1	0	4	5	258
XLOC_008936	13	30940103	30940767	+	6	2	4	1	0	6	4	2	5	3	6	4	1	7	5	1	9	3	5	1	2	4	5	3	2	1	4	1	7	2	3	0	4	2	3	4	122
XLOC_008939	13	30942975	30943759	+	6	3	2	4	6	4	5	0	1	7	2	5	10	5	5	0	6	4	4	2	8	3	2	3	6	4	8	2	6	3	1	4	1	2	4	3	141
XLOC_008948	13	32462343	32463158	+	2	1	3	3	4	2	5	2	0	7	2	0	5	1	3	2	11	3	6	4	3	4	4	6	10	5	4	3	7	3	7	2	3	1	2	2	132
XLOC_008963	13	33421368	33453265	+	31	30	33	41	42	54	43	33	22	60	29	24	39	26	39	36	48	59	53	27	55	36	22	31	50	32	53	34	46	72	34	49	37	25	26	23	1394
XLOC_008972	13	33447304	33448725	+	6	7	4	8	17	7	5	4	5	6	6	7	4	2	7	2	11	10	10	3	11	7	1	9	11	10	8	12	14	14	7	6	7	8	4	3	263
XLOC_008989	13	33916001	33917042	+	0	5	0	11	0	0	1	6	20	0	3	1	0	1	1	6	0	1	1	1	49	1	0	2	1	3	0	6	1	2	0	10	27	0	1	2	163
XLOC_008993	13	34261729	34264551	+	13	9	8	18	9	15	17	15	12	11	23	4	12	13	17	17	18	15	19	9	31	29	19	13	11	10	19	9	25	11	26	23	26	10	15	16	567
XLOC_009019	13	36838127	36838934	+	0	8	2	3	7	8	3	3	6	2	4	3	1	5	3	1	6	1	7	5	5	0	3	0	2	6	1	2	2	7	2	4	4	3	3	7	129
XLOC_009024	13	37290652	37292168	+	9	11	4	5	4	7	5	4	4	4	15	17	9	10	6	14	1	12	12	12	4	8	10	2	3	2	7	4	6	7	8	5	7	5	16	2	261
XLOC_009025	13	37331830	37342982	+	258	102	97	118	200	195	122	177	155	120	352	63	163	122	113	153	138	194	160	160	162	132	284	92	163	73	208	71	130	153	49	175	113	47	187	88	5289
XLOC_009026	13	37349884	37350560	+	6	2	1	4	1	10	4	4	4	2	8	1	5	0	2	8	2	3	4	3	2	2	4	2	6	2	4	1	2	3	1	0	5	2	1	1	112
XLOC_009027	13	37350766	37351438	+	3	6	2	3	2	10	1	1	4	1	4	0	6	0	0	3	0	1	3	1	1	5	4	2	4	4	5	1	2	7	0	2	1	1	1	2	93
XLOC_009033	13	38160345	38177588	+	0	0	1	0	11	9	15	11	0	10	0	0	1	11	0	0	10	7	30	10	2	6	0	0	2	15	0	1	9	8	33	31	2	10	0	1	246
XLOC_009058	13	39663200	39872504	+	427	291	379	246	268	382	536	442	367	317	338	356	432	804	407	325	1079	430	703	312	616	289	254	329	386	418	585	383	1414	439	604	543	503	357	332	369	16662
XLOC_009059	13	39721889	39722271	+	8	8	7	7	7	3	12	15	2	1	5	7	2	7	6	2	4	4	23	3	8	6	5	1	8	8	9	7	13	8	17	0	6	3	3	4	239
XLOC_009105	13	44232675	44233672	+	3	3	2	2	1	4	16	1	3	3	2	2	9	3	6	7	3	3	9	1	4	2	5	1	5	7	11	2	1	2	6	0	2	4	2	2	139
XLOC_009116	13	45552886	45555931	+	8	4	9	7	5	6	13	7	3	6	9	5	14	9	14	3	13	9	15	7	4	5	5	1	9	11	9	5	13	12	12	8	6	8	8	3	285
XLOC_009117	13	45556402	45558738	+	14	9	10	19	13	15	19	12	5	11	12	9	23	20	14	12	22	5	15	7	18	7	9	6	15	23	21	14	23	7	11	24	12	8	15	10	489
XLOC_009131	13	47794532	47795725	+	7	2	5	7	4	5	2	5	5	6	6	6	11	5	5	8	11	7	5	2	10	2	1	3	8	5	9	9	7	16	10	5	9	5	6	4	223
XLOC_009155	13	51879305	51880047	+	7	7	4	2	4	4	2	6	1	1	4	0	3	2	2	2	7	4	5	3	6	2	8	3	3	3	5	4	2	1	5	2	4	1	1	2	122
XLOC_009179	13	52988612	52991616	+	4	5	4	1	5	4	9	6	8	4	4	8	3	3	0	1	6	3	5	5	1	5	0	4	8	2	2	4	1	4	5	6	2	5	2	3	142
XLOC_009205	13	53995511	53996159	+	1	1	1	4	5	4	3	1	3	0	5	5	4	2	8	1	7	1	7	1	8	4	6	1	4	3	4	3	3	1	3	6	2	3	4	2	121
XLOC_009221	13	54427288	54429069	+	24	17	29	28	18	17	27	28	18	17	24	10	27	16	17	16	28	21	24	17	20	33	23	19	23	19	28	21	15	19	27	21	19	17	27	16	770
XLOC_009222	13	54430581	54432726	+	20	17	22	36	18	13	31	25	14	16	27	17	32	21	9	28	19	15	14	20	34	13	15	17	21	18	39	31	24	30	16	27	29	27	26	21	802
XLOC_009288	13	58070747	58072172	+	7	6	11	6	9	10	11	12	6	16	10	5	11	14	18	3	8	11	7	8	21	8	8	10	10	9	11	10	15	18	9	14	10	6	9	9	366
XLOC_009292	13	58089717	58091004	+	15	7	5	7	10	7	16	6	7	2	8	3	16	13	11	14	7	5	10	8	18	7	11	11	8	7	19	10	10	6	7	13	14	2	8	7	335
XLOC_009319	13	60234680	60235666	+	4	0	3	1	3	2	10	4	8	3	5	4	2	8	3	0	11	5	11	5	15	5	2	4	4	8	9	1	6	7	4	6	13	4	5	6	191
XLOC_009326	13	60311306	60312244	+	11	3	4	5	3	3	8	3	3	6	6	0	10	3	6	3	8	5	7	4	2	8	3	3	5	6	7	3	10	7	3	5	4	3	5	2	177
XLOC_009328	13	60316019	60317518	+	17	12	4	9	15	9	23	14	13	21	11	11	30	22	14	18	19	13	13	17	31	17	17	7	12	25	13	14	25	17	24	12	22	5	21	11	578
XLOC_009331	13	60323147	60323698	+	3	1	0	3	3	1	5	0	3	3	3	2	2	2	0	1	4	1	4	6	2	1	7	5	6	5	3	2	6	5	12	4	5	4	3	2	119
XLOC_009348	13	61110007	61111005	+	12	3	2	7	13	3	6	5	5	9	11	3	11	10	7	5	6	4	12	9	11	3	11	9	8	8	5	5	7	8	11	8	5	5	10	8	265
XLOC_009354	13	61257189	61258803	+	7	7	4	8	7	5	17	4	3	10	12	3	7	6	3	4	5	10	11	8	14	6	8	9	10	1	15	3	10	9	11	8	10	3	5	14	277
XLOC_009366	13	61743017	61743759	+	5	5	2	4	3	2	2	3	4	0	1	3	5	1	1	2	1	1	4	2	10	5	5	0	6	1	5	6	8	1	4	4	3	5	2	6	122
XLOC_009367	13	61743958	61744846	+	2	10	6	8	2	2	1	4	5	3	6	4	3	3	6	11	5	1	8	3	11	4	9	3	4	9	9	9	3	1	7	6	8	8	4	10	198
XLOC_009401	13	63403865	63410159	+	76	64	50	65	68	69	64	62	97	72	113	59	79	73	68	65	96	93	78	52	126	58	66	61	62	61	85	63	86	97	82	100	89	38	92	70	2699
XLOC_009419	13	64613591	64614975	+	27	21	25	16	11	25	33	30	25	17	25	6	30	13	24	21	17	29	15	25	37	17	19	7	15	6	25	27	13	23	28	31	21	8	20	11	743
XLOC_009440	13	65412304	65413167	+	7	9	2	6	2	3	5	9	6	4	7	3	5	5	4	4	3	6	6	7	5	2	9	4	2	0	11	1	3	6	4	6	5	3	7	0	171
XLOC_009455	13	66041477	66042735	+	2	10	4	11	9	6	15	4	9	6	6	3	3	5	5	10	7	6	8	4	6	5	8	6	2	7	8	4	5	5	17	6	11	4	7	7	241
XLOC_009456	13	66043058	66043524	+	2	4	1	2	4	1	3	3	1	3	9	1	1	1	0	1	3	4	3	4	4	5	6	3	0	3	3	3	4	6	4	0	2	7	2	0	103
XLOC_009472	13	66929937	66930546	+	3	3	2	7	3	4	4	5	4	5	6	1	3	3	0	0	2	3	7	1	8	0	2	1	1	1	3	5	3	4	3	2	2	2	2	1	106
XLOC_009473	13	66930715	66931715	+	10	5	7	9	13	8	4	9	2	2	7	4	7	6	5	10	7	9	5	6	7	6	9	4	7	7	5	4	11	5	1	4	2	2	5	7	221
XLOC_009483	13	67922887	67924091	+	6	8	3	11	3	14	4	7	2	2	11	3	4	4	3	10	16	2	8	6	11	3	2	2	9	5	5	9	18	13	10	8	7	4	4	4	241
XLOC_009486	13	68002244	68008436	+	19	34	23	33	22	30	50	20	30	29	11	24	41	27	28	41	51	41	64	34	46	31	20	13	29	41	33	68	70	41	62	39	32	31	21	19	1248
XLOC_009490	13	68023088	68116277	+	830	704	671	710	764	673	902	642	777	728	680	404	743	649	702	612	1104	717	889	671	1053	754	765	650	736	580	1018	747	835	736	868	767	829	379	826	666	26781
XLOC_009533	13	72931356	72966159	+	272	192	135	181	182	212	217	220	197	195	281	134	230	180	162	189	262	189	230	199	309	192	236	144	208	165	254	198	235	226	234	257	221	132	263	174	7507
XLOC_009566	13	74455343	74455956	+	3	1	3	7	3	2	3	5	4	5	3	6	3	4	3	8	3	4	11	4	12	3	3	6	3	5	2	8	9	3	7	2	6	1	3	6	164
XLOC_009604	13	76488517	76492143	+	15	31	24	27	31	21	30	23	16	34	20	13	30	28	36	32	30	47	53	31	29	33	37	21	17	19	49	39	31	36	47	51	27	22	19	30	1079
XLOC_009615	13	78045901	78046513	+	4	3	5	1	1	5	3	6	1	3	2	9	2	10	2	4	1	3	3	6	2	9	2	2	2	2	4	1	4	6	2	8	4	6	1	2	131
XLOC_009626	13	78804635	78807913	+	5	7	6	4	4	13	14	6	12	6	11	10	14	5	11	7	17	10	13	3	12	4	14	9	7	16	16	12	10	13	8	14	7	7	9	11	347
XLOC_009665	13	83661587	83663232	+	14	6	5	6	1	5	12	9	0	2	11	0	17	2	2	4	0	1	22	1	2	0	2	0	26	8	3	12	0	6	34	9	2	10	5	0	239
XLOC_009686	13	6742404	6743205	-	5	0	2	0	1	3	1	0	0	1	5	4	9	2	1	5	3	4	4	1	8	3	5	2	9	4	6	3	2	5	11	4	2	0	3	12	130
XLOC_009687	13	6778965	6808522	-	90	62	69	47	25	63	93	62	122	23	128	133	102	91	66	105	21	54	130	61	153	36	91	70	97	102	76	85	26	49	90	96	126	31	101	73	2849
XLOC_009720	13	12556217	12557048	-	2	5	3	2	4	4	7	3	5	0	7	1	3	4	3	1	5	1	2	5	12	5	2	2	0	6	6	4	5	2	3	9	2	0	6	4	135
XLOC_009722	13	12559867	12561606	-	13	16	5	12	3	5	11	11	11	8	8	5	9	22	9	17	7	10	9	9	14	11	9	14	5	12	12	4	12	16	11	16	10	5	10	14	375
XLOC_009723	13	12562089	12563020	-	2	3	2	7	8	1	3	3	10	9	6	1	4	2	7	4	9	3	6	11	7	10	9	7	4	7	4	1	7	4	8	5	3	1	5	5	188
XLOC_009765	13	17467888	17468918	-	3	0	2	3	6	4	4	3	1	0	9	2	4	3	0	1	4	1	8	2	5	2	2	2	1	0	3	1	3	2	6	7	0	0	3	8	105
XLOC_009768	13	17595947	17604007	-	3	2	6	4	4	2	13	10	4	11	3	1	4	2	4	3	9	4	3	2	7	5	3	1	11	6	8	4	12	8	12	9	13	7	1	3	204
XLOC_009777	13	17979214	17981066	-	12	20	4	14	14	12	17	15	12	13	21	8	19	8	10	8	13	12	14	12	14	16	14	7	11	14	10	12	8	10	22	14	19	4	3	8	444
XLOC_009795	13	20512321	20513911	-	14	4	9	9	13	14	16	8	16	14	16	1	17	11	13	8	18	12	11	7	37	10	14	11	11	9	13	12	13	10	24	18	19	8	25	6	471
XLOC_009796	13	20514357	20515974	-	2	5	0	2	1	5	2	1	2	4	0	0	3	0	4	3	7	2	5	4	4	3	4	0	5	2	7	3	9	2	6	1	2	0	4	2	106
XLOC_009824	13	22687328	22688290	-	6	5	2	0	9	0	0	0	1	1	0	1	3	2	3	1	4	1	1	2	0	0	1	5	0	13	0	3	0	0	4	0	2	3	0	2	75
XLOC_009854	13	23172766	23177406	-	46	46	34	49	47	49	60	50	39	45	43	20	51	50	53	42	68	51	66	52	71	54	37	42	57	53	68	47	72	40	52	77	47	24	37	51	1790
XLOC_009877	13	26075870	26076656	-	2	6	1	1	3	2	4	4	1	6	5	5	0	4	6	5	6	3	2	0	5	6	3	1	5	6	3	3	6	3	3	0	2	1	4	3	120
XLOC_009885	13	28285313	28285856	-	5	4	1	4	4	1	4	3	4	2	4	7	3	1	3	5	1	0	2	2	7	1	1	8	6	4	3	9	3	1	4	2	7	2	2	6	126
XLOC_009936	13	37340298	37347925	-	28	17	7	11	25	63	20	25	19	25	23	9	15	7	10	25	16	42	23	26	12	21	16	8	23	12	7	10	20	19	14	20	7	10	18	12	665
XLOC_009963	13	39199159	39200427	-	4	5	1	3	2	4	1	5	4	3	8	1	0	8	7	2	11	5	2	2	10	12	4	12	0	4	9	9	6	3	1	12	6	0	2	8	176
XLOC_009974	13	40258675	40260880	-	21	13	5	10	9	10	20	18	21	6	19	11	19	23	11	11	30	10	41	14	22	14	12	9	13	14	23	18	40	11	25	18	22	10	19	20	612
XLOC_009975	13	40261010	40261732	-	2	2	4	4	2	1	12	5	3	3	2	1	3	4	4	8	7	4	5	7	5	2	3	0	8	3	4	4	5	2	5	6	9	3	5	3	150
XLOC_009977	13	40262733	40263363	-	6	1	1	3	2	3	8	4	3	0	2	0	7	4	6	3	7	4	8	0	6	1	3	2	4	3	4	2	3	0	4	4	3	2	4	0	117
XLOC_010005	13	43332084	43398925	-	1162	746	903	822	884	810	1038	801	803	826	818	427	953	705	838	683	1264	776	910	713	1093	1003	842	716	974	674	1503	782	959	801	1068	969	859	435	1024	815	31399
XLOC_010024	13	44223030	44224063	-	3	8	2	3	7	8	10	2	3	1	5	0	4	5	4	5	4	5	4	3	11	8	3	2	8	6	7	3	8	3	10	8	9	1	7	0	180
XLOC_010026	13	44227997	44229278	-	6	5	3	4	8	8	11	1	6	4	9	3	8	6	4	4	7	9	12	1	11	1	5	4	10	5	8	5	6	11	5	17	8	0	8	6	229
XLOC_010045	13	46709658	46711468	-	4	7	5	11	7	5	20	13	2	3	3	1	1	10	5	7	7	2	24	2	0	3	3	3	3	8	1	2	5	2	9	2	2	0	1	1	184
XLOC_010049	13	46721732	46722693	-	6	3	4	6	7	2	5	7	3	6	5	2	2	16	4	5	7	2	7	5	0	4	1	4	3	7	1	0	2	0	7	5	0	2	2	2	144
XLOC_010052	13	46746676	46747783	-	20	16	9	20	13	9	18	12	4	21	17	19	17	18	8	20	16	11	31	19	18	22	8	19	14	20	18	31	13	20	20	25	14	18	8	8	594
XLOC_010069	13	47774946	47775832	-	3	0	4	3	3	5	4	2	1	7	4	2	2	1	3	5	6	4	8	3	3	3	3	3	3	1	5	6	2	2	4	3	6	4	10	4	132
XLOC_010076	13	48074344	48076543	-	3	19	8	14	10	16	28	18	9	23	21	11	10	16	12	16	18	14	18	6	39	11	17	10	25	18	17	23	28	31	28	23	26	7	18	17	628
XLOC_010086	13	50066218	50067855	-	102	114	89	95	78	77	104	89	110	83	84	43	73	86	93	94	145	55	105	81	160	101	85	85	85	89	115	87	110	83	95	77	123	67	114	91	3367
XLOC_010143	13	54106828	54108022	-	2	2	3	3	6	6	4	4	3	3	6	5	8	8	11	14	8	9	7	2	4	2	5	6	7	3	12	5	5	6	6	4	10	0	3	3	195
XLOC_010146	13	54112385	54113454	-	3	3	5	2	6	12	9	0	7	5	6	2	4	5	3	7	11	8	8	9	10	1	1	5	6	6	7	3	13	4	9	11	3	1	1	4	200
XLOC_010147	13	54113636	54114343	-	1	0	0	4	4	3	4	4	1	3	1	1	3	3	5	4	10	5	7	0	6	4	1	3	4	1	1	7	7	3	4	6	5	3	1	5	124
XLOC_010218	13	58235271	58261794	-	891	835	885	939	767	805	1078	844	902	919	854	674	874	872	888	641	1062	1007	864	814	1227	986	927	849	821	685	1091	913	1230	937	1091	1013	1107	589	933	837	32651
XLOC_010228	13	58812893	58814242	-	0	1	1	0	1	6	4	4	2	3	10	0	5	1	0	3	3	5	23	4	9	0	5	1	9	2	3	7	3	1	13	6	0	0	8	0	143
XLOC_010282	13	61241066	61243035	-	12	6	2	11	11	7	10	8	6	6	11	5	6	10	8	9	11	4	13	3	13	4	8	10	12	0	9	1	14	9	18	10	14	6	9	11	307
XLOC_010300	13	62344556	62345042	-	1	4	0	3	1	5	5	4	1	5	7	1	4	3	3	9	6	1	3	6	4	1	3	1	3	2	2	2	4	1	3	1	6	0	4	1	110
XLOC_010302	13	62348935	62349622	-	3	6	4	2	4	4	4	5	3	7	10	1	5	5	1	3	5	2	9	4	5	4	3	2	4	3	1	5	6	3	4	2	2	5	7	2	145
XLOC_010305	13	62621310	62622784	-	1	6	3	3	1	4	3	3	6	6	2	0	6	6	1	2	3	9	3	3	3	4	6	4	6	8	4	3	16	3	13	7	4	1	4	5	162
XLOC_010310	13	63338305	63339179	-	2	5	2	2	9	4	11	2	1	4	5	0	3	4	3	5	2	8	5	4	8	5	6	1	4	6	5	1	5	4	11	6	2	0	4	4	153
XLOC_010322	13	63796367	63800101	-	29	22	20	22	19	28	29	23	23	33	42	6	34	32	19	22	32	21	30	27	39	10	19	27	29	19	21	15	40	28	28	27	30	17	34	19	915
XLOC_010326	13	64255659	64256273	-	2	1	4	5	5	2	2	3	2	3	0	3	7	4	0	1	4	3	5	5	4	5	1	0	2	4	3	4	1	6	9	4	6	5	4	0	119
XLOC_010328	13	64282044	64286306	-	32	37	28	43	22	37	55	35	37	22	27	19	42	24	19	26	33	25	34	25	63	41	23	24	31	27	74	25	49	28	34	40	40	39	44	31	1235
XLOC_010334	13	64629854	64726644	-	824	692	655	619	640	717	782	576	702	683	739	361	730	673	594	740	1143	645	857	606	923	770	642	575	734	525	888	568	891	753	788	727	688	410	701	608	25169
XLOC_010339	13	64994534	64995136	-	8	2	3	2	2	1	3	4	6	3	4	0	0	2	4	2	5	2	5	1	0	3	5	4	3	2	8	3	2	3	3	3	7	5	5	7	122
XLOC_010340	13	64995380	64996327	-	2	3	4	4	9	1	4	3	1	10	3	3	4	1	3	5	11	9	9	4	3	2	4	1	4	3	5	2	9	7	4	10	4	3	11	8	173
XLOC_010341	13	64996378	64997119	-	3	7	5	0	11	3	1	2	0	3	4	3	3	2	2	3	1	2	2	4	0	1	4	3	2	0	2	3	9	3	4	3	2	2	2	2	103
XLOC_010348	13	65226546	65227501	-	8	4	5	4	6	1	5	3	5	7	3	1	14	3	3	2	10	1	3	6	2	6	3	5	9	1	10	2	12	0	4	5	7	4	2	2	168
XLOC_010374	13	67094264	67094871	-	3	4	0	1	7	3	9	3	1	1	2	2	8	2	3	4	9	4	8	6	5	4	5	5	6	9	13	10	7	4	9	6	2	3	4	4	176
XLOC_010376	13	67097194	67098440	-	13	9	4	2	3	11	8	4	7	2	4	3	7	7	5	6	17	10	7	5	10	6	3	3	13	7	9	6	17	6	14	7	4	0	6	4	249
XLOC_010381	13	67125384	67128544	-	27	37	20	27	30	18	20	24	30	20	30	11	28	18	26	30	31	39	28	25	45	30	23	26	26	27	31	23	35	33	22	26	36	10	17	20	949
XLOC_010386	13	67984377	67990908	-	26	22	24	15	13	13	40	27	25	15	15	20	41	13	25	8	24	17	35	22	30	23	24	13	34	22	24	21	21	19	41	30	25	16	25	20	828
XLOC_010425	13	72921384	72922635	-	8	5	2	3	6	5	3	5	6	4	5	5	3	6	2	5	6	6	7	9	16	7	3	7	10	4	8	5	9	11	6	8	7	3	1	6	212
XLOC_010429	13	72929526	72930468	-	7	4	7	6	4	4	5	5	2	6	3	2	8	4	3	4	6	5	9	5	5	3	7	4	6	5	4	5	11	10	4	10	3	2	7	7	192
XLOC_010430	13	72930624	72931305	-	10	2	2	2	4	3	4	4	7	5	5	5	4	5	5	2	7	1	0	3	8	3	2	5	2	4	3	0	4	2	2	6	4	2	0	4	131
XLOC_010435	13	73055667	73056642	-	1	9	7	8	4	4	1	48	8	7	3	1	4	2	2	5	2	3	0	17	17	4	0	3	4	20	10	7	4	5	6	26	6	1	2	4	255
XLOC_010440	13	73064096	73065349	-	3	9	5	9	2	6	1	32	6	5	1	0	6	4	4	3	1	2	2	16	10	5	0	2	4	11	17	3	5	5	9	33	3	1	0	4	229
XLOC_010441	13	73065732	73066120	-	1	3	2	3	1	2	2	13	1	1	0	0	3	1	1	0	0	0	0	7	1	7	0	1	1	5	8	0	3	4	6	17	0	0	1	1	96
XLOC_010443	13	73067329	73068125	-	1	13	3	3	1	4	1	19	2	11	1	0	5	1	2	4	0	0	0	7	8	2	0	0	1	5	8	5	5	5	4	10	5	2	0	0	138
XLOC_010444	13	73068384	73068881	-	0	1	3	4	1	2	1	12	3	3	1	0	1	2	1	1	1	2	0	8	6	3	0	0	2	2	2	2	0	2	0	9	3	4	0	0	82
XLOC_010449	13	73288064	73288947	-	4	5	1	6	3	2	3	3	1	3	2	0	4	8	5	0	8	4	1	6	0	4	2	2	3	3	3	1	3	6	1	1	2	2	10	6	118
XLOC_010450	13	73289801	73291101	-	1	5	4	3	4	9	2	8	1	1	6	1	3	13	4	2	3	5	2	5	0	4	3	5	5	0	9	5	5	3	0	4	2	1	2	3	133
XLOC_010480	13	74847917	74850078	-	0	2	10	5	9	0	2	48	6	6	6	7	5	11	6	3	1	4	0	21	12	4	0	4	2	12	8	5	6	1	2	18	7	6	1	1	241
XLOC_010513	13	76076664	76077575	-	0	2	1	8	3	1	2	1	6	0	5	1	2	9	5	4	5	2	3	2	2	1	4	0	5	4	12	7	4	3	3	7	5	1	5	4	129
XLOC_010526	13	77005077	77005334	-	7	7	4	0	0	0	7	5	2	1	3	1	7	3	3	2	4	1	2	3	2	0	6	4	4	1	5	1	7	3	4	6	1	1	1	1	109
XLOC_010530	13	78012620	78013624	-	1	4	0	1	9	6	5	6	6	4	4	3	4	10	3	8	6	4	4	8	4	9	8	5	10	9	3	8	2	5	6	4	8	2	8	2	189
XLOC_010541	13	78020402	78021180	-	2	5	3	3	8	5	2	5	2	1	5	3	2	3	1	1	3	1	0	1	4	2	3	3	5	4	2	5	3	4	9	3	2	0	1	2	108
XLOC_010568	13	79409292	79410828	-	0	18	1	16	0	1	0	1	1	3	1	3	0	6	4	13	4	1	0	6	6	9	0	9	0	1	7	21	6	0	3	9	7	2	6	2	167
XLOC_010571	13	79576913	79577296	-	1	6	2	3	3	4	10	4	6	7	0	1	3	7	0	6	6	1	8	1	4	1	5	3	3	1	6	1	7	1	1	3	1	1	3	7	127
XLOC_010574	13	79971110	79975499	-	64	42	35	33	48	50	80	70	46	34	58	36	66	91	66	59	123	57	127	46	99	81	39	30	48	63	54	57	89	46	99	59	86	43	60	57	2241
XLOC_010586	13	80575668	80575872	-	2	1	3	0	4	1	9	2	2	3	6	1	3	0	8	8	4	0	4	2	6	0	2	5	4	5	8	6	6	1	0	4	4	4	2	1	121
XLOC_010594	13	81283715	81284700	-	3	4	0	2	0	3	4	3	2	3	4	5	10	2	5	4	2	5	9	0	16	2	8	1	11	7	12	1	3	4	9	6	3	3	6	2	164
XLOC_010652	14	1021348	1022267	+	2	5	3	3	2	4	3	4	7	4	5	6	4	11	2	1	6	5	6	1	9	4	3	6	0	9	8	4	6	1	6	3	7	3	7	6	166
XLOC_010661	14	1563866	1601738	+	107	138	86	142	112	88	96	91	134	116	155	65	115	122	106	154	200	105	140	81	229	105	133	93	101	117	150	124	197	117	159	137	154	80	128	83	4460
XLOC_010667	14	1637066	1637642	+	7	3	1	3	2	5	5	3	3	1	0	5	7	2	3	0	1	3	4	1	7	0	3	1	5	1	5	5	2	5	5	6	6	1	2	11	124
XLOC_010689	14	1977870	1978605	+	1	4	4	6	5	1	6	2	1	5	7	0	4	3	9	3	6	2	12	3	3	2	5	2	6	4	3	4	7	3	2	2	2	2	4	1	136
XLOC_010698	14	2224004	2233723	+	510	521	420	583	530	470	645	508	495	535	612	411	731	544	477	720	1009	456	552	425	807	650	541	471	675	528	561	785	804	530	683	544	580	614	658	532	21117
XLOC_010734	14	3742720	3744163	+	11	3	3	3	3	6	5	1	6	3	5	1	10	5	7	3	11	4	7	2	10	7	7	6	8	6	8	7	22	10	2	3	8	3	6	8	220
XLOC_010765	14	9613830	9643676	+	64	10	34	12	29	75	26	29	96	25	17	29	57	120	33	41	60	86	40	49	46	42	14	23	46	34	32	12	46	54	32	21	37	4	12	28	1415
XLOC_010770	14	10303078	10322974	+	61	34	146	57	73	92	136	48	97	58	58	67	77	77	138	79	73	95	172	94	61	80	70	49	84	56	117	63	79	100	153	42	63	81	34	48	2912
XLOC_010772	14	10325719	10329441	+	91	12	23	7	10	31	46	47	50	14	22	17	64	24	29	22	23	17	61	35	41	6	10	19	43	21	30	3	22	7	49	40	24	15	8	12	995
XLOC_010788	14	16363496	16364718	+	7	10	5	11	6	4	11	5	2	2	3	7	8	7	6	7	10	1	13	1	5	4	2	6	5	6	10	14	9	3	5	7	9	4	2	1	218
XLOC_010790	14	16666326	16719741	+	955	791	785	787	755	719	839	660	914	888	853	629	918	919	839	885	1363	870	1074	710	1233	916	860	881	837	723	1212	964	948	773	957	934	970	665	987	831	31844
XLOC_010804	14	17862805	17867776	+	7	3	5	4	8	6	12	4	3	6	15	5	4	3	5	9	8	5	32	4	4	6	7	5	5	3	9	0	3	3	4	6	2	3	8	0	216
XLOC_010809	14	17958657	17960448	+	11	8	11	5	16	15	7	17	6	8	9	12	11	13	11	22	36	14	25	12	10	7	11	12	16	12	16	6	24	18	10	12	19	4	13	12	471
XLOC_010823	14	19693686	19702567	+	17	2	9	1	7	5	9	3	0	6	1	0	12	3	5	3	14	9	6	1	0	4	1	4	11	3	11	1	7	1	1	4	0	0	2	1	164
XLOC_010837	14	22717861	22720099	+	24	12	16	21	21	10	19	28	11	7	21	17	18	16	12	11	27	17	21	24	23	8	20	19	21	15	24	20	28	20	27	28	26	11	27	20	690
XLOC_010857	14	23889924	23890927	+	7	2	7	7	3	9	10	6	7	6	1	5	8	3	3	6	5	3	13	3	15	5	4	5	6	8	8	3	5	6	19	6	8	4	6	5	227
XLOC_010884	14	27940734	27945317	+	55	54	37	55	58	49	67	58	31	58	90	37	56	54	45	34	61	55	64	49	77	53	74	58	55	44	51	51	65	56	71	69	52	38	66	55	2002
XLOC_010885	14	27959378	27960820	+	7	3	1	4	4	9	3	2	3	5	8	5	9	8	3	3	7	7	11	5	14	3	8	3	4	1	1	4	6	6	3	11	3	1	8	12	195
XLOC_010910	14	29759202	29763203	+	58	57	38	38	50	48	93	53	50	72	56	53	69	66	67	45	108	67	103	35	104	64	50	52	75	72	78	65	109	85	78	52	56	52	73	61	2352
XLOC_010933	14	34040796	34345703	+	245	262	239	280	332	238	362	210	290	228	236	135	310	329	204	187	419	234	379	231	379	263	208	217	260	362	428	237	264	337	323	313	393	165	245	268	10012
XLOC_010954	14	38745224	38745634	+	8	5	3	7	4	6	11	11	6	6	5	2	3	2	4	1	7	5	4	4	6	7	4	1	4	7	8	3	6	13	7	6	6	2	6	3	193
XLOC_010967	14	39424049	39424654	+	4	1	0	6	3	3	3	7	5	6	6	4	2	3	5	4	9	3	10	1	0	2	1	4	1	0	3	2	0	5	0	5	1	1	8	3	121
XLOC_010968	14	39424873	39427110	+	15	12	2	6	15	14	14	17	6	9	11	5	12	6	9	10	29	22	29	12	5	9	8	13	9	8	13	8	6	17	18	13	5	8	10	31	436
XLOC_010971	14	39428812	39432867	+	29	13	5	7	18	32	26	16	10	21	36	17	21	20	8	19	36	34	34	10	15	26	30	20	26	15	14	7	32	41	15	10	14	3	14	14	708
XLOC_010972	14	39432972	39451993	+	64	39	16	44	41	61	63	42	48	83	93	49	42	63	35	46	122	111	109	34	52	74	55	59	35	33	28	20	72	101	75	39	25	17	53	61	2004
XLOC_010988	14	40327697	40328767	+	0	17	0	10	0	0	0	0	1	0	0	1	0	0	0	13	2	0	0	0	0	0	0	0	0	1	0	18	0	2	1	0	0	0	1	1	68
XLOC_011012	14	45862524	45863757	+	2	3	1	5	10	9	3	8	5	6	3	3	8	8	2	5	8	3	10	1	11	6	3	8	10	6	8	6	9	6	13	3	6	1	2	3	204
XLOC_011014	14	45864266	45865467	+	8	12	3	10	7	17	11	7	4	6	7	7	4	13	6	6	12	8	15	10	9	13	7	8	7	12	9	13	11	10	11	9	6	4	5	14	321
XLOC_011020	14	47555567	47555868	+	5	3	1	5	3	1	2	3	2	1	3	2	2	6	5	2	2	6	1	0	2	13	2	1	2	1	3	3	0	0	1	2	1	2	5	2	95
XLOC_011032	14	49838598	49842348	+	35	30	23	20	32	13	38	32	29	31	34	20	18	37	29	18	40	29	37	33	56	38	40	31	23	18	35	25	33	27	56	34	40	12	36	34	1116
XLOC_011047	14	51074354	51075282	+	4	4	0	2	3	4	13	6	2	3	12	0	4	3	1	5	5	3	7	3	6	1	3	7	2	1	1	2	9	0	8	4	4	1	1	2	136
XLOC_011048	14	51075380	51076429	+	4	5	0	4	8	9	4	1	2	2	10	3	1	2	0	3	7	3	8	4	5	5	6	2	3	3	2	5	10	5	9	5	5	1	10	2	158
XLOC_011063	14	58188896	58368138	+	7	9	17	8	11	15	12	11	13	5	9	11	5	3	9	8	5	15	13	17	15	13	12	8	8	9	22	13	10	15	17	14	15	6	15	5	400
XLOC_011093	14	60151448	60151889	+	10	2	2	4	1	1	4	4	4	1	5	2	2	3	1	5	4	0	5	5	8	2	2	4	1	2	4	2	4	0	0	4	6	1	7	3	115
XLOC_011094	14	60181874	60182529	+	2	143	203	154	10	173	23	142	1	19	183	6	4	8	178	158	21	177	29	147	1	26	211	6	3	7	199	248	13	129	31	157	0	25	277	7	3121
XLOC_011108	14	65074956	65111658	+	20	14	28	29	14	39	26	31	27	31	24	17	22	26	18	23	31	35	25	18	48	15	17	19	26	25	27	29	34	40	36	37	26	15	31	21	944
XLOC_011109	14	65096751	65097952	+	4	7	3	7	3	2	6	7	7	1	7	5	7	6	8	7	5	8	6	2	9	6	5	4	11	10	18	5	8	5	8	8	8	6	7	5	231
XLOC_011115	14	65114582	65115387	+	4	2	2	3	0	12	1	3	3	3	3	4	7	4	3	2	2	8	1	0	2	2	0	2	7	3	7	1	2	19	6	1	6	0	2	3	130
XLOC_011116	14	65115644	65116953	+	6	3	1	4	4	14	4	3	4	3	10	5	14	10	9	0	8	12	7	3	8	4	7	9	10	6	5	2	3	20	3	11	6	1	8	8	235
XLOC_011117	14	65117449	65118811	+	10	7	10	7	9	14	9	3	9	8	11	14	16	7	7	7	7	9	8	8	14	3	9	12	13	10	14	2	10	22	15	14	4	3	11	6	342
XLOC_011148	14	68347983	68348883	+	7	5	8	5	5	4	5	5	1	4	3	5	1	4	7	2	4	5	13	3	5	7	7	10	3	3	11	4	4	3	4	4	1	3	7	6	178
XLOC_011149	14	68348945	68349722	+	5	3	3	2	5	3	0	3	4	1	9	1	7	6	6	1	3	2	3	6	3	2	5	0	0	2	5	7	4	2	4	5	1	2	3	4	122
XLOC_011151	14	68351159	68351772	+	3	6	5	6	2	2	3	3	3	2	2	0	2	0	4	4	7	5	2	1	4	2	4	2	5	1	4	2	5	2	4	2	2	2	5	0	108
XLOC_011152	14	68352409	68355224	+	24	30	12	18	19	32	12	21	16	22	28	11	21	18	18	19	30	22	19	19	23	15	18	20	21	12	21	21	19	16	27	20	18	8	23	14	707
XLOC_011161	14	69145229	69149275	+	51	52	37	41	40	30	76	49	31	48	55	25	48	62	48	50	85	48	83	54	82	43	28	29	53	47	66	50	97	48	54	58	63	52	37	39	1859
XLOC_011164	14	70050786	70064300	+	44	54	85	42	55	35	51	52	45	46	52	32	41	41	55	35	45	55	60	46	34	53	45	49	51	26	59	31	30	45	73	66	58	24	51	60	1726
XLOC_011166	14	70054597	70054947	+	4	4	3	3	3	5	2	2	4	6	2	0	5	4	6	3	6	3	2	2	3	1	2	1	7	3	1	2	5	6	6	0	7	4	4	6	127
XLOC_011168	14	70064964	70067802	+	13	26	27	24	18	18	33	32	21	21	31	20	18	12	32	17	24	34	25	20	26	40	21	14	8	19	33	16	22	17	26	23	18	10	20	24	803
XLOC_011173	14	70073222	70073937	+	3	1	5	3	7	4	5	4	3	5	4	0	4	3	6	3	3	2	3	1	1	3	4	7	2	6	0	2	5	4	2	4	4	0	4	4	121
XLOC_011178	14	70303680	70324478	+	252	187	192	208	152	202	291	210	219	253	201	148	320	209	255	181	241	185	221	196	323	248	250	213	263	231	304	210	319	213	303	251	304	133	227	200	8315
XLOC_011208	14	72870838	72871206	+	7	3	11	7	13	2	12	4	7	1	1	1	6	9	2	2	5	9	6	0	2	4	3	10	3	9	8	4	7	9	7	4	2	3	1	5	189
XLOC_011209	14	72873260	72873601	+	1	3	2	3	4	8	9	1	3	3	3	5	7	5	0	3	7	6	2	4	5	3	5	3	1	9	6	4	5	10	11	3	7	1	5	9	166
XLOC_011222	14	73788240	73790207	+	11	11	3	7	15	3	5	6	7	10	5	4	10	7	10	6	28	8	16	5	10	1	8	5	9	17	18	10	20	14	11	4	11	1	4	7	327
XLOC_011236	14	75682119	75682765	+	3	5	3	4	2	5	4	0	2	5	6	5	1	1	3	6	8	5	6	2	6	2	5	1	2	6	5	9	4	7	5	1	6	1	6	4	146
XLOC_011237	14	75683163	75684185	+	5	6	8	2	7	13	3	6	7	9	7	11	5	11	6	6	8	7	10	16	12	13	3	6	5	6	8	11	8	8	11	3	8	2	6	3	266
XLOC_011243	14	75914324	75915608	+	7	9	4	7	12	5	6	8	13	3	12	3	5	13	2	2	10	6	8	7	9	6	9	1	3	8	4	3	6	4	4	9	15	5	12	5	245
XLOC_011251	14	76178289	76199777	+	185	47	70	63	121	118	91	97	117	76	210	110	127	57	75	59	103	74	198	64	129	74	122	48	116	53	82	58	87	77	89	79	94	69	120	60	3419
XLOC_011252	14	76179879	76180460	+	9	4	6	7	8	11	7	6	5	3	1	2	4	13	4	1	2	10	10	7	4	1	3	4	2	4	4	8	3	17	3	13	4	2	9	4	205
XLOC_011256	14	76203031	76204347	+	4	2	1	5	7	7	5	6	12	8	13	6	3	5	1	4	5	9	14	3	1	6	4	2	4	2	2	7	6	6	1	2	4	1	8	3	179
XLOC_011285	14	83495242	83496686	+	5	6	8	6	5	4	11	4	11	7	6	6	6	5	12	10	10	3	15	4	15	6	3	12	11	0	4	2	16	7	18	4	14	1	4	4	265
XLOC_011287	14	83654584	83656468	+	40	24	32	23	30	20	44	28	35	34	41	47	52	28	23	26	39	37	44	32	38	29	36	36	31	35	47	26	37	40	42	44	38	35	28	32	1253
XLOC_011289	14	83820808	83825575	+	89	107	72	93	64	86	93	116	106	87	80	52	85	73	63	118	149	76	115	102	144	72	75	53	74	103	130	109	153	121	100	125	121	61	72	83	3422
XLOC_011294	14	83860386	83861289	+	3	5	2	6	2	8	6	6	2	8	4	3	2	6	1	4	5	2	0	2	6	8	6	3	0	6	9	4	11	5	9	3	3	2	2	4	158
XLOC_011297	14	83862849	83863553	+	2	5	3	6	6	6	6	7	8	3	5	7	2	5	6	13	4	6	13	2	7	9	8	10	3	7	6	4	5	16	12	7	6	0	5	7	227
XLOC_011298	14	83863705	83865599	+	9	17	11	14	6	16	20	8	15	10	17	10	2	20	10	20	24	13	19	4	11	24	21	19	5	12	17	6	20	20	19	12	11	14	11	24	511
XLOC_011299	14	83865788	83866930	+	2	12	7	6	2	8	5	8	6	8	18	5	3	13	3	9	6	7	13	5	7	7	2	6	3	10	6	4	7	3	6	4	7	2	3	12	235
XLOC_011302	14	84116708	84118510	+	2	2	6	3	8	5	20	2	2	8	7	6	11	7	3	6	1	6	38	2	7	3	3	8	28	13	20	13	14	18	9	23	10	5	4	2	325
XLOC_011306	14	84504630	84505955	+	15	4	7	9	11	9	13	13	8	8	15	16	5	14	10	19	21	11	13	24	19	8	11	4	11	7	15	11	17	18	12	15	11	7	11	5	427
XLOC_011307	14	84507157	84509717	+	7	11	5	10	5	6	9	23	10	12	17	4	7	15	7	9	17	20	17	13	46	8	5	7	8	11	11	4	10	30	16	18	16	1	12	9	436
XLOC_011309	14	84510252	84511772	+	9	6	5	2	5	2	5	10	11	8	8	8	7	6	5	2	6	12	20	8	11	0	3	7	7	7	8	3	10	20	7	6	12	1	5	3	255
XLOC_011350	14	1369536	1370571	-	5	3	0	4	1	6	3	1	2	0	3	2	0	14	3	4	2	6	6	1	10	2	6	2	1	3	2	2	6	12	4	5	6	0	3	2	132
XLOC_011359	14	1428543	1429517	-	8	4	5	6	4	8	11	11	4	7	9	8	10	12	16	8	6	5	8	8	22	3	5	5	12	8	8	11	10	8	15	9	5	8	7	7	301
XLOC_011363	14	1432785	1433910	-	3	6	4	5	2	3	7	4	3	3	5	1	3	2	7	3	9	4	8	8	8	4	6	3	6	7	8	1	10	1	8	5	6	2	3	5	173
XLOC_011366	14	1440996	1442068	-	5	2	10	4	2	6	7	6	3	5	5	2	5	4	4	5	3	7	2	7	6	0	1	6	3	2	14	6	9	3	9	9	7	3	3	5	180
XLOC_011377	14	1601216	1602535	-	9	8	10	12	8	6	14	11	17	9	12	8	11	15	12	3	13	12	15	16	21	5	12	19	11	4	13	8	15	14	12	15	9	3	6	11	399
XLOC_011383	14	1638998	1640579	-	12	10	4	7	8	11	7	11	18	16	10	5	13	10	7	11	15	15	11	10	10	13	5	8	7	14	12	9	9	9	18	16	8	3	10	12	374
XLOC_011385	14	1641420	1643657	-	23	18	10	13	14	13	13	14	5	20	21	0	10	10	14	11	19	13	14	15	18	15	12	9	9	8	16	16	17	24	19	16	22	3	12	8	494
XLOC_011389	14	1649270	1649839	-	5	4	2	4	1	3	4	4	6	3	6	0	1	3	3	1	3	3	7	1	10	1	4	4	2	3	5	4	3	3	7	2	4	0	3	3	122
XLOC_011390	14	1650411	1651384	-	12	6	5	6	0	3	4	5	4	3	2	1	2	8	3	5	3	4	2	7	7	4	6	5	6	13	6	4	0	4	7	6	8	1	1	5	168
XLOC_011393	14	1692674	1693527	-	7	5	0	5	5	4	6	2	5	2	5	3	0	3	4	7	3	8	1	4	4	0	2	2	2	1	5	1	12	6	7	6	4	1	7	4	143
XLOC_011401	14	1895253	1898836	-	18	32	23	31	33	19	29	15	21	22	24	12	26	28	28	35	32	14	23	21	47	20	28	21	25	19	63	33	28	18	53	31	30	5	34	22	963
XLOC_011402	14	1899171	1907319	-	526	371	454	484	372	301	577	439	407	366	421	362	557	302	401	253	446	300	420	384	582	337	427	445	481	342	616	558	358	300	579	484	512	461	552	444	15621
XLOC_011421	14	2245932	2247039	-	8	6	3	5	1	5	1	6	1	5	5	1	4	4	11	7	4	8	1	4	9	2	0	1	6	8	10	1	2	7	1	1	5	1	0	7	151
XLOC_011426	14	2252361	2252723	-	7	0	4	1	2	5	1	3	3	2	6	2	3	1	3	4	0	4	0	3	4	1	0	2	7	3	7	3	1	3	0	2	1	2	2	3	95
XLOC_011440	14	2351031	2354148	-	24	19	10	16	23	21	14	15	12	15	36	18	24	13	17	12	31	16	26	15	34	8	15	17	19	16	31	23	16	27	42	28	17	7	20	19	716
XLOC_011468	14	8896251	8897977	-	40	40	28	28	38	37	34	60	33	39	46	52	38	45	40	30	42	45	31	49	73	40	25	33	49	28	36	35	34	50	43	55	47	35	27	38	1443
XLOC_011478	14	13495024	13717945	-	144	135	123	132	128	134	190	125	167	119	146	93	143	175	167	153	318	157	170	182	217	170	185	162	154	130	186	121	257	145	159	155	179	91	131	155	5698
XLOC_011484	14	13545911	13547452	-	12	9	6	6	6	14	24	6	16	16	13	8	10	13	11	18	22	16	13	14	22	9	14	10	9	11	18	11	9	9	6	20	12	3	11	5	432
XLOC_011485	14	13548278	13549054	-	8	2	3	3	2	4	9	3	10	3	2	6	9	3	7	11	9	7	4	7	7	2	3	4	8	11	12	4	8	6	3	3	9	0	9	2	203
XLOC_011487	14	13550590	13551052	-	2	5	2	4	2	5	9	2	5	1	1	1	4	5	3	6	8	5	3	6	12	2	5	2	3	4	9	2	7	4	3	6	3	0	5	2	148
XLOC_011492	14	13671259	13671857	-	0	5	1	2	1	3	1	1	6	5	4	0	0	2	4	6	3	2	3	1	5	5	6	5	2	0	1	0	4	4	2	0	2	1	4	2	93
XLOC_011531	14	17658960	17660124	-	6	4	5	13	6	6	12	5	10	5	8	5	5	5	7	2	12	6	9	7	5	5	5	5	12	12	2	5	7	12	10	15	5	3	9	8	258
XLOC_011532	14	17660188	17660907	-	5	1	2	8	5	10	8	4	5	8	3	3	3	0	2	1	5	4	7	10	6	3	2	2	9	6	0	3	3	2	6	5	6	1	6	2	156
XLOC_011533	14	17661123	17661617	-	2	3	2	4	2	5	3	3	5	2	2	0	5	1	2	1	3	1	4	1	10	7	0	2	3	2	2	8	1	5	2	4	6	0	4	6	113
XLOC_011581	14	23674192	23675205	-	7	10	5	6	1	5	5	6	5	5	7	3	7	3	8	0	3	4	6	7	5	6	4	4	6	6	5	5	9	3	4	8	3	0	6	2	179
XLOC_011619	14	31689816	31691894	-	11	11	7	12	8	8	7	11	4	12	18	4	9	13	7	4	7	5	10	12	8	10	19	0	8	13	8	18	10	4	11	11	2	9	20	11	342
XLOC_011622	14	31794343	31907966	-	179	178	95	153	140	230	239	191	161	165	210	134	207	296	173	181	432	282	314	211	225	126	229	172	216	171	216	151	504	244	262	232	196	112	225	174	7626
XLOC_011623	14	31797945	31799574	-	6	5	2	14	4	18	7	3	11	6	14	4	8	12	14	7	9	15	5	9	9	3	9	6	4	7	9	4	16	19	7	8	11	2	9	3	299
XLOC_011631	14	32874920	32875795	-	4	3	2	5	4	7	3	1	13	9	5	1	2	12	5	5	7	5	6	5	6	12	1	5	0	3	3	7	7	2	4	2	8	4	2	4	174
XLOC_011634	14	32877080	32877819	-	1	4	7	3	6	8	3	1	2	6	2	1	1	2	4	4	8	5	0	3	10	5	4	3	7	3	0	4	4	4	5	5	1	2	4	6	138
XLOC_011638	14	33115953	33120239	-	172	132	118	175	158	159	194	156	105	133	180	134	186	135	148	174	149	124	156	124	195	131	133	128	184	151	157	197	195	179	192	212	159	151	180	138	5694
XLOC_011646	14	35577263	35577995	-	1	1	2	4	1	4	4	1	1	5	3	4	3	2	4	4	2	2	1	2	4	10	3	3	2	3	0	5	5	4	3	0	2	4	7	3	109
XLOC_011695	14	38542105	38542917	-	0	12	2	6	0	7	2	6	7	20	0	0	1	3	6	5	1	2	1	5	7	14	0	1	0	12	3	2	1	1	0	3	1	3	0	1	135
XLOC_011698	14	38706380	38736530	-	120	157	109	190	158	114	144	121	165	176	243	100	160	129	155	191	186	115	162	126	270	187	214	130	145	125	194	161	224	134	195	133	191	105	217	132	5778
XLOC_011699	14	38718415	38719691	-	18	23	11	26	24	20	26	21	26	24	32	5	22	29	24	30	44	18	25	23	30	25	25	19	39	27	25	17	22	25	29	23	18	7	33	19	854
XLOC_011700	14	38720013	38720683	-	9	8	11	12	12	5	13	7	15	11	20	11	10	10	14	12	13	5	12	9	16	14	20	9	11	13	13	13	10	11	13	9	9	1	23	7	411
XLOC_011702	14	38731280	38731519	-	3	4	2	5	2	0	4	0	7	4	9	6	0	0	6	8	0	0	2	3	3	9	6	3	6	12	3	5	2	0	2	2	4	1	5	0	128
XLOC_011760	14	46825936	46828043	-	17	0	4	3	12	11	21	9	9	3	6	8	13	1	14	0	18	1	29	3	12	1	7	6	15	2	34	2	12	11	13	7	8	1	10	15	338
XLOC_011763	14	46831084	46831594	-	3	2	3	1	3	4	6	4	6	1	2	4	3	0	3	3	3	4	9	2	5	0	3	3	3	1	9	0	2	2	5	7	3	0	5	1	115
XLOC_011778	14	49555687	49556545	-	4	6	2	2	3	1	4	3	2	3	6	5	4	2	2	1	4	2	1	5	9	3	4	4	2	3	5	1	4	3	5	6	8	0	6	2	127
XLOC_011781	14	49698543	49699484	-	3	2	4	8	4	4	5	6	4	3	15	0	6	6	3	5	3	10	6	6	5	4	11	2	4	6	7	3	6	4	5	7	6	6	2	1	182
XLOC_011783	14	49702370	49703959	-	10	10	9	4	5	7	5	10	5	14	12	9	9	11	8	1	5	6	7	8	13	5	10	5	7	9	9	4	10	2	13	6	7	10	4	2	271
XLOC_011792	14	53778447	53778864	-	63	42	61	48	57	68	74	66	52	57	32	69	102	84	61	44	118	62	62	41	74	82	30	54	86	62	64	83	117	65	67	68	101	88	36	61	2401
XLOC_011830	14	63810266	63811220	-	7	10	7	11	10	2	12	7	6	14	15	4	10	9	5	11	11	9	6	2	17	4	6	3	10	11	12	20	14	12	12	11	7	3	3	4	317
XLOC_011852	14	68466158	68466860	-	3	8	1	3	3	5	4	1	2	7	8	2	4	4	5	6	4	3	1	2	6	0	4	2	6	4	6	8	6	4	3	3	4	2	5	6	145
XLOC_011868	14	71590919	71602965	-	51	64	43	65	51	60	87	62	50	45	60	45	61	64	60	51	73	56	75	52	115	68	70	59	58	76	95	56	79	47	96	67	49	21	70	49	2250
XLOC_011869	14	71595316	71596041	-	2	4	4	1	3	1	3	8	1	0	11	1	3	4	6	2	2	3	4	1	2	7	4	3	5	7	5	6	4	3	2	4	5	0	2	3	126
XLOC_011877	14	71734689	71736666	-	13	7	11	11	16	9	18	8	6	11	14	15	12	23	11	17	29	9	24	8	31	5	10	11	12	17	13	21	31	28	17	18	23	15	20	12	556
XLOC_011904	14	75946272	75947294	-	3	3	1	0	0	4	6	0	1	0	0	2	14	8	0	0	0	1	0	2	4	1	0	4	11	8	6	2	1	12	3	2	2	0	1	2	104
XLOC_011905	14	75947349	75948202	-	1	0	0	5	0	6	3	2	0	0	0	0	7	14	0	1	0	4	2	0	2	1	1	2	9	8	4	0	0	3	2	2	2	0	1	1	83
XLOC_011911	14	76011842	76012714	-	5	5	2	6	1	7	3	2	1	4	3	2	4	2	2	5	3	4	4	3	3	4	3	5	4	3	7	8	3	10	5	2	6	1	4	3	139
XLOC_011944	14	82094007	82095320	-	0	0	0	0	7	0	2	10	0	7	6	1	1	0	0	0	1	0	3	1	0	1	0	0	1	1	0	2	9	0	2	4	0	5	4	0	68
XLOC_011963	14	83235681	83241418	-	97	1	23	6	44	134	14	109	8	4	11	0	87	7	30	4	154	113	2	116	5	6	0	2	126	4	49	3	99	140	6	193	6	5	4	2	1614
XLOC_011967	14	83541174	83541568	-	3	5	1	0	3	1	3	2	7	1	6	6	2	2	2	2	4	4	2	0	1	1	3	3	2	1	2	3	2	1	1	3	6	0	1	0	86
XLOC_011974	14	83875698	83876141	-	1	8	4	3	6	3	0	3	2	3	2	4	1	2	2	4	1	1	2	5	3	5	3	3	0	2	5	4	3	5	10	4	4	2	1	6	117
XLOC_011979	14	84243413	84243992	-	2	2	1	2	5	5	1	7	1	2	5	2	5	2	6	3	7	4	3	8	5	4	4	2	4	2	6	4	4	6	2	2	4	3	7	3	135
XLOC_011980	14	84244434	84245025	-	4	4	4	3	4	4	2	6	4	5	4	0	7	4	1	6	5	1	1	7	2	1	2	2	1	2	7	2	5	7	2	4	3	1	4	5	126
XLOC_011986	14	84251388	84251734	-	10	9	5	1	10	7	3	11	6	13	5	11	8	4	9	5	5	4	5	9	4	8	2	3	9	9	10	9	10	11	13	9	4	6	1	5	253
XLOC_012002	15	1738231	1739540	+	9	5	1	6	3	3	9	6	4	5	9	1	13	3	4	5	8	7	5	4	4	9	5	11	3	8	7	8	8	7	7	5	8	6	7	5	218
XLOC_012021	15	3501173	3502697	+	3	5	1	5	4	7	13	4	5	8	14	1	5	2	3	4	15	2	9	2	9	17	6	1	4	4	9	2	11	3	6	4	4	5	10	1	208
XLOC_012032	15	5752214	5760261	+	93	77	67	84	84	72	119	75	73	106	63	31	66	90	77	74	109	105	131	76	115	109	81	86	76	91	101	74	110	78	131	76	104	34	64	80	3082
XLOC_012052	15	8093192	8095214	+	12	9	13	8	23	5	8	9	6	11	10	5	23	11	6	12	11	6	12	4	18	4	4	12	13	25	22	13	6	14	10	10	17	6	2	7	387
XLOC_012054	15	8096375	8098081	+	6	12	7	5	20	5	7	10	6	4	4	5	18	6	10	4	16	9	9	11	6	6	2	12	12	23	26	8	7	8	8	9	11	7	4	6	329
XLOC_012057	15	8100919	8102201	+	9	2	2	1	12	2	1	7	5	2	1	2	5	2	4	4	12	2	4	4	2	2	1	4	7	11	7	2	2	5	4	5	3	3	0	4	145
XLOC_012058	15	8102369	8103080	+	4	2	6	3	7	4	3	3	1	2	1	1	3	4	4	3	6	5	5	3	1	4	4	2	4	7	6	5	2	2	1	3	4	2	0	2	119
XLOC_012065	15	8229706	8230583	+	1	7	5	3	3	4	4	0	0	6	1	0	2	11	2	5	3	6	10	4	4	8	1	6	6	5	6	11	6	4	2	3	4	2	3	0	148
XLOC_012066	15	8230853	8235520	+	41	39	46	41	72	37	61	36	38	61	30	17	48	51	44	58	91	35	79	36	61	67	20	24	45	42	68	42	58	36	77	24	55	16	20	39	1655
XLOC_012067	15	8236027	8239311	+	82	104	76	72	68	83	147	94	105	146	91	65	118	98	94	121	175	77	149	96	122	134	87	47	117	91	104	84	115	95	184	100	131	62	73	73	3680
XLOC_012108	15	18039381	18040158	+	0	3	2	2	3	0	3	3	4	0	6	2	6	1	9	2	5	0	8	2	4	0	7	1	3	3	3	6	6	8	3	3	3	6	5	1	123
XLOC_012113	15	18271042	18272029	+	3	1	5	4	1	5	2	3	4	5	1	1	3	6	2	2	6	3	4	4	3	1	4	2	7	7	8	10	1	3	2	5	3	1	1	2	125
XLOC_012116	15	18274312	18275984	+	9	11	3	14	7	8	7	14	12	13	14	1	9	12	8	9	17	9	12	13	7	18	7	9	13	7	16	8	11	11	14	13	12	5	12	12	377
XLOC_012149	15	22922797	22923654	+	1	2	5	7	3	6	1	6	1	5	3	6	2	7	2	2	12	7	10	5	4	3	3	3	5	6	7	5	11	1	3	4	5	5	3	5	166
XLOC_012155	15	23070209	23070975	+	4	6	3	2	3	3	4	5	4	5	3	4	4	5	2	3	2	2	8	4	8	5	4	3	0	6	3	8	6	3	10	1	3	1	2	9	148
XLOC_012164	15	24733361	24734933	+	10	18	13	17	9	8	13	8	13	15	14	17	13	15	14	19	26	12	19	13	15	9	15	9	10	14	22	12	25	18	11	22	13	7	18	18	524
XLOC_012186	15	25534554	25535977	+	87	16	9	13	9	13	6	24	14	14	4	0	19	37	13	18	12	15	7	15	9	5	9	1	18	12	10	15	8	6	0	4	3	1	1	3	450
XLOC_012189	15	25597508	25598076	+	6	2	6	0	6	3	1	1	0	6	1	0	3	1	3	3	7	1	5	2	2	2	2	4	1	8	4	5	4	2	4	7	3	1	1	3	110
XLOC_012198	15	28289140	28290328	+	6	4	8	6	9	14	7	10	5	8	6	6	5	10	6	9	9	5	8	2	18	14	4	6	8	5	12	8	10	8	8	8	6	4	6	5	273
XLOC_012199	15	28290477	28293817	+	18	25	21	22	37	31	21	20	34	22	27	15	13	35	23	17	41	24	24	20	28	15	22	16	23	28	28	24	50	25	24	17	34	12	33	26	895
XLOC_012221	15	29541958	29542792	+	5	0	3	0	1	7	0	0	0	0	5	0	11	0	3	0	1	5	0	0	0	0	10	0	6	1	14	0	0	10	0	0	0	0	10	1	93
XLOC_012242	15	29919284	29920003	+	3	1	0	4	2	4	8	6	2	2	4	3	6	2	1	5	5	6	3	1	3	7	2	5	3	1	5	4	4	6	3	5	1	1	5	5	128
XLOC_012259	15	30564973	30567378	+	4	3	1	3	3	8	9	1	6	7	14	2	6	5	1	5	7	8	12	8	18	12	15	5	3	3	12	2	6	7	22	11	12	1	15	5	262
XLOC_012267	15	31332975	31334046	+	5	8	6	4	1	3	7	12	0	4	2	2	5	2	2	1	11	1	9	7	9	8	6	4	4	5	5	3	9	3	7	5	7	9	7	5	188
XLOC_012294	15	34167370	34167926	+	1	6	4	7	1	1	12	12	9	1	5	0	2	3	1	2	1	0	5	7	5	0	12	0	0	5	5	7	2	1	10	11	8	0	6	0	152
XLOC_012295	15	34221131	34223671	+	35	30	22	30	29	37	39	42	27	36	62	27	41	40	39	43	41	40	48	42	62	25	44	29	42	37	41	39	57	54	49	37	44	7	48	36	1401
XLOC_012296	15	34576974	34577271	+	0	2	3	3	2	4	9	1	7	1	2	0	3	4	2	3	9	2	2	2	4	3	2	4	7	2	0	4	3	4	8	1	2	4	5	5	119
XLOC_012323	15	38627931	38629279	+	6	0	8	2	0	3	0	7	0	20	3	6	5	2	3	0	2	0	0	1	2	10	5	2	2	0	5	0	0	1	2	11	0	18	1	2	129
XLOC_012336	15	38988585	38989446	+	4	7	7	3	5	3	0	3	7	1	3	4	5	9	6	7	12	3	5	3	5	2	3	3	8	5	3	1	7	1	5	4	3	0	2	2	151
XLOC_012338	15	39366527	39366922	+	7	3	9	4	4	9	10	3	6	3	13	8	6	2	7	4	11	5	9	3	14	8	8	3	12	5	5	5	6	7	8	9	5	3	7	11	242
XLOC_012360	15	41017267	41026988	+	6	13	12	13	11	22	9	14	5	16	9	8	10	20	12	15	14	23	17	7	6	8	7	9	9	8	18	5	13	36	5	20	13	7	10	9	439
XLOC_012370	15	42389058	42389578	+	4	6	1	5	2	5	5	5	4	1	1	6	5	5	0	2	0	0	3	2	3	2	6	3	3	5	1	4	0	0	2	6	6	0	0	1	104
XLOC_012385	15	42448445	42449630	+	4	5	2	5	10	2	9	2	7	0	5	6	7	6	1	4	6	3	6	7	3	6	10	4	3	3	1	3	6	3	2	9	2	2	3	15	172
XLOC_012397	15	43770323	43771812	+	61	38	34	47	47	50	72	66	49	52	84	64	79	56	45	34	76	58	71	67	87	40	45	57	77	54	78	68	113	65	75	86	80	24	63	67	2229
XLOC_012401	15	43776451	43777151	+	2	1	2	1	0	8	8	3	0	2	6	1	5	4	1	6	6	6	4	3	2	0	7	2	3	0	2	4	6	6	4	5	0	1	0	1	112
XLOC_012402	15	43777284	43778232	+	4	3	2	1	2	8	4	9	5	3	6	6	3	8	1	7	5	4	5	4	5	6	8	1	9	9	3	5	3	9	4	12	6	1	2	3	176
XLOC_012417	15	44481020	44482327	+	7	2	3	5	10	6	12	6	5	4	10	2	2	3	4	3	13	13	9	2	9	2	4	4	4	6	2	2	9	8	14	4	8	1	2	6	206
XLOC_012420	15	44490029	44491843	+	9	5	12	9	12	12	17	3	6	9	20	11	17	3	9	3	18	12	15	0	11	8	9	17	23	10	13	7	14	27	15	4	3	10	19	7	399
XLOC_012442	15	45901759	45902451	+	3	4	1	3	1	4	5	0	5	2	2	1	7	5	2	3	3	0	3	0	3	2	6	2	3	3	4	4	2	6	7	5	5	8	0	6	120
XLOC_012446	15	46373716	46374676	+	3	3	6	4	5	4	4	8	7	3	0	2	1	8	0	4	3	2	12	1	10	2	3	3	1	6	6	4	6	5	6	6	9	1	2	5	155
XLOC_012447	15	46375113	46376606	+	4	7	5	3	3	5	18	9	9	7	8	5	4	14	4	5	9	8	18	9	23	9	5	3	5	9	9	11	5	6	21	15	13	2	8	11	309
XLOC_012473	15	47011165	47012278	+	7	13	3	7	6	1	8	3	6	2	2	3	4	4	2	4	2	0	4	7	6	0	7	2	3	6	9	8	3	4	6	4	2	0	4	4	156
XLOC_012478	15	47020927	47023617	+	15	28	9	27	9	3	27	13	9	9	15	5	17	12	4	10	8	8	14	9	22	10	11	6	14	12	11	21	18	10	19	8	9	6	11	11	450
XLOC_012579	15	50891466	50892092	+	0	0	1	0	0	0	0	1	2	0	0	11	0	1	2	3	0	1	0	0	4	0	3	2	0	0	1	11	0	0	0	1	8	0	6	5	63
XLOC_012613	15	52515065	52515791	+	4	2	2	3	2	0	8	1	6	0	2	4	3	3	2	2	1	6	4	2	4	9	2	1	2	1	3	1	1	2	4	2	0	5	3	2	99
XLOC_012615	15	52520777	52521473	+	7	2	6	3	4	2	4	4	7	2	6	7	7	2	4	2	2	5	8	6	6	5	6	10	2	1	4	4	5	11	2	5	3	4	5	8	171
XLOC_012620	15	52629307	52631349	+	37	19	9	15	23	10	27	35	30	20	28	37	31	26	10	35	23	25	38	23	48	14	15	24	25	19	17	25	31	21	37	35	37	17	17	26	909
XLOC_012623	15	53156671	53157583	+	8	4	1	3	8	3	8	5	5	8	5	3	4	8	4	8	12	1	11	3	9	1	2	7	3	1	6	3	8	2	3	5	8	2	4	7	183
XLOC_012640	15	54173540	54174274	+	4	7	3	4	7	4	4	2	5	4	2	7	5	2	2	3	2	4	2	6	5	8	3	8	3	11	4	3	8	2	3	4	5	2	6	6	160
XLOC_012650	15	54416550	54418547	+	11	8	8	9	18	5	13	8	11	8	8	3	9	11	4	6	16	4	12	7	18	9	13	8	8	10	9	7	14	6	13	5	10	2	15	8	334
XLOC_012663	15	55052858	55053814	+	3	6	4	3	9	4	8	5	4	3	5	1	4	4	5	2	6	8	6	2	2	8	4	3	5	4	3	6	5	10	4	3	2	0	3	7	161
XLOC_012664	15	55054201	55056201	+	7	6	3	8	7	15	11	15	6	15	15	10	7	16	7	6	22	10	13	12	24	9	16	12	5	14	20	15	20	14	20	7	13	10	20	15	445
XLOC_012671	15	55210971	55211863	+	5	1	2	4	0	6	1	3	4	10	7	1	8	4	6	0	2	2	3	6	5	9	2	1	4	2	9	9	3	4	1	2	11	3	9	7	156
XLOC_012710	15	57206066	57207179	+	10	1	3	7	9	0	5	1	3	13	2	7	7	1	3	1	10	4	9	5	8	6	5	3	9	1	6	9	9	8	15	9	4	1	7	14	215
XLOC_012743	15	61850459	61851074	+	6	6	1	0	3	4	9	5	5	10	9	9	7	3	6	4	4	7	3	2	5	5	5	2	7	6	7	4	5	9	4	7	4	6	3	8	190
XLOC_012764	15	65823755	65824532	+	15	9	18	14	20	14	15	21	25	13	23	6	14	21	17	15	13	7	16	15	3	12	18	20	15	24	17	20	13	14	18	18	22	16	24	6	571
XLOC_012769	15	65911804	65912612	+	7	0	6	3	2	5	12	3	2	0	1	4	7	1	1	4	3	8	8	6	6	3	1	3	12	2	10	6	1	4	15	3	3	0	0	2	154
XLOC_012770	15	65913165	65915420	+	21	5	11	4	4	10	31	8	3	3	2	1	19	4	9	6	0	24	17	11	5	3	5	3	20	2	7	7	2	21	38	16	5	3	2	2	334
XLOC_012772	15	65915829	65918000	+	20	3	4	3	5	10	15	3	3	2	3	5	12	0	2	8	1	15	13	8	7	1	4	1	18	2	9	2	8	10	38	14	1	0	3	3	256
XLOC_012775	15	65923449	65924600	+	12	3	7	3	2	4	14	5	8	2	3	0	9	5	3	3	6	5	13	8	5	6	5	4	22	2	11	9	4	7	15	10	7	2	1	8	233
XLOC_012776	15	65924708	65925420	+	9	2	1	4	1	5	10	0	4	1	1	1	8	1	0	3	2	5	1	7	4	3	1	6	7	1	5	3	1	8	6	1	4	0	3	3	122
XLOC_012783	15	66037883	66038777	+	5	10	2	8	9	9	3	4	0	10	2	1	5	1	2	4	4	0	4	4	11	2	4	2	6	6	1	5	5	4	2	2	9	0	5	8	159
XLOC_012791	15	66077233	66079184	+	12	30	4	41	14	7	8	11	17	6	2	11	11	14	5	23	12	6	11	19	11	8	12	14	12	3	5	25	24	3	19	26	16	3	1	17	463
XLOC_012802	15	66334343	66337169	+	13	21	11	20	26	17	23	12	14	16	9	10	22	19	9	20	30	13	17	16	17	16	20	26	15	19	24	18	9	23	21	18	18	4	10	21	617
XLOC_012806	15	66346734	66349046	+	8	15	1	15	12	5	11	18	10	10	23	9	6	20	9	24	15	13	13	11	11	11	21	11	17	8	8	4	17	6	10	12	9	3	9	8	413
XLOC_012807	15	66349170	66349875	+	3	5	4	6	5	2	2	6	1	7	1	2	2	6	0	8	5	3	7	2	5	0	4	7	7	7	5	6	2	2	3	2	5	2	3	4	141
XLOC_012827	15	74602407	74610886	+	75	51	47	69	72	67	70	61	68	79	76	32	71	63	61	59	109	89	93	70	112	47	61	69	75	78	94	55	100	83	98	86	90	26	49	55	2560
XLOC_012844	15	74935045	74936465	+	3	1	0	0	1	1	38	3	0	5	10	2	7	1	0	1	5	2	26	4	2	0	0	2	11	3	4	7	8	4	8	1	1	2	3	2	168
XLOC_012851	15	75272594	75275515	+	55	18	33	12	49	19	29	32	39	38	43	33	52	35	18	16	47	34	44	32	68	23	47	43	51	30	41	20	49	37	39	31	52	12	41	36	1298
XLOC_012860	15	75318346	75321033	+	10	20	4	26	10	5	17	11	6	2	19	4	7	4	10	41	16	4	22	8	17	9	3	13	8	8	9	36	9	4	6	8	13	5	4	14	412
XLOC_012872	15	76724023	76724338	+	3	4	3	4	3	2	15	6	6	2	1	2	6	2	6	5	5	4	13	4	5	5	5	4	6	5	6	15	1	4	6	7	7	5	4	1	182
XLOC_012965	15	81680904	81681252	+	0	3	1	2	1	4	1	1	1	1	0	4	1	1	1	4	2	3	2	6	2	0	0	0	3	0	3	0	3	3	0	8	1	5	1	2	70
XLOC_012985	15	82573598	82575330	+	2	12	6	3	6	2	1	3	7	5	3	0	1	3	4	1	6	0	6	4	17	6	4	4	3	8	9	4	7	1	4	13	7	0	2	6	170
XLOC_012986	15	82575389	82576537	+	2	6	3	2	8	6	6	6	12	3	10	3	2	3	2	2	12	1	5	3	10	7	4	6	0	12	5	3	9	1	8	4	14	0	6	9	195
XLOC_012989	15	82584847	82586215	+	2	7	1	7	5	3	5	4	13	7	3	2	2	1	2	5	9	0	1	0	16	5	5	6	2	2	5	2	6	5	2	9	12	4	9	9	178
XLOC_012992	15	82709017	82726518	+	2	2	0	1	0	6	1	3	0	0	1	1	0	7	0	8	0	4	7	2	11	0	2	0	4	1	2	4	0	0	1	9	8	0	1	1	89
XLOC_013041	15	84383699	84384939	+	0	0	6	0	1	5	2	3	0	1	1	2	0	0	5	4	1	17	0	2	0	0	1	4	0	0	12	0	1	6	0	1	0	0	0	3	78
XLOC_013054	15	84506799	84508158	+	6	0	5	1	4	5	11	5	3	3	8	3	8	2	6	2	2	14	6	5	13	2	1	0	8	7	14	0	0	12	11	8	7	4	9	1	196
XLOC_013104	15	6611538	6614217	-	27	41	44	28	31	30	38	28	41	38	21	21	27	42	32	50	55	40	45	20	40	49	20	40	36	19	53	23	48	29	45	38	37	17	40	35	1268
XLOC_013119	15	7879061	7880479	-	17	3	7	8	11	9	13	9	7	11	11	9	9	9	5	6	9	10	25	10	11	9	10	7	9	5	6	9	13	11	11	8	10	2	4	6	329
XLOC_013121	15	7881028	7882119	-	5	2	3	1	5	3	11	4	5	4	14	3	7	8	3	2	4	3	10	3	4	6	8	1	3	5	3	2	4	3	3	8	3	1	3	5	162
XLOC_013139	15	7996289	7997437	-	0	0	1	3	13	6	6	2	0	1	5	3	3	0	1	2	3	8	4	2	8	2	1	1	2	5	2	3	5	4	13	3	5	1	1	3	122
XLOC_013156	15	8038005	8038925	-	8	8	3	5	12	1	1	4	7	7	8	2	7	2	2	3	9	4	8	3	4	2	1	4	7	4	5	11	5	3	0	9	6	3	5	3	176
XLOC_013157	15	8039040	8039615	-	5	4	3	6	6	2	3	4	1	2	4	1	10	1	5	8	5	2	7	5	4	3	1	3	5	5	7	3	4	2	3	2	2	2	6	1	137
XLOC_013161	15	8042880	8043543	-	7	3	2	3	10	2	3	3	1	5	1	1	0	2	4	2	4	0	5	3	6	1	1	3	2	7	8	3	1	3	3	1	1	0	1	2	104
XLOC_013166	15	8064427	8066353	-	19	14	14	9	28	9	5	11	10	7	13	7	14	8	8	12	16	10	9	14	11	9	2	11	17	22	10	11	17	12	11	13	12	5	14	10	424
XLOC_013167	15	8067263	8068005	-	2	1	8	4	8	2	2	2	6	5	5	0	6	1	4	13	7	3	2	4	4	4	1	5	4	9	5	2	1	4	2	4	4	3	0	2	139
XLOC_013188	15	12448825	12449478	-	6	13	8	15	3	6	14	6	3	6	3	3	5	13	8	10	10	4	12	4	4	4	2	3	11	4	11	15	9	6	11	7	8	9	3	6	265
XLOC_013191	15	14115175	14115736	-	10	2	2	2	3	2	5	2	1	0	1	2	7	5	5	5	4	2	2	2	4	2	0	2	6	3	6	2	5	5	4	2	5	1	1	3	115
XLOC_013194	15	14714005	14715155	-	3	4	3	3	4	4	4	1	2	5	1	1	5	6	3	1	8	6	5	3	9	11	6	0	2	7	6	2	7	2	10	5	4	4	3	7	157
XLOC_013205	15	15701273	15704841	-	9	7	2	3	3	7	12	7	11	12	7	9	8	9	6	4	10	13	24	5	14	3	7	3	5	1	12	4	7	15	8	10	9	5	8	7	286
XLOC_013229	15	18050259	18051330	-	6	1	7	4	3	6	5	4	2	2	5	0	2	2	7	8	6	3	1	4	0	1	6	2	4	2	4	1	2	5	2	6	2	0	6	2	123
XLOC_013231	15	18052065	18052699	-	5	4	4	3	6	3	6	0	5	0	1	0	2	4	4	8	3	1	7	2	5	5	1	1	9	2	8	5	4	1	3	2	5	2	2	3	126
XLOC_013236	15	18454836	18494061	-	188	158	159	157	191	223	266	169	155	179	201	160	188	193	169	125	361	283	262	211	279	139	148	194	163	173	253	152	378	227	205	261	243	126	217	236	7392
XLOC_013241	15	20546750	20547325	-	8	4	0	5	3	4	8	6	6	6	3	1	8	4	2	2	4	2	4	4	2	1	1	3	6	11	6	4	7	4	10	4	3	3	6	4	159
XLOC_013260	15	22662947	22663657	-	7	0	2	1	6	1	6	4	2	3	3	5	6	5	5	1	7	5	10	2	2	0	2	2	0	2	3	3	4	3	7	2	7	1	6	2	127
XLOC_013261	15	22663719	22664377	-	9	6	1	2	2	3	2	5	3	2	3	0	1	2	3	7	3	2	4	6	3	0	4	0	2	0	5	1	7	2	5	4	4	0	2	0	105
XLOC_013275	15	25249768	25250994	-	4	3	1	8	3	6	1	3	4	3	12	1	2	2	1	3	1	4	1	3	10	6	3	2	4	2	2	5	3	6	2	2	5	1	4	4	127
XLOC_013307	15	28926760	28964813	-	3476	1747	2634	1901	2364	1795	2446	2505	2310	2101	1811	2140	2948	2535	2256	1632	3823	2226	2679	2467	2755	2125	1771	2104	2552	2159	2704	2743	3560	2268	2806	2758	2406	2653	1685	2100	86945
XLOC_013318	15	29707104	29717815	-	8	19	18	13	19	22	5	20	20	12	20	25	14	39	23	18	15	24	17	11	12	8	12	10	16	14	10	25	27	46	12	19	10	8	5	17	613
XLOC_013381	15	35681249	35683308	-	21	11	15	19	15	23	21	10	14	16	14	5	19	18	21	10	22	15	13	17	21	19	19	14	21	19	22	15	20	23	25	24	25	9	13	23	631
XLOC_013450	15	44214513	44215692	-	2	10	2	10	8	3	5	5	7	6	7	6	3	3	5	12	7	2	8	9	8	4	2	5	2	3	4	13	9	0	9	11	7	0	3	4	204
XLOC_013459	15	45127249	45128445	-	14	14	14	20	17	9	30	10	19	16	19	20	18	16	9	16	31	13	35	13	23	15	22	13	16	17	16	20	26	17	22	11	18	13	19	18	639
XLOC_013592	15	51021829	51024549	-	19	33	39	50	28	13	34	25	12	21	12	14	7	40	39	20	89	15	57	10	30	10	3	21	9	19	68	46	84	40	22	35	31	16	3	36	1050
XLOC_013620	15	52871082	52884324	-	14	9	0	12	11	2	13	11	2	8	4	9	17	1	1	5	2	2	14	19	4	7	0	15	17	1	0	12	6	8	23	11	4	4	4	9	281
XLOC_013637	15	53134001	53136791	-	20	18	17	5	11	13	17	20	15	15	13	13	10	25	19	17	26	20	25	6	31	21	14	16	16	21	20	22	37	31	18	13	24	13	21	27	670
XLOC_013677	15	56520116	56522664	-	14	17	11	16	20	11	9	23	16	26	30	12	14	17	10	21	17	6	7	10	34	15	17	15	14	15	25	24	19	14	18	27	20	5	23	29	621
XLOC_013678	15	56522936	56523919	-	5	7	5	7	3	3	5	13	6	6	6	3	9	8	8	5	9	1	4	7	12	8	8	3	2	9	7	6	3	7	3	8	8	1	10	2	217
XLOC_013734	15	65136320	65137604	-	6	3	1	6	18	2	6	1	5	5	3	2	6	4	2	1	12	4	9	3	8	4	0	2	2	10	4	8	5	4	8	5	9	3	4	1	176
XLOC_013738	15	65356891	65357952	-	4	5	6	5	5	2	7	1	6	5	9	8	7	11	5	7	2	2	9	4	13	4	6	3	7	2	7	11	6	8	12	7	9	3	7	3	218
XLOC_013740	15	65362040	65363072	-	4	7	6	5	10	7	7	5	1	5	6	3	6	4	4	1	10	11	6	9	13	8	2	7	9	9	8	7	3	4	6	7	8	2	9	5	224
XLOC_013743	15	65767069	65779096	-	68	39	60	45	42	41	59	49	67	52	45	34	74	39	67	47	71	69	44	87	58	48	75	61	61	44	79	84	59	56	51	71	53	53	43	56	2051
XLOC_013750	15	65930309	65935357	-	8	2	3	10	10	11	12	10	4	5	13	11	8	4	2	15	8	12	38	6	12	6	15	13	4	3	11	9	11	8	8	6	8	3	16	7	332
XLOC_013790	15	76573640	76591859	-	200	170	118	127	133	139	353	205	174	108	157	118	241	147	143	183	211	120	336	123	262	161	149	108	143	175	258	139	249	169	320	227	248	67	157	126	6464
XLOC_013792	15	76580480	76580946	-	4	8	5	8	3	2	13	7	7	7	9	4	6	9	5	10	5	0	11	2	5	11	5	4	6	3	8	3	13	2	13	3	7	4	3	9	224
XLOC_013801	15	76832332	77022597	-	268	292	242	291	225	271	288	311	292	265	316	209	273	259	224	238	416	303	410	273	440	232	261	252	243	307	361	288	411	341	354	397	349	149	252	308	10611
XLOC_013808	15	77121770	77124873	-	30	19	17	11	16	22	35	34	5	14	30	22	11	12	10	13	16	23	79	11	17	5	13	9	19	13	21	20	11	17	26	26	15	2	8	9	661
XLOC_013830	15	78422841	78424093	-	12	6	5	3	6	6	7	8	2	2	9	7	11	4	5	5	13	12	11	7	6	3	7	3	8	5	5	1	10	5	3	8	6	5	6	4	226
XLOC_013886	15	80777052	80777318	-	24	0	26	0	7	10	21	9	8	0	5	5	33	0	18	0	11	10	18	9	18	0	11	7	26	0	35	0	15	14	21	12	12	0	12	8	405
XLOC_013909	15	82082388	82082943	-	0	5	1	2	2	3	3	5	0	0	2	4	0	0	2	1	4	1	8	1	5	0	4	3	1	2	0	0	2	5	2	9	0	1	7	0	85
XLOC_013916	15	82109376	82109775	-	0	1	0	1	1	3	8	6	2	5	1	0	1	0	1	5	0	4	2	1	3	2	3	5	0	0	5	0	1	6	4	4	5	2	2	0	84
XLOC_013940	15	83431232	83435882	-	1	3	0	6	0	0	3	6	16	0	3	0	3	1	1	5	2	0	0	5	16	1	1	0	4	1	0	1	0	2	4	11	12	0	4	0	112
XLOC_013946	15	83555805	83557136	-	4	15	14	16	12	27	15	20	4	12	5	9	11	7	11	18	23	39	10	6	9	12	4	10	11	6	16	6	12	44	13	23	9	1	4	8	466
XLOC_013949	15	83561346	83562546	-	5	0	11	1	7	7	5	6	4	7	4	2	2	2	6	0	8	10	6	8	2	3	1	1	2	1	5	1	6	16	0	15	4	1	4	1	164
XLOC_013952	15	83566953	83567710	-	8	2	5	1	3	5	6	4	0	5	2	2	6	5	2	2	11	5	5	5	5	3	3	2	2	4	11	0	3	8	7	5	3	1	4	4	149
XLOC_013953	15	83599477	83600121	-	8	2	1	2	3	0	3	9	6	0	3	0	5	5	5	2	6	1	14	1	6	3	1	5	3	2	1	3	10	2	8	7	3	1	2	4	137
XLOC_013973	15	84340576	84342241	-	7	6	8	8	8	2	18	9	11	6	5	5	6	7	16	5	9	9	8	9	7	7	10	7	3	3	17	12	8	6	5	8	4	5	8	9	281
XLOC_013974	15	84342710	84343235	-	4	3	4	3	5	1	3	2	3	2	2	2	5	0	5	6	2	4	2	3	4	2	4	1	2	3	7	3	1	1	3	4	0	1	8	6	111
XLOC_013981	15	84933285	84933999	-	4	4	3	0	5	4	10	6	5	2	6	4	4	3	6	2	9	4	12	3	5	5	3	5	5	2	1	1	4	4	9	6	13	4	4	3	170
XLOC_013996	16	870650	871721	+	4	5	5	4	6	5	6	5	5	5	8	7	4	1	7	4	2	6	5	2	3	7	1	2	1	4	7	7	1	1	5	7	5	2	1	4	154
XLOC_014024	16	1463742	1467760	+	30	31	32	36	36	21	49	27	25	25	30	23	41	24	30	16	51	40	37	29	39	42	40	31	37	20	44	30	43	28	56	35	31	17	25	37	1188
XLOC_014041	16	1644011	1644963	+	1	3	8	1	5	5	10	8	4	5	2	6	6	3	4	8	9	3	8	7	7	4	6	8	5	6	16	2	7	9	6	8	8	1	8	5	212
XLOC_014045	16	1684101	1684413	+	9	11	12	15	7	8	9	19	7	11	21	11	12	8	9	17	15	11	16	14	7	8	14	8	12	9	16	10	10	14	9	11	9	10	19	10	418
XLOC_014050	16	1941382	1945598	+	40	12	21	11	36	25	22	27	10	17	6	17	24	39	28	15	50	30	40	30	19	20	6	24	39	31	26	9	40	38	34	23	16	26	10	22	883
XLOC_014067	16	2141964	2142856	+	4	6	2	6	0	2	8	4	1	0	3	2	6	2	4	4	4	2	5	3	6	2	1	2	2	5	4	1	1	5	5	5	8	1	9	4	129
XLOC_014068	16	2437902	2634917	+	95	609	465	546	220	190	202	260	965	866	337	176	141	612	653	548	550	243	101	253	1480	864	282	446	100	410	945	517	304	177	473	818	1116	472	701	395	17532
XLOC_014076	16	3220947	3221445	+	2	3	2	6	1	5	3	1	2	2	2	3	4	4	6	4	1	2	2	1	3	2	1	4	5	1	2	1	8	0	3	6	1	1	2	3	99
XLOC_014080	16	3387689	3389972	+	35	34	22	26	28	18	21	32	27	19	38	31	41	34	21	28	18	23	19	26	44	18	36	26	29	23	26	50	36	32	25	33	33	13	39	32	1036
XLOC_014157	16	22494661	22495063	+	6	1	3	8	1	8	6	10	3	3	4	1	3	9	3	4	4	5	3	4	8	3	8	6	5	4	9	3	13	10	2	1	8	4	5	4	182
XLOC_014174	16	25002580	25009442	+	23	21	8	12	20	21	42	5	23	15	41	18	18	22	17	10	29	19	55	13	16	19	36	10	12	8	12	11	10	11	52	14	23	6	31	17	720
XLOC_014181	16	25938340	25939227	+	4	4	2	3	4	5	6	1	4	1	6	7	1	8	2	1	5	5	7	4	1	9	2	1	3	2	8	3	5	9	2	5	5	5	3	2	145
XLOC_014182	16	25939653	25940974	+	9	9	6	5	4	6	13	11	7	10	10	4	8	14	6	12	11	5	26	6	7	4	7	6	10	4	11	3	11	8	6	8	11	10	11	9	308
XLOC_014185	16	26739288	26747603	+	162	114	87	135	95	117	120	143	128	140	121	73	86	117	86	139	65	154	173	126	75	145	108	70	90	87	62	103	99	161	77	107	81	59	60	67	3832
XLOC_014196	16	28066252	28069991	+	76	55	61	62	46	48	62	57	45	47	60	35	60	47	62	47	88	54	48	40	67	58	49	56	50	55	75	60	62	33	45	64	35	40	43	52	1944
XLOC_014197	16	28067345	28068028	+	5	1	4	10	8	11	9	5	7	6	4	6	4	6	11	2	11	6	7	3	6	2	2	6	7	3	8	2	2	4	3	5	1	1	5	2	185
XLOC_014198	16	28070104	28070700	+	9	5	6	3	6	5	3	5	3	8	6	2	7	4	12	1	12	6	6	4	4	7	4	3	5	6	6	1	11	5	6	6	6	0	1	7	191
XLOC_014211	16	28296977	28298056	+	5	2	5	2	3	7	4	3	3	5	7	2	7	3	1	4	6	12	9	6	13	3	3	10	5	9	10	0	7	2	3	4	4	1	3	4	177
XLOC_014216	16	29211671	29212553	+	8	5	4	3	2	4	6	4	2	2	3	5	5	4	5	3	9	7	7	4	10	4	5	6	1	3	9	3	8	7	15	3	11	5	2	2	186
XLOC_014221	16	29565236	29566037	+	3	3	5	2	9	4	1	4	3	5	3	2	8	9	3	0	3	2	2	4	4	4	5	2	6	5	6	15	11	6	4	0	8	1	2	5	159
XLOC_014227	16	29875564	29876131	+	0	2	4	6	4	2	4	5	5	9	3	3	3	6	2	1	8	4	2	1	4	3	1	3	2	1	4	2	4	5	4	4	1	4	2	3	121
XLOC_014276	16	37568079	37568345	+	7	6	6	11	7	12	6	10	9	9	6	2	7	13	7	8	19	3	18	5	11	8	4	11	8	5	7	5	12	10	8	5	7	2	6	4	284
XLOC_014296	16	40031245	40032775	+	6	4	1	3	3	4	6	2	2	8	9	3	2	7	6	8	11	4	5	3	12	1	6	5	4	8	3	2	10	6	8	5	11	1	5	15	199
XLOC_014323	16	42899369	42906185	+	2	6	2	5	10	2	4	9	2	6	13	4	7	10	8	6	9	9	10	7	8	9	5	5	5	5	10	3	9	9	6	14	8	5	7	5	244
XLOC_014325	16	42900576	42901414	+	2	4	7	2	2	5	6	3	9	6	3	3	5	6	0	2	12	8	8	5	3	5	4	7	5	2	6	3	10	4	9	9	2	1	3	4	175
XLOC_014338	16	44486460	44487924	+	10	11	12	7	16	10	11	11	13	9	12	0	8	12	11	10	17	13	9	15	21	12	16	5	9	10	13	14	18	16	8	12	19	14	14	11	429
XLOC_014341	16	44496306	44496868	+	1	0	4	2	1	2	3	3	3	0	7	4	3	5	0	1	6	3	9	4	5	4	5	4	3	3	3	0	6	0	2	2	0	1	3	5	107
XLOC_014343	16	44498265	44500376	+	17	15	16	13	17	13	13	4	13	11	16	8	13	6	11	10	25	11	19	13	16	11	10	15	17	8	19	15	18	15	16	10	13	8	11	9	475
XLOC_014348	16	44504112	44505233	+	5	2	2	4	7	3	2	2	5	0	7	4	5	2	3	3	17	5	3	3	7	3	3	4	4	6	7	2	1	5	4	2	9	0	2	2	145
XLOC_014349	16	44505372	44506463	+	2	8	2	2	2	10	11	6	6	5	7	5	2	7	0	5	10	8	3	4	3	4	5	2	2	5	6	2	10	7	3	5	2	1	4	11	177
XLOC_014351	16	44507514	44508155	+	4	4	3	2	4	5	3	6	5	9	2	5	8	8	4	1	4	2	3	2	9	1	2	6	4	2	2	7	8	4	11	5	3	1	7	2	158
XLOC_014352	16	44508477	44509293	+	2	4	4	2	5	5	7	5	5	6	2	7	7	4	1	4	9	5	5	3	15	4	5	4	8	5	8	6	13	8	7	4	5	1	4	7	196
XLOC_014353	16	44509369	44510930	+	6	10	5	10	11	9	8	4	8	9	22	7	15	12	7	5	17	11	16	10	12	7	9	7	2	9	14	13	20	7	16	7	5	1	8	10	349
XLOC_014365	16	44945686	44946831	+	13	6	11	14	9	17	12	7	9	13	10	10	16	18	14	11	7	9	12	12	15	5	14	10	4	11	13	12	12	7	11	5	17	11	11	13	401
XLOC_014366	16	44951357	44951975	+	2	6	1	3	2	3	5	3	6	2	2	0	3	3	2	8	2	3	7	0	8	1	2	1	2	1	3	3	3	2	0	3	6	2	4	1	105
XLOC_014403	16	49314168	49315076	+	203	178	189	162	171	223	221	166	209	240	253	299	316	352	218	266	499	209	269	172	376	249	276	223	271	270	239	364	370	237	287	192	339	345	339	240	9432
XLOC_014413	16	49679455	49680137	+	8	7	5	5	6	6	8	6	3	4	6	0	8	7	10	5	13	2	1	4	6	3	1	4	3	5	7	3	6	4	4	8	6	2	2	2	180
XLOC_014422	16	50833181	50845563	+	21	50	25	45	49	29	14	39	21	27	43	19	31	41	17	58	33	26	46	37	39	30	64	25	30	33	28	40	21	21	19	24	15	5	9	21	1095
XLOC_014441	16	51948645	51955507	+	6	9	5	5	4	3	15	5	8	9	2	9	7	8	10	5	6	3	10	5	7	9	14	10	12	4	8	13	4	4	21	4	5	11	1	12	273
XLOC_014478	16	52590391	52592131	+	20	8	6	2	8	6	13	7	11	8	2	3	12	1	7	9	12	7	8	7	14	8	11	9	13	4	20	5	8	9	17	10	14	1	8	3	311
XLOC_014479	16	52592953	52593699	+	7	6	0	1	5	1	3	8	7	3	3	1	4	3	2	4	3	8	7	8	8	5	12	1	2	1	4	1	4	4	1	6	15	1	5	3	157
XLOC_014481	16	52614999	52616709	+	53	45	36	33	31	29	48	51	37	32	43	25	38	42	33	36	45	32	53	45	63	30	49	22	51	22	56	24	47	27	63	45	49	17	38	29	1419
XLOC_014482	16	52617661	52619004	+	42	31	27	29	34	35	40	34	26	26	38	21	41	23	39	19	41	26	34	22	46	33	39	19	29	19	32	11	22	20	51	36	52	15	30	27	1109
XLOC_014484	16	52626186	52628158	+	16	14	13	13	19	18	10	21	14	14	14	11	10	8	14	16	12	18	9	10	16	4	10	8	18	11	24	17	9	9	13	29	15	14	20	17	508
XLOC_014485	16	52628703	52629859	+	11	4	6	7	5	2	9	9	5	8	7	9	10	6	11	9	8	4	11	6	10	5	5	3	6	8	14	8	10	5	8	12	3	2	6	10	262
XLOC_014489	16	52632094	52632878	+	6	5	2	5	5	5	5	8	1	3	1	1	5	3	6	3	5	6	5	11	3	4	2	2	5	4	3	2	5	9	3	6	8	3	9	3	162
XLOC_014491	16	52633871	52634706	+	4	2	4	2	6	4	2	1	3	9	8	3	3	5	7	5	4	6	1	2	6	3	4	3	7	5	7	4	5	5	5	7	3	1	5	5	156
XLOC_014492	16	52641084	52642078	+	16	12	13	11	11	19	18	16	22	17	27	13	28	11	8	19	18	10	13	15	30	18	16	13	19	9	16	16	22	17	21	12	15	6	28	12	587
XLOC_014505	16	52993554	52994457	+	8	9	2	4	6	6	4	5	5	2	8	3	2	7	5	7	5	6	4	7	5	5	3	5	4	6	5	6	3	3	2	7	2	1	1	1	164
XLOC_014506	16	52994691	52995990	+	5	5	3	12	3	5	4	6	4	12	5	6	4	8	4	7	7	2	4	2	5	9	2	6	2	4	7	6	4	7	4	12	4	0	2	3	185
XLOC_014507	16	52996180	52997652	+	6	11	6	13	9	9	11	14	6	9	12	2	3	7	4	11	12	5	13	7	15	8	7	6	14	6	11	17	13	6	4	8	12	2	8	5	312
XLOC_014543	16	56712362	56713165	+	1	0	0	2	3	6	2	0	2	1	0	0	1	0	3	0	4	6	6	3	1	3	0	0	1	6	8	1	2	3	1	0	4	1	2	0	73
XLOC_014545	16	56714249	56715923	+	4	7	4	10	7	11	10	10	6	6	3	4	8	7	10	7	19	13	12	7	11	8	0	5	9	15	19	3	14	14	6	11	8	2	5	10	305
XLOC_014558	16	57689444	57690008	+	4	5	1	3	1	2	5	4	1	8	5	1	3	2	6	1	7	4	7	6	7	3	6	3	4	5	7	4	3	4	6	2	3	1	6	3	143
XLOC_014625	16	66858471	66858691	+	14	14	19	9	9	7	10	20	13	10	12	12	16	18	15	20	17	11	24	8	17	10	14	17	6	7	16	15	19	12	6	12	6	10	16	9	470
XLOC_014641	16	67184281	67260367	+	7	1	1	0	7	7	10	6	10	4	10	2	8	1	1	5	6	2	6	2	17	0	0	5	9	3	3	8	6	6	17	11	13	0	16	4	214
XLOC_014643	16	67279340	67311647	+	2	3	3	4	3	3	11	2	4	1	7	0	3	7	9	2	7	6	12	3	6	5	6	4	3	1	6	5	4	11	1	7	10	5	10	2	178
XLOC_014646	16	67285356	67286270	+	1	1	1	2	9	1	4	3	2	6	3	0	0	3	4	1	9	6	5	4	5	6	1	3	1	6	5	3	1	2	4	2	3	0	1	4	112
XLOC_014651	16	67598754	67599291	+	4	2	2	5	4	5	4	1	8	5	3	2	2	6	2	8	2	3	2	1	8	4	0	2	1	0	8	1	3	6	5	1	2	0	1	3	116
XLOC_014653	16	67600063	67600836	+	4	6	6	3	8	3	10	4	6	8	6	2	8	7	7	4	7	8	6	11	11	11	2	4	6	13	8	4	9	11	11	7	8	4	2	5	240
XLOC_014663	16	67786490	67787349	+	6	5	4	10	4	5	6	4	3	0	4	4	2	6	5	3	7	2	1	6	7	3	4	2	0	3	5	5	3	1	5	13	9	2	3	3	155
XLOC_014693	16	70846134	70846634	+	1	1	0	4	1	5	0	5	1	0	1	1	4	3	1	2	9	4	2	4	1	2	0	1	0	1	7	3	7	4	1	8	2	0	2	3	91
XLOC_014705	16	71024680	71025839	+	3	7	4	16	6	2	5	8	6	4	11	2	13	5	3	1	5	1	9	8	12	2	3	8	4	5	6	7	12	3	4	6	9	3	6	6	215
XLOC_014716	16	72597333	72701052	+	112	80	68	95	89	106	141	95	71	74	104	92	116	95	87	64	104	89	113	64	125	87	103	91	115	84	123	92	111	110	142	97	92	55	96	81	3463
XLOC_014739	16	73152212	73153230	+	16	12	3	16	12	10	9	14	13	10	13	14	7	14	14	15	12	13	6	12	22	6	12	11	19	9	12	28	16	14	12	8	12	8	13	15	452
XLOC_014748	16	74009593	74029445	+	182	149	129	155	184	177	235	171	129	154	188	205	183	207	116	189	259	176	276	144	262	155	158	165	201	175	169	185	243	220	224	221	200	102	164	178	6630
XLOC_014749	16	74029500	74030077	+	8	5	4	4	3	2	3	2	4	6	7	10	5	7	4	8	11	7	13	8	2	4	6	3	10	3	7	10	7	7	4	6	3	11	7	12	223
XLOC_014773	16	77456845	77457389	+	6	2	3	6	4	8	6	6	3	3	9	0	3	5	4	2	6	5	2	3	4	3	2	0	5	3	3	5	5	7	6	9	7	2	1	1	149
XLOC_014774	16	77457452	77459245	+	17	9	5	9	16	21	10	19	9	9	14	5	5	9	9	14	16	12	8	15	10	7	9	9	15	14	10	9	10	12	9	16	9	5	7	8	390
XLOC_014777	16	77522645	77523604	+	5	3	7	4	5	11	7	5	7	6	20	16	17	6	2	2	2	8	15	5	6	1	11	3	18	4	10	4	6	8	9	10	7	9	11	7	277
XLOC_014786	16	78772558	78779390	+	79	53	46	58	66	85	76	77	73	76	84	53	103	48	42	59	59	46	53	74	144	54	55	50	90	65	71	64	70	68	91	90	87	48	62	83	2502
XLOC_014787	16	78773044	78773255	+	4	2	1	6	2	3	3	5	5	2	2	6	4	3	6	1	5	3	4	3	3	0	5	1	1	0	4	2	3	6	7	3	2	0	3	2	112
XLOC_014811	16	483473	519560	-	3	20	7	16	10	15	7	17	7	16	20	13	9	12	15	17	16	16	6	20	35	14	14	13	6	13	9	26	13	16	12	36	37	4	19	22	551
XLOC_014820	16	858417	860260	-	15	15	9	16	12	20	22	16	14	16	9	4	18	9	8	15	21	22	16	8	22	17	6	11	15	9	18	6	12	11	6	17	15	6	5	4	465
XLOC_014825	16	864191	865006	-	3	2	2	4	5	10	6	5	5	3	0	1	5	1	9	9	5	5	4	1	4	2	2	6	3	1	10	0	9	9	5	4	3	2	1	1	147
XLOC_014826	16	865115	865903	-	5	3	0	2	5	4	4	2	1	0	2	1	4	6	4	6	10	6	5	6	4	7	3	6	4	8	3	7	3	10	7	2	3	0	1	1	145
XLOC_014841	16	1946450	1947663	-	4	1	4	1	2	10	1	5	2	4	1	7	4	4	3	1	18	8	17	2	0	3	1	3	4	2	5	0	16	8	5	2	0	3	0	3	154
XLOC_014842	16	1948001	1949625	-	2	3	5	2	16	7	6	4	0	3	0	2	7	8	10	4	11	4	16	2	4	4	0	3	8	0	5	1	6	8	2	4	1	1	2	4	165
XLOC_014848	16	1960260	1961424	-	2	4	0	1	7	5	3	12	1	10	14	0	2	2	7	1	11	5	11	3	4	5	13	3	7	2	2	3	5	12	5	13	2	1	10	1	189
XLOC_014849	16	1961769	1962571	-	0	1	1	1	9	6	3	8	2	2	5	1	7	2	1	1	5	1	5	2	3	1	3	2	6	4	0	5	1	2	2	12	1	0	3	3	111
XLOC_014851	16	1963783	1964285	-	4	0	1	3	7	4	2	7	3	4	4	10	5	7	1	2	6	3	8	4	4	1	2	3	5	5	6	6	3	2	5	4	3	3	4	3	144
XLOC_014861	16	2196291	2197185	-	6	2	1	2	4	1	4	7	7	3	2	0	3	9	5	4	7	2	3	3	7	1	2	0	7	1	5	4	4	2	1	8	1	1	2	2	123
XLOC_014865	16	2207071	2207678	-	2	4	2	3	2	1	4	2	5	6	5	1	3	2	0	3	9	2	4	5	6	1	5	5	1	2	4	5	1	4	2	0	4	0	4	0	109
XLOC_014866	16	2207802	2209669	-	6	6	1	8	11	1	5	13	10	8	4	2	6	15	5	8	9	8	4	10	25	7	6	14	8	8	17	2	9	6	13	20	9	1	12	11	308
XLOC_014868	16	2210304	2211206	-	3	1	2	3	5	0	3	3	1	7	7	2	4	3	0	4	12	0	4	9	9	7	2	5	4	6	5	5	2	1	2	3	5	3	6	4	142
XLOC_014871	16	2215486	2216559	-	2	7	7	2	9	2	5	6	6	7	5	2	7	2	5	7	3	4	7	2	9	4	6	3	5	4	16	4	10	0	4	10	5	1	12	3	193
XLOC_014873	16	2217092	2217951	-	3	2	5	2	4	0	3	6	3	4	6	1	3	3	2	6	4	1	3	5	7	1	2	1	1	9	5	6	4	2	2	4	8	1	4	1	124
XLOC_014885	16	2492963	2495225	-	0	7	3	3	4	4	11	5	6	7	5	5	4	5	6	4	5	13	0	8	8	6	2	9	2	11	7	5	1	7	10	10	8	8	4	4	207
XLOC_014926	16	4244986	4274811	-	73	29	43	32	52	44	73	53	24	70	43	49	79	70	43	28	69	34	71	51	64	70	38	49	88	64	26	34	73	48	104	67	38	97	56	57	2003
XLOC_014949	16	12640313	12641074	-	6	8	8	2	6	7	7	10	5	3	10	6	12	10	6	8	12	3	14	5	3	13	8	6	10	10	8	10	12	2	10	5	6	6	8	14	279
XLOC_014994	16	22486964	22487492	-	1	1	0	5	1	4	2	1	4	5	2	6	3	5	0	3	4	4	0	2	2	0	1	0	1	1	1	7	3	3	1	1	7	0	1	5	87
XLOC_015000	16	22493738	22494485	-	4	1	2	3	3	7	4	6	3	3	3	4	5	4	5	1	9	5	7	2	8	3	1	2	5	2	3	6	6	12	2	6	3	3	1	5	149
XLOC_015026	16	27292881	27327866	-	87	37	57	38	53	175	49	94	87	88	75	63	79	66	64	50	105	204	83	117	189	69	62	75	90	55	91	50	75	249	102	152	119	50	65	75	3239
XLOC_015028	16	27308736	27309770	-	6	3	6	1	2	24	3	12	9	8	9	9	12	8	9	2	7	27	8	6	13	4	5	9	9	6	9	2	5	36	13	16	13	8	8	4	331
XLOC_015046	16	27841403	27908727	-	1258	789	790	718	843	927	1152	1038	796	942	1168	700	966	893	896	779	1381	946	1531	813	1090	882	905	802	921	628	904	723	1583	846	1281	1035	792	508	875	734	33835
XLOC_015051	16	27896278	27898365	-	4	0	0	2	6	30	7	3	2	16	5	0	1	1	2	1	7	27	6	3	1	15	1	2	1	12	1	3	3	24	3	5	1	8	0	3	206
XLOC_015055	16	27900800	27901663	-	2	1	1	0	6	16	2	0	0	7	2	4	0	0	2	0	3	6	2	1	2	4	0	0	0	3	1	4	1	10	3	1	2	0	0	2	88
XLOC_015059	16	28093022	28093431	-	9	4	5	6	7	6	6	4	3	9	3	1	3	2	3	6	11	6	6	2	9	9	1	5	5	1	0	1	9	9	6	9	2	2	0	3	173
XLOC_015060	16	28093678	28094411	-	3	4	3	6	5	4	2	1	4	4	3	6	3	6	9	6	13	1	6	0	5	1	5	9	8	1	14	8	8	4	4	5	5	0	1	7	174
XLOC_015061	16	28101602	28103603	-	11	10	3	12	10	10	15	20	21	7	5	7	14	11	13	8	11	9	12	9	44	12	9	15	7	10	10	8	7	6	12	15	17	5	7	8	410
XLOC_015074	16	29750756	29752501	-	18	21	14	22	19	18	32	10	9	19	25	13	20	12	13	17	32	19	16	17	19	19	20	17	8	18	25	12	23	14	16	19	16	12	18	19	641
XLOC_015086	16	30654018	30655781	-	17	17	13	25	10	19	14	6	18	24	22	14	19	26	17	21	13	11	18	8	31	20	16	13	25	19	20	29	13	16	19	12	21	23	17	17	643
XLOC_015096	16	31447024	31447754	-	6	4	4	2	4	1	4	4	2	5	5	0	2	1	3	4	3	2	1	1	2	3	8	0	3	8	2	1	2	6	2	4	2	2	8	1	112
XLOC_015104	16	32954941	32955575	-	0	3	3	3	6	6	2	5	2	4	6	3	3	1	4	5	6	2	7	1	5	5	4	5	4	1	2	1	3	4	2	6	2	1	10	2	129
XLOC_015106	16	32957764	32958519	-	1	5	5	4	6	3	7	3	3	2	10	0	3	5	2	5	1	0	3	4	2	5	2	1	1	4	3	0	3	1	3	5	3	0	8	2	115
XLOC_015110	16	33072504	33072784	-	4	3	4	2	6	3	3	5	11	3	4	3	4	2	6	10	7	4	6	1	8	3	6	7	8	6	6	10	10	1	9	8	8	5	4	5	195
XLOC_015119	16	34410172	34411074	-	5	3	5	6	3	3	9	6	5	6	2	1	12	5	3	2	5	3	7	3	12	5	7	3	7	5	6	4	1	5	13	10	2	2	8	6	190
XLOC_015152	16	38899990	38900625	-	6	4	1	0	4	7	4	6	1	3	1	5	2	1	1	0	4	0	1	5	1	0	1	1	7	3	6	5	2	4	5	5	6	3	0	1	106
XLOC_015156	16	40001566	40031007	-	214	195	168	170	207	188	217	185	232	199	240	163	219	269	197	207	315	216	269	213	325	222	179	216	211	195	267	222	334	211	271	231	289	143	226	213	8038
XLOC_015157	16	40485807	40489769	-	23	26	17	19	14	14	31	25	15	14	17	15	29	22	19	17	26	12	25	18	29	18	22	13	25	11	43	25	28	12	18	40	44	4	12	23	765
XLOC_015218	16	44561743	44562492	-	4	7	3	5	6	4	0	4	6	3	4	3	3	2	3	4	4	2	2	4	3	2	5	4	2	6	3	8	2	2	0	4	1	1	1	4	121
XLOC_015232	16	45409531	45410229	-	2	1	2	2	8	5	2	4	7	1	2	2	6	2	0	2	8	5	11	2	9	0	2	5	2	2	6	4	14	9	7	11	6	1	9	7	168
XLOC_015233	16	45411419	45412041	-	0	1	1	2	1	2	2	2	3	4	3	1	1	6	1	1	4	5	6	3	8	2	2	2	1	1	11	2	5	4	2	3	8	5	6	1	112
XLOC_015251	16	47148694	47427358	-	64	66	84	79	102	95	87	66	90	78	96	73	91	80	86	88	110	86	59	79	106	61	103	81	93	84	111	132	113	93	93	97	98	97	107	86	3214
XLOC_015298	16	50547068	50547796	-	7	1	1	1	4	4	3	2	5	1	7	1	3	4	6	5	2	2	4	2	8	3	2	5	0	5	2	1	13	2	5	4	5	1	2	4	127
XLOC_015333	16	52394947	52395876	-	7	2	5	6	8	8	4	5	9	4	7	8	13	10	4	16	11	7	12	10	9	6	11	8	13	9	6	8	10	7	10	10	5	10	8	4	290
XLOC_015383	16	55056934	55172062	-	535	472	457	411	373	464	652	444	510	447	484	259	496	525	427	412	732	493	660	391	678	521	506	394	484	387	663	401	712	535	633	506	445	286	538	435	17768
XLOC_015384	16	55240175	55362925	-	746	640	636	642	627	634	785	546	653	622	766	476	700	632	680	610	1261	736	860	552	934	679	722	594	733	535	915	686	1021	642	775	688	704	449	714	567	25162
XLOC_015385	16	55363136	55363623	-	6	3	2	1	7	4	6	2	3	1	4	8	7	2	3	6	1	4	4	5	3	3	2	3	4	4	6	4	6	4	6	3	1	5	0	2	135
XLOC_015389	16	55480223	55481614	-	17	13	5	16	7	6	7	3	4	8	7	4	11	12	11	6	10	8	10	8	14	17	18	11	10	12	17	13	11	13	15	17	6	9	9	8	373
XLOC_015390	16	55481695	55485465	-	126	98	96	111	86	89	104	80	75	74	84	59	129	81	84	82	99	71	86	78	122	102	122	79	109	89	145	120	98	82	127	105	105	62	102	100	3461
XLOC_015420	16	56737331	56738348	-	7	9	7	5	7	10	12	10	9	5	8	4	11	9	4	9	15	5	3	5	9	13	8	7	6	15	7	10	11	10	8	14	8	3	8	5	296
XLOC_015442	16	56809875	56811023	-	3	2	2	1	9	1	4	1	1	1	0	3	6	3	1	1	4	1	4	5	1	0	0	2	6	21	2	3	2	4	1	4	2	6	0	8	115
XLOC_015457	16	58597080	58598102	-	4	3	6	4	2	2	3	2	2	3	5	3	1	10	6	3	4	3	3	2	4	5	9	2	5	4	6	3	6	2	2	4	10	3	2	2	140
XLOC_015478	16	62795682	62797235	-	1	3	5	2	1	9	3	5	0	1	17	3	1	3	1	0	2	2	4	4	8	3	7	0	2	4	5	0	6	7	2	4	3	0	19	2	139
XLOC_015480	16	62799748	62800815	-	3	2	0	2	2	3	6	4	1	2	15	2	5	0	3	2	0	3	3	2	11	0	4	2	3	3	2	1	2	3	0	3	6	0	8	1	109
XLOC_015481	16	62803536	62804485	-	7	4	2	1	3	2	5	8	4	5	16	4	7	2	2	6	3	1	8	4	9	2	11	2	2	3	3	2	3	5	6	8	3	3	15	5	176
XLOC_015486	16	62930263	63128092	-	98	95	82	85	120	122	71	102	104	112	102	106	92	105	82	87	192	111	88	93	129	78	127	107	85	102	106	143	157	151	93	111	118	85	103	104	3848
XLOC_015543	16	67180319	67190790	-	250	207	275	245	519	163	428	401	209	384	495	591	232	156	406	324	626	240	569	282	257	401	373	485	220	139	296	183	556	194	403	350	209	142	320	465	11995
XLOC_015590	16	74541251	74542059	-	8	3	5	5	10	3	3	6	2	1	2	1	6	8	5	3	5	4	4	13	5	2	4	2	3	3	7	6	10	4	3	9	6	2	2	4	169
XLOC_015597	16	74930545	74930821	-	45	38	60	43	48	37	82	47	51	66	70	65	80	92	60	85	96	45	110	43	53	44	58	51	80	87	39	85	68	53	91	83	94	78	92	67	2386
XLOC_015611	16	77395231	77409924	-	13	16	12	11	9	11	18	12	15	17	11	15	22	18	9	21	18	14	12	5	30	12	13	16	23	23	27	31	24	11	25	26	25	25	19	19	628
XLOC_015645	16	81031875	81032508	-	6	3	3	3	3	1	4	2	1	1	3	1	1	2	1	4	7	1	6	2	5	0	3	2	2	6	6	8	2	2	2	3	2	1	5	4	108
XLOC_015648	16	81033706	81034322	-	2	3	5	2	5	1	5	2	1	8	1	1	6	5	2	3	5	2	2	3	3	3	2	0	2	8	0	2	5	2	4	4	1	0	2	4	106
XLOC_015671	17	518343	518872	+	1	1	0	3	1	1	4	1	1	1	0	0	4	6	0	5	1	0	2	0	1	0	1	1	6	7	0	0	0	0	4	1	2	0	4	1	60
XLOC_015674	17	521432	521930	+	9	6	2	0	2	1	4	1	1	3	1	2	9	7	0	2	0	0	1	0	1	3	3	1	7	7	0	7	1	1	2	1	2	0	1	1	89
XLOC_015684	17	1937050	1937931	+	10	8	2	10	11	7	10	3	9	7	4	3	7	7	1	4	4	8	5	3	11	4	8	6	6	7	5	3	21	8	6	7	10	0	11	2	238
XLOC_015687	17	1955554	1956188	+	2	8	5	3	5	4	2	1	3	10	5	0	4	5	2	6	5	7	4	0	3	5	4	7	2	6	6	11	2	3	1	2	4	6	8	5	156
XLOC_015690	17	1957645	1958461	+	4	6	1	6	5	6	4	5	0	4	3	6	4	6	2	6	6	2	4	1	4	10	7	2	2	4	10	9	7	5	6	5	4	6	11	10	183
XLOC_015699	17	3632679	3653860	+	0	0	0	0	2	4	0	0	5	2	1	0	0	15	11	4	23	3	0	0	1	3	1	3	0	0	5	0	25	2	0	2	0	2	0	1	115
XLOC_015730	17	6692353	6693190	+	2	9	9	1	9	5	6	6	8	6	3	12	3	3	5	6	3	16	5	3	11	3	3	12	4	7	9	7	13	11	11	6	9	3	9	8	246
XLOC_015735	17	6713963	6730518	+	5	3	2	2	4	5	0	1	3	4	2	4	8	5	4	6	10	5	4	5	7	3	6	1	0	8	3	1	3	3	2	6	6	2	3	1	137
XLOC_015741	17	9095791	9153142	+	22	29	22	17	23	45	37	27	13	22	36	25	18	15	14	9	26	41	61	13	23	35	12	26	15	4	17	16	20	63	15	20	8	7	14	19	829
XLOC_015742	17	9113294	9113654	+	6	5	3	5	5	3	6	2	3	1	3	1	4	3	5	0	3	3	8	1	1	6	1	1	1	5	5	6	3	2	3	3	5	2	2	3	119
XLOC_015745	17	9153251	9156453	+	19	21	18	18	24	39	34	28	2	19	42	18	13	17	11	8	15	29	45	11	21	8	15	12	8	10	16	14	17	26	18	8	7	7	11	17	646
XLOC_015774	17	15173894	15174569	+	7	1	1	0	3	3	5	6	3	0	6	2	4	5	0	2	1	0	5	5	4	2	4	2	5	4	1	3	0	1	10	3	3	1	5	0	107
XLOC_015777	17	15175875	15177717	+	12	6	6	7	3	3	14	9	12	3	22	6	17	14	6	8	11	5	15	9	11	2	17	11	23	21	3	7	9	5	13	10	11	5	14	9	359
XLOC_015788	17	16457885	16459796	+	3	4	7	12	8	10	6	5	4	7	20	8	14	11	6	7	13	18	34	10	12	8	11	6	6	8	8	5	8	19	11	7	4	1	6	6	333
XLOC_015806	17	18687789	18688830	+	8	5	4	5	5	4	7	4	11	5	5	4	2	5	6	8	4	10	8	6	12	11	3	7	3	4	14	3	3	8	6	9	7	4	8	4	222
XLOC_015807	17	18689121	18689878	+	6	4	6	2	7	10	4	2	4	6	3	4	7	6	6	5	8	6	5	5	12	7	4	4	3	8	11	5	5	12	6	7	9	8	4	2	213
XLOC_015819	17	18805754	18806488	+	5	2	2	9	5	2	4	2	3	0	5	3	4	3	3	4	6	4	4	1	6	3	0	2	2	9	8	6	7	3	2	6	3	0	2	10	140
XLOC_015820	17	18806806	18807380	+	4	2	4	4	3	1	6	0	3	1	0	0	2	1	2	7	7	3	3	8	2	8	5	0	3	4	3	2	6	3	1	2	7	0	2	4	113
XLOC_015833	17	24427138	24428481	+	2	3	6	2	4	4	12	3	2	3	3	5	5	3	4	1	5	2	12	2	6	7	10	2	2	10	8	6	8	3	7	1	4	1	2	5	165
XLOC_015838	17	25306574	25307471	+	35	25	34	22	37	27	41	30	25	24	32	21	38	51	28	48	53	20	46	29	53	31	31	20	32	27	45	44	57	26	40	36	31	24	29	35	1227
XLOC_015852	17	27225701	27226401	+	7	1	3	2	1	5	3	0	8	0	4	0	3	8	6	0	2	3	1	1	5	4	8	1	3	1	2	3	1	3	1	1	1	3	5	2	102
XLOC_015853	17	27226829	27227733	+	9	1	11	4	6	4	0	1	7	6	6	1	2	9	5	0	6	5	2	0	7	2	5	2	3	4	8	5	10	4	6	2	6	3	6	1	159
XLOC_015861	17	29356646	29357306	+	2	2	0	1	6	5	3	0	4	2	1	1	6	5	5	2	3	3	1	0	7	5	3	3	1	0	6	0	2	4	2	1	7	1	1	0	95
XLOC_015862	17	29357516	29360269	+	8	7	3	8	6	6	6	9	7	5	7	2	7	9	4	7	9	10	10	3	15	7	2	5	4	5	22	4	6	7	8	7	7	0	11	3	246
XLOC_015865	17	29360673	29362350	+	9	6	2	13	6	6	8	4	13	7	4	4	6	5	11	5	10	17	10	13	20	12	4	5	5	10	8	1	9	7	16	4	14	2	10	5	291
XLOC_015885	17	30202911	30227914	+	9	7	4	5	5	3	5	11	4	3	6	3	16	9	11	4	8	4	7	8	9	8	8	7	11	10	10	12	3	9	19	7	10	7	10	7	279
XLOC_015891	17	34755294	34756518	+	3	2	5	1	7	3	7	2	5	8	4	3	4	4	0	4	8	6	7	3	7	2	4	2	10	6	6	3	10	8	5	9	4	3	9	1	175
XLOC_015896	17	35205727	35223876	+	88	40	47	57	47	61	109	49	60	62	64	43	77	60	54	56	87	90	120	55	111	61	79	70	82	45	71	35	99	80	108	80	72	23	72	61	2475
XLOC_015897	17	35217176	35219995	+	22	14	10	20	24	25	38	18	21	23	30	13	28	30	22	19	30	32	39	35	46	31	29	33	36	23	45	16	47	26	49	34	26	5	26	24	989
XLOC_015916	17	41208428	41209997	+	9	16	2	12	6	18	15	18	10	9	15	7	30	5	5	9	6	11	9	17	17	5	11	11	10	13	2	16	6	18	23	28	16	7	11	10	433
XLOC_015919	17	41307378	41311643	+	61	54	54	52	42	47	61	52	78	48	45	44	60	73	81	66	75	69	91	52	74	61	54	40	59	53	83	83	108	66	105	71	97	45	62	63	2329
XLOC_015921	17	41758870	41845280	+	907	760	739	679	601	417	1050	653	858	467	351	423	742	590	566	372	593	456	1068	462	1074	521	537	537	661	833	1274	842	697	443	891	867	918	431	495	625	24400
XLOC_015922	17	41759623	41760204	+	4	1	4	4	3	2	9	2	2	3	6	1	7	7	2	0	1	2	7	1	7	0	2	1	3	2	3	2	5	6	7	1	0	3	2	3	115
XLOC_015925	17	43463461	43464983	+	16	7	2	15	15	16	11	19	17	21	17	14	14	12	6	21	35	23	21	9	30	32	8	9	15	15	10	19	25	31	16	17	10	6	14	12	580
XLOC_015932	17	45039476	45040588	+	7	1	0	6	6	1	4	3	4	4	3	2	4	3	5	4	10	1	14	3	7	1	2	3	1	4	5	2	12	1	9	4	5	0	5	3	149
XLOC_015939	17	45191275	45225885	+	178	176	147	174	188	131	294	216	148	235	161	140	175	146	214	167	250	149	328	197	339	191	172	165	171	161	347	173	230	198	339	254	257	70	212	167	7260
XLOC_015953	17	46355377	46357248	+	16	9	12	9	3	13	21	11	12	10	5	8	12	11	7	11	17	7	8	12	16	13	9	13	16	22	11	12	26	10	12	17	8	5	10	9	423
XLOC_015961	17	46362147	46362982	+	4	5	6	1	5	5	7	6	7	4	4	6	5	5	9	1	5	1	3	6	7	5	6	4	8	2	9	1	4	8	5	9	7	2	5	2	179
XLOC_015962	17	46363036	46364636	+	7	11	9	10	6	9	5	7	7	7	12	8	12	9	7	12	18	11	13	19	21	22	10	10	17	10	14	16	15	9	14	17	12	6	10	12	414
XLOC_016019	17	55819448	55820573	+	7	2	5	3	5	5	5	7	6	8	8	2	4	7	7	3	6	6	9	13	3	5	4	3	2	5	2	8	4	3	6	8	5	2	6	4	188
XLOC_016022	17	55823729	55824259	+	2	1	1	1	2	7	4	2	2	6	6	1	2	0	6	8	2	7	7	6	3	6	2	2	7	2	5	2	0	5	6	6	3	1	5	8	136
XLOC_016023	17	55826107	55826906	+	7	2	2	4	5	2	8	4	4	1	6	1	6	4	1	2	7	3	5	6	7	6	2	5	6	3	6	10	3	6	4	3	4	2	0	3	150
XLOC_016024	17	55827631	55828302	+	4	4	2	7	2	5	6	2	1	2	12	3	1	1	5	3	0	4	6	6	0	7	3	1	5	4	0	2	0	3	1	2	6	4	1	4	119
XLOC_016027	17	55830293	55831041	+	3	6	1	6	6	4	6	0	4	4	7	4	2	6	2	5	7	5	6	4	3	0	5	1	0	3	5	5	0	5	2	4	0	2	0	2	125
XLOC_016031	17	55835314	55835880	+	4	3	2	7	2	5	4	6	2	7	2	3	1	0	7	5	3	2	3	5	4	5	4	4	2	3	2	1	6	1	5	4	6	2	2	5	129
XLOC_016033	17	55837007	55838263	+	4	2	8	11	12	4	2	8	5	8	8	4	2	4	10	14	5	3	6	6	8	11	6	5	3	4	10	5	3	1	8	1	2	0	1	3	197
XLOC_016067	17	59422632	59422905	+	5	3	2	5	3	9	1	5	6	5	3	2	4	5	5	2	4	4	3	6	7	2	5	5	5	6	5	0	4	4	4	6	3	0	4	9	151
XLOC_016101	17	63013315	63014218	+	4	7	6	5	5	2	3	8	2	0	2	5	5	2	8	0	9	1	4	8	6	0	6	6	4	1	8	11	9	2	4	5	1	0	3	5	157
XLOC_016110	17	63437063	63438038	+	6	1	7	0	4	0	6	2	10	3	3	2	2	5	2	4	4	10	5	2	5	2	7	1	3	2	9	2	4	4	3	3	0	3	3	3	132
XLOC_016125	17	64482307	64483273	+	9	10	5	9	9	13	3	6	2	1	4	0	9	5	2	7	14	3	5	2	6	1	4	2	3	9	8	6	6	8	2	2	5	0	2	8	190
XLOC_016131	17	64537633	64544131	+	88	106	59	95	73	168	76	62	96	92	195	128	94	140	87	188	320	225	133	58	115	67	70	85	97	63	72	61	199	225	69	83	85	11	61	68	3914
XLOC_016133	17	64551944	64552841	+	8	15	3	6	8	18	8	10	12	4	28	10	6	6	3	18	19	19	27	9	18	5	9	8	6	8	2	12	29	22	12	17	8	7	9	10	419
XLOC_016141	17	64743084	64744041	+	46	35	26	29	36	28	48	41	31	33	30	47	48	36	24	50	46	34	47	34	46	37	35	34	54	44	39	41	59	42	43	43	28	47	36	35	1412
XLOC_016142	17	64744097	64744471	+	4	5	4	4	3	4	6	6	4	7	7	2	7	6	4	4	3	2	6	7	5	2	5	5	5	3	4	7	12	8	5	5	10	7	8	7	193
XLOC_016144	17	64811521	64811726	+	4	1	1	0	6	5	1	0	4	0	4	5	3	4	0	0	1	4	1	2	6	5	1	2	1	0	1	0	0	11	9	0	5	12	1	2	102
XLOC_016158	17	65204765	65206525	+	11	10	6	21	4	18	2	11	4	13	6	3	4	9	7	16	16	8	4	16	11	15	6	6	6	11	12	9	10	18	10	24	11	2	5	12	357
XLOC_016203	17	68524676	68531001	+	29	17	51	35	31	22	37	40	18	24	56	49	31	34	42	50	34	38	52	30	41	22	43	18	17	37	31	40	50	38	49	39	38	22	33	36	1274
XLOC_016204	17	68555779	68558173	+	9	1	4	4	11	1	4	26	3	5	3	0	3	7	5	3	11	5	10	5	2	14	6	5	1	3	6	4	5	4	5	17	2	4	7	3	208
XLOC_016214	17	69622894	69623575	+	4	6	3	1	2	3	4	1	8	7	7	1	7	1	1	1	5	3	5	2	6	1	2	3	3	6	6	2	10	4	5	0	7	9	3	5	144
XLOC_016216	17	69654479	69665083	+	78	39	64	51	51	43	83	63	42	32	63	49	87	46	59	29	91	52	101	46	70	56	70	35	70	41	89	29	88	50	90	53	54	17	50	32	2063
XLOC_016222	17	70349750	70350851	+	7	0	0	4	4	4	7	5	4	5	2	5	8	4	2	1	3	1	2	3	6	3	2	6	3	2	3	13	1	5	7	8	5	1	1	6	143
XLOC_016225	17	70541572	70542364	+	8	8	4	10	5	8	27	13	17	6	3	7	8	1	5	8	10	15	9	14	10	9	11	7	9	5	1	5	9	8	16	9	2	1	7	9	304
XLOC_016232	17	70783510	70795615	+	66	54	31	57	44	40	33	29	41	45	68	23	51	26	25	26	36	34	38	26	79	39	71	33	56	43	29	39	43	40	39	32	76	28	43	36	1519
XLOC_016233	17	70786091	70786944	+	6	4	2	10	6	3	6	7	1	3	5	3	6	0	5	8	3	4	2	3	4	2	3	7	6	10	4	4	7	4	5	4	5	2	8	6	168
XLOC_016234	17	70787875	70789062	+	14	10	1	17	11	9	6	7	4	7	13	1	13	3	3	2	7	4	5	6	12	7	9	5	8	6	9	8	7	7	7	4	11	1	5	4	253
XLOC_016236	17	70790009	70791015	+	13	5	2	8	9	6	4	0	4	3	11	0	6	2	5	5	4	2	2	6	8	9	8	5	12	4	4	8	1	11	5	1	11	5	7	11	207
XLOC_016237	17	70791243	70791772	+	6	5	0	7	2	6	1	1	3	0	6	0	3	1	2	3	1	5	2	2	5	2	7	2	3	2	1	3	6	4	1	1	7	0	0	2	102
XLOC_016240	17	70839200	70847654	+	0	7	9	9	4	14	14	16	0	13	4	3	3	8	3	5	8	7	2	2	3	3	3	3	3	16	6	14	9	25	7	14	3	5	9	2	256
XLOC_016285	17	73187602	73188971	+	5	5	2	3	3	2	7	14	0	4	1	3	9	13	9	8	6	1	10	4	1	1	4	5	1	9	9	3	8	9	4	17	3	7	6	5	201
XLOC_016300	17	73453402	73455854	+	7	3	1	11	1	3	2	6	11	10	15	4	5	7	2	9	1	11	3	5	6	8	13	4	7	2	3	8	7	6	3	3	4	1	7	5	204
XLOC_016306	17	73471009	73471316	+	3	7	0	11	1	3	0	1	11	2	7	1	3	3	0	10	3	6	0	4	4	2	6	3	11	0	0	8	5	5	0	8	3	0	4	3	138
XLOC_016307	17	73472531	73473679	+	16	10	11	14	5	10	22	7	20	12	21	1	8	6	16	21	14	15	16	13	10	16	15	13	11	4	4	15	7	16	10	13	6	4	12	9	423
XLOC_016308	17	73474229	73476073	+	21	26	8	23	22	13	31	19	28	13	24	20	14	14	12	30	13	26	19	17	26	23	36	22	18	6	6	21	20	20	22	16	16	2	21	22	690
XLOC_016311	17	73479994	73481212	+	11	18	6	17	5	5	1	11	11	4	18	6	3	13	3	14	5	11	15	5	13	6	20	8	4	4	8	7	12	3	5	4	0	5	6	6	293
XLOC_016319	17	73972399	73973568	+	4	2	6	3	9	3	9	3	2	8	8	1	9	5	2	3	5	2	1	4	1	5	6	10	4	4	6	7	5	5	3	5	4	5	11	2	172
XLOC_016346	17	74335533	74335963	+	6	5	7	5	1	4	2	8	4	3	3	0	3	1	4	2	0	1	0	3	1	2	4	5	5	1	1	7	2	4	0	1	6	1	4	3	109
XLOC_016354	17	74382417	74383462	+	4	4	5	6	1	4	10	3	3	1	1	1	3	5	0	1	7	3	5	2	4	1	1	5	3	3	2	6	9	7	6	2	2	4	2	5	131
XLOC_016378	17	74645752	74646621	+	5	9	2	3	0	1	5	3	8	3	6	2	3	3	4	1	5	4	3	8	7	4	0	2	3	1	2	8	7	9	3	11	3	1	3	5	147
XLOC_016385	17	74807024	74807270	+	8	9	5	5	3	4	4	4	5	3	10	0	4	6	8	4	7	0	14	4	9	7	6	4	3	6	8	7	3	2	13	7	1	0	5	3	191
XLOC_016387	17	74881144	74881684	+	4	1	1	6	3	4	3	7	2	3	8	0	3	3	5	1	2	4	8	2	6	3	3	3	2	3	4	5	9	5	1	5	7	4	5	2	137
XLOC_016390	17	74916530	74919891	+	31	20	8	21	9	21	22	16	17	18	15	17	23	16	16	23	27	15	16	20	31	25	21	15	27	14	23	12	14	20	27	23	24	10	6	13	676
XLOC_016395	17	74978657	74979595	+	9	2	7	6	2	7	11	7	6	2	9	9	9	3	7	6	8	6	6	7	4	4	5	6	10	3	7	7	5	7	11	22	7	3	7	5	242
XLOC_016396	17	74979782	74980377	+	5	7	5	2	3	3	4	1	3	5	1	3	5	2	4	1	5	4	5	0	6	6	6	5	5	7	5	5	7	1	5	2	8	6	3	6	151
XLOC_016415	17	1934972	1935565	-	4	7	1	5	2	3	9	3	3	5	4	3	4	6	2	5	7	4	5	14	4	3	4	0	4	7	1	10	5	4	7	7	7	2	5	7	173
XLOC_016419	17	2614962	2617580	-	20	7	9	7	7	18	21	8	28	10	30	19	35	13	12	11	10	34	31	10	19	6	27	10	31	10	16	3	22	12	11	23	22	13	21	15	601
XLOC_016423	17	2648474	2793691	-	927	330	390	335	738	420	446	234	654	653	704	581	744	993	436	259	674	570	563	353	1067	572	787	557	750	678	971	345	844	425	516	511	944	508	840	629	21948
XLOC_016436	17	2777812	2778495	-	5	2	2	1	4	3	5	5	4	1	3	3	3	4	2	0	4	0	3	3	4	7	3	1	3	7	2	1	5	3	3	10	5	9	7	4	131
XLOC_016453	17	4458946	4460778	-	0	13	4	8	2	7	13	12	7	8	8	6	12	4	2	18	5	12	8	4	16	10	6	2	4	9	6	9	10	24	9	4	11	4	3	5	285
XLOC_016463	17	4478611	4495951	-	17	22	21	43	16	30	54	53	21	53	33	36	34	22	20	54	58	56	72	33	68	28	27	25	24	35	42	43	82	48	33	68	52	20	29	44	1416
XLOC_016469	17	4494345	4495306	-	5	16	3	7	5	6	4	3	3	4	5	5	3	1	5	6	2	10	2	5	4	9	6	3	10	6	8	17	8	7	4	6	4	9	3	8	212
XLOC_016476	17	5054733	5056133	-	1	18	2	6	7	1	12	2	3	8	0	2	10	5	1	9	7	3	3	7	18	1	3	0	5	3	4	6	6	2	6	12	14	5	7	11	210
XLOC_016480	17	5101535	5105545	-	72	43	64	47	34	68	115	70	44	50	49	56	68	78	55	43	70	74	133	62	90	48	41	67	75	64	100	63	105	104	109	75	91	52	47	63	2489
XLOC_016487	17	6689365	6690441	-	7	5	5	6	2	2	10	4	4	3	8	2	3	6	4	3	15	2	6	8	5	6	7	4	6	5	6	0	5	5	3	2	3	0	0	1	163
XLOC_016507	17	9053014	9053585	-	3	4	1	4	1	3	9	7	0	6	6	3	4	3	3	3	0	4	7	1	4	3	0	3	2	2	1	2	4	0	5	2	2	1	5	3	111
XLOC_016528	17	9560462	9561309	-	8	2	7	3	4	4	8	0	2	2	5	2	10	7	2	1	3	7	13	4	4	5	2	8	12	5	3	2	4	8	6	3	0	3	4	4	167
XLOC_016548	17	9657755	9658482	-	11	9	10	5	9	10	15	8	7	6	10	4	13	5	9	3	9	13	9	6	9	13	10	6	10	6	15	10	10	19	8	14	6	7	6	9	329
XLOC_016553	17	9692652	9735905	-	157	248	215	318	202	286	288	301	245	270	289	177	140	155	228	198	263	306	222	206	317	230	215	264	135	181	343	249	243	487	188	307	277	105	175	284	8714
XLOC_016554	17	9703371	9705103	-	9	12	18	21	9	17	23	19	15	9	8	9	7	17	7	11	14	24	15	17	25	16	6	18	15	11	21	12	7	40	9	22	12	6	6	23	530
XLOC_016557	17	10176421	10176986	-	0	0	4	3	3	0	3	1	4	10	3	0	1	9	0	2	8	2	0	2	5	2	5	0	1	1	5	1	9	6	3	1	1	2	1	2	100
XLOC_016563	17	10601673	10610618	-	5	12	9	9	8	4	8	11	9	7	5	9	7	10	5	8	13	10	10	7	15	4	6	10	10	4	6	11	12	10	10	13	7	9	6	5	304
XLOC_016584	17	13280060	13280538	-	17	17	18	15	18	22	15	12	17	17	21	27	17	19	24	22	29	21	19	18	23	23	14	21	19	18	30	18	33	13	18	23	19	15	19	24	715
XLOC_016585	17	13281014	13287490	-	16	21	27	33	30	12	14	34	28	26	40	24	20	37	22	21	30	34	18	27	53	27	18	22	27	24	32	26	33	31	26	29	37	16	29	28	972
XLOC_016613	17	17955917	17956718	-	4	4	5	7	3	3	13	2	0	9	9	3	4	4	4	4	2	3	5	6	8	3	8	3	5	8	8	6	1	3	2	7	5	6	8	6	181
XLOC_016621	17	18607104	18610388	-	32	33	35	26	51	40	47	27	35	33	37	23	44	29	31	33	40	27	34	32	46	42	35	26	46	30	50	31	47	27	42	24	32	8	42	37	1254
XLOC_016622	17	18610532	18611405	-	6	1	3	3	8	2	7	3	7	7	1	0	1	5	2	1	3	0	2	3	4	9	3	6	8	8	2	3	6	3	10	5	10	1	0	2	145
XLOC_016625	17	18776231	18785282	-	8	2	4	3	8	8	3	3	2	3	4	5	8	5	5	2	6	1	5	6	4	2	5	4	8	2	6	8	4	6	2	9	5	6	6	2	170
XLOC_016672	17	34739343	34745434	-	41	41	26	31	49	62	64	50	46	33	64	27	68	50	21	26	71	59	68	32	58	26	46	31	66	30	43	25	75	57	53	49	34	7	51	39	1619
XLOC_016699	17	40698904	40700845	-	5	4	2	0	17	2	0	3	0	0	0	1	9	1	5	5	9	0	0	3	1	1	0	10	3	27	2	5	2	1	1	2	0	2	0	7	130
XLOC_016704	17	40704693	40706060	-	3	5	7	0	19	0	2	2	3	3	0	4	5	0	3	1	1	0	1	4	0	3	0	11	1	14	0	9	2	3	3	4	5	3	1	12	134
XLOC_016710	17	40711173	40712043	-	0	1	1	0	13	2	0	0	0	0	0	0	1	1	3	6	7	0	1	0	0	0	0	1	0	6	0	1	1	1	2	1	0	1	0	4	54
XLOC_016715	17	40718875	40720581	-	2	5	2	0	26	0	0	3	0	0	0	1	2	0	1	2	2	0	0	2	0	0	0	8	1	27	2	7	1	0	2	1	1	1	0	4	103
XLOC_016717	17	40721279	40722675	-	1	5	1	0	21	3	2	5	0	1	1	2	4	0	2	5	7	1	4	2	2	2	0	9	0	22	4	5	2	2	1	2	1	2	0	3	124
XLOC_016719	17	40723866	40725791	-	1	9	5	0	21	0	0	5	2	1	0	4	10	0	6	4	6	0	1	2	3	2	0	3	2	29	2	11	3	1	4	4	5	8	0	1	155
XLOC_016732	17	40742207	40744288	-	0	1	1	0	26	0	0	8	0	0	0	8	3	1	0	7	7	1	0	1	0	0	0	3	1	38	4	12	3	4	5	3	1	2	0	9	149
XLOC_016740	17	40750183	40750884	-	3	3	6	3	11	1	1	0	2	6	0	4	2	0	1	1	3	1	3	2	1	6	0	3	3	8	5	9	3	3	5	3	0	3	1	4	110
XLOC_016744	17	41248611	41249432	-	6	2	7	3	6	4	14	11	1	2	2	7	9	3	4	4	2	7	9	10	8	5	3	9	14	3	3	9	4	14	7	10	9	1	7	5	224
XLOC_016751	17	42998256	43205791	-	6	7	2	2	12	13	12	18	7	6	2	4	7	7	6	11	14	71	20	7	9	8	5	6	7	14	17	6	10	24	12	5	2	5	8	9	381
XLOC_016759	17	44963519	44995897	-	424	329	246	351	394	333	546	392	372	351	388	209	400	426	346	334	598	377	571	404	667	404	372	337	434	420	597	282	529	461	611	490	492	117	435	337	14776
XLOC_016762	17	44993175	44993665	-	6	3	3	3	3	2	4	4	3	3	2	0	4	1	0	3	6	1	4	1	7	4	2	1	8	5	3	3	5	6	7	3	2	0	3	1	116
XLOC_016776	17	45373838	45375094	-	11	8	10	12	18	5	17	14	12	8	7	8	15	4	11	4	10	13	10	5	8	10	9	14	19	20	23	10	10	6	14	11	12	13	9	17	407
XLOC_016814	17	53719398	53721248	-	15	9	16	8	9	11	16	7	10	16	9	3	14	4	11	17	16	10	15	9	14	7	7	3	13	18	22	6	14	9	10	16	17	3	5	8	397
XLOC_016818	17	53724888	53725715	-	8	5	4	2	2	4	6	0	4	1	0	2	5	4	4	3	3	2	4	5	8	2	4	1	4	4	11	3	0	5	3	5	4	1	3	0	126
XLOC_016835	17	54568116	54581446	-	78	74	57	72	47	69	67	54	62	54	55	62	68	87	81	71	74	67	72	55	107	74	72	64	70	83	86	134	67	78	77	78	84	91	91	73	2655
XLOC_016869	17	55845807	55853507	-	23	71	15	79	44	36	20	43	51	43	80	19	30	63	19	122	41	33	15	41	59	75	82	39	30	47	35	53	56	34	17	15	35	5	33	31	1534
XLOC_016875	17	55893689	55894432	-	3	5	2	4	2	0	6	1	0	3	3	2	4	5	2	4	2	8	5	0	4	3	2	5	0	7	5	3	10	1	4	1	5	1	1	6	119
XLOC_016876	17	55894601	55895603	-	2	3	2	6	4	0	5	2	1	4	3	4	2	3	2	4	6	10	10	3	2	2	2	5	0	1	7	2	18	7	10	9	2	4	1	3	151
XLOC_016879	17	56018392	56018811	-	3	4	2	3	3	4	1	3	5	0	2	1	2	4	3	5	11	6	1	3	4	4	4	2	6	1	1	2	3	7	1	3	4	0	0	0	108
XLOC_016882	17	56110305	56118416	-	24	25	22	29	31	35	48	45	22	38	63	21	30	20	24	24	35	26	64	20	54	20	24	14	33	26	42	40	38	56	28	45	45	20	38	21	1190
XLOC_016890	17	56455246	56458317	-	106	72	81	80	78	78	91	77	56	75	104	112	117	99	73	106	117	97	103	71	106	72	87	88	125	82	96	96	122	125	117	105	94	69	96	96	3369
XLOC_016893	17	56515084	56516302	-	7	2	1	1	4	4	7	4	5	7	4	1	3	5	4	10	8	4	3	3	5	1	3	4	7	3	8	6	8	8	4	0	2	4	16	2	168
XLOC_016910	17	57348897	57358295	-	56	40	48	44	33	38	50	48	56	48	54	39	37	43	47	58	82	57	52	38	88	47	47	26	47	39	61	41	64	46	50	57	69	24	50	40	1764
XLOC_016917	17	57994758	57995386	-	5	2	1	0	2	1	0	2	1	4	3	3	7	16	1	2	3	1	4	0	1	11	0	5	10	9	2	3	2	2	4	4	2	1	1	4	119
XLOC_016920	17	58118423	58120012	-	10	0	0	0	0	0	3	3	0	20	1	10	16	64	0	0	1	0	3	3	0	40	0	34	15	31	0	0	0	2	3	4	0	5	0	19	287
XLOC_016921	17	58123526	58294879	-	19	0	1	1	0	1	6	5	0	59	4	44	56	196	3	0	7	0	15	11	1	112	1	110	61	117	0	2	2	2	5	5	1	31	0	87	965
XLOC_016922	17	58194667	58195114	-	1	0	0	0	0	0	0	0	0	1	0	5	3	11	0	0	0	0	0	0	0	6	0	7	5	8	0	0	0	0	0	0	0	4	0	8	59
XLOC_016938	17	62323605	62327146	-	19	9	21	14	13	19	12	13	19	4	8	5	18	13	10	1	8	18	20	15	18	14	8	5	19	24	13	9	14	30	15	27	23	12	9	5	504
XLOC_016940	17	63023040	63023448	-	0	0	4	0	1	2	1	6	3	6	4	6	0	3	3	0	5	4	0	3	3	6	1	4	1	1	5	0	4	4	6	6	2	6	0	6	106
XLOC_016947	17	63354297	63355419	-	8	7	12	7	8	10	12	8	14	10	5	8	5	12	3	6	9	7	3	5	17	11	9	12	8	2	13	13	20	9	11	14	18	10	14	8	348
XLOC_016948	17	63355493	63356072	-	2	6	4	4	1	4	9	4	5	4	3	6	2	8	0	2	7	2	3	2	9	2	4	10	3	2	5	2	2	4	5	2	5	2	4	9	148
XLOC_016958	17	64003154	64005152	-	15	12	7	8	14	4	8	9	8	10	16	4	12	5	10	4	13	4	11	10	14	6	12	12	9	7	11	7	16	7	9	13	12	4	8	9	340
XLOC_016967	17	64705521	64706429	-	2	0	1	0	1	3	3	4	0	3	11	2	7	12	0	2	8	4	14	0	6	6	1	2	4	1	4	1	31	5	3	2	0	5	3	0	151
XLOC_016977	17	64990715	64994262	-	60	31	27	47	37	73	36	44	33	39	42	19	55	29	26	33	31	42	43	40	51	27	30	25	48	29	43	30	50	45	47	39	45	13	29	21	1359
XLOC_016997	17	65860101	65862225	-	4	5	8	1	10	4	9	3	6	0	21	7	3	16	10	0	9	5	8	5	8	0	19	12	2	12	11	1	16	5	16	11	3	1	23	8	282
XLOC_017024	17	70549185	70550159	-	2	3	2	5	6	3	10	11	11	10	15	6	8	1	2	6	6	6	10	4	17	5	7	2	6	5	1	7	1	4	15	7	4	5	5	5	223
XLOC_017089	17	73414667	73419712	-	86	175	39	121	89	57	178	159	169	69	221	38	82	119	90	388	120	141	209	116	84	120	316	116	106	27	51	63	123	76	122	57	69	10	108	92	4206
XLOC_017092	17	73455316	73456080	-	10	11	5	6	4	7	14	17	13	4	10	0	11	9	3	10	3	6	20	8	14	5	18	7	5	2	10	8	5	4	13	8	8	3	11	14	306
XLOC_017140	17	74555203	74555951	-	2	8	4	2	4	4	7	0	4	2	3	6	6	2	4	6	1	6	5	3	3	2	2	2	2	4	6	6	7	6	9	1	3	1	5	4	142
XLOC_017152	17	74659887	74660722	-	4	5	2	2	4	2	5	2	0	5	4	4	4	11	4	5	4	3	2	1	7	1	9	5	2	4	9	7	0	3	7	3	6	0	3	2	141
XLOC_017165	17	75036894	75039008	-	213	162	164	134	115	123	166	116	168	111	157	151	227	139	138	123	179	124	175	129	220	161	177	153	199	147	188	221	175	118	177	150	176	179	183	190	5828
XLOC_017190	18	1682012	1682314	+	3	3	1	2	11	4	1	5	8	3	1	4	10	4	4	3	9	3	0	6	10	5	4	6	9	1	4	4	10	5	1	5	2	1	4	5	161
XLOC_017193	18	1791351	1850938	+	1845	1260	1407	1258	1311	1325	2675	1775	1173	1609	2131	1659	2093	1117	1476	1102	1624	1369	2943	1348	1998	1361	1498	1487	2058	1127	2023	1713	1509	1676	2466	2131	1600	1564	1792	1559	60062
XLOC_017194	18	1791420	1792441	+	7	7	3	8	3	5	3	6	6	5	4	1	9	5	9	7	6	7	5	2	5	5	8	10	1	12	7	2	7	5	8	6	13	2	6	6	211
XLOC_017199	18	1798259	1799879	+	9	7	5	4	10	5	7	9	8	9	13	1	18	3	9	8	19	13	10	11	20	5	13	7	10	10	14	7	6	9	7	10	16	3	4	10	329
XLOC_017213	18	2792486	2792908	+	8	8	1	5	7	4	3	7	9	6	5	13	9	4	5	13	6	8	10	6	3	3	4	2	3	7	7	9	9	15	9	6	10	6	4	5	239
XLOC_017226	18	2993825	2994458	+	6	5	3	4	6	8	8	3	8	7	1	1	5	4	4	3	7	2	6	3	10	11	5	2	5	2	5	1	6	4	3	2	3	2	4	8	167
XLOC_017227	18	2994551	2995199	+	5	7	2	7	2	6	4	8	4	6	4	2	10	7	5	4	4	2	5	2	5	3	2	4	2	5	2	6	4	2	7	4	5	2	1	6	156
XLOC_017263	18	8778594	8779448	+	5	3	7	1	3	2	10	1	5	5	6	1	0	7	8	1	5	5	6	5	13	1	3	7	3	4	3	2	4	4	4	5	2	0	3	3	147
XLOC_017264	18	8779578	8780183	+	1	2	2	6	4	4	6	5	4	2	2	3	5	3	7	1	5	6	6	3	8	10	4	2	8	6	7	0	7	3	6	3	10	3	2	1	157
XLOC_017265	18	8780369	8782285	+	13	6	9	18	8	7	10	13	6	12	12	12	14	14	17	16	26	14	22	9	29	7	15	7	10	5	17	12	23	17	16	19	20	5	16	26	502
XLOC_017267	18	9189445	9189703	+	3	4	4	5	5	8	12	4	11	7	3	2	6	4	7	1	2	12	17	2	10	9	0	1	4	4	11	6	4	11	7	6	6	3	5	4	210
XLOC_017279	18	10527043	10528003	+	6	6	1	12	3	3	5	6	11	4	5	5	5	12	2	8	7	4	3	8	11	4	11	7	7	15	7	10	5	3	9	4	11	11	5	8	244
XLOC_017280	18	10587700	10588519	+	2	1	2	0	4	3	5	6	5	4	2	0	6	4	0	2	4	0	4	5	7	1	6	2	5	1	5	1	4	1	1	2	4	0	1	1	101
XLOC_017284	18	10591817	10592931	+	7	4	0	7	2	5	6	3	6	4	4	1	3	4	4	4	13	5	14	2	9	3	1	3	8	4	6	3	3	1	8	7	10	0	6	5	175
XLOC_017285	18	10592982	10609016	+	55	58	36	62	43	54	111	51	66	49	48	34	81	31	36	72	88	44	102	31	122	51	78	44	77	64	93	29	78	46	72	67	71	15	66	43	2168
XLOC_017290	18	10943765	10945589	+	16	9	6	13	5	6	15	9	16	11	11	5	11	11	6	12	5	17	15	17	17	10	16	15	11	9	8	13	9	10	17	14	20	7	9	8	409
XLOC_017295	18	11059533	11060117	+	13	6	3	5	1	3	1	1	1	1	4	0	1	5	3	4	2	2	1	3	6	4	3	1	6	3	3	2	5	3	0	1	4	1	1	2	105
XLOC_017296	18	11060327	11061844	+	20	9	3	12	15	3	4	7	7	7	6	5	6	12	11	7	8	4	4	15	9	15	11	13	5	5	23	8	8	8	4	10	8	10	4	7	313
XLOC_017298	18	11067384	11068348	+	11	0	4	5	7	5	0	1	7	2	5	1	6	6	2	6	3	2	0	2	6	5	4	4	4	6	7	0	4	2	1	8	10	1	5	4	146
XLOC_017310	18	12966448	12966986	+	6	5	0	3	2	5	2	4	1	0	2	4	3	3	1	3	5	7	8	1	6	3	2	2	4	2	1	1	3	0	3	3	7	0	2	0	104
XLOC_017311	18	12967215	12968513	+	7	6	10	3	4	7	10	5	9	11	11	6	13	5	5	7	4	8	11	3	12	4	3	8	7	7	3	2	14	18	11	4	2	2	9	12	263
XLOC_017352	18	14489811	14490845	+	6	6	4	5	1	6	5	4	9	6	6	1	8	5	1	2	7	9	13	3	13	0	5	7	2	9	11	8	2	4	8	8	10	5	7	5	211
XLOC_017360	18	14599575	14607981	+	4	3	2	4	1	2	2	5	2	1	2	4	3	8	3	3	10	2	4	4	6	3	5	2	8	3	8	1	4	1	6	2	4	3	1	4	130
XLOC_017365	18	14622023	14623418	+	9	11	7	4	11	4	7	3	8	4	7	3	4	7	12	2	6	5	7	4	12	4	6	7	5	6	8	5	7	9	8	8	9	10	2	2	233
XLOC_017366	18	14624389	14624966	+	4	4	5	4	1	1	1	2	5	5	1	1	3	1	3	2	5	3	5	1	8	5	1	5	3	3	7	3	5	7	6	7	4	5	2	2	130
XLOC_017367	18	14625598	14627102	+	7	5	3	5	4	7	6	5	7	4	9	4	9	7	6	4	12	8	5	3	12	4	3	10	10	10	9	11	11	7	6	13	4	2	2	6	240
XLOC_017370	18	14629681	14630755	+	12	6	6	13	7	9	5	5	4	3	8	7	13	7	8	7	7	4	7	4	15	11	9	10	13	14	14	9	8	12	10	13	13	2	10	7	312
XLOC_017385	18	15219332	15236948	+	8	21	14	13	17	13	31	35	11	20	16	21	15	32	20	14	28	29	44	16	23	15	14	24	16	7	31	17	22	31	24	28	20	23	10	22	745
XLOC_017393	18	15242949	15244670	+	4	9	9	10	9	6	9	16	8	14	10	6	8	13	3	9	5	6	22	5	12	5	7	9	9	20	12	5	19	19	9	23	6	3	1	6	346
XLOC_017404	18	16160672	16161223	+	4	0	1	1	1	2	10	2	1	3	1	1	6	2	1	4	1	1	2	6	7	5	6	4	4	2	0	1	6	1	1	3	5	2	5	2	104
XLOC_017422	18	18734484	18735490	+	2	8	4	5	5	6	4	7	10	5	10	6	5	3	1	3	6	9	4	3	3	6	6	3	6	6	8	6	9	8	5	6	1	2	3	3	187
XLOC_017436	18	21435434	21436208	+	25	14	22	28	21	31	21	13	20	25	19	8	27	21	21	17	39	26	22	19	26	23	17	20	22	28	28	21	15	22	17	21	17	17	23	11	767
XLOC_017459	18	21725432	21726147	+	7	2	3	6	8	2	2	5	3	0	3	1	3	1	5	0	4	2	2	2	13	2	7	5	2	4	5	6	2	3	3	1	6	2	2	2	126
XLOC_017467	18	22696202	22697669	+	9	4	8	7	5	7	6	7	8	7	14	3	6	6	6	4	7	11	19	8	8	4	9	9	7	5	10	2	6	7	7	3	5	3	7	8	252
XLOC_017469	18	22698698	22700530	+	13	10	8	12	4	8	10	7	11	10	16	8	12	6	13	6	10	13	13	6	10	8	17	12	17	7	26	7	10	6	8	12	5	5	4	10	360
XLOC_017472	18	22702890	22703672	+	3	6	7	2	2	5	2	3	4	2	2	3	3	6	5	2	0	6	7	3	3	0	6	4	3	3	4	1	5	2	4	2	4	0	3	3	120
XLOC_017478	18	23309067	23309392	+	14	9	12	6	4	14	5	12	7	8	7	9	10	13	6	5	7	12	13	10	8	2	17	7	16	5	12	11	7	7	10	7	7	1	6	11	317
XLOC_017494	18	23934727	23935522	+	3	2	2	1	6	1	9	4	3	3	1	2	2	1	2	2	2	4	8	0	5	3	3	7	2	11	10	4	12	5	3	7	5	4	3	10	152
XLOC_017536	18	26046968	26047811	+	3	11	1	9	4	0	2	5	0	8	1	0	1	1	2	7	5	0	5	0	6	5	1	1	3	5	3	4	5	2	1	1	2	4	2	6	116
XLOC_017552	18	34360837	34361725	+	7	2	4	2	3	6	9	7	3	5	2	2	16	1	1	2	8	13	4	5	15	8	6	3	10	2	5	2	3	5	3	13	1	9	5	2	194
XLOC_017573	18	34914208	34916834	+	26	20	14	16	14	25	27	21	18	20	34	17	50	15	18	39	23	11	37	14	45	24	19	24	23	19	25	14	31	14	31	30	27	1	17	14	817
XLOC_017624	18	36600876	36602886	+	9	7	13	15	3	7	14	10	10	8	12	6	12	3	13	6	8	5	5	2	8	3	6	4	10	7	6	19	8	8	5	6	8	8	13	9	296
XLOC_017626	18	36611328	36614607	+	211	229	265	193	159	130	342	156	190	212	171	169	206	155	225	120	222	140	192	174	308	220	232	202	198	166	308	264	179	144	282	176	250	134	199	198	7321
XLOC_017628	18	36618309	36618884	+	5	4	5	3	3	0	8	1	5	5	5	1	4	3	3	1	6	6	10	2	8	3	4	1	5	4	3	7	3	3	5	3	1	0	6	5	141
XLOC_017647	18	38176505	38177104	+	7	1	0	5	5	6	10	1	3	7	9	5	8	8	7	9	10	7	8	9	6	6	7	5	7	5	5	5	9	13	6	9	5	3	5	4	225
XLOC_017654	18	39210926	39211741	+	4	3	4	8	0	5	3	6	1	5	6	1	4	4	1	2	4	8	0	4	7	0	2	4	2	4	5	1	3	5	4	2	2	5	6	4	129
XLOC_017684	18	42061446	42062524	+	13	9	2	3	8	6	9	13	7	6	7	5	10	9	6	10	8	11	12	8	7	4	6	3	4	7	6	1	11	4	6	10	12	5	5	9	262
XLOC_017692	18	43071871	43072776	+	9	13	15	14	7	13	23	15	10	19	15	12	18	16	11	14	22	18	20	13	18	10	17	10	14	16	16	18	23	16	23	16	25	13	20	13	565
XLOC_017700	18	43573796	43574388	+	1	1	6	4	1	0	4	3	6	1	8	1	4	3	7	2	0	3	2	1	5	1	4	2	1	2	3	1	2	3	3	6	3	4	2	6	106
XLOC_017731	18	45106938	45109179	+	13	8	1	6	6	3	19	11	11	8	15	9	16	7	4	14	19	5	15	3	28	6	11	13	15	4	13	13	17	13	21	9	16	2	12	7	393
XLOC_017749	18	46003175	46004162	+	6	6	2	2	12	2	2	4	2	2	2	2	6	7	7	4	10	3	6	3	0	0	3	2	3	3	4	1	5	9	2	5	0	2	0	2	131
XLOC_017774	18	46582374	46583173	+	8	0	5	6	1	3	9	8	6	4	7	2	5	5	8	1	3	4	5	4	6	6	9	7	6	3	6	7	4	7	8	5	9	0	5	4	186
XLOC_017790	18	46880645	46881678	+	11	5	1	5	5	4	7	8	6	4	7	5	8	11	3	8	10	5	13	6	12	7	13	1	4	4	10	5	12	5	8	15	7	5	9	5	254
XLOC_017805	18	47269099	47270387	+	5	5	3	11	6	4	5	8	6	10	8	4	8	10	4	4	14	9	12	6	5	13	8	7	11	4	13	11	13	6	13	7	5	5	9	12	284
XLOC_017810	18	47454800	47460928	+	5	4	5	3	3	4	13	6	8	14	2	14	4	3	6	3	7	9	19	4	15	8	4	7	12	3	7	8	6	8	13	12	18	13	13	10	293
XLOC_017834	18	48331848	48332679	+	7	3	0	0	3	9	6	2	6	2	1	1	4	4	2	3	5	4	1	0	3	8	3	3	3	7	8	0	6	11	4	1	0	0	0	4	124
XLOC_017835	18	48333777	48334763	+	4	7	3	7	5	8	5	0	4	7	3	1	7	1	7	6	8	8	4	5	10	8	5	7	10	7	4	3	8	9	4	3	0	4	8	4	194
XLOC_017852	18	49122831	49170530	+	963	784	762	937	674	791	894	914	757	745	879	606	1115	904	713	1043	1034	910	919	758	944	796	959	763	887	700	907	1203	972	883	943	790	650	741	741	750	30731
XLOC_017897	18	50842292	50842846	+	0	2	1	8	5	3	2	3	7	4	3	0	4	6	2	7	7	2	2	1	7	2	4	0	3	3	0	1	2	2	4	5	3	0	3	5	113
XLOC_017905	18	51030000	51042906	+	46	27	54	29	50	20	119	181	25	41	39	12	42	57	89	15	71	37	151	111	29	36	31	25	57	24	142	11	55	41	141	209	22	7	26	25	2097
XLOC_017906	18	51033916	51035004	+	3	4	2	2	0	1	6	18	0	2	0	3	1	5	9	0	3	1	9	8	1	0	0	0	3	3	10	1	2	3	11	21	0	0	0	2	134
XLOC_017907	18	51035115	51036560	+	9	3	3	2	4	3	15	29	6	7	7	3	16	5	7	3	6	6	15	13	5	1	6	3	7	5	11	4	12	5	15	17	4	3	5	9	274
XLOC_017909	18	51048592	51049075	+	8	3	4	2	6	2	8	12	1	3	3	4	6	3	5	2	2	3	13	13	4	9	3	1	7	2	13	3	6	2	18	10	0	2	6	4	193
XLOC_017943	18	52164777	52165176	+	4	1	2	0	2	0	9	1	6	0	3	0	1	3	5	2	2	0	1	5	5	0	8	1	5	4	8	2	2	1	8	1	6	1	3	2	104
XLOC_017949	18	52294204	52295526	+	19	6	10	13	6	8	6	10	5	13	7	1	7	9	4	7	15	11	3	1	12	6	1	1	9	8	6	9	12	14	3	13	10	11	5	3	284
XLOC_017950	18	52295604	52298790	+	21	30	16	22	20	19	28	34	25	38	28	9	21	18	24	28	37	16	20	23	51	10	25	16	22	29	37	26	29	29	20	29	30	15	19	18	882
XLOC_017951	18	52299279	52300750	+	12	15	2	3	9	10	5	13	6	7	8	7	6	11	4	8	7	8	9	7	10	10	8	5	9	10	15	19	10	9	9	13	14	4	11	10	323
XLOC_017954	18	52422107	52423752	+	2	5	0	4	4	1	2	6	0	5	6	1	2	4	2	5	8	1	9	4	2	2	3	9	2	6	3	7	8	2	8	9	1	3	5	5	146
XLOC_017981	18	53158139	53160321	+	10	1	15	6	6	2	14	24	16	7	10	5	13	24	27	10	14	4	26	16	20	8	12	6	20	24	28	4	20	8	28	19	26	3	9	7	492
XLOC_017987	18	53238289	53239509	+	1	2	0	6	4	7	4	4	5	6	1	1	2	11	3	11	4	2	6	3	3	2	0	3	7	2	4	11	4	7	4	4	10	0	6	3	153
XLOC_018001	18	53667923	53668794	+	7	4	2	2	3	1	1	6	10	2	1	4	7	1	2	4	4	3	2	6	12	5	6	2	9	2	5	0	5	0	2	4	10	0	5	2	141
XLOC_018011	18	53931468	53931709	+	6	2	3	6	1	7	5	3	2	1	5	1	6	3	4	2	4	5	4	4	5	3	3	2	6	3	1	4	1	10	4	5	8	1	1	4	135
XLOC_018024	18	54301520	54302461	+	8	2	2	6	8	5	4	5	6	5	7	4	8	5	5	3	7	9	9	6	6	10	6	7	6	4	7	6	14	1	10	2	3	3	5	4	208
XLOC_018029	18	54391182	54392589	+	4	0	1	5	5	4	4	2	3	4	4	5	13	6	5	3	4	0	11	3	4	5	2	5	4	4	2	7	5	0	4	4	10	3	3	3	151
XLOC_018036	18	54589384	54590514	+	3	2	4	1	0	5	10	1	1	2	9	3	6	4	6	0	1	5	1	2	3	0	1	1	4	2	3	0	1	7	4	8	3	1	3	6	113
XLOC_018059	18	55498670	55501420	+	1	0	5	2	2	5	3	8	6	1	1	2	4	10	6	2	13	6	2	4	4	2	1	3	5	6	5	1	7	7	2	5	2	8	5	9	155
XLOC_018064	18	55582423	55584011	+	8	8	5	4	6	6	10	6	11	5	5	4	4	8	11	7	14	10	3	2	12	5	10	8	4	7	14	9	11	5	16	9	6	7	10	10	280
XLOC_018098	18	56381606	56382198	+	8	2	2	1	2	0	9	1	2	3	0	7	5	4	2	1	1	1	9	0	12	0	0	8	3	5	0	0	4	1	7	3	8	0	1	2	114
XLOC_018126	18	56806774	56807952	+	8	3	5	8	9	9	5	5	4	6	6	1	4	5	7	5	7	2	4	3	10	6	8	7	10	0	8	4	8	7	10	9	3	4	5	8	213
XLOC_018130	18	56812246	56817036	+	31	37	13	23	17	31	20	31	13	41	21	19	33	34	14	21	29	19	35	20	28	49	23	18	26	21	33	19	32	33	25	31	25	20	26	17	928
XLOC_018140	18	57324609	57338554	+	124	127	122	145	94	132	109	121	135	93	75	119	146	83	96	96	108	126	150	105	197	93	90	122	156	104	160	205	100	127	135	144	180	149	101	144	4513
XLOC_018167	18	58178018	58178407	+	2	2	2	9	1	3	4	4	3	3	5	1	2	5	3	1	6	6	3	2	6	1	2	5	6	2	2	2	7	3	5	6	1	1	4	2	122
XLOC_018173	18	58227037	58228237	+	3	4	5	3	1	3	3	4	1	1	0	4	1	3	3	1	4	7	5	3	5	2	1	2	5	6	12	5	11	9	3	4	4	3	7	3	141
XLOC_018198	18	58682697	58686608	+	21	13	5	9	20	13	16	14	11	8	12	12	23	14	15	5	17	15	13	30	23	13	14	22	19	15	24	17	21	16	22	18	14	3	10	22	559
XLOC_018205	18	58899538	58899856	+	2	4	4	9	0	3	4	8	3	5	0	1	7	4	2	6	2	3	4	16	7	2	0	5	6	2	9	5	2	2	5	5	8	2	0	6	153
XLOC_018207	18	59240313	59240522	+	7	4	3	4	4	5	6	4	2	2	2	2	3	0	1	3	4	4	7	3	4	1	1	3	2	3	5	8	1	8	2	5	1	0	4	1	119
XLOC_018209	18	59248330	59248625	+	4	4	1	1	6	3	4	5	1	5	5	1	5	4	5	2	6	2	0	2	6	3	0	2	0	3	1	2	7	7	4	3	3	1	6	2	116
XLOC_018210	18	59249016	59249225	+	5	5	1	3	2	7	7	3	3	3	5	1	3	4	2	5	5	4	2	5	4	5	5	4	4	6	5	4	5	6	4	8	5	0	5	6	151
XLOC_018211	18	59249578	59249798	+	1	6	4	1	4	2	1	2	1	0	6	3	3	5	2	5	10	3	4	1	5	7	3	2	2	2	5	3	1	4	4	4	1	2	1	2	112
XLOC_018216	18	59767963	59770878	+	27	35	15	46	19	16	29	35	10	29	55	22	22	44	28	54	37	14	45	24	21	22	31	10	21	27	27	22	22	20	25	38	27	9	23	31	982
XLOC_018234	18	60785892	60786791	+	3	0	5	4	9	4	5	2	4	4	6	3	8	6	4	1	21	9	11	0	8	6	6	2	1	9	4	4	5	8	2	1	4	1	3	3	176
XLOC_018235	18	60787052	60787674	+	2	1	2	3	10	4	1	2	8	1	6	0	0	3	3	0	25	9	2	0	4	4	4	3	2	1	4	0	8	7	2	1	1	1	7	4	135
XLOC_018243	18	61554205	61560211	+	1	3	0	3	15	4	6	1	29	5	1	1	3	1	0	6	12	6	8	0	31	12	2	3	5	2	0	1	32	5	5	1	29	0	4	1	238
XLOC_018261	18	62351616	62352712	+	3	5	2	3	2	5	1	4	5	1	8	1	3	0	2	4	1	5	4	7	6	6	4	2	5	0	15	5	3	1	2	8	4	2	3	4	136
XLOC_018277	18	62556400	62557264	+	0	8	3	6	7	8	2	6	2	2	8	4	2	2	2	1	6	6	6	6	4	5	1	2	6	3	11	4	3	1	5	7	1	3	1	3	147
XLOC_018279	18	62558058	62558561	+	8	3	7	6	4	5	4	2	6	4	4	1	3	3	5	2	3	1	2	1	7	3	0	1	6	5	6	4	1	3	2	3	2	4	7	2	130
XLOC_018295	18	62777848	62778700	+	7	5	2	8	2	4	2	5	1	2	6	1	6	0	1	2	5	8	3	4	0	2	1	0	4	2	2	3	5	3	12	5	1	1	8	2	125
XLOC_018303	18	62785260	62786228	+	14	8	0	7	4	3	2	2	2	2	11	3	8	6	2	5	2	6	7	2	8	2	16	1	11	7	3	6	2	5	5	0	4	2	2	6	176
XLOC_018316	18	63146729	63155359	+	8	1	10	2	14	0	6	18	12	11	0	8	4	11	14	3	16	1	17	9	22	22	4	9	10	8	20	2	15	1	11	15	14	18	5	7	348
XLOC_018332	18	63388927	63390792	+	13	16	20	8	9	13	9	14	19	18	18	7	18	6	7	7	10	14	20	16	14	14	10	6	24	6	18	12	15	12	19	17	13	7	5	8	462
XLOC_018359	18	63871179	63908591	+	202	196	211	203	188	218	133	182	172	197	194	131	209	155	178	149	212	133	166	175	280	207	180	160	237	201	326	225	221	180	228	278	218	117	230	181	7073
XLOC_018360	18	63908963	63913137	+	25	12	5	9	16	22	22	9	17	24	41	6	39	9	9	11	10	18	27	7	60	28	36	15	39	9	11	11	13	42	43	14	50	9	31	17	766
XLOC_018368	18	64590148	64591443	+	6	8	6	8	5	7	11	22	1	3	8	0	10	6	8	3	20	13	3	12	2	6	7	5	10	8	20	1	11	5	7	11	6	2	3	10	274
XLOC_018369	18	64591623	64592579	+	5	1	1	4	2	5	10	11	4	4	7	4	10	7	2	4	10	11	9	5	6	4	7	4	6	4	9	3	6	9	11	21	6	3	5	6	226
XLOC_018375	18	64645374	64646886	+	4	6	6	3	11	7	16	19	5	8	6	5	8	4	6	2	8	10	8	6	7	5	9	4	3	6	17	6	4	15	6	8	11	1	9	3	262
XLOC_018377	18	64648903	64653408	+	83	36	84	49	58	54	101	69	47	65	64	51	104	61	65	53	93	77	81	59	80	76	69	57	90	79	136	91	88	78	127	89	67	50	81	75	2687
XLOC_018380	18	64688833	64697240	+	108	97	124	98	145	94	285	147	91	76	78	81	104	91	122	81	209	150	221	133	183	92	74	87	100	102	170	89	204	126	180	210	135	60	82	90	4519
XLOC_018381	18	64690043	64690668	+	1	2	6	3	11	6	17	19	4	3	5	1	10	4	4	3	7	14	9	11	6	4	4	3	2	3	9	1	10	7	15	16	4	3	2	0	229
XLOC_018382	18	64698486	64702832	+	26	17	30	18	43	29	47	34	14	23	14	19	26	24	26	15	45	8	41	33	31	30	24	15	32	36	28	16	30	41	35	41	19	10	16	17	953
XLOC_018383	18	64702959	64705480	+	14	8	9	11	13	13	23	11	11	16	9	5	8	17	18	15	15	14	13	13	10	13	13	4	13	19	18	10	25	16	17	16	11	0	12	8	461
XLOC_018407	18	65327901	65328590	+	6	2	3	3	2	5	9	3	4	6	3	2	4	0	3	4	7	9	10	5	9	2	3	3	6	2	6	4	4	6	1	4	2	2	3	8	155
XLOC_018410	18	65331252	65332042	+	9	6	4	10	4	9	3	3	4	7	10	2	4	6	2	4	7	5	9	5	2	5	1	6	7	11	9	1	11	7	5	7	5	0	5	3	198
XLOC_018411	18	65332219	65333673	+	20	3	3	10	13	7	16	9	1	11	8	3	17	13	9	12	15	7	15	8	22	18	8	11	22	12	10	14	17	12	18	8	12	5	10	2	401
XLOC_018418	18	65527737	65529490	+	11	10	11	7	11	15	27	20	8	16	14	10	19	18	11	7	20	12	35	7	17	7	14	13	15	13	16	10	18	12	21	16	15	8	20	11	515
XLOC_018428	18	65692926	65693545	+	4	0	0	3	6	4	4	5	1	4	2	5	3	4	2	3	1	5	3	1	3	5	2	4	3	1	1	2	4	3	8	9	3	3	7	5	123
XLOC_018429	18	65693967	65694524	+	0	8	1	2	4	6	7	2	6	1	3	8	5	3	3	1	4	5	10	2	3	4	2	1	6	6	4	2	6	8	3	7	1	5	4	6	149
XLOC_018437	18	65782590	65783831	+	10	5	4	10	9	8	7	7	5	10	13	13	10	7	3	9	13	16	18	1	11	11	8	2	7	5	6	13	9	10	11	3	4	3	4	7	292
XLOC_018440	18	65837912	65838687	+	4	5	2	1	5	2	7	5	2	5	4	1	11	3	6	5	4	6	4	1	5	5	6	2	6	1	7	2	4	3	9	6	5	2	8	4	158
XLOC_018442	18	65840191	65840827	+	1	4	1	2	4	3	8	5	2	7	7	1	4	0	4	5	5	8	5	2	5	9	2	5	3	2	8	2	6	1	3	8	2	0	4	3	141
XLOC_018445	18	65844045	65845786	+	6	14	13	16	14	16	20	16	13	10	15	14	13	10	12	17	12	9	23	10	29	6	11	14	14	11	20	10	9	7	20	24	20	3	11	10	492
XLOC_018448	18	65887929	65896401	+	61	55	64	65	60	49	53	47	49	36	58	41	77	68	53	72	71	84	49	57	103	39	51	59	72	59	60	84	83	61	75	57	72	54	61	56	2215
XLOC_018452	18	65912817	65913656	+	3	5	6	3	3	5	2	2	4	2	1	1	1	2	3	1	2	4	2	6	13	4	4	4	2	6	7	5	7	7	3	4	5	6	2	7	144
XLOC_018458	18	65946728	65947388	+	3	1	2	0	1	0	3	0	0	3	0	0	2	2	5	5	7	1	3	7	9	5	9	2	1	3	2	0	4	1	7	4	4	1	6	6	109
XLOC_018461	18	65950217	65952346	+	11	20	21	23	12	12	19	15	12	16	19	13	19	6	22	8	8	12	22	17	21	11	17	13	16	12	29	9	7	14	27	14	11	3	23	13	547
XLOC_018462	18	65952894	65953609	+	5	1	0	4	6	4	1	5	3	5	5	1	3	2	2	2	2	2	6	1	6	2	6	2	5	3	6	2	1	5	4	5	7	3	2	4	123
XLOC_018465	18	65968511	65968848	+	4	7	4	8	8	9	8	5	5	7	9	2	2	8	5	3	7	3	3	7	10	7	7	6	5	7	9	3	8	3	5	6	6	3	6	3	208
XLOC_018467	18	65984998	65986111	+	7	3	2	2	7	3	6	6	5	5	9	2	3	7	5	4	4	8	10	3	13	6	6	2	2	2	11	3	3	6	9	11	4	0	5	4	188
XLOC_018472	18	1016733	1017532	-	5	3	5	4	2	0	0	5	4	2	5	5	3	1	8	0	2	2	1	1	5	5	5	2	7	1	2	13	2	1	1	2	7	0	5	4	120
XLOC_018482	18	1388034	1389026	-	3	3	2	3	1	4	6	1	7	4	4	1	5	5	3	5	4	5	8	6	5	3	4	4	6	3	4	4	8	1	10	3	6	1	6	4	152
XLOC_018530	18	2918962	2919663	-	2	4	1	1	10	5	4	6	5	2	4	9	6	4	3	0	9	5	5	3	9	6	3	5	10	5	3	6	7	5	10	7	3	5	2	2	176
XLOC_018537	18	2927646	2928681	-	4	2	2	3	2	5	6	6	5	5	5	6	6	4	4	6	13	8	6	6	4	4	6	2	6	7	3	4	8	6	6	5	10	4	4	13	196
XLOC_018570	18	9585483	9662125	-	57	27	14	24	24	13	18	60	15	13	44	13	34	2	4	28	23	19	48	43	9	18	25	27	41	3	3	19	19	0	25	21	5	9	12	12	771
XLOC_018580	18	10682679	10688255	-	31	35	24	17	43	27	56	56	40	37	50	18	52	48	40	33	66	24	53	37	71	46	37	35	42	35	55	15	78	37	60	64	56	7	41	45	1511
XLOC_018587	18	11048799	11055932	-	220	56	68	81	74	53	29	60	70	48	76	46	109	83	64	58	54	52	54	76	30	32	73	42	89	31	77	45	44	37	24	52	19	22	26	39	2113
XLOC_018592	18	11583280	11583665	-	6	6	0	7	0	3	3	1	3	2	3	1	4	5	5	4	0	4	3	6	5	1	3	2	1	2	3	5	3	4	1	4	4	0	1	3	108
XLOC_018593	18	11583767	11585082	-	10	6	1	14	6	7	1	9	3	4	8	11	5	6	1	13	6	7	8	8	8	7	4	2	5	4	7	11	5	8	11	8	3	7	6	2	232
XLOC_018612	18	13307446	13308463	-	6	5	3	1	9	4	9	7	2	2	12	7	10	3	4	5	6	3	14	16	2	4	1	1	14	5	1	2	3	3	3	7	4	3	1	3	185
XLOC_018613	18	13308546	13309357	-	5	3	5	4	9	2	8	10	3	4	6	4	2	2	3	6	4	2	6	14	2	0	4	2	11	2	3	2	5	0	7	5	1	0	0	0	146
XLOC_018615	18	13311216	13311873	-	6	4	3	3	11	2	6	9	5	3	3	3	8	2	8	5	3	2	7	10	3	5	7	1	7	3	5	8	10	6	2	10	1	2	0	2	175
XLOC_018630	18	13733591	13734669	-	5	7	3	2	1	3	7	3	6	9	11	3	3	0	12	4	10	8	8	5	10	7	9	9	3	3	5	7	12	10	5	7	5	3	18	11	234
XLOC_018641	18	14011054	14048371	-	14	9	14	16	20	12	16	18	9	16	19	4	11	11	17	14	28	10	23	10	10	11	13	13	4	6	21	18	17	9	11	16	11	3	17	7	478
XLOC_018684	18	15171897	15172972	-	6	4	10	7	7	6	7	3	3	4	6	2	6	4	5	7	15	12	7	11	8	5	2	6	9	5	16	7	8	9	3	4	6	1	0	5	226
XLOC_018691	18	15179984	15182108	-	9	19	18	6	18	9	15	15	2	8	3	5	13	8	16	6	20	9	24	11	7	6	7	13	11	18	18	12	13	15	10	17	10	14	12	13	430
XLOC_018719	18	21617173	21635298	-	37	21	33	29	18	9	24	21	25	26	35	16	31	24	18	24	21	9	23	11	33	22	27	13	15	29	31	32	26	18	32	32	21	26	33	19	864
XLOC_018732	18	23678524	23683259	-	24	68	35	62	21	16	12	42	32	22	28	27	18	63	36	72	21	25	6	50	39	29	23	32	16	60	32	110	24	23	20	40	38	25	10	21	1222
XLOC_018765	18	26383978	26384898	-	4	2	2	4	4	4	2	0	4	7	0	2	8	2	0	3	2	6	8	4	8	5	3	2	2	0	2	4	4	2	5	3	1	0	1	7	117
XLOC_018772	18	29079476	29080020	-	11	0	18	0	0	30	0	24	0	0	0	26	20	14	11	0	0	36	0	30	0	0	0	16	15	24	17	0	0	25	0	38	0	2	0	11	368
XLOC_018776	18	32382088	32382910	-	121	90	95	87	107	69	123	103	115	88	98	108	105	104	81	63	158	82	135	82	154	91	103	101	116	92	162	148	146	88	122	88	130	85	103	123	3866
XLOC_018810	18	35333346	35334011	-	7	8	1	5	8	9	5	3	6	3	8	1	4	8	11	16	8	3	7	12	6	2	6	3	6	1	7	12	5	8	10	4	7	6	7	6	229
XLOC_018827	18	35732078	35732897	-	3	1	1	1	0	5	1	4	0	0	2	4	2	5	6	1	7	1	13	3	8	3	2	0	2	3	8	2	8	4	4	4	4	3	6	1	122
XLOC_018833	18	36507806	36511656	-	27	10	12	17	15	27	16	23	9	17	29	16	26	22	20	19	12	21	29	18	28	12	9	24	26	14	28	14	25	27	24	29	13	11	16	17	702
XLOC_018852	18	39350308	39351164	-	1	1	2	2	2	2	5	1	1	0	1	5	4	3	3	3	4	4	1	0	9	0	0	3	2	1	1	5	2	1	2	4	8	2	3	6	94
XLOC_018869	18	43082814	43084041	-	14	15	11	11	8	13	19	10	9	8	12	7	19	10	17	7	11	10	11	9	30	16	12	9	17	28	17	8	14	11	12	16	14	6	7	13	461
XLOC_018870	18	43084106	43087689	-	61	32	20	59	33	33	52	35	39	40	34	23	47	40	38	34	37	38	47	40	62	21	38	38	37	40	32	37	48	34	52	46	42	35	38	44	1426
XLOC_018886	18	44800089	44800647	-	7	2	2	3	5	0	4	5	7	4	4	7	6	11	3	7	5	5	5	5	6	4	6	3	2	7	2	5	3	1	5	11	5	2	6	1	166
XLOC_018893	18	45648457	45649171	-	8	3	2	3	7	2	9	9	6	4	10	5	6	2	7	4	7	4	7	1	7	2	5	7	2	4	3	9	11	8	10	5	9	1	4	11	204
XLOC_018897	18	45658261	45658838	-	2	1	3	1	2	0	6	1	0	0	1	7	4	6	2	1	6	1	4	1	5	2	5	4	3	3	3	3	2	0	10	2	7	3	3	1	105
XLOC_018915	18	45906999	45907377	-	10	2	6	1	4	3	9	11	3	1	2	1	8	6	3	3	6	2	4	5	13	4	10	1	8	4	2	11	9	4	7	2	12	3	11	7	198
XLOC_018916	18	45924279	45925096	-	4	3	2	4	5	1	1	1	6	2	4	0	6	10	0	5	7	7	4	2	5	0	8	4	5	6	7	7	6	2	2	2	3	2	7	1	141
XLOC_018917	18	45925186	45926212	-	7	5	1	3	8	2	2	4	1	0	7	1	4	10	3	5	7	6	0	0	5	5	12	2	3	6	3	2	5	3	3	0	2	2	1	0	130
XLOC_018918	18	45926446	45927875	-	2	7	3	10	5	8	1	0	0	3	11	0	5	10	7	9	8	4	4	4	11	1	5	1	5	8	10	15	8	1	6	1	7	0	4	2	186
XLOC_018920	18	45928672	45936794	-	191	203	80	194	167	182	78	81	156	130	249	68	167	233	100	164	222	196	102	92	238	160	239	94	153	152	118	106	218	160	81	111	162	40	152	86	5325
XLOC_018932	18	46525289	46525896	-	1	3	0	2	4	4	4	3	1	1	5	3	1	3	5	3	5	6	7	3	3	6	1	3	1	2	2	2	5	2	7	9	6	0	4	2	119
XLOC_018934	18	46526588	46527424	-	0	3	1	0	9	1	9	1	2	2	5	4	1	4	1	2	6	8	5	5	10	1	1	7	2	0	2	0	9	6	8	6	3	3	9	3	139
XLOC_018936	18	46542332	46544399	-	28	29	12	15	24	20	14	13	16	18	22	13	14	18	16	10	22	14	19	20	28	12	20	14	20	28	20	8	28	19	29	27	26	8	20	20	684
XLOC_018939	18	46567412	46567799	-	7	8	16	9	10	11	17	4	10	13	8	10	5	10	9	8	6	8	4	4	12	8	7	16	14	12	11	17	12	10	14	4	10	13	13	10	360
XLOC_018940	18	46569420	46570557	-	7	5	12	9	3	6	15	7	6	5	10	2	3	6	10	7	4	8	10	7	14	9	5	10	10	12	8	5	6	5	12	4	6	2	7	16	273
XLOC_018955	18	47014177	47014964	-	2	5	3	3	6	5	5	2	0	2	2	1	3	8	5	3	5	6	7	2	0	5	2	1	11	3	6	1	7	3	7	3	3	0	3	2	132
XLOC_018957	18	47073938	47074585	-	5	3	1	2	0	2	1	4	0	6	3	2	9	5	3	0	2	3	5	0	3	2	5	3	6	1	6	1	8	1	5	7	4	4	1	3	116
XLOC_018978	18	47426204	47428546	-	14	8	13	12	13	6	15	11	13	10	11	4	17	10	9	11	16	17	31	16	23	22	14	12	14	10	12	14	19	19	30	16	9	8	11	21	511
XLOC_018999	18	48431986	48432651	-	4	2	3	2	5	1	4	3	6	1	1	2	1	4	6	5	10	4	7	5	8	1	3	1	3	3	7	0	8	0	5	4	4	0	2	2	127
XLOC_019000	18	48432877	48434235	-	4	6	2	2	3	4	14	5	3	2	3	1	8	5	3	10	12	3	14	14	15	3	0	6	4	4	9	1	14	0	8	10	8	3	1	10	214
XLOC_019080	18	50897667	50948202	-	50	15	13	15	84	32	50	28	76	37	30	18	46	53	42	21	120	45	68	21	72	81	32	25	54	28	27	19	160	42	48	33	53	8	51	27	1624
XLOC_019087	18	50937599	50938573	-	3	3	1	2	3	0	6	3	4	2	0	3	4	10	7	1	9	3	21	7	6	2	0	1	2	3	1	0	10	4	6	8	4	1	4	2	146
XLOC_019089	18	50942853	50943324	-	6	4	3	0	5	1	4	2	1	4	0	1	2	5	4	1	7	4	16	3	5	1	2	1	5	2	7	0	6	4	10	6	4	1	3	7	137
XLOC_019097	18	51201486	51229920	-	5	10	2	3	9	0	5	10	7	4	9	7	8	10	9	2	11	10	15	3	23	5	7	11	4	6	16	2	10	4	15	8	21	14	13	4	302
XLOC_019166	18	52859557	52893488	-	5	12	13	7	18	14	9	8	10	4	18	9	11	8	4	3	19	7	8	8	25	2	9	8	11	8	14	13	10	17	13	14	13	5	18	10	385
XLOC_019170	18	52910148	52926566	-	33	41	44	32	40	19	54	71	23	39	45	54	40	45	38	46	74	27	87	26	75	34	40	37	37	55	61	78	69	44	67	68	50	41	31	39	1704
XLOC_019191	18	53691421	53695143	-	79	53	54	59	63	56	67	58	86	75	66	43	66	90	47	62	109	51	82	61	87	44	52	52	51	64	84	64	95	59	85	55	67	52	57	66	2361
XLOC_019202	18	53866003	53866968	-	3	11	6	11	6	10	6	9	6	6	11	3	10	5	11	7	14	8	13	6	16	9	11	5	12	13	11	14	10	9	18	4	11	6	8	12	331
XLOC_019208	18	54116469	54117121	-	3	1	4	2	6	3	3	1	3	5	3	5	6	4	0	0	3	3	3	0	6	2	4	3	1	3	7	2	7	5	7	2	2	3	0	5	117
XLOC_019214	18	54122466	54123659	-	10	9	8	5	3	8	4	5	4	10	5	9	8	7	6	3	13	6	7	4	9	8	6	7	8	5	13	2	15	11	4	3	4	2	4	8	243
XLOC_019215	18	54123773	54124517	-	3	4	5	6	5	7	0	2	3	1	2	3	3	6	6	4	5	6	1	3	2	6	5	4	5	4	8	2	4	6	7	2	3	1	4	1	139
XLOC_019267	18	56071010	56080996	-	4	12	1	1	2	3	2	4	1	4	2	0	8	6	2	2	6	0	4	1	9	5	1	1	2	2	4	5	10	3	3	5	0	4	5	2	126
XLOC_019294	18	56660384	56680975	-	981	781	778	814	700	786	814	812	877	718	931	627	1029	798	793	709	1021	804	892	787	1319	758	936	687	937	788	1049	980	913	833	1149	958	983	692	933	774	31141
XLOC_019353	18	57989591	57990590	-	4	3	4	0	7	1	15	3	24	4	3	0	8	4	4	2	9	0	32	3	7	7	4	3	4	2	4	1	3	9	39	6	5	5	0	6	235
XLOC_019370	18	58636143	58652739	-	73	47	63	56	56	58	85	80	57	57	97	45	70	62	65	59	111	74	101	79	84	60	65	53	54	64	95	64	85	91	75	81	76	24	92	59	2517
XLOC_019373	18	58792228	58793798	-	22	12	13	16	11	7	5	19	3	8	0	1	10	7	10	9	6	5	1	20	12	6	1	12	14	9	17	24	5	4	7	30	5	3	0	10	344
XLOC_019383	18	59121464	59333099	-	389	360	278	348	337	268	385	329	411	364	374	224	341	383	358	337	496	371	411	347	657	443	379	283	328	352	454	303	526	356	546	395	504	138	358	289	13422
XLOC_019384	18	59144255	59145231	-	13	6	6	11	9	5	12	10	8	9	12	3	12	13	6	5	19	8	9	8	15	7	10	7	15	15	19	2	12	16	8	5	22	4	9	4	354
XLOC_019397	18	59359208	59359627	-	5	3	4	5	1	1	3	1	6	5	1	1	4	4	3	2	5	2	1	1	4	2	1	6	6	5	3	3	2	6	1	7	4	2	0	3	113
XLOC_019404	18	59595440	59616826	-	151	109	128	127	130	70	163	147	116	148	146	97	137	147	161	137	255	143	180	138	224	164	153	130	146	114	222	164	178	181	190	177	170	59	161	148	5411
XLOC_019416	18	59681987	59682797	-	6	2	5	1	2	4	2	3	2	1	3	0	4	4	3	0	5	7	2	3	2	10	1	3	6	3	10	3	3	7	1	5	4	0	2	4	123
XLOC_019417	18	59987084	59987631	-	4	6	4	5	2	5	8	1	1	6	5	11	6	5	5	7	6	5	11	5	9	3	1	4	6	2	4	3	13	0	9	7	8	2	4	3	186
XLOC_019427	18	60114076	60114866	-	5	6	1	3	3	1	5	0	1	1	4	2	0	2	2	0	7	1	8	1	3	0	5	3	3	3	4	2	2	2	8	2	7	1	1	7	106
XLOC_019430	18	60226284	60228754	-	35	25	14	16	29	22	32	17	20	27	21	16	34	28	26	33	37	28	40	21	34	30	27	23	24	23	23	23	43	24	32	28	23	15	14	22	929
XLOC_019451	18	60535186	60535388	-	1	0	5	3	0	3	1	2	1	6	6	1	5	1	1	1	2	2	2	5	0	3	2	6	1	0	3	4	2	1	4	1	3	4	2	8	92
XLOC_019454	18	60539353	60539666	-	4	2	5	0	3	1	2	0	1	5	2	4	6	0	7	0	3	3	1	0	4	2	5	2	3	1	7	3	1	2	7	2	1	2	1	5	97
XLOC_019455	18	60572637	60988020	-	345	258	195	279	404	385	442	244	324	368	418	205	339	202	296	249	566	417	385	250	394	456	443	276	333	179	444	225	440	433	462	332	274	105	434	332	12133
XLOC_019464	18	61192668	61195121	-	31	8	18	4	36	15	23	14	22	18	3	4	25	15	42	10	75	17	25	16	48	46	7	15	30	12	38	0	56	21	40	27	34	3	10	32	840
XLOC_019465	18	61195295	61196538	-	3	2	3	0	4	0	10	2	5	10	0	1	2	2	7	1	12	2	11	4	2	6	0	1	2	3	9	1	7	2	4	2	1	0	0	1	122
XLOC_019476	18	61435892	61436813	-	0	0	0	0	2	0	0	0	0	0	22	0	16	0	5	0	9	0	0	11	0	0	0	2	15	0	1	0	17	0	0	0	0	0	0	3	103
XLOC_019501	18	62383402	62384586	-	19	17	11	6	11	14	15	13	7	13	13	5	19	14	13	12	13	17	10	13	17	9	13	11	15	5	21	10	13	9	10	10	9	5	9	11	432
XLOC_019510	18	62533694	62534404	-	2	3	4	4	2	4	6	4	1	2	2	5	7	6	3	2	3	7	4	2	6	0	3	0	7	7	4	4	2	3	7	3	7	1	4	3	134
XLOC_019527	18	62986862	62990110	-	5	3	2	2	17	5	6	0	5	5	20	1	0	6	4	2	30	14	7	0	16	2	15	3	4	1	3	4	55	15	4	0	7	0	12	1	276
XLOC_019532	18	63106460	63107385	-	9	5	5	6	6	3	3	6	10	6	2	3	7	14	2	8	5	3	7	5	11	4	1	5	15	1	6	6	5	11	9	8	8	10	8	8	231
XLOC_019535	18	63119737	63125410	-	27	10	10	14	14	7	27	29	10	11	12	15	26	22	9	27	16	12	32	17	16	13	24	19	39	21	21	19	34	8	33	11	16	23	9	21	674
XLOC_019550	18	63698104	63699440	-	6	10	6	8	5	2	7	6	5	2	12	3	3	7	15	6	22	6	4	9	11	8	11	2	10	5	6	1	8	8	7	18	10	8	6	11	274
XLOC_019560	18	63938104	63941306	-	46	40	17	27	25	36	35	17	30	20	33	18	44	24	24	17	46	27	33	25	66	22	38	34	37	32	50	23	44	35	35	33	45	16	28	43	1165
XLOC_019566	18	64041452	64043287	-	13	14	2	11	7	9	14	2	5	21	18	4	11	5	5	5	18	16	27	1	10	18	17	16	10	3	8	7	14	6	10	5	10	6	14	13	375
XLOC_019584	18	64747495	64749387	-	13	3	3	7	9	11	6	18	7	14	10	4	12	2	2	4	13	15	28	13	7	12	16	8	7	7	17	1	16	7	17	17	8	2	12	4	352
XLOC_019616	18	65161677	65163090	-	54	25	36	38	38	28	66	44	42	47	54	39	52	44	57	38	76	49	70	36	53	58	32	50	52	31	76	41	89	65	74	50	39	47	51	43	1784
XLOC_019619	18	65352038	65352282	-	3	3	0	3	1	3	9	2	0	5	6	2	7	4	2	1	10	5	6	3	1	5	1	1	3	3	8	1	6	1	5	6	1	1	1	2	121
XLOC_019620	18	65352652	65352987	-	1	2	3	5	5	3	2	2	6	4	2	0	1	1	0	3	7	5	4	1	1	0	1	3	10	2	10	3	2	1	4	4	3	0	5	7	113
XLOC_019622	18	65379795	65380861	-	5	7	6	5	8	2	7	2	3	3	2	6	6	2	6	11	2	4	8	6	12	4	11	4	8	0	13	3	5	3	10	11	13	0	3	4	205
XLOC_019627	18	65629073	65629831	-	2	2	1	4	4	9	5	2	1	6	6	2	4	3	2	9	1	5	11	1	3	1	4	5	2	1	5	3	6	6	5	2	4	5	5	4	141
XLOC_019629	18	65641017	65642671	-	13	11	5	15	10	17	13	15	7	7	21	0	8	12	5	13	21	11	27	10	18	15	4	5	10	9	27	3	11	18	15	13	6	3	6	7	411
XLOC_019630	18	65699314	65718511	-	189	128	142	122	124	137	407	155	138	144	172	164	182	122	152	130	220	132	370	148	200	171	163	141	177	136	206	224	220	129	409	179	183	135	189	135	6475
XLOC_019632	18	65703835	65704784	-	4	3	0	0	2	0	0	6	2	5	1	2	2	2	4	1	2	3	0	2	2	2	5	1	2	6	4	1	4	2	0	2	5	7	7	7	98
XLOC_019640	18	65735295	65745766	-	86	43	27	48	53	60	117	75	41	49	77	21	54	52	42	50	69	96	145	76	115	53	48	48	62	47	78	42	87	124	109	95	64	13	74	53	2393
XLOC_019641	18	65758615	65760716	-	57	22	11	27	17	33	37	18	20	38	67	25	57	25	23	52	41	35	55	25	55	25	49	27	51	24	29	11	38	50	57	17	35	14	53	25	1245
XLOC_019643	18	65765538	65766811	-	18	8	5	4	6	14	10	6	5	7	8	2	13	10	12	8	10	8	7	4	12	10	6	4	17	2	10	3	9	4	14	10	5	6	7	4	288
XLOC_019680	19	6355436	6379560	+	63	46	76	37	47	75	77	33	69	46	50	49	66	78	45	40	48	47	63	33	61	31	37	38	47	91	90	55	68	82	71	83	92	42	54	48	2078
XLOC_019683	19	6470128	6470936	+	1	2	3	5	4	6	16	2	4	5	1	0	6	5	10	2	2	2	6	3	6	5	2	2	1	4	10	0	0	2	7	3	5	1	7	1	141
XLOC_019684	19	6471177	6471966	+	2	5	4	2	2	3	7	3	5	6	5	3	3	6	6	4	3	9	8	4	8	4	5	0	2	3	7	7	4	4	10	7	8	1	4	1	165
XLOC_019700	19	8732273	8733699	+	6	1	6	4	8	5	8	9	6	8	3	1	3	8	5	2	7	3	8	10	6	7	4	10	6	8	3	2	5	9	6	1	5	1	3	8	195
XLOC_019754	19	9507732	9507985	+	5	6	2	2	6	4	7	4	5	3	3	4	8	1	5	3	4	2	11	3	6	2	3	4	3	4	8	3	8	1	8	12	7	1	6	7	171
XLOC_019757	19	9539459	9540268	+	4	3	3	0	5	4	3	3	4	7	10	5	5	1	5	4	9	6	3	2	2	3	4	2	2	0	5	0	7	1	4	3	3	2	6	2	132
XLOC_019758	19	9612320	9616456	+	31	24	9	25	16	29	29	21	23	20	24	16	22	7	10	21	18	24	32	20	34	12	12	17	19	11	11	32	25	43	25	37	21	12	12	19	763
XLOC_019772	19	9880446	9884450	+	8	1	2	3	3	15	4	2	4	10	3	10	6	6	5	4	14	4	4	2	10	6	2	2	5	7	2	9	6	9	12	5	8	1	2	5	201
XLOC_019785	19	10405948	10406966	+	6	4	1	8	2	0	3	7	7	5	4	13	8	8	0	3	3	5	6	4	7	3	4	1	8	2	6	4	1	11	7	3	7	7	7	4	179
XLOC_019794	19	10893492	10894305	+	2	9	3	2	7	9	2	1	1	1	4	1	4	5	1	4	8	5	4	5	4	5	3	7	5	5	3	4	5	3	11	6	3	0	2	2	146
XLOC_019796	19	11038122	11049539	+	11	10	3	11	7	7	7	13	8	12	17	9	9	5	7	6	21	13	13	8	12	5	7	7	10	8	7	9	10	13	17	16	13	1	2	10	344
XLOC_019800	19	11168293	11169568	+	6	5	2	5	5	2	5	3	7	3	4	6	10	5	3	4	9	6	10	2	4	6	7	8	5	4	4	7	9	0	8	4	6	2	5	9	190
XLOC_019803	19	11286606	11287049	+	5	0	5	7	8	3	7	4	3	0	5	0	5	3	3	7	6	1	7	0	4	6	5	3	5	3	6	8	5	10	7	5	1	2	3	1	153
XLOC_019804	19	11288643	11383919	+	829	529	796	614	742	726	941	716	640	756	678	344	675	756	824	566	1259	728	997	624	744	761	623	585	703	605	1146	625	875	755	839	775	705	358	712	628	26179
XLOC_019810	19	11955950	11956827	+	7	8	2	2	4	2	8	5	5	6	8	3	9	1	3	4	2	1	12	1	7	3	3	2	7	0	3	1	4	3	5	2	6	2	3	3	147
XLOC_019811	19	11956960	11958045	+	3	9	3	3	0	4	9	2	6	0	3	3	9	3	5	7	7	5	13	2	15	8	5	1	10	6	5	1	5	4	13	7	10	4	2	4	196
XLOC_019816	19	13087893	13088413	+	6	4	4	8	2	7	3	3	5	1	2	2	1	3	6	6	8	3	4	4	5	2	7	5	3	0	7	0	4	6	1	5	7	1	2	3	140
XLOC_019861	19	15426441	15427631	+	13	5	8	17	11	11	1	0	6	6	2	10	6	8	8	10	8	9	7	1	6	3	4	12	1	9	6	3	3	6	3	3	5	2	3	6	222
XLOC_019862	19	15428229	15428652	+	4	5	1	0	5	2	2	1	4	2	1	1	3	4	7	3	1	2	4	3	3	1	0	3	5	3	4	6	3	2	2	6	3	1	1	4	102
XLOC_019863	19	15429008	15429874	+	6	4	5	6	7	7	3	3	9	12	3	1	6	9	2	7	8	7	8	5	4	9	4	10	2	5	7	1	3	7	2	4	7	1	1	4	189
XLOC_019864	19	15430523	15433287	+	29	17	12	14	16	17	8	6	31	9	10	18	16	18	22	14	17	22	15	12	32	16	1	24	23	15	27	12	11	13	7	16	13	0	9	14	556
XLOC_019865	19	15433710	15485113	+	175	121	104	122	133	103	40	39	177	100	47	137	155	123	97	117	124	149	106	55	178	117	37	152	173	93	111	86	99	110	83	49	136	43	48	148	3887
XLOC_019867	19	15435841	15436322	+	2	6	0	2	2	1	0	1	5	4	0	1	1	3	6	4	0	1	4	0	4	2	0	6	4	7	3	0	2	7	1	1	2	1	0	1	84
XLOC_019868	19	15436609	15437657	+	10	5	4	4	3	3	4	2	15	8	0	1	7	5	8	8	6	7	7	2	6	9	2	9	11	5	5	3	7	6	1	4	4	5	3	11	200
XLOC_019870	19	15438410	15440402	+	21	8	19	8	16	3	1	3	25	6	7	10	16	8	16	15	7	17	10	6	20	18	5	17	25	15	19	8	4	4	3	10	7	1	8	15	401
XLOC_019871	19	15486498	15487299	+	6	9	6	7	11	7	1	2	9	7	2	4	4	7	7	6	14	12	4	6	12	6	4	6	2	5	6	5	6	3	5	1	0	1	1	2	196
XLOC_019872	19	15487808	15490254	+	26	20	8	27	18	7	8	7	23	15	7	8	20	16	17	20	30	18	10	8	23	14	1	10	13	11	12	8	16	10	21	5	15	3	2	19	496
XLOC_019873	19	15491586	15495263	+	44	25	26	39	35	19	5	6	31	43	11	29	45	31	19	20	34	32	13	16	22	32	9	47	63	19	23	20	31	15	16	6	29	8	12	23	898
XLOC_019885	19	18234120	18234803	+	6	3	1	5	6	0	6	2	3	3	0	2	0	5	2	1	1	2	4	1	4	7	1	1	4	1	3	1	8	3	2	2	2	0	4	1	97
XLOC_019899	19	18613577	18614394	+	2	1	2	2	2	4	1	4	5	6	11	3	2	8	6	5	5	3	4	6	7	2	4	4	2	3	3	3	4	4	3	3	2	4	1	1	132
XLOC_019939	19	20826609	20827655	+	11	3	2	4	4	5	5	6	3	7	7	3	6	4	3	8	13	5	6	7	3	10	11	7	6	2	3	1	14	9	5	8	9	2	0	6	208
XLOC_019967	19	22680285	22693814	+	43	58	49	57	49	52	79	41	64	46	63	42	32	62	40	58	114	62	72	40	80	60	53	60	41	61	64	40	93	56	75	62	60	16	26	58	2028
XLOC_019973	19	22686205	22686904	+	3	2	3	3	4	0	6	1	0	5	1	1	1	3	4	1	4	5	1	2	6	10	3	7	3	2	4	2	9	2	7	1	2	3	5	0	116
XLOC_019977	19	22846234	22846824	+	1	6	1	5	5	4	11	0	3	4	2	6	1	2	1	5	6	8	7	3	3	3	0	2	2	4	2	2	0	5	9	0	2	4	3	3	125
XLOC_019980	19	23212845	23213532	+	6	1	1	6	4	1	4	5	3	6	5	4	2	1	5	6	4	5	11	3	4	0	4	2	3	4	5	4	2	2	4	9	2	1	4	4	137
XLOC_020009	19	25333309	25333917	+	4	2	4	1	2	0	6	6	2	0	2	3	6	0	7	4	1	1	2	1	4	0	5	1	3	3	4	3	3	6	6	6	1	1	8	3	111
XLOC_020016	19	25845878	25848285	+	82	84	91	68	59	64	83	84	69	92	83	69	81	80	67	78	82	81	94	59	117	67	77	57	62	68	110	79	87	92	96	81	86	83	74	78	2864
XLOC_020044	19	27255486	27266919	+	4	5	6	1	5	7	4	2	4	2	4	1	2	4	1	3	2	2	6	0	6	0	2	5	1	6	8	4	5	2	6	4	4	0	3	8	129
XLOC_020049	19	27260019	27260827	+	1	1	2	5	3	2	6	2	1	6	3	1	3	4	3	0	10	1	0	4	5	2	4	0	6	7	6	4	5	3	2	5	6	1	4	2	120
XLOC_020052	19	27262121	27263341	+	7	7	5	4	6	4	3	4	7	7	2	3	8	13	5	2	11	3	2	5	7	3	4	11	12	10	12	7	6	7	3	10	8	4	4	5	221
XLOC_020053	19	27264919	27265633	+	2	2	1	2	4	6	4	2	3	2	0	4	4	4	4	5	10	2	1	2	5	0	4	2	3	2	3	6	2	3	1	1	6	0	4	10	116
XLOC_020085	19	27718593	27719332	+	3	6	3	2	2	0	3	5	1	0	5	2	3	2	3	5	4	0	3	4	8	5	8	2	3	2	5	0	5	3	3	3	6	2	3	2	116
XLOC_020124	19	28525865	28526733	+	3	0	0	3	3	0	2	3	2	0	0	0	0	3	3	1	4	2	5	1	11	5	5	3	0	3	0	0	2	2	1	1	7	0	1	2	78
XLOC_020144	19	28678257	28679981	+	11	11	9	10	12	10	11	3	6	7	6	0	10	10	10	8	10	6	8	5	10	8	9	2	16	6	9	3	5	12	19	15	4	3	10	13	307
XLOC_020146	19	28682062	28684684	+	44	21	19	21	28	24	30	19	34	18	22	12	41	23	27	30	18	32	22	14	38	30	29	22	46	28	56	27	25	37	47	21	36	16	31	15	1003
XLOC_020149	19	29050455	29051535	+	6	0	4	4	5	1	5	6	2	11	9	2	4	4	5	2	8	5	3	4	3	3	2	1	6	5	6	3	10	3	8	0	5	3	2	2	152
XLOC_020151	19	29052854	29054071	+	6	1	2	5	5	2	10	4	5	4	4	3	4	5	2	12	8	3	7	4	13	3	4	5	7	4	9	3	7	8	5	0	8	1	2	5	180
XLOC_020155	19	29057878	29058778	+	4	2	1	7	1	2	6	2	3	5	7	2	8	3	2	5	5	1	9	1	3	4	3	2	3	0	3	4	11	4	1	3	2	0	4	0	123
XLOC_020164	19	30306492	30311777	+	32	45	41	36	39	55	58	28	42	49	35	29	49	57	40	18	60	39	53	31	42	46	26	29	38	29	60	38	46	38	62	36	45	26	41	37	1475
XLOC_020167	19	30936387	30936863	+	11	1	3	2	1	1	4	5	3	2	2	1	6	3	1	1	1	0	4	1	5	2	2	1	6	0	8	1	3	4	2	6	9	3	2	3	110
XLOC_020172	19	31365913	31366679	+	2	4	2	3	2	4	0	5	6	4	3	4	4	2	2	4	10	3	7	6	10	2	4	2	3	1	4	3	4	3	7	4	7	4	4	1	140
XLOC_020174	19	31597058	31599292	+	0	7	5	6	7	0	2	3	0	2	4	6	4	10	56	9	165	3	28	8	3	1	1	0	2	0	19	1	55	0	0	8	1	0	0	2	418
XLOC_020176	19	31600897	31602624	+	0	1	2	0	3	0	0	1	0	0	0	0	0	8	4	1	24	0	5	1	0	1	0	0	0	0	8	0	9	0	0	0	1	0	0	0	69
XLOC_020179	19	31840213	31966063	+	70	40	63	29	8	30	52	38	32	22	35	3	77	35	26	29	21	25	43	43	51	19	29	6	79	36	96	28	16	21	69	80	33	15	31	15	1345
XLOC_020192	19	33841265	33841856	+	1	0	1	1	0	2	0	2	5	0	2	0	2	4	4	2	5	1	7	0	1	12	0	3	2	2	14	0	2	3	2	7	4	0	1	1	93
XLOC_020210	19	34568136	34569157	+	5	2	4	1	5	3	3	6	8	6	4	1	5	7	2	7	7	5	7	5	10	10	5	1	5	6	7	1	9	6	1	6	4	0	5	3	172
XLOC_020222	19	34693869	34695258	+	6	9	9	6	3	6	6	6	5	11	8	2	4	11	6	5	4	7	5	6	10	10	2	2	11	4	9	4	6	2	4	15	18	2	5	7	236
XLOC_020223	19	34695493	34696135	+	6	4	1	3	2	5	3	4	3	3	4	7	4	3	4	3	4	5	9	1	5	7	2	4	6	9	4	0	5	6	5	4	6	2	4	4	151
XLOC_020232	19	34987589	34988590	+	1	4	3	1	5	0	0	3	4	9	2	3	1	2	3	2	5	3	1	8	6	8	3	4	1	1	2	1	7	3	13	4	6	3	0	1	123
XLOC_020265	19	35891734	35893200	+	10	10	7	6	11	5	8	5	3	8	10	7	7	8	6	8	4	5	3	5	8	11	4	9	9	5	11	13	12	9	12	6	7	1	1	11	265
XLOC_020277	19	36675546	36676635	+	16	14	14	17	13	19	20	13	11	16	12	3	9	9	13	14	15	7	14	11	14	8	14	7	15	11	22	10	12	13	13	12	12	2	19	14	458
XLOC_020280	19	36812059	36817127	+	8	3	0	1	0	3	6	5	4	2	17	5	6	7	0	7	2	4	7	8	6	2	7	0	4	6	2	7	1	7	5	8	5	6	7	5	173
XLOC_020306	19	37676397	37677344	+	20	8	10	5	10	10	9	12	6	6	26	3	19	7	8	6	9	9	6	12	19	5	16	2	13	10	11	8	7	7	15	15	20	5	30	5	389
XLOC_020336	19	38572912	38573299	+	7	11	6	8	5	9	11	9	12	9	10	4	15	7	11	5	14	6	13	6	23	7	7	5	12	12	17	7	15	9	9	19	20	0	7	8	355
XLOC_020360	19	40133691	40134676	+	1	5	2	5	2	2	4	4	1	0	4	2	7	8	1	4	2	2	4	2	2	1	1	2	7	3	4	7	2	5	3	4	5	1	1	2	112
XLOC_020364	19	40332398	40332739	+	8	7	6	9	5	5	11	10	6	9	8	5	13	8	11	6	10	13	13	4	9	10	11	7	10	3	3	3	11	5	14	11	5	2	4	4	279
XLOC_020368	19	40527734	40590961	+	784	663	656	690	709	624	848	686	634	701	698	324	633	671	690	542	987	640	751	685	917	740	721	549	689	559	961	530	791	662	828	732	665	312	694	576	24542
XLOC_020369	19	40584611	40584906	+	3	5	2	7	6	2	4	2	3	5	4	2	3	10	5	3	4	4	7	4	8	10	5	1	4	3	7	7	8	5	4	4	4	1	7	5	168
XLOC_020376	19	40748797	40749840	+	4	4	4	6	5	1	2	3	2	2	8	2	1	4	3	6	3	2	4	0	2	1	3	4	1	3	5	1	12	3	2	4	7	3	8	2	127
XLOC_020394	19	41664593	41665510	+	7	6	5	12	8	8	20	4	14	9	12	5	12	17	8	10	9	22	21	17	10	9	9	17	14	8	20	17	11	17	23	19	15	2	17	9	443
XLOC_020416	19	43295378	43295773	+	3	1	4	4	0	1	1	1	2	4	1	4	2	2	3	0	2	4	2	5	5	0	3	7	1	6	6	4	0	4	6	0	2	3	2	1	96
XLOC_020422	19	43489608	43490285	+	2	3	2	3	4	3	8	5	4	5	6	2	3	5	2	4	12	5	5	2	5	3	4	5	3	2	3	5	4	8	1	5	3	3	3	6	148
XLOC_020424	19	43495297	43496143	+	1	1	0	0	7	7	0	4	5	1	7	1	2	1	1	4	6	4	4	6	5	3	0	2	2	1	2	2	9	7	0	1	2	1	0	2	101
XLOC_020447	19	43939838	43941470	+	5	1	2	4	17	4	1	14	2	17	2	2	5	20	6	7	23	7	8	13	3	14	6	0	7	2	2	1	21	1	3	9	3	4	4	0	240
XLOC_020448	19	43941617	43945826	+	13	7	7	7	43	11	3	30	10	33	12	10	13	24	11	14	79	15	16	46	16	28	13	4	14	17	11	1	42	8	10	51	7	21	11	4	662
XLOC_020472	19	45063163	45066523	+	32	18	17	25	22	21	18	16	19	17	20	7	16	19	24	18	18	51	29	20	23	22	25	11	21	14	27	10	24	24	25	19	30	9	18	24	753
XLOC_020473	19	45066596	45069575	+	24	27	12	45	21	24	21	31	27	42	29	12	32	29	18	20	29	27	31	34	40	26	16	28	18	15	25	30	28	33	23	30	33	17	27	24	948
XLOC_020506	19	48417042	48420768	+	11	32	14	27	40	20	33	28	35	31	26	36	34	38	17	45	37	35	38	29	70	12	32	24	35	25	22	59	43	34	28	32	48	31	28	34	1163
XLOC_020522	19	49328839	49330816	+	6	7	5	4	2	9	7	4	7	10	11	11	5	9	3	21	16	10	8	6	9	9	6	2	8	6	3	8	6	14	5	7	7	5	3	4	263
XLOC_020523	19	49332350	49333320	+	3	3	2	2	4	1	1	3	8	6	5	3	2	2	2	8	7	5	7	0	2	0	3	3	2	8	3	4	7	10	5	6	12	10	3	4	156
XLOC_020525	19	49377513	49378375	+	8	7	1	11	7	8	8	4	6	5	4	0	6	11	8	6	9	13	6	4	4	1	2	4	12	10	12	0	6	9	7	7	4	0	2	6	218
XLOC_020526	19	49378607	49381948	+	40	21	10	27	22	41	34	21	31	12	11	7	31	41	15	32	25	27	26	25	44	12	10	6	17	45	33	20	23	23	22	42	36	6	15	5	858
XLOC_020541	19	50346135	50347770	+	4	2	2	0	4	6	9	3	5	5	6	6	5	8	10	2	8	2	14	4	6	1	9	7	5	4	10	1	8	11	9	4	9	7	5	10	211
XLOC_020544	19	50387867	50388692	+	10	6	4	4	5	6	9	8	5	6	7	5	8	4	3	4	3	6	12	3	5	9	4	3	6	3	9	6	13	4	6	12	2	2	5	2	209
XLOC_020552	19	50721209	50724352	+	61	44	60	55	42	31	89	48	66	52	47	45	44	44	49	40	50	52	81	72	86	54	53	50	54	54	70	65	79	40	65	58	85	43	42	57	2027
XLOC_020581	19	51499260	51518037	+	200	165	139	155	161	171	214	186	144	137	221	127	207	180	161	154	192	149	179	163	268	127	196	149	197	168	216	231	215	204	188	212	193	133	195	163	6460
XLOC_020596	19	51751687	51753669	+	16	22	12	13	13	17	12	13	17	12	22	14	16	26	20	16	28	15	26	11	24	11	14	12	13	17	36	13	21	18	19	24	14	16	9	14	616
XLOC_020607	19	51966322	51967192	+	5	6	4	9	4	1	10	7	5	10	9	10	10	7	2	12	9	5	8	9	10	2	6	7	9	2	10	11	8	5	11	9	8	1	3	7	251
XLOC_020639	19	54201636	54203311	+	7	4	8	7	16	10	13	5	9	3	11	5	10	7	8	8	6	7	8	7	11	14	9	7	8	10	8	13	11	5	6	11	8	1	5	12	298
XLOC_020648	19	54644495	54667525	+	210	168	111	135	191	170	221	161	211	183	258	134	275	287	171	189	428	157	280	174	347	216	259	213	170	190	198	186	526	160	260	179	307	176	240	231	7972
XLOC_020650	19	54785413	54786850	+	2	15	5	3	9	4	6	8	12	3	8	16	9	15	4	7	13	6	5	4	7	16	10	7	8	8	7	17	14	8	6	11	14	2	7	9	305
XLOC_020655	19	54815051	54816022	+	5	8	4	6	6	3	0	4	4	4	2	2	1	3	5	1	4	3	0	2	3	11	7	4	1	9	2	6	9	1	3	3	4	0	2	6	138
XLOC_020656	19	54816453	54817843	+	7	12	7	7	11	2	3	6	12	9	9	2	1	12	1	0	9	2	1	5	2	15	10	8	3	12	9	9	6	4	2	4	12	2	10	10	236
XLOC_020664	19	55419035	55428808	+	174	138	158	162	126	99	166	131	124	115	172	91	256	113	138	111	94	72	107	149	205	126	169	127	231	171	213	262	102	95	213	194	204	171	191	135	5505
XLOC_020668	19	55426501	55427942	+	8	7	7	3	10	2	10	9	8	7	6	3	13	4	9	4	9	5	6	7	12	6	15	7	17	3	18	3	6	2	13	11	7	2	9	10	278
XLOC_020671	19	55688397	55719991	+	245	264	274	216	238	221	367	297	272	241	251	278	376	307	216	281	298	211	408	210	438	290	270	252	278	190	467	266	395	268	330	337	424	281	308	278	10543
XLOC_020678	19	55906980	55907343	+	8	4	0	3	2	4	1	2	1	0	2	2	9	0	2	6	0	1	0	1	1	1	2	1	4	0	0	7	1	0	3	6	2	1	3	0	80
XLOC_020680	19	55910612	55912104	+	16	20	1	20	6	2	4	3	4	0	4	6	13	2	6	22	7	5	6	4	8	4	7	8	22	0	2	20	3	3	9	6	3	3	12	2	263
XLOC_020704	19	56550103	56550448	+	15	7	6	7	8	10	6	7	2	5	8	4	11	8	5	7	14	2	14	14	12	8	8	7	6	9	8	4	15	6	11	11	10	4	9	3	291
XLOC_020706	19	56658536	56659522	+	7	4	4	7	6	8	6	3	3	4	11	4	9	4	3	16	2	8	8	3	11	1	14	7	4	7	5	7	7	8	4	3	7	1	2	8	216
XLOC_020714	19	56906018	56907088	+	6	5	6	6	6	7	6	3	5	5	5	4	3	13	8	5	8	6	6	13	10	2	9	6	5	7	13	2	10	2	15	13	11	1	3	6	241
XLOC_020715	19	56907174	56908452	+	7	8	5	11	4	9	10	10	5	4	11	10	2	7	5	8	12	9	8	5	22	8	9	10	11	10	13	11	14	9	6	13	2	6	3	18	315
XLOC_020746	19	57665969	57666939	+	3	6	1	3	3	3	6	0	8	9	6	4	5	7	6	9	8	5	9	3	10	3	7	1	0	4	3	10	6	4	3	6	7	3	8	9	188
XLOC_020754	19	57693215	57694409	+	5	4	6	5	10	9	6	8	5	7	16	3	7	8	2	6	13	16	15	4	8	16	10	6	6	9	2	13	8	16	5	3	8	8	9	4	286
XLOC_020773	19	60794570	60799953	+	43	22	4	14	22	35	44	85	11	10	5	16	22	19	8	18	24	37	77	58	17	8	4	21	17	10	9	6	19	46	29	81	23	11	1	23	899
XLOC_020780	19	62159004	62160332	+	16	5	0	7	0	9	17	11	10	10	22	5	27	19	0	12	2	15	27	13	7	6	23	1	4	12	1	3	3	18	28	13	10	5	22	2	385
XLOC_020781	19	62160463	62161798	+	12	10	1	5	4	6	11	19	15	14	29	4	15	17	4	10	14	7	13	11	10	12	26	6	9	11	5	8	15	11	22	10	11	4	12	9	402
XLOC_020783	19	62250062	62251073	+	10	11	8	13	10	19	19	6	10	13	26	15	14	7	11	13	6	19	13	5	28	11	17	11	13	11	16	16	14	15	7	5	18	6	11	13	460
XLOC_020784	19	62251371	62252525	+	3	4	1	2	3	10	7	7	4	1	14	5	2	3	2	3	6	6	14	4	4	5	2	2	1	5	5	1	2	8	6	2	5	1	7	4	161
XLOC_020786	19	62266593	62268041	+	10	8	13	15	17	11	16	16	12	12	26	9	10	13	9	8	15	8	18	16	24	10	15	5	15	2	24	13	20	24	16	10	15	6	12	8	481
XLOC_020800	19	62583969	62584535	+	1	1	2	0	1	7	3	2	1	5	1	1	3	4	1	4	10	5	2	2	5	1	1	6	6	1	0	3	7	3	1	3	4	3	3	2	105
XLOC_020810	19	63908032	63919506	+	16	3	5	9	5	3	5	9	8	3	8	5	5	16	8	3	19	6	10	3	11	8	5	4	4	6	7	8	10	8	2	7	9	4	3	7	252
XLOC_020855	19	8308391	8308846	-	1	5	2	5	4	3	3	5	7	7	4	6	6	7	4	5	8	8	5	5	7	4	3	3	5	0	3	4	2	3	3	3	4	3	0	1	148
XLOC_020856	19	8309014	8320437	-	116	59	73	65	76	103	108	90	122	92	126	91	85	115	80	108	106	199	177	107	89	111	90	75	99	54	104	57	94	117	136	82	80	30	58	64	3438
XLOC_020857	19	8312698	8314930	-	23	13	11	19	13	32	22	17	26	24	21	15	13	26	17	30	19	47	32	30	27	20	17	19	24	15	12	6	16	32	22	22	14	3	9	10	718
XLOC_020860	19	8318814	8319589	-	5	7	3	2	11	3	3	3	6	6	11	2	10	5	11	8	4	21	8	10	6	5	3	4	7	4	2	0	3	9	10	3	5	0	2	4	206
XLOC_020865	19	8896135	8896682	-	2	1	6	5	7	1	1	3	1	4	6	3	2	3	3	3	5	1	2	2	8	4	3	0	2	2	3	6	7	2	2	3	6	3	5	3	120
XLOC_020866	19	8896936	8897339	-	2	2	5	1	5	1	6	1	2	2	4	1	0	3	8	2	0	0	0	1	3	4	2	1	4	0	1	0	0	6	2	4	5	1	7	0	86
XLOC_020870	19	9022948	9042110	-	3251	2713	2276	2952	2597	2942	3606	2861	2830	2904	3330	2185	3147	2900	2851	2441	3361	2981	3090	2680	3919	2963	3052	2756	3065	2556	3762	2366	3619	3504	3739	3214	3103	1442	2923	2958	106839
XLOC_020950	19	13198968	13201821	-	8	9	7	9	9	3	9	9	10	8	8	6	13	9	6	17	17	12	9	10	10	8	3	7	9	9	6	20	20	9	7	10	12	6	9	14	347
XLOC_020953	19	13743054	13744220	-	4	7	2	9	3	6	1	8	4	8	7	1	6	1	4	13	4	3	2	11	3	7	11	7	9	4	5	4	3	3	4	5	5	0	4	3	181
XLOC_020958	19	14119726	14120755	-	4	2	5	1	3	2	3	6	0	1	4	3	3	5	5	4	2	6	3	1	4	1	2	5	1	4	3	9	4	8	2	5	4	7	1	4	127
XLOC_020970	19	14660632	14662020	-	21	23	12	27	19	18	23	19	32	23	31	27	30	25	16	24	39	10	26	20	40	24	27	18	23	37	28	48	34	22	39	26	28	22	29	36	946
XLOC_020982	19	15087083	15090086	-	120	168	180	151	95	103	164	141	172	169	162	111	103	166	169	126	102	153	156	184	160	139	189	92	78	174	194	208	126	132	225	189	225	214	196	92	5528
XLOC_020984	19	15154342	15155234	-	3	11	7	19	13	11	17	5	6	11	11	14	11	7	14	10	16	11	26	10	20	14	13	5	14	7	22	16	14	8	15	14	10	16	18	10	449
XLOC_020991	19	15564126	15571340	-	5	2	3	9	4	2	12	3	0	2	3	3	11	2	6	0	5	7	7	0	1	1	0	1	6	2	7	3	2	7	11	4	0	0	2	1	134
XLOC_021009	19	16105925	16106644	-	3	1	1	3	5	1	3	4	3	3	0	1	3	6	3	1	1	7	5	5	8	1	3	3	2	8	1	3	3	5	4	4	9	1	3	2	119
XLOC_021010	19	16106742	16108081	-	6	12	4	9	6	8	2	4	2	5	3	0	10	2	3	5	15	8	3	4	11	6	2	6	9	12	8	4	10	5	5	14	9	0	3	6	221
XLOC_021011	19	16109526	16111749	-	14	15	8	20	14	13	10	12	12	6	8	4	15	18	6	7	12	17	13	8	25	16	12	11	19	13	17	7	11	18	13	20	10	5	2	16	447
XLOC_021014	19	16117939	16119714	-	5	12	2	12	6	11	5	5	10	6	5	1	10	7	7	1	7	5	5	3	12	11	2	9	7	4	13	4	10	9	5	6	15	0	11	8	251
XLOC_021047	19	18325391	18326038	-	2	0	3	4	2	0	8	2	4	1	0	0	4	3	1	1	4	1	10	2	2	6	1	7	1	3	1	0	1	3	2	2	3	1	1	1	87
XLOC_021059	19	18817830	18818744	-	16	4	8	4	9	7	11	15	3	8	6	1	10	3	6	7	6	6	4	9	6	11	9	4	12	4	17	7	7	17	5	4	6	0	4	2	258
XLOC_021080	19	20008729	20009488	-	2	1	1	1	1	2	10	3	3	3	6	3	3	1	2	3	6	2	7	3	2	3	5	1	1	4	11	3	6	3	6	8	2	6	5	6	135
XLOC_021125	19	21789449	21791679	-	16	8	12	5	12	14	10	12	14	20	10	5	19	13	11	18	21	6	14	7	14	13	6	11	11	13	19	12	17	6	11	6	14	2	11	20	433
XLOC_021127	19	21792747	21793589	-	3	5	4	2	3	5	2	2	2	3	2	0	6	4	4	2	6	8	6	0	6	12	3	3	3	2	9	2	6	3	6	4	3	3	2	4	140
XLOC_021129	19	21795428	21796971	-	8	3	6	7	3	5	7	6	2	8	4	3	4	7	12	6	11	12	1	3	5	8	2	10	7	9	11	4	18	6	8	7	2	2	2	7	226
XLOC_021130	19	21797147	21798518	-	12	14	10	10	9	7	14	10	12	5	14	9	12	15	5	8	16	17	12	9	14	13	6	15	13	14	18	8	9	12	17	10	10	8	7	14	408
XLOC_021131	19	21798708	21799169	-	6	6	2	7	7	2	4	8	4	1	7	8	2	2	10	3	9	6	6	4	9	6	4	2	8	5	10	4	6	6	4	5	8	0	1	3	185
XLOC_021164	19	23135760	23136528	-	3	4	5	6	0	6	0	3	1	0	2	0	3	7	0	2	8	2	3	0	5	5	3	3	5	4	7	1	2	3	2	3	1	2	2	1	104
XLOC_021175	19	23379943	23385661	-	207	193	176	215	158	199	180	118	142	146	141	102	251	137	159	121	180	101	97	124	319	161	168	163	249	211	263	241	174	135	204	186	284	146	199	229	6479
XLOC_021189	19	24197734	24198792	-	7	5	0	3	0	4	5	3	2	3	4	3	7	2	1	7	10	6	3	3	16	7	0	4	5	6	6	0	2	7	4	4	2	5	5	2	153
XLOC_021214	19	24930683	24931155	-	47	44	33	53	56	55	57	48	61	53	57	117	48	63	45	73	35	40	58	56	70	60	56	50	76	60	51	78	58	35	60	58	86	76	64	59	2096
XLOC_021223	19	25227781	25322842	-	725	583	581	627	584	505	744	547	596	671	591	358	658	620	562	585	907	542	697	517	787	599	567	548	651	571	886	783	723	537	786	740	630	435	593	504	22540
XLOC_021229	19	25519977	25523613	-	30	43	33	45	36	25	20	20	6	39	51	37	35	68	48	21	57	15	28	18	15	24	39	37	41	66	72	34	61	25	22	36	16	21	53	33	1270
XLOC_021231	19	25524185	25526159	-	10	9	11	12	8	6	5	5	1	12	13	6	3	18	8	4	17	4	9	5	0	0	7	9	12	12	12	3	12	7	0	10	6	3	6	9	274
XLOC_021237	19	25823471	25825443	-	14	10	19	20	4	8	12	14	11	10	18	16	17	24	9	7	17	14	17	14	19	12	14	16	12	15	21	21	18	17	22	15	9	17	8	13	524
XLOC_021239	19	25829701	25830370	-	4	5	1	3	2	2	8	9	3	0	1	1	3	1	3	5	7	2	4	5	10	5	6	5	4	2	4	4	4	1	6	2	2	1	1	4	130
XLOC_021240	19	25830494	25839470	-	3	11	5	3	2	4	8	6	8	11	6	3	5	9	8	2	6	9	8	5	15	0	5	10	1	3	7	1	7	3	2	4	7	2	4	5	198
XLOC_021260	19	27111495	27112121	-	8	6	1	2	3	0	9	6	0	2	11	0	5	6	0	4	2	3	2	5	2	0	3	4	5	2	2	3	2	6	3	5	4	0	5	5	126
XLOC_021261	19	27113119	27113874	-	2	3	3	4	2	1	6	6	6	3	7	1	4	2	3	10	4	1	3	2	3	3	3	3	3	1	3	1	5	4	8	5	6	1	4	5	131
XLOC_021270	19	27202806	27204303	-	11	10	9	14	12	7	14	10	10	7	4	11	21	11	12	15	14	10	13	7	17	23	15	12	19	8	10	9	20	6	17	14	16	6	9	15	438
XLOC_021282	19	27321952	27323627	-	24	7	9	5	7	15	10	10	11	11	11	12	19	8	5	8	13	16	14	6	20	6	15	8	15	3	16	12	8	17	20	21	13	5	11	13	424
XLOC_021284	19	27326603	27406992	-	8	3	3	2	4	9	5	7	1	5	5	3	6	8	4	4	3	8	4	2	3	4	5	4	3	2	8	2	7	4	5	4	6	3	2	6	162
XLOC_021289	19	27375431	27436258	-	74	54	45	46	51	42	73	71	47	44	84	37	53	50	62	43	81	70	89	64	123	52	97	52	58	68	93	56	60	64	78	81	83	32	58	66	2301
XLOC_021293	19	27404511	27405075	-	1	2	3	2	2	3	3	2	3	5	3	3	0	0	3	4	1	4	3	2	3	2	1	2	4	2	6	1	3	8	3	7	8	5	5	4	113
XLOC_021303	19	27425220	27426042	-	3	1	1	1	2	2	5	5	3	3	3	2	2	3	1	2	1	1	6	7	5	2	3	3	3	1	8	0	1	3	10	8	8	0	2	5	116
XLOC_021334	19	27900950	27902012	-	39	40	30	32	31	17	42	31	37	37	55	65	35	44	32	64	42	28	48	35	56	28	34	33	55	40	38	57	42	27	53	40	51	35	42	36	1451
XLOC_021336	19	27922542	27923728	-	14	9	5	11	5	9	14	12	6	12	19	5	18	11	9	7	17	6	15	15	16	8	7	3	15	8	4	6	16	12	18	20	9	9	9	6	385
XLOC_021340	19	27942233	27945310	-	42	33	21	23	32	33	42	39	37	32	26	14	36	32	36	23	40	26	37	25	56	33	42	32	43	28	38	20	40	24	49	24	38	12	10	20	1138
XLOC_021348	19	28163953	28164651	-	7	3	2	3	4	1	6	2	1	5	6	0	6	3	3	7	5	2	2	4	5	7	8	5	5	3	4	1	4	3	2	5	7	0	10	4	145
XLOC_021355	19	28174909	28176132	-	9	10	2	8	7	5	7	5	5	5	7	2	8	14	6	8	7	8	5	4	10	3	5	6	8	1	8	7	14	5	13	10	5	1	6	10	244
XLOC_021356	19	28176261	28178377	-	13	22	8	9	15	11	18	13	9	10	6	11	8	22	14	11	22	10	16	10	15	16	11	7	14	9	10	6	15	16	25	22	10	2	11	12	459
XLOC_021365	19	28280587	28283225	-	13	2	3	5	9	4	18	21	9	2	9	6	12	50	4	7	11	11	24	6	10	6	7	4	13	20	9	17	74	5	16	24	13	4	10	9	467
XLOC_021377	19	28462906	28463578	-	4	1	5	6	2	3	4	10	3	1	1	7	4	3	6	1	7	1	4	2	3	6	4	3	1	2	4	2	11	1	2	1	2	5	0	4	126
XLOC_021393	19	29267561	29269042	-	8	2	2	2	5	1	12	9	8	3	15	3	9	3	6	5	11	4	4	3	7	13	2	6	2	5	4	1	10	5	7	8	5	6	5	3	204
XLOC_021420	19	31604279	31663126	-	20	69	59	90	135	27	46	64	33	28	91	87	41	302	758	215	4021	44	277	165	47	51	31	76	78	49	468	29	966	30	38	147	31	17	14	47	8691
XLOC_021426	19	31638390	31640314	-	3	12	9	16	24	4	7	7	5	3	10	19	4	47	68	21	641	4	52	22	6	5	7	9	5	2	57	4	174	4	13	25	6	2	2	7	1306
XLOC_021427	19	31640546	31641078	-	1	3	1	1	1	0	1	0	2	0	3	3	1	7	20	3	94	3	9	4	1	0	0	0	0	1	6	3	31	1	0	5	1	0	1	0	207
XLOC_021449	19	33555774	33558537	-	5	4	8	7	13	8	7	4	14	41	6	25	12	6	7	5	3	6	7	9	7	50	9	52	9	7	15	11	8	9	7	6	12	38	8	64	509
XLOC_021452	19	33595761	33596742	-	11	5	3	5	9	0	5	8	13	5	4	5	9	2	11	9	4	7	5	4	12	3	5	5	8	5	3	4	3	0	3	5	0	1	5	3	189
XLOC_021454	19	33812863	33815214	-	331	200	266	207	194	200	461	244	206	199	233	165	341	172	220	163	252	134	278	234	290	186	228	223	345	175	322	252	251	128	398	274	263	144	225	196	8600
XLOC_021472	19	34873641	34876314	-	10	9	12	12	7	10	17	17	6	7	14	7	15	16	14	10	21	7	20	11	18	19	14	16	12	7	17	9	18	15	21	27	18	8	16	28	505
XLOC_021478	19	35041378	35042018	-	8	9	21	27	15	11	21	31	11	16	22	19	27	13	18	26	20	12	20	10	19	14	23	10	18	18	32	33	23	12	12	13	4	18	24	18	648
XLOC_021485	19	35232914	35234464	-	18	7	13	9	4	4	9	22	13	7	10	18	12	10	12	18	7	9	15	17	6	14	15	10	12	5	20	6	14	12	7	15	2	2	3	6	383
XLOC_021486	19	35251199	35320144	-	325	207	276	244	254	247	307	289	290	301	362	168	373	263	310	294	402	310	325	253	317	316	350	241	303	207	375	343	393	310	306	260	239	209	324	249	10542
XLOC_021490	19	35351905	35352555	-	6	3	2	1	1	4	2	5	3	2	0	4	1	3	3	2	6	4	0	0	10	1	3	1	5	2	3	2	2	2	6	2	6	1	6	2	106
XLOC_021491	19	35352617	35353655	-	4	4	2	5	6	3	7	9	6	8	8	1	12	4	3	6	9	14	7	9	17	9	4	6	7	5	4	9	11	9	11	9	9	3	4	5	249
XLOC_021503	19	35762908	35763752	-	1	2	1	2	5	3	3	1	2	6	4	2	5	3	2	4	10	5	4	4	10	3	5	3	7	12	13	11	7	5	5	7	7	3	3	10	180
XLOC_021518	19	36510179	36510784	-	4	11	7	2	7	3	3	2	3	9	10	3	3	6	1	11	0	7	3	5	6	4	4	5	3	1	4	5	8	8	3	4	0	2	5	3	165
XLOC_021580	19	39177263	39179454	-	13	12	3	14	14	15	10	9	11	10	17	7	8	20	12	11	19	18	8	6	12	6	22	8	9	3	8	13	14	12	8	10	9	8	22	7	408
XLOC_021610	19	40327654	40328460	-	6	0	2	3	4	3	4	3	1	5	4	2	7	1	6	3	6	4	7	7	11	2	2	3	4	1	7	0	5	4	3	5	3	1	7	3	139
XLOC_021632	19	41080875	41081544	-	6	5	0	3	3	5	7	6	5	6	4	7	3	5	1	5	5	4	2	2	4	2	3	3	7	8	3	5	1	5	8	4	4	2	5	8	156
XLOC_021714	19	43276699	43280060	-	48	28	28	22	38	29	31	39	29	37	69	54	37	22	28	28	33	15	38	37	43	39	66	47	49	33	35	27	37	26	37	50	30	37	57	53	1356
XLOC_021715	19	43280956	43282786	-	4	3	7	7	5	3	5	4	0	3	7	5	2	6	1	4	5	7	4	1	6	3	9	7	4	4	4	3	2	3	2	4	5	0	4	9	152
XLOC_021733	19	43862053	43862489	-	6	5	0	6	0	0	0	2	3	0	4	9	5	0	0	3	2	3	5	3	5	0	4	4	7	8	2	6	2	2	1	2	10	0	7	6	122
XLOC_021764	19	44628884	44629641	-	13	20	18	20	16	17	23	13	15	16	15	10	28	19	18	14	18	14	24	24	34	14	19	13	16	14	19	28	21	14	25	13	26	13	12	17	653
XLOC_021772	19	44812384	44813474	-	4	4	2	10	4	6	6	7	5	4	7	4	6	7	7	3	9	9	5	3	13	3	6	2	5	8	12	7	13	5	11	8	6	4	6	4	225
XLOC_021784	19	45373101	45375510	-	32	20	28	21	15	15	29	24	18	23	24	29	18	20	18	20	20	27	26	23	22	14	27	30	21	20	24	30	33	26	23	31	24	22	29	33	859
XLOC_021786	19	45442434	45444405	-	24	23	13	24	28	38	38	41	21	20	45	30	44	27	10	27	26	33	42	34	38	19	16	23	33	21	30	17	24	42	37	52	24	9	31	12	1016
XLOC_021787	19	45446131	45453092	-	173	140	114	114	192	268	291	235	144	148	321	125	189	170	133	167	219	258	303	196	212	99	153	144	210	164	204	106	249	326	222	294	204	63	159	171	6880
XLOC_021809	19	47554418	47556004	-	18	13	10	12	8	22	13	12	14	17	17	16	19	21	10	14	31	17	24	11	20	14	9	15	16	13	11	14	19	10	19	12	12	7	18	13	541
XLOC_021841	19	49374955	49376611	-	10	7	6	6	6	9	16	6	7	7	5	3	9	8	5	9	12	8	14	7	15	8	9	4	10	10	11	13	16	10	10	10	14	3	5	5	313
XLOC_021877	19	50103541	50103873	-	4	3	4	3	6	2	2	1	3	4	2	1	3	3	6	4	5	3	4	2	3	3	0	5	4	2	7	0	3	1	1	4	3	0	2	1	104
XLOC_021884	19	50139786	50140827	-	3	5	3	5	4	6	12	4	2	5	3	4	2	2	9	4	13	3	9	6	5	3	7	1	2	6	3	4	6	6	5	8	6	1	1	8	176
XLOC_021892	19	50645855	50646784	-	8	4	3	9	5	5	3	1	9	6	3	10	6	2	5	6	5	9	3	6	1	3	1	3	12	12	8	10	10	2	6	3	10	6	9	4	208
XLOC_021903	19	50868632	51144150	-	13	12	7	6	8	8	33	8	7	8	4	8	9	9	10	7	6	11	24	4	14	5	8	2	19	17	20	8	7	14	39	19	9	2	8	6	399
XLOC_021916	19	51065738	51072406	-	0	23	37	15	33	15	40	20	0	26	16	25	0	39	45	21	67	13	85	11	0	22	26	24	0	14	66	15	74	28	46	25	0	17	22	18	928
XLOC_021923	19	51095119	51096150	-	1	5	4	2	4	5	6	2	2	2	1	2	8	4	1	3	7	5	9	1	14	3	1	1	6	4	4	3	3	4	4	8	2	2	4	1	138
XLOC_021943	19	51632429	51633617	-	3	3	10	7	3	7	10	17	4	5	8	14	5	0	3	9	6	9	9	3	7	7	4	5	12	11	6	10	15	5	10	6	11	7	10	6	267
XLOC_021960	19	52284699	52285185	-	1	6	4	1	0	0	1	3	2	0	1	1	6	2	3	2	7	3	3	1	6	3	7	1	1	5	2	6	2	1	2	3	1	1	7	4	99
XLOC_021961	19	52285876	52286645	-	3	14	7	2	2	5	4	4	5	1	4	4	2	2	6	1	7	6	3	4	7	4	5	1	3	8	8	5	5	5	8	3	6	1	5	2	162
XLOC_021981	19	53245812	53270488	-	438	333	273	345	304	252	528	463	325	281	291	236	417	233	298	354	293	431	411	403	477	336	374	396	321	308	373	483	255	354	513	394	345	273	265	322	12698
XLOC_021983	19	53246578	53247387	-	7	1	2	9	8	2	3	3	3	0	7	2	7	4	5	1	2	6	3	1	3	4	4	1	7	3	6	0	1	5	3	2	4	0	2	4	125
XLOC_021994	19	54165253	54168256	-	82	20	26	18	0	40	24	17	8	21	27	28	95	19	5	14	2	17	27	8	23	2	6	17	96	17	26	18	2	38	35	39	26	13	21	21	898
XLOC_022001	19	54573065	54596312	-	23	24	21	21	28	16	30	24	20	16	23	14	27	21	27	19	28	15	34	19	50	20	17	18	29	25	33	17	21	21	42	28	32	12	23	19	857
XLOC_022004	19	54618697	54619380	-	3	3	4	1	3	3	0	0	3	4	6	1	2	3	2	2	2	6	2	2	4	3	5	7	0	1	9	3	3	2	6	2	1	2	5	5	110
XLOC_022006	19	54643467	54644828	-	11	6	0	7	3	5	5	2	5	2	10	3	3	4	3	4	12	7	8	3	14	1	4	4	9	6	8	10	22	2	9	3	6	3	13	7	224
XLOC_022023	19	54777406	54778459	-	0	5	0	0	13	1	0	0	1	0	0	0	3	0	1	2	5	0	0	1	1	0	0	3	0	14	4	6	0	0	0	0	0	2	0	0	62
XLOC_022029	19	54787504	54789625	-	15	16	10	12	20	9	7	11	10	17	15	12	10	15	3	7	12	7	10	13	15	18	9	4	19	20	11	11	13	8	12	5	9	3	5	9	402
XLOC_022031	19	54789956	54793807	-	32	31	21	31	34	22	30	20	51	26	32	32	30	28	34	26	34	16	23	22	62	54	40	23	25	56	38	44	41	19	23	17	56	21	21	39	1154
XLOC_022054	19	56358025	56359709	-	60	37	54	37	38	66	46	59	40	51	82	83	83	58	41	73	62	43	54	45	72	66	42	45	69	64	54	66	65	64	55	58	56	61	54	45	2048
XLOC_022090	19	58579390	58580834	-	25	9	4	15	5	6	3	1	3	6	7	9	25	2	3	12	15	6	9	4	8	2	9	5	27	6	2	17	13	13	4	7	10	4	6	3	305
XLOC_022091	19	58646824	58659608	-	507	357	453	352	359	435	585	425	428	411	423	277	504	440	453	322	587	353	523	410	605	490	459	349	491	398	615	398	517	359	622	539	447	254	434	358	15939
XLOC_022103	19	61699721	61701667	-	5	10	5	3	9	9	7	10	8	4	7	3	13	8	9	6	16	10	17	1	8	3	8	7	6	7	9	1	17	6	12	11	8	2	9	11	285
XLOC_022105	19	61702988	61703584	-	1	2	1	2	0	3	1	1	1	3	2	2	0	1	6	2	3	2	4	3	4	0	0	2	3	6	6	5	9	8	2	2	6	0	4	1	98
XLOC_022107	19	61953249	61957389	-	53	37	37	25	20	37	62	46	58	47	31	39	49	50	33	37	42	41	67	28	89	70	31	32	49	48	68	30	65	47	57	46	81	35	36	45	1668
XLOC_022108	19	62237559	62238133	-	2	0	1	6	3	2	2	1	1	1	7	0	8	4	3	7	1	1	2	2	6	2	0	1	3	5	4	1	3	4	6	1	1	0	4	1	96
XLOC_022111	19	62248665	62251071	-	23	15	17	14	15	22	13	10	9	17	30	18	17	10	8	22	12	24	22	9	27	15	12	7	18	9	22	13	26	27	20	15	8	9	16	13	584
XLOC_022113	19	62257461	62257979	-	4	2	9	3	8	3	9	2	9	3	8	7	2	7	6	3	12	7	16	5	4	3	5	9	4	10	6	4	4	9	9	4	0	3	3	4	206
XLOC_022139	19	64046339	64051352	-	3	3	1	2	1	2	1	9	3	9	0	1	6	7	2	1	2	5	4	2	11	4	1	1	23	8	10	1	2	3	5	0	10	6	0	2	151
XLOC_022176	2	4482165	4483778	+	19	21	19	21	24	26	17	23	17	12	31	15	26	23	11	26	23	19	8	29	29	14	38	21	16	22	16	20	30	30	30	20	23	6	26	22	773
XLOC_022201	2	4740040	4741852	+	15	4	6	8	9	14	10	13	4	12	18	3	8	2	3	10	14	7	12	11	7	15	12	6	16	2	11	2	8	11	7	9	9	0	7	10	315
XLOC_022229	2	6350308	6357708	+	4	5	0	3	5	1	4	2	5	1	5	12	6	5	2	4	9	3	3	4	6	0	4	12	2	2	0	9	9	3	7	2	11	1	1	7	159
XLOC_022256	2	13667735	13668265	+	20	13	14	16	12	10	11	15	14	12	11	18	26	19	12	17	12	15	27	21	7	25	12	10	20	18	27	27	23	17	17	14	19	16	20	22	609
XLOC_022261	2	14752287	14753283	+	5	8	5	2	4	6	5	8	5	1	2	1	1	6	1	2	6	3	5	5	11	4	1	7	3	7	9	1	2	3	1	8	4	1	2	5	150
XLOC_022295	2	19511415	19610957	+	4	4	8	4	8	6	6	1	7	5	3	4	10	8	12	3	7	6	17	2	7	9	4	5	7	10	11	7	10	6	17	8	6	4	4	5	245
XLOC_022306	2	19642595	19646198	+	23	8	8	25	11	8	27	18	27	31	23	13	18	31	29	16	21	30	29	22	27	36	16	28	34	21	36	10	23	19	20	27	25	5	28	32	805
XLOC_022309	2	19648502	19650466	+	13	12	11	10	7	8	6	9	19	7	13	10	8	23	16	12	21	13	7	11	14	12	11	12	8	5	11	4	6	11	17	13	14	5	16	7	402
XLOC_022346	2	22893812	22895737	+	14	21	15	11	15	17	15	5	18	13	17	11	17	23	6	14	20	11	13	14	17	10	18	14	10	15	12	17	13	20	16	9	15	8	18	12	514
XLOC_022388	2	30676680	30677378	+	3	2	0	2	3	6	9	3	2	3	9	8	2	4	2	5	5	4	2	4	10	3	9	2	3	6	7	2	7	5	5	10	4	0	9	2	162
XLOC_022397	2	32726655	32739855	+	6	2	2	6	5	8	12	2	7	5	4	4	4	11	5	6	9	4	8	1	11	5	5	10	2	17	2	12	2	16	3	2	9	1	5	9	222
XLOC_022402	2	32855047	32856137	+	3	5	2	9	4	7	9	4	3	5	6	2	3	2	5	4	5	7	3	1	12	6	5	4	3	5	1	7	4	10	1	1	4	3	8	7	170
XLOC_022421	2	36683437	36685729	+	16	14	8	16	21	16	32	24	21	17	11	11	13	14	14	11	22	18	28	14	24	15	20	10	24	19	26	12	21	13	20	19	22	15	20	37	658
XLOC_022433	2	38487426	38488632	+	9	3	0	3	3	4	9	8	1	4	4	2	10	3	1	6	6	14	5	4	4	7	3	6	1	4	1	3	2	4	14	10	5	5	8	4	180
XLOC_022473	2	44515905	44517228	+	8	5	1	5	5	4	5	3	1	5	7	2	6	8	7	4	8	4	4	4	12	12	6	3	2	4	3	3	7	5	2	2	9	1	2	8	177
XLOC_022478	2	45158795	45159417	+	1	7	6	7	6	10	7	15	0	0	12	6	0	12	8	12	7	9	8	5	0	0	15	6	0	3	7	13	10	9	9	13	0	0	12	2	237
XLOC_022479	2	45426415	45822011	+	160	163	168	145	136	151	331	155	148	159	191	171	213	355	213	70	331	134	379	81	249	126	172	168	165	170	386	148	556	225	280	224	250	114	211	201	7499
XLOC_022496	2	46694922	46696136	+	4	6	8	12	9	3	6	3	8	11	8	5	3	8	4	8	13	4	7	8	11	5	3	5	3	5	6	4	7	5	8	12	7	7	6	10	242
XLOC_022501	2	48379077	48381877	+	64	55	40	52	36	33	48	56	48	54	43	43	53	51	44	29	63	52	65	35	46	39	47	47	47	44	75	66	47	40	48	47	54	19	44	45	1719
XLOC_022505	2	48477041	48478131	+	7	11	4	5	13	8	19	12	8	7	7	6	16	7	12	11	12	9	17	9	17	2	15	9	13	7	19	7	11	11	19	16	10	9	13	4	382
XLOC_022570	2	66270603	66273227	+	3	1	3	1	2	1	1	109	4	5	1	3	5	3	2	5	4	6	0	2	2	3	1	2	3	1	1	5	8	3	1	1	236	2	3	2	435
XLOC_022600	2	71902278	71903357	+	0	1	1	1	2	1	3	2	2	5	2	0	2	2	1	3	5	3	1	8	2	5	3	6	3	11	6	1	1	2	3	5	3	1	4	6	107
XLOC_022601	2	71903503	71904475	+	0	4	1	2	8	1	1	8	2	3	3	0	3	7	1	2	4	3	2	7	2	4	6	1	5	5	2	3	3	3	3	3	12	2	3	3	122
XLOC_022602	2	71907161	71908685	+	5	7	1	8	8	5	4	7	7	4	8	4	6	7	0	12	12	0	7	7	8	2	6	6	1	11	7	4	11	3	9	8	4	1	10	7	217
XLOC_022606	2	71911480	71912511	+	0	1	0	1	6	2	2	7	2	4	3	0	6	3	3	3	8	1	3	3	6	7	4	3	5	9	4	2	7	0	5	2	2	2	3	3	122
XLOC_022681	2	88912937	88913343	+	1	6	4	1	7	4	1	1	9	3	2	1	3	1	3	1	3	0	5	4	0	2	3	0	4	2	1	3	7	2	2	4	2	2	2	4	100
XLOC_022701	2	90986223	90986909	+	15	14	11	12	11	21	24	23	10	8	20	6	14	21	15	10	40	17	28	11	15	7	11	12	13	10	26	12	41	23	20	12	10	10	10	8	571
XLOC_022754	2	94855438	94898341	+	52	48	38	43	38	44	59	51	55	31	77	49	60	73	41	74	72	52	75	34	82	44	60	45	58	62	44	54	73	58	58	58	68	24	58	43	1955
XLOC_022756	2	94867019	94867648	+	3	3	1	5	4	2	3	3	3	1	1	1	5	0	2	1	7	4	7	2	9	2	7	5	6	9	8	6	5	5	5	7	3	1	5	1	142
XLOC_022800	2	99035387	99035609	+	2	7	0	2	13	1	2	1	5	3	6	4	5	4	0	5	11	5	3	2	13	4	6	2	3	5	0	3	12	7	4	5	6	6	9	3	169
XLOC_022807	2	101705792	101707324	+	22	20	20	23	13	19	19	23	16	15	18	18	22	30	26	21	26	25	18	17	28	9	22	17	24	17	45	22	17	44	21	31	32	18	37	30	825
XLOC_022810	2	101709036	101711549	+	11	5	4	11	9	8	6	12	7	10	11	5	7	8	11	12	13	8	11	14	14	6	11	5	10	14	17	13	12	17	18	10	13	1	12	15	371
XLOC_022826	2	101941240	101942838	+	19	6	5	12	11	21	16	19	15	12	22	7	5	7	15	9	12	26	12	3	13	6	10	6	18	8	10	6	20	27	26	9	18	9	16	16	472
XLOC_022845	2	105209152	105209752	+	0	7	0	6	1	2	5	7	2	2	4	0	4	2	2	5	4	5	8	4	9	5	3	3	2	0	7	2	5	2	1	5	4	1	1	2	122
XLOC_022904	2	115653751	115684879	+	1835	245	165	221	750	246	1210	507	305	627	746	261	699	708	340	303	593	442	1107	284	179	867	802	474	267	464	213	179	526	134	483	228	117	263	1169	465	18424
XLOC_022915	2	115796162	115796915	+	9	2	10	1	0	1	6	2	1	1	1	0	3	1	1	4	8	4	2	2	2	1	0	0	2	0	2	5	2	2	7	0	2	2	2	4	92
XLOC_022929	2	116529294	116530362	+	5	4	5	8	4	4	7	5	5	3	5	2	4	6	6	4	11	1	12	6	4	9	3	5	7	4	12	1	3	10	6	7	3	2	4	5	192
XLOC_022931	2	116535393	116538799	+	26	17	13	14	20	20	20	7	11	13	20	5	19	10	10	10	18	12	10	21	33	19	15	16	19	8	19	13	11	11	25	14	14	4	22	17	556
XLOC_022950	2	119124070	119129271	+	31	16	24	29	23	15	27	24	26	24	15	12	17	22	31	15	46	29	25	23	25	20	30	11	17	19	30	21	21	13	15	36	13	3	27	13	788
XLOC_022952	2	119162182	119162969	+	5	3	2	0	2	4	5	3	5	4	9	3	6	5	6	3	14	3	1	2	3	4	2	4	1	3	8	1	11	3	4	4	3	2	3	1	142
XLOC_022965	2	119649459	119650257	+	4	3	1	1	2	3	3	8	9	1	7	4	2	3	1	8	9	6	6	10	1	6	6	0	4	9	6	2	5	8	9	5	2	0	1	3	158
XLOC_022968	2	119652677	119654574	+	2	10	8	13	8	21	12	20	10	6	17	11	16	39	7	19	18	19	26	28	16	3	12	5	8	18	6	12	15	12	14	23	8	1	6	10	479
XLOC_023010	2	121127777	121128948	+	6	5	5	5	3	5	7	4	4	3	7	0	10	5	9	6	2	6	5	2	9	13	4	1	8	11	7	5	10	9	14	6	6	2	10	4	218
XLOC_023011	2	121129451	121129998	+	2	2	3	3	1	5	5	1	4	6	1	0	2	7	4	5	6	3	3	6	5	1	3	6	7	11	6	5	4	5	7	8	5	0	3	0	145
XLOC_023020	2	121512125	121515333	+	16	16	14	15	13	25	19	24	27	14	20	9	38	18	22	17	22	21	26	16	33	21	41	14	41	16	34	20	33	20	40	31	26	8	22	19	811
XLOC_023028	2	121962157	121963269	+	0	0	3	1	0	2	0	2	13	4	3	9	0	0	4	0	2	3	0	0	13	6	6	15	1	0	6	0	2	3	4	2	12	4	5	9	134
XLOC_023038	2	122289308	122291096	+	2	1	4	2	4	0	12	6	3	5	2	1	5	0	0	1	3	2	8	3	6	2	4	4	5	1	8	1	4	10	9	4	1	0	5	3	131
XLOC_023094	2	125990616	125992871	+	12	10	3	16	3	2	1	10	12	0	15	1	8	12	5	13	10	0	2	11	20	2	7	0	7	14	8	14	9	1	2	24	17	0	20	2	293
XLOC_023126	2	127722666	127723189	+	4	3	3	5	2	1	3	3	7	6	3	2	2	1	4	3	2	5	9	1	4	0	2	7	2	1	6	4	2	2	2	3	5	0	4	1	114
XLOC_023127	2	127723505	127724515	+	4	5	3	2	3	3	7	6	4	5	2	2	5	8	2	4	5	4	13	4	12	6	3	8	3	5	4	3	11	6	8	6	14	3	5	3	191
XLOC_023180	2	130376629	130377735	+	13	0	2	3	4	4	8	5	2	3	7	0	13	5	1	2	11	1	4	9	14	0	11	4	3	3	11	2	6	3	9	4	1	1	3	2	174
XLOC_023181	2	130378038	130381193	+	24	30	10	11	14	12	38	16	18	20	18	8	25	20	18	24	24	9	30	10	41	15	32	16	29	22	24	11	34	19	21	20	24	4	20	9	720
XLOC_023233	2	134793758	134806952	+	251	210	157	187	224	352	189	240	186	181	342	146	218	174	135	213	214	259	247	167	239	157	184	142	234	137	222	158	188	361	200	241	181	96	190	168	7390
XLOC_023243	2	135784199	135784411	+	10	5	5	4	8	10	9	6	4	9	8	6	8	6	8	4	4	3	12	8	7	5	7	5	5	1	8	6	5	2	12	13	2	4	9	1	229
XLOC_023252	2	136338529	136447728	+	739	591	676	639	602	703	925	638	649	635	638	411	873	652	665	503	974	655	881	647	928	659	667	589	790	567	1068	653	799	774	888	871	767	453	754	663	25586
XLOC_023265	2	136687353	136689954	+	8	18	7	16	11	11	17	11	23	19	11	9	10	10	12	11	11	13	25	17	23	20	16	14	12	17	19	16	24	13	44	22	25	20	17	26	598
XLOC_023269	2	136992978	136993802	+	4	2	0	4	1	0	2	1	0	6	3	3	3	4	2	5	2	0	0	1	7	2	6	6	2	0	0	2	3	1	1	3	7	6	7	5	101
XLOC_023270	2	137029694	137030323	+	1	5	1	2	0	0	10	0	0	2	0	0	1	3	1	0	2	0	9	0	12	0	0	0	0	2	0	0	5	1	7	0	10	1	0	2	77
XLOC_023279	2	1263607	1281225	-	26	17	24	30	30	17	22	27	16	17	21	18	16	25	17	15	15	29	30	13	21	17	22	13	17	16	22	22	18	22	27	27	24	12	15	24	744
XLOC_023323	2	8068101	8068458	-	7	3	4	5	3	2	4	3	4	10	5	3	1	1	3	2	8	4	5	5	6	2	8	4	9	4	7	5	6	3	3	5	1	0	2	7	154
XLOC_023355	2	15623358	15624336	-	1	5	5	0	1	4	9	5	1	0	5	2	0	5	1	1	3	6	4	5	2	5	2	3	0	2	4	4	3	1	7	2	7	2	2	3	112
XLOC_023360	2	15660818	15661700	-	6	5	2	2	4	6	5	7	3	5	3	0	3	1	4	2	5	4	9	5	5	4	4	1	4	6	5	8	1	12	6	5	2	8	3	8	163
XLOC_023377	2	18376534	18377713	-	6	9	4	12	3	2	3	5	3	6	7	7	9	6	14	5	10	3	1	4	8	7	3	3	9	5	7	10	9	9	11	4	5	2	7	8	226
XLOC_023390	2	18735573	18736081	-	4	2	3	4	3	2	6	1	4	7	1	1	4	3	2	5	7	7	10	0	7	5	3	6	2	1	3	2	11	2	1	1	4	0	2	1	127
XLOC_023404	2	18753371	18755067	-	10	9	5	7	10	10	11	11	10	17	15	6	20	21	6	10	20	11	15	11	16	3	11	12	8	9	9	5	18	11	12	20	16	3	5	14	407
XLOC_023407	2	19332496	19333463	-	4	4	3	3	7	4	6	5	4	5	8	4	8	0	8	7	8	3	8	2	14	0	8	3	3	3	3	5	16	4	6	6	10	0	4	3	189
XLOC_023412	2	20769606	20773489	-	130	93	55	113	99	124	132	164	114	84	127	42	62	83	87	117	168	58	154	75	205	57	96	57	50	90	91	73	161	87	119	149	141	80	127	62	3726
XLOC_023464	2	25556023	25556763	-	3	1	2	9	2	2	8	2	5	4	6	0	4	5	0	3	1	0	3	4	7	5	5	4	1	5	2	5	7	4	4	1	3	3	5	3	128
XLOC_023487	2	26647980	26649397	-	8	4	5	6	10	5	10	8	1	11	6	3	4	8	10	11	12	8	13	9	9	2	6	8	6	7	6	20	14	8	11	9	10	1	5	2	276
XLOC_023491	2	26653280	26656632	-	24	26	21	28	39	22	36	23	27	38	31	7	33	16	28	22	63	24	30	21	31	44	17	19	27	10	37	25	36	24	29	14	21	15	24	22	954
XLOC_023492	2	26656878	26657496	-	3	1	4	5	6	3	3	2	3	3	4	0	3	2	6	8	7	1	3	4	4	3	4	1	2	2	3	4	1	5	3	3	3	2	5	0	116
XLOC_023529	2	31504355	31505301	-	3	2	1	1	12	7	1	5	2	1	13	0	6	1	3	2	4	0	7	2	4	0	4	1	6	5	1	0	4	0	3	4	2	1	0	0	108
XLOC_023530	2	31506009	31507158	-	7	1	0	6	10	3	3	3	4	3	10	1	9	9	1	1	3	0	11	4	6	2	3	4	12	4	5	3	6	11	5	10	9	1	5	0	175
XLOC_023557	2	36815195	36818948	-	75	83	50	54	39	102	116	107	73	88	82	79	67	78	65	69	94	94	112	81	123	51	39	61	86	86	112	99	77	159	114	156	129	36	61	73	3070
XLOC_023565	2	38788072	38789624	-	17	19	5	14	14	15	8	7	8	6	16	1	8	10	3	6	24	11	4	8	5	8	15	4	13	8	3	15	15	9	14	11	3	9	15	10	361
XLOC_023567	2	38791204	38791693	-	3	7	1	6	2	4	3	1	1	4	5	0	5	2	3	6	15	4	3	4	6	1	2	0	3	3	1	2	6	2	2	1	2	0	3	3	116
XLOC_023568	2	38791933	38792480	-	6	4	2	8	6	4	4	0	2	2	10	1	1	2	2	0	3	3	2	2	2	2	4	1	1	9	3	4	3	4	5	2	0	0	4	2	110
XLOC_023569	2	38792549	38793388	-	7	6	3	6	4	3	4	2	2	6	2	1	8	1	2	5	19	3	5	4	1	4	4	0	5	3	3	8	9	3	5	5	0	0	3	2	148
XLOC_023571	2	38838313	38838674	-	5	6	1	4	7	4	10	0	4	6	5	0	6	5	0	3	13	10	8	1	1	1	7	5	4	2	2	1	3	6	2	5	6	2	8	0	153
XLOC_023583	2	43648924	43979866	-	1238	580	821	642	866	663	1136	777	821	615	830	485	1110	534	734	402	1126	680	1119	685	1107	651	681	628	1319	659	1178	718	695	636	1216	1026	912	367	797	695	29149
XLOC_023648	2	62443135	62444245	-	0	4	7	5	3	6	2	3	5	4	4	1	1	6	5	5	7	2	6	8	3	5	6	3	9	2	16	13	2	5	4	3	2	2	3	6	168
XLOC_023659	2	64163340	64185418	-	2	1	2	1	6	1	3	1	13	1	2	7	3	5	9	1	14	3	1	1	16	9	2	15	3	4	0	4	6	2	5	7	15	6	3	9	183
XLOC_023670	2	65661134	65661474	-	6	2	5	5	5	4	2	3	1	3	5	6	3	8	2	3	6	5	3	4	5	2	4	1	1	4	1	1	6	8	3	6	3	6	3	2	137
XLOC_023672	2	65662937	65665445	-	13	20	7	13	18	29	17	13	15	18	24	9	18	18	17	20	18	16	7	27	18	10	11	8	15	18	11	5	16	20	6	22	18	6	12	13	546
XLOC_023673	2	65666228	65667682	-	8	6	10	6	9	8	5	18	10	7	4	8	9	10	7	11	13	7	8	13	9	7	4	6	12	9	10	5	12	12	10	13	5	3	7	4	305
XLOC_023678	2	65670517	65671102	-	1	3	0	1	4	3	2	2	1	1	0	3	1	0	1	5	3	7	2	1	3	4	0	1	3	6	3	6	6	4	0	4	0	1	1	2	85
XLOC_023691	2	65766327	65865508	-	34	37	27	39	37	25	55	44	48	42	38	51	41	60	32	51	77	35	64	25	67	50	41	22	39	39	35	40	63	45	42	51	84	32	41	47	1600
XLOC_023716	2	73374310	73376519	-	17	0	0	1	1	2	7	11	0	0	9	0	11	8	0	8	1	1	10	3	1	1	5	0	4	3	5	3	54	1	14	5	2	0	4	1	193
XLOC_023720	2	73824321	73825487	-	0	4	5	11	4	1	10	8	4	3	5	1	3	2	6	4	6	3	12	9	12	3	2	7	3	4	12	6	3	4	9	8	4	6	6	5	195
XLOC_023754	2	86495885	86496943	-	2	13	2	6	1	9	1	3	2	3	2	6	5	6	1	9	3	1	2	1	5	2	3	5	4	5	1	5	2	3	3	1	4	2	3	2	128
XLOC_023777	2	89882048	89885649	-	31	24	13	18	24	24	34	21	22	26	29	22	33	29	15	27	44	41	38	25	53	23	21	28	45	30	30	17	47	34	38	43	38	12	44	23	1066
XLOC_023797	2	92058992	92059698	-	7	0	1	1	6	5	2	2	3	2	2	0	5	2	9	3	3	1	3	1	2	2	1	0	2	0	5	2	1	5	1	4	1	0	1	0	85
XLOC_023807	2	92720348	92723667	-	8	7	14	9	14	18	8	9	11	3	15	19	15	8	9	10	8	12	12	19	11	9	5	14	7	12	9	10	12	14	17	11	14	6	6	10	395
XLOC_023829	2	96270646	96271281	-	5	3	0	4	2	5	2	5	3	2	8	0	2	1	1	5	5	3	2	6	6	9	5	0	3	1	1	1	1	3	5	2	1	0	2	0	104
XLOC_023853	2	98381707	98382481	-	4	2	2	5	7	4	2	2	5	2	4	1	3	2	8	3	5	1	11	3	4	8	3	3	3	2	5	3	3	7	9	9	2	1	1	6	145
XLOC_023859	2	98406604	98407562	-	3	2	1	7	1	1	4	1	6	1	1	1	4	6	2	1	1	2	4	2	4	2	2	12	6	10	5	3	7	3	6	8	6	2	3	2	132
XLOC_023966	2	100964450	100965734	-	3	4	3	0	2	1	1	2	1	0	0	2	6	3	2	4	10	0	4	2	2	0	0	5	2	17	8	4	3	0	1	3	2	1	1	8	107
XLOC_023993	2	101499035	101499587	-	2	5	1	3	3	1	4	0	5	5	4	1	7	4	1	1	1	2	4	5	3	2	5	1	1	4	7	1	3	3	3	8	2	0	0	1	103
XLOC_023996	2	101501771	101502070	-	7	0	0	0	3	1	0	0	1	1	1	0	0	1	5	1	1	0	2	2	1	1	0	1	6	2	2	5	1	0	4	1	3	0	0	0	53
XLOC_024037	2	107557905	107559952	-	14	9	4	11	4	7	27	5	8	6	6	2	7	13	3	8	10	6	21	3	19	7	5	5	10	15	7	9	21	9	19	14	20	6	6	7	353
XLOC_024047	2	107735626	107736746	-	6	0	3	5	3	1	7	6	3	3	2	1	4	7	2	4	8	2	8	5	6	2	3	4	5	8	7	4	8	6	6	3	4	3	2	2	153
XLOC_024100	2	115721011	115722114	-	2	13	1	8	2	2	2	7	2	7	8	0	4	1	2	0	1	2	5	0	4	2	3	5	4	2	4	11	3	7	9	0	4	1	1	3	132
XLOC_024149	2	120151742	120152466	-	3	0	4	4	2	5	1	0	1	0	4	4	3	1	2	6	2	6	10	2	6	6	2	2	3	3	5	6	3	2	3	3	2	1	2	3	112
XLOC_024152	2	120244919	120247869	-	18	30	24	21	26	27	40	29	26	27	18	20	25	50	19	33	37	15	34	23	37	20	29	27	19	25	29	36	42	25	63	34	42	21	23	12	1026
XLOC_024164	2	121512139	121529589	-	135	185	92	140	152	130	209	136	106	151	122	115	149	159	112	158	470	182	294	131	254	126	143	144	162	127	165	199	225	238	231	283	181	63	139	166	6174
XLOC_024165	2	121523918	121524805	-	8	10	5	9	10	4	11	2	2	3	5	5	11	7	3	11	14	7	15	10	14	3	3	6	3	4	4	3	8	13	17	12	8	2	2	12	266
XLOC_024175	2	121967182	121968748	-	0	0	3	0	0	4	0	0	18	4	7	3	0	0	14	0	3	3	0	2	22	10	4	11	0	0	9	0	2	2	3	2	19	2	14	8	169
XLOC_024177	2	121970161	121971332	-	0	0	0	0	0	1	0	0	15	3	0	1	0	0	12	0	1	5	0	2	10	3	3	8	1	0	7	0	1	2	4	0	5	2	5	11	102
XLOC_024194	2	122223720	122233137	-	91	100	63	67	88	75	108	90	84	105	93	67	99	99	84	71	130	74	105	54	162	100	99	92	98	102	130	75	153	80	159	93	104	44	97	98	3433
XLOC_024195	2	122228792	122230019	-	4	6	5	4	9	9	19	5	10	9	6	4	14	8	8	8	22	5	14	4	18	16	10	13	10	15	16	10	11	10	14	10	11	4	6	4	351
XLOC_024196	2	122230601	122231557	-	9	4	9	9	10	10	10	5	4	8	3	1	5	9	8	8	11	2	7	7	9	4	4	3	7	11	13	2	10	3	6	12	13	1	7	5	249
XLOC_024210	2	125289518	125290205	-	6	3	3	6	6	4	2	7	2	3	3	2	4	2	5	2	7	1	6	9	6	9	3	5	6	5	7	1	5	2	2	2	4	1	3	7	151
XLOC_024212	2	125324305	125324898	-	4	7	2	8	6	2	6	3	1	4	5	4	10	2	2	6	6	2	6	2	7	4	8	3	7	3	1	2	3	3	6	9	1	1	5	3	154
XLOC_024213	2	125340199	125375959	-	440	323	305	354	328	319	546	356	320	371	425	275	519	324	390	296	531	311	487	355	692	377	383	315	450	339	492	316	445	424	707	524	476	156	524	412	14607
XLOC_024221	2	125587463	125587778	-	3	3	1	3	8	4	9	1	1	5	3	3	2	4	2	3	4	4	7	2	3	2	2	4	4	1	0	5	6	5	7	1	4	1	2	2	121
XLOC_024227	2	126056517	126070741	-	24	19	23	22	43	24	39	31	44	25	31	40	41	33	41	21	85	26	47	26	41	40	31	34	25	28	52	25	46	33	45	41	51	32	40	25	1274
XLOC_024231	2	126131021	126132163	-	1	8	4	9	7	5	5	0	2	3	5	2	4	7	2	1	3	3	4	2	9	0	6	1	3	4	4	2	10	2	5	1	9	0	2	1	136
XLOC_024235	2	126371205	126373437	-	29	19	26	28	24	20	24	32	14	22	38	11	22	21	30	23	33	14	30	15	37	33	31	29	28	25	44	30	31	22	25	31	28	23	31	26	949
XLOC_024249	2	126810691	126816690	-	11	11	15	4	11	10	19	10	10	8	18	11	38	17	12	12	12	9	26	6	17	16	15	12	15	18	29	11	14	11	20	11	21	13	16	11	520
XLOC_024252	2	126935995	126937690	-	8	4	8	4	10	4	9	4	6	7	11	14	12	7	5	6	13	3	11	10	6	8	5	2	13	5	9	8	7	6	9	7	10	6	8	12	277
XLOC_024285	2	128705015	128708345	-	506	445	597	427	475	549	923	460	583	499	525	618	612	510	531	421	717	493	823	438	231	452	509	481	645	518	590	551	736	487	758	478	635	492	643	621	19979
XLOC_024289	2	128979582	128980810	-	4	10	4	10	7	4	7	15	5	2	8	4	8	6	3	8	10	2	7	14	10	7	10	6	5	7	5	7	15	13	8	16	5	4	14	13	283
XLOC_024297	2	129731019	129735546	-	24	33	18	41	19	23	30	11	27	28	19	7	29	8	28	22	26	19	21	11	24	26	25	36	19	7	20	31	26	40	19	25	15	8	29	19	813
XLOC_024300	2	129753003	129765049	-	129	81	113	111	129	108	193	116	105	69	140	36	98	85	170	65	146	93	159	132	115	124	138	118	119	78	189	73	119	106	137	166	86	14	89	101	4050
XLOC_024335	2	131366680	131367713	-	8	3	4	3	12	7	4	3	4	3	7	3	9	3	2	3	6	2	8	5	9	1	2	2	4	13	7	5	5	4	3	4	8	1	1	6	174
XLOC_024338	2	131371820	131373083	-	8	2	3	2	8	2	3	2	3	1	1	3	9	6	7	9	8	1	2	3	2	2	0	5	7	13	5	4	3	2	5	3	6	0	2	6	148
XLOC_024343	2	131377862	131378578	-	4	4	1	1	10	1	5	0	0	2	0	1	8	5	1	1	7	1	9	0	1	0	2	2	2	6	5	6	1	2	0	4	7	2	0	8	109
XLOC_024346	2	131384131	131385749	-	5	5	6	5	12	2	6	2	7	2	3	6	10	3	6	4	13	3	9	4	4	5	1	9	6	23	10	5	5	4	6	3	3	3	1	8	209
XLOC_024347	2	131386457	131387502	-	11	3	2	2	6	3	6	3	2	0	0	0	4	3	3	1	8	2	5	4	1	2	1	4	4	16	5	3	5	2	2	2	3	1	0	3	122
XLOC_024349	2	131388311	131389404	-	6	6	6	2	17	4	2	3	1	1	2	1	8	2	3	0	9	1	2	2	1	1	3	6	5	17	8	4	1	5	5	4	1	3	0	2	144
XLOC_024351	2	131391272	131392750	-	6	4	9	0	18	0	4	2	2	3	0	0	3	3	3	4	6	5	6	3	0	5	2	6	3	15	0	6	2	4	0	2	9	1	2	8	146
XLOC_024354	2	131393984	131394888	-	0	3	4	0	8	0	1	4	0	2	0	3	3	1	2	2	4	1	1	0	0	0	0	2	3	9	5	13	3	1	1	2	0	1	0	2	81
XLOC_024368	2	132599199	132599534	-	10	3	4	4	3	6	2	5	4	2	2	2	3	8	1	4	7	1	2	5	7	5	4	1	3	2	3	7	7	4	5	5	3	5	2	7	148
XLOC_024370	2	132600692	132600991	-	1	1	6	7	4	5	3	6	3	0	4	1	3	2	1	2	4	4	0	5	4	4	2	1	3	1	4	1	2	7	1	5	3	1	0	3	104
XLOC_024393	2	133627632	133628565	-	5	5	3	5	3	7	3	6	6	5	7	2	5	8	4	6	5	2	10	3	11	1	2	3	6	2	12	2	9	3	9	12	11	8	3	0	194
XLOC_024394	2	133628723	133629586	-	3	2	5	1	6	1	5	6	4	2	5	1	2	5	3	4	4	4	6	3	9	3	4	4	6	3	7	3	4	7	6	6	5	2	1	8	150
XLOC_024396	2	133634727	133635685	-	12	4	2	3	5	8	6	8	8	5	6	8	13	8	3	9	11	7	10	3	15	9	4	7	8	7	10	3	11	3	9	5	15	10	8	8	271
XLOC_024398	2	133636679	133637916	-	3	3	1	4	4	4	0	2	4	5	4	3	8	10	3	3	9	2	2	3	11	10	7	4	7	7	13	1	13	5	3	3	8	7	5	9	190
XLOC_024411	2	134038158	134038746	-	7	6	3	8	1	2	3	2	5	4	5	3	11	6	3	3	2	5	9	2	11	2	4	1	2	4	2	8	3	2	6	4	6	0	8	5	158
XLOC_024417	2	134747161	134747832	-	4	1	0	2	2	4	3	2	4	1	3	0	4	3	1	5	3	2	2	6	3	2	6	4	1	1	2	0	3	4	4	7	4	0	2	5	100
XLOC_024438	2	134829905	134832425	-	62	40	22	39	35	28	23	33	33	23	24	23	33	29	28	17	32	39	28	28	41	22	39	30	26	16	26	23	17	16	38	37	31	20	13	24	1038
XLOC_024460	2	136160760	136161436	-	2	2	3	2	3	1	3	1	1	1	8	1	1	5	4	3	3	2	2	6	8	1	0	6	5	4	0	4	5	4	5	1	4	4	4	3	112
[truncated: 2,632 more rows]

## Sheet: Novel lncRNA gtf file
Additional File 1b: Identified novel lncRNAs, gtf file
Chromosome	Software	Exon	Start	End		Strand		LncRNA gene, transcript, exon, etc. information
1	Cufflinks	exon	1412526	1413383	.	+	.	gene_id "XLOC_000015"; transcript_id "TCONS_00000026"; exon_number "1"; oId "CUFF.61.1"; class_code "u"; tss_id "TSS21";
1	Cufflinks	exon	1432437	1432619	.	+	.	gene_id "XLOC_000015"; transcript_id "TCONS_00000026"; exon_number "2"; oId "CUFF.61.1"; class_code "u"; tss_id "TSS21";
1	Cufflinks	exon	1412526	1414297	.	+	.	gene_id "XLOC_000015"; transcript_id "TCONS_00000027"; exon_number "1"; oId "CUFF.61.2"; class_code "u"; tss_id "TSS21";
1	Cufflinks	exon	1461541	1464284	.	+	.	gene_id "XLOC_000015"; transcript_id "TCONS_00000027"; exon_number "2"; oId "CUFF.61.2"; class_code "u"; tss_id "TSS21";
1	Cufflinks	exon	1413076	1413383	.	+	.	gene_id "XLOC_000015"; transcript_id "TCONS_00000028"; exon_number "1"; oId "CUFF.61.3"; class_code "u"; tss_id "TSS22";
1	Cufflinks	exon	1461541	1464284	.	+	.	gene_id "XLOC_000015"; transcript_id "TCONS_00000028"; exon_number "2"; oId "CUFF.61.3"; class_code "u"; tss_id "TSS22";
1	Cufflinks	exon	1496341	1498998	.	+	.	gene_id "XLOC_000028"; transcript_id "TCONS_00000041"; exon_number "1"; oId "CUFF.25.1"; class_code "u"; tss_id "TSS35";
1	Cufflinks	exon	6607080	6607467	.	+	.	gene_id "XLOC_000068"; transcript_id "TCONS_00000132"; exon_number "1"; oId "CUFF.128.1"; class_code "u"; tss_id "TSS90";
1	Cufflinks	exon	17993153	17993680	.	+	.	gene_id "XLOC_000096"; transcript_id "TCONS_00000171"; exon_number "1"; oId "CUFF.169.1"; class_code "u"; tss_id "TSS123";
1	Cufflinks	exon	21712557	21713448	.	+	.	gene_id "XLOC_000108"; transcript_id "TCONS_00000195"; exon_number "1"; oId "CUFF.204.1"; class_code "u"; tss_id "TSS140";
1	Cufflinks	exon	21713759	21714639	.	+	.	gene_id "XLOC_000109"; transcript_id "TCONS_00000196"; exon_number "1"; oId "CUFF.205.1"; class_code "u"; tss_id "TSS141";
1	Cufflinks	exon	21724289	21725044	.	+	.	gene_id "XLOC_000115"; transcript_id "TCONS_00000202"; exon_number "1"; oId "CUFF.212.1"; class_code "u"; tss_id "TSS147";
1	Cufflinks	exon	26488485	26488915	.	+	.	gene_id "XLOC_000150"; transcript_id "TCONS_00000248"; exon_number "1"; oId "CUFF.288.1"; class_code "u"; tss_id "TSS183";
1	Cufflinks	exon	32396227	32399330	.	+	.	gene_id "XLOC_000159"; transcript_id "TCONS_00000257"; exon_number "1"; oId "CUFF.293.1"; class_code "u"; tss_id "TSS192";
1	Cufflinks	exon	32407122	32408020	.	+	.	gene_id "XLOC_000164"; transcript_id "TCONS_00000262"; exon_number "1"; oId "CUFF.298.1"; class_code "u"; tss_id "TSS197";
1	Cufflinks	exon	32408404	32409138	.	+	.	gene_id "XLOC_000165"; transcript_id "TCONS_00000263"; exon_number "1"; oId "CUFF.299.1"; class_code "u"; tss_id "TSS198";
1	Cufflinks	exon	32410298	32411458	.	+	.	gene_id "XLOC_000167"; transcript_id "TCONS_00000265"; exon_number "1"; oId "CUFF.303.1"; class_code "u"; tss_id "TSS200";
1	Cufflinks	exon	33674219	33675119	.	+	.	gene_id "XLOC_000189"; transcript_id "TCONS_00000288"; exon_number "1"; oId "CUFF.329.1"; class_code "u"; tss_id "TSS222";
1	Cufflinks	exon	33875450	33876251	.	+	.	gene_id "XLOC_000194"; transcript_id "TCONS_00000293"; exon_number "1"; oId "CUFF.336.1"; class_code "u"; tss_id "TSS227";
1	Cufflinks	exon	35781212	35781812	.	+	.	gene_id "XLOC_000210"; transcript_id "TCONS_00000313"; exon_number "1"; oId "CUFF.364.1"; class_code "u"; tss_id "TSS244";
1	Cufflinks	exon	38032033	38033356	.	+	.	gene_id "XLOC_000241"; transcript_id "TCONS_00000350"; exon_number "1"; oId "CUFF.394.1"; class_code "u"; tss_id "TSS277";
1	Cufflinks	exon	44287407	44288976	.	+	.	gene_id "XLOC_000274"; transcript_id "TCONS_00000409"; exon_number "1"; oId "CUFF.448.1"; class_code "u"; tss_id "TSS318";
1	Cufflinks	exon	46411956	46412954	.	+	.	gene_id "XLOC_000303"; transcript_id "TCONS_00000464"; exon_number "1"; gene_name "ZBTB11"; oId "CUFF.530.1"; nearest_ref "ENSBTAT00000017903"; class_code "x"; tss_id "TSS353";
1	Cufflinks	exon	46419878	46420286	.	+	.	gene_id "XLOC_000303"; transcript_id "TCONS_00000464"; exon_number "2"; gene_name "ZBTB11"; oId "CUFF.530.1"; nearest_ref "ENSBTAT00000017903"; class_code "x"; tss_id "TSS353";
1	Cufflinks	exon	46411983	46413680	.	+	.	gene_id "XLOC_000303"; transcript_id "TCONS_00000465"; exon_number "1"; gene_name "ZBTB11"; oId "CUFF.530.2"; nearest_ref "ENSBTAT00000017903"; class_code "x"; tss_id "TSS353";
1	Cufflinks	exon	51298179	51298919	.	+	.	gene_id "XLOC_000321"; transcript_id "TCONS_00000498"; exon_number "1"; oId "CUFF.516.1"; class_code "u"; tss_id "TSS380";
1	Cufflinks	exon	51300368	51301669	.	+	.	gene_id "XLOC_000324"; transcript_id "TCONS_00000501"; exon_number "1"; oId "CUFF.520.1"; class_code "u"; tss_id "TSS383";
1	Cufflinks	exon	51302265	51302628	.	+	.	gene_id "XLOC_000324"; transcript_id "TCONS_00000501"; exon_number "2"; oId "CUFF.520.1"; class_code "u"; tss_id "TSS383";
1	Cufflinks	exon	53979315	53980015	.	+	.	gene_id "XLOC_000339"; transcript_id "TCONS_00000530"; exon_number "1"; oId "CUFF.559.1"; class_code "u"; tss_id "TSS405";
1	Cufflinks	exon	58670922	58672676	.	+	.	gene_id "XLOC_000377"; transcript_id "TCONS_00000618"; exon_number "1"; oId "CUFF.636.1"; class_code "u"; tss_id "TSS459";
1	Cufflinks	exon	61772068	61772274	.	+	.	gene_id "XLOC_000400"; transcript_id "TCONS_00000661"; exon_number "1"; oId "CUFF.685.1"; class_code "u"; tss_id "TSS489";
1	Cufflinks	exon	62712193	62713494	.	+	.	gene_id "XLOC_000411"; transcript_id "TCONS_00000672"; exon_number "1"; oId "CUFF.716.1"; class_code "u"; tss_id "TSS500";
1	Cufflinks	exon	67014862	67015089	.	+	.	gene_id "XLOC_000446"; transcript_id "TCONS_00000738"; exon_number "1"; oId "CUFF.1036.1"; class_code "u"; tss_id "TSS545";
1	Cufflinks	exon	67469022	67469767	.	+	.	gene_id "XLOC_000458"; transcript_id "TCONS_00000763"; exon_number "1"; oId "CUFF.985.1"; class_code "u"; tss_id "TSS559";
1	Cufflinks	exon	67817252	67819205	.	+	.	gene_id "XLOC_000473"; transcript_id "TCONS_00000780"; exon_number "1"; oId "CUFF.1011.1"; class_code "u"; tss_id "TSS574";
1	Cufflinks	exon	67819616	67820769	.	+	.	gene_id "XLOC_000474"; transcript_id "TCONS_00000781"; exon_number "1"; oId "CUFF.1012.1"; class_code "u"; tss_id "TSS575";
1	Cufflinks	exon	67821753	67824935	.	+	.	gene_id "XLOC_000476"; transcript_id "TCONS_00000783"; exon_number "1"; oId "CUFF.1018.1"; class_code "u"; tss_id "TSS577";
1	Cufflinks	exon	67886566	67887062	.	+	.	gene_id "XLOC_000477"; transcript_id "TCONS_00000784"; exon_number "1"; oId "CUFF.1016.1"; class_code "u"; tss_id "TSS578";
1	Cufflinks	exon	67888726	67890000	.	+	.	gene_id "XLOC_000480"; transcript_id "TCONS_00000787"; exon_number "1"; oId "CUFF.1025.1"; class_code "u"; tss_id "TSS581";
1	Cufflinks	exon	67909581	67909800	.	+	.	gene_id "XLOC_000480"; transcript_id "TCONS_00000787"; exon_number "2"; oId "CUFF.1025.1"; class_code "u"; tss_id "TSS581";
1	Cufflinks	exon	67909001	67909766	.	+	.	gene_id "XLOC_000480"; transcript_id "TCONS_00000795"; exon_number "1"; oId "CUFF.1025.2"; class_code "u"; tss_id "TSS582";
1	Cufflinks	exon	67917431	67917457	.	+	.	gene_id "XLOC_000480"; transcript_id "TCONS_00000795"; exon_number "2"; oId "CUFF.1025.2"; class_code "u"; tss_id "TSS582";
1	Cufflinks	exon	67905679	67908808	.	+	.	gene_id "XLOC_000487"; transcript_id "TCONS_00000794"; exon_number "1"; oId "CUFF.1032.1"; class_code "u"; tss_id "TSS589";
1	Cufflinks	exon	67909874	67910879	.	+	.	gene_id "XLOC_000488"; transcript_id "TCONS_00000796"; exon_number "1"; oId "CUFF.1033.1"; class_code "u"; tss_id "TSS590";
1	Cufflinks	exon	68254047	68254892	.	+	.	gene_id "XLOC_000499"; transcript_id "TCONS_00000815"; exon_number "1"; oId "CUFF.1051.1"; class_code "u"; tss_id "TSS605";
1	Cufflinks	exon	68426930	68427015	.	+	.	gene_id "XLOC_000513"; transcript_id "TCONS_00000831"; exon_number "1"; oId "CUFF.1072.1"; class_code "u"; tss_id "TSS619";
1	Cufflinks	exon	68428960	68429454	.	+	.	gene_id "XLOC_000513"; transcript_id "TCONS_00000831"; exon_number "2"; oId "CUFF.1072.1"; class_code "u"; tss_id "TSS619";
1	Cufflinks	exon	69038632	69039046	.	+	.	gene_id "XLOC_000519"; transcript_id "TCONS_00000837"; exon_number "1"; oId "CUFF.1084.1"; class_code "u"; tss_id "TSS625";
1	Cufflinks	exon	69171700	69171932	.	+	.	gene_id "XLOC_000519"; transcript_id "TCONS_00000837"; exon_number "2"; oId "CUFF.1084.1"; class_code "u"; tss_id "TSS625";
1	Cufflinks	exon	69172205	69174625	.	+	.	gene_id "XLOC_000519"; transcript_id "TCONS_00000837"; exon_number "3"; oId "CUFF.1084.1"; class_code "u"; tss_id "TSS625";
1	Cufflinks	exon	69169816	69171932	.	+	.	gene_id "XLOC_000519"; transcript_id "TCONS_00000878"; exon_number "1"; oId "CUFF.1084.3"; class_code "u"; tss_id "TSS626";
1	Cufflinks	exon	69172205	69174625	.	+	.	gene_id "XLOC_000519"; transcript_id "TCONS_00000878"; exon_number "2"; oId "CUFF.1084.3"; class_code "u"; tss_id "TSS626";
1	Cufflinks	exon	69169816	69174625	.	+	.	gene_id "XLOC_000519"; transcript_id "TCONS_00000877"; exon_number "1"; oId "CUFF.1084.2"; class_code "u"; tss_id "TSS626";
1	Cufflinks	exon	69168782	69169730	.	+	.	gene_id "XLOC_000558"; transcript_id "TCONS_00000876"; exon_number "1"; oId "CUFF.1123.1"; class_code "u"; tss_id "TSS665";
1	Cufflinks	exon	73563763	73563818	.	+	.	gene_id "XLOC_000598"; transcript_id "TCONS_00000978"; exon_number "1"; oId "CUFF.1247.1"; class_code "u"; tss_id "TSS714";
1	Cufflinks	exon	73563979	73565017	.	+	.	gene_id "XLOC_000598"; transcript_id "TCONS_00000978"; exon_number "2"; oId "CUFF.1247.1"; class_code "u"; tss_id "TSS714";
1	Cufflinks	exon	73655978	73656263	.	+	.	gene_id "XLOC_000600"; transcript_id "TCONS_00000980"; exon_number "1"; oId "CUFF.1250.1"; class_code "u"; tss_id "TSS716";
1	Cufflinks	exon	73868184	73868495	.	+	.	gene_id "XLOC_000606"; transcript_id "TCONS_00000994"; exon_number "1"; oId "CUFF.1270.1"; class_code "u"; tss_id "TSS725";
1	Cufflinks	exon	73868658	73868688	.	+	.	gene_id "XLOC_000606"; transcript_id "TCONS_00000994"; exon_number "2"; oId "CUFF.1270.1"; class_code "u"; tss_id "TSS725";
1	Cufflinks	exon	73871416	73872073	.	+	.	gene_id "XLOC_000608"; transcript_id "TCONS_00000996"; exon_number "1"; oId "CUFF.1269.1"; class_code "u"; tss_id "TSS727";
1	Cufflinks	exon	73979292	73982086	.	+	.	gene_id "XLOC_000613"; transcript_id "TCONS_00001001"; exon_number "1"; oId "CUFF.1274.1"; class_code "u"; tss_id "TSS732";
1	Cufflinks	exon	74641162	74641898	.	+	.	gene_id "XLOC_000617"; transcript_id "TCONS_00001020"; exon_number "1"; oId "CUFF.1276.1"; class_code "u"; tss_id "TSS740";
1	Cufflinks	exon	79787215	79790316	.	+	.	gene_id "XLOC_000637"; transcript_id "TCONS_00001049"; exon_number "1"; oId "CUFF.1303.1"; class_code "u"; tss_id "TSS764";
1	Cufflinks	exon	79790433	79791505	.	+	.	gene_id "XLOC_000638"; transcript_id "TCONS_00001050"; exon_number "1"; oId "CUFF.1306.1"; class_code "u"; tss_id "TSS765";
1	Cufflinks	exon	80663646	80664745	.	+	.	gene_id "XLOC_000646"; transcript_id "TCONS_00001061"; exon_number "1"; oId "CUFF.1320.1"; class_code "u"; tss_id "TSS775";
1	Cufflinks	exon	81348690	81349343	.	+	.	gene_id "XLOC_000659"; transcript_id "TCONS_00001078"; exon_number "1"; oId "CUFF.1352.1"; class_code "u"; tss_id "TSS790";
1	Cufflinks	exon	82525025	82525991	.	+	.	gene_id "XLOC_000669"; transcript_id "TCONS_00001098"; exon_number "1"; oId "CUFF.1368.1"; class_code "u"; tss_id "TSS801";
1	Cufflinks	exon	83501250	83502018	.	+	.	gene_id "XLOC_000693"; transcript_id "TCONS_00001123"; exon_number "1"; oId "CUFF.1403.1"; class_code "u"; tss_id "TSS825";
1	Cufflinks	exon	83626314	83626881	.	+	.	gene_id "XLOC_000699"; transcript_id "TCONS_00001134"; exon_number "1"; oId "CUFF.1441.1"; class_code "u"; tss_id "TSS831";
1	Cufflinks	exon	83638734	83639610	.	+	.	gene_id "XLOC_000711"; transcript_id "TCONS_00001146"; exon_number "1"; oId "CUFF.1454.1"; class_code "u"; tss_id "TSS843";
1	Cufflinks	exon	83927848	83927897	.	+	.	gene_id "XLOC_000717"; transcript_id "TCONS_00001169"; exon_number "1"; gene_name "YEATS2"; oId "CUFF.1476.1"; nearest_ref "ENSBTAT00000019219"; class_code "x"; tss_id "TSS852";
1	Cufflinks	exon	83929657	83930227	.	+	.	gene_id "XLOC_000717"; transcript_id "TCONS_00001169"; exon_number "2"; gene_name "YEATS2"; oId "CUFF.1476.1"; nearest_ref "ENSBTAT00000019219"; class_code "x"; tss_id "TSS852";
1	Cufflinks	exon	83929089	83930227	.	+	.	gene_id "XLOC_000717"; transcript_id "TCONS_00001170"; exon_number "1"; gene_name "YEATS2"; oId "CUFF.1476.2"; nearest_ref "ENSBTAT00000019219"; class_code "x"; tss_id "TSS853";
1	Cufflinks	exon	84693280	84694078	.	+	.	gene_id "XLOC_000727"; transcript_id "TCONS_00001191"; exon_number "1"; oId "CUFF.1489.1"; class_code "u"; tss_id "TSS868";
1	Cufflinks	exon	87936484	87939553	.	+	.	gene_id "XLOC_000740"; transcript_id "TCONS_00001207"; exon_number "1"; oId "CUFF.1525.1"; class_code "u"; tss_id "TSS882";
1	Cufflinks	exon	96682259	96682891	.	+	.	gene_id "XLOC_000799"; transcript_id "TCONS_00001289"; exon_number "1"; oId "CUFF.1598.1"; class_code "u"; tss_id "TSS946";
1	Cufflinks	exon	96684279	96685080	.	+	.	gene_id "XLOC_000801"; transcript_id "TCONS_00001291"; exon_number "1"; oId "CUFF.1597.1"; class_code "u"; tss_id "TSS948";
1	Cufflinks	exon	101082807	101083066	.	+	.	gene_id "XLOC_000852"; transcript_id "TCONS_00001379"; exon_number "1"; oId "CUFF.1684.1"; class_code "u"; tss_id "TSS1009";
1	Cufflinks	exon	101084171	101084239	.	+	.	gene_id "XLOC_000852"; transcript_id "TCONS_00001379"; exon_number "2"; oId "CUFF.1684.1"; class_code "u"; tss_id "TSS1009";
1	Cufflinks	exon	101085427	101088967	.	+	.	gene_id "XLOC_000852"; transcript_id "TCONS_00001379"; exon_number "3"; oId "CUFF.1684.1"; class_code "u"; tss_id "TSS1009";
1	Cufflinks	exon	101089026	101089574	.	+	.	gene_id "XLOC_000853"; transcript_id "TCONS_00001380"; exon_number "1"; oId "CUFF.1683.1"; class_code "u"; tss_id "TSS1010";
1	Cufflinks	exon	101089961	101094799	.	+	.	gene_id "XLOC_000854"; transcript_id "TCONS_00001381"; exon_number "1"; oId "CUFF.1688.1"; class_code "u"; tss_id "TSS1011";
1	Cufflinks	exon	101097038	101101786	.	+	.	gene_id "XLOC_000856"; transcript_id "TCONS_00001383"; exon_number "1"; oId "CUFF.1687.1"; class_code "u"; tss_id "TSS1013";
1	Cufflinks	exon	101102549	101103309	.	+	.	gene_id "XLOC_000857"; transcript_id "TCONS_00001385"; exon_number "1"; oId "CUFF.1692.2"; class_code "u"; tss_id "TSS1014";
1	Cufflinks	exon	101105306	101105645	.	+	.	gene_id "XLOC_000857"; transcript_id "TCONS_00001385"; exon_number "2"; oId "CUFF.1692.2"; class_code "u"; tss_id "TSS1014";
1	Cufflinks	exon	101102549	101105645	.	+	.	gene_id "XLOC_000857"; transcript_id "TCONS_00001384"; exon_number "1"; oId "CUFF.1692.1"; class_code "u"; tss_id "TSS1014";
1	Cufflinks	exon	101102549	101105277	.	+	.	gene_id "XLOC_000857"; transcript_id "TCONS_00001386"; exon_number "1"; oId "CUFF.1692.3"; class_code "u"; tss_id "TSS1014";
1	Cufflinks	exon	101118606	101118791	.	+	.	gene_id "XLOC_000857"; transcript_id "TCONS_00001386"; exon_number "2"; oId "CUFF.1692.3"; class_code "u"; tss_id "TSS1014";
1	Cufflinks	exon	101105702	101107029	.	+	.	gene_id "XLOC_000858"; transcript_id "TCONS_00001387"; exon_number "1"; oId "CUFF.1693.1"; class_code "u"; tss_id "TSS1015";
1	Cufflinks	exon	101107187	101108370	.	+	.	gene_id "XLOC_000859"; transcript_id "TCONS_00001388"; exon_number "1"; oId "CUFF.1694.1"; class_code "u"; tss_id "TSS1016";
1	Cufflinks	exon	101116515	101117232	.	+	.	gene_id "XLOC_000864"; transcript_id "TCONS_00001393"; exon_number "1"; oId "CUFF.1699.1"; class_code "u"; tss_id "TSS1021";
1	Cufflinks	exon	101120025	101120742	.	+	.	gene_id "XLOC_000867"; transcript_id "TCONS_00001396"; exon_number "1"; oId "CUFF.1689.1"; class_code "u"; tss_id "TSS1024";
1	Cufflinks	exon	101122949	101124069	.	+	.	gene_id "XLOC_000870"; transcript_id "TCONS_00001399"; exon_number "1"; oId "CUFF.1703.1"; class_code "u"; tss_id "TSS1027";
1	Cufflinks	exon	101131707	101131908	.	+	.	gene_id "XLOC_000870"; transcript_id "TCONS_00001399"; exon_number "2"; oId "CUFF.1703.1"; class_code "u"; tss_id "TSS1027";
1	Cufflinks	exon	101133222	101133663	.	+	.	gene_id "XLOC_000870"; transcript_id "TCONS_00001399"; exon_number "3"; oId "CUFF.1703.1"; class_code "u"; tss_id "TSS1027";
1	Cufflinks	exon	101131550	101133663	.	+	.	gene_id "XLOC_000870"; transcript_id "TCONS_00001407"; exon_number "1"; oId "CUFF.1703.2"; class_code "u"; tss_id "TSS1028";
1	Cufflinks	exon	101127605	101131437	.	+	.	gene_id "XLOC_000877"; transcript_id "TCONS_00001406"; exon_number "1"; oId "CUFF.1712.1"; class_code "u"; tss_id "TSS1035";
1	Cufflinks	exon	105891800	105892329	.	+	.	gene_id "XLOC_000902"; transcript_id "TCONS_00001432"; exon_number "1"; oId "CUFF.1727.1"; class_code "u"; tss_id "TSS1060";
1	Cufflinks	exon	112764557	112765187	.	+	.	gene_id "XLOC_000946"; transcript_id "TCONS_00001520"; exon_number "1"; oId "CUFF.1822.1"; class_code "u"; tss_id "TSS1111";
1	Cufflinks	exon	118685147	118686434	.	+	.	gene_id "XLOC_000987"; transcript_id "TCONS_00001575"; exon_number "1"; oId "CUFF.1918.1"; class_code "u"; tss_id "TSS1157";
1	Cufflinks	exon	118688361	118689427	.	+	.	gene_id "XLOC_000990"; transcript_id "TCONS_00001578"; exon_number "1"; oId "CUFF.1919.1"; class_code "u"; tss_id "TSS1160";
1	Cufflinks	exon	118689710	118690085	.	+	.	gene_id "XLOC_000991"; transcript_id "TCONS_00001579"; exon_number "1"; oId "CUFF.1917.1"; class_code "u"; tss_id "TSS1161";
1	Cufflinks	exon	119826194	119827047	.	+	.	gene_id "XLOC_001002"; transcript_id "TCONS_00001597"; exon_number "1"; oId "CUFF.1935.1"; class_code "u"; tss_id "TSS1174";
1	Cufflinks	exon	131564675	131565051	.	+	.	gene_id "XLOC_001059"; transcript_id "TCONS_00001721"; exon_number "1"; gene_name "CEP70"; oId "CUFF.2085.2"; nearest_ref "ENSBTAT00000050229"; class_code "j"; tss_id "TSS1252";
1	Cufflinks	exon	131580575	131580677	.	+	.	gene_id "XLOC_001059"; transcript_id "TCONS_00001721"; exon_number "2"; gene_name "CEP70"; oId "CUFF.2085.2"; nearest_ref "ENSBTAT00000050229"; class_code "j"; tss_id "TSS1252";
1	Cufflinks	exon	131588880	131588939	.	+	.	gene_id "XLOC_001059"; transcript_id "TCONS_00001721"; exon_number "3"; gene_name "CEP70"; oId "CUFF.2085.2"; nearest_ref "ENSBTAT00000050229"; class_code "j"; tss_id "TSS1252";
1	Cufflinks	exon	131591146	131591270	.	+	.	gene_id "XLOC_001059"; transcript_id "TCONS_00001721"; exon_number "4"; gene_name "CEP70"; oId "CUFF.2085.2"; nearest_ref "ENSBTAT00000050229"; class_code "j"; tss_id "TSS1252";
1	Cufflinks	exon	131596123	131596213	.	+	.	gene_id "XLOC_001059"; transcript_id "TCONS_00001721"; exon_number "5"; gene_name "CEP70"; oId "CUFF.2085.2"; nearest_ref "ENSBTAT00000050229"; class_code "j"; tss_id "TSS1252";
1	Cufflinks	exon	131596335	131596458	.	+	.	gene_id "XLOC_001059"; transcript_id "TCONS_00001721"; exon_number "6"; gene_name "CEP70"; oId "CUFF.2085.2"; nearest_ref "ENSBTAT00000050229"; class_code "j"; tss_id "TSS1252";
1	Cufflinks	exon	131596777	131596957	.	+	.	gene_id "XLOC_001059"; transcript_id "TCONS_00001721"; exon_number "7"; gene_name "CEP70"; oId "CUFF.2085.2"; nearest_ref "ENSBTAT00000050229"; class_code "j"; tss_id "TSS1252";
1	Cufflinks	exon	131617772	131617941	.	+	.	gene_id "XLOC_001059"; transcript_id "TCONS_00001721"; exon_number "8"; gene_name "CEP70"; oId "CUFF.2085.2"; nearest_ref "ENSBTAT00000050229"; class_code "j"; tss_id "TSS1252";
1	Cufflinks	exon	131631558	131631642	.	+	.	gene_id "XLOC_001059"; transcript_id "TCONS_00001721"; exon_number "9"; gene_name "CEP70"; oId "CUFF.2085.2"; nearest_ref "ENSBTAT00000050229"; class_code "j"; tss_id "TSS1252";
1	Cufflinks	exon	131631739	131631827	.	+	.	gene_id "XLOC_001059"; transcript_id "TCONS_00001721"; exon_number "10"; gene_name "CEP70"; oId "CUFF.2085.2"; nearest_ref "ENSBTAT00000050229"; class_code "j"; tss_id "TSS1252";
1	Cufflinks	exon	131633369	131633443	.	+	.	gene_id "XLOC_001059"; transcript_id "TCONS_00001721"; exon_number "11"; gene_name "CEP70"; oId "CUFF.2085.2"; nearest_ref "ENSBTAT00000050229"; class_code "j"; tss_id "TSS1252";
1	Cufflinks	exon	131642692	131642797	.	+	.	gene_id "XLOC_001059"; transcript_id "TCONS_00001721"; exon_number "12"; gene_name "CEP70"; oId "CUFF.2085.2"; nearest_ref "ENSBTAT00000050229"; class_code "j"; tss_id "TSS1252";
1	Cufflinks	exon	131651738	131651908	.	+	.	gene_id "XLOC_001059"; transcript_id "TCONS_00001721"; exon_number "13"; gene_name "CEP70"; oId "CUFF.2085.2"; nearest_ref "ENSBTAT00000050229"; class_code "j"; tss_id "TSS1252";
1	Cufflinks	exon	131653843	131653989	.	+	.	gene_id "XLOC_001059"; transcript_id "TCONS_00001721"; exon_number "14"; gene_name "CEP70"; oId "CUFF.2085.2"; nearest_ref "ENSBTAT00000050229"; class_code "j"; tss_id "TSS1252";
1	Cufflinks	exon	131654153	131654321	.	+	.	gene_id "XLOC_001059"; transcript_id "TCONS_00001721"; exon_number "15"; gene_name "CEP70"; oId "CUFF.2085.2"; nearest_ref "ENSBTAT00000050229"; class_code "j"; tss_id "TSS1252";
1	Cufflinks	exon	131654675	131654789	.	+	.	gene_id "XLOC_001059"; transcript_id "TCONS_00001721"; exon_number "16"; gene_name "CEP70"; oId "CUFF.2085.2"; nearest_ref "ENSBTAT00000050229"; class_code "j"; tss_id "TSS1252";
1	Cufflinks	exon	131656063	131656142	.	+	.	gene_id "XLOC_001059"; transcript_id "TCONS_00001721"; exon_number "17"; gene_name "CEP70"; oId "CUFF.2085.2"; nearest_ref "ENSBTAT00000050229"; class_code "j"; tss_id "TSS1252";
1	Cufflinks	exon	131657992	131659228	.	+	.	gene_id "XLOC_001059"; transcript_id "TCONS_00001721"; exon_number "18"; gene_name "CEP70"; oId "CUFF.2085.2"; nearest_ref "ENSBTAT00000050229"; class_code "j"; tss_id "TSS1252";
1	Cufflinks	exon	131564675	131565051	.	+	.	gene_id "XLOC_001059"; transcript_id "TCONS_00001720"; exon_number "1"; gene_name "CEP70"; oId "CUFF.2085.1"; nearest_ref "ENSBTAT00000050229"; class_code "j"; tss_id "TSS1252";
1	Cufflinks	exon	131580575	131580677	.	+	.	gene_id "XLOC_001059"; transcript_id "TCONS_00001720"; exon_number "2"; gene_name "CEP70"; oId "CUFF.2085.1"; nearest_ref "ENSBTAT00000050229"; class_code "j"; tss_id "TSS1252";
1	Cufflinks	exon	131591146	131591270	.	+	.	gene_id "XLOC_001059"; transcript_id "TCONS_00001720"; exon_number "3"; gene_name "CEP70"; oId "CUFF.2085.1"; nearest_ref "ENSBTAT00000050229"; class_code "j"; tss_id "TSS1252";
1	Cufflinks	exon	131596123	131596213	.	+	.	gene_id "XLOC_001059"; transcript_id "TCONS_00001720"; exon_number "4"; gene_name "CEP70"; oId "CUFF.2085.1"; nearest_ref "ENSBTAT00000050229"; class_code "j"; tss_id "TSS1252";
1	Cufflinks	exon	131596335	131596458	.	+	.	gene_id "XLOC_001059"; transcript_id "TCONS_00001720"; exon_number "5"; gene_name "CEP70"; oId "CUFF.2085.1"; nearest_ref "ENSBTAT00000050229"; class_code "j"; tss_id "TSS1252";
1	Cufflinks	exon	131596777	131596957	.	+	.	gene_id "XLOC_001059"; transcript_id "TCONS_00001720"; exon_number "6"; gene_name "CEP70"; oId "CUFF.2085.1"; nearest_ref "ENSBTAT00000050229"; class_code "j"; tss_id "TSS1252";
1	Cufflinks	exon	131617772	131617941	.	+	.	gene_id "XLOC_001059"; transcript_id "TCONS_00001720"; exon_number "7"; gene_name "CEP70"; oId "CUFF.2085.1"; nearest_ref "ENSBTAT00000050229"; class_code "j"; tss_id "TSS1252";
1	Cufflinks	exon	131631558	131631642	.	+	.	gene_id "XLOC_001059"; transcript_id "TCONS_00001720"; exon_number "8"; gene_name "CEP70"; oId "CUFF.2085.1"; nearest_ref "ENSBTAT00000050229"; class_code "j"; tss_id "TSS1252";
1	Cufflinks	exon	131631739	131631827	.	+	.	gene_id "XLOC_001059"; transcript_id "TCONS_00001720"; exon_number "9"; gene_name "CEP70"; oId "CUFF.2085.1"; nearest_ref "ENSBTAT00000050229"; class_code "j"; tss_id "TSS1252";
1	Cufflinks	exon	131633369	131633443	.	+	.	gene_id "XLOC_001059"; transcript_id "TCONS_00001720"; exon_number "10"; gene_name "CEP70"; oId "CUFF.2085.1"; nearest_ref "ENSBTAT00000050229"; class_code "j"; tss_id "TSS1252";
1	Cufflinks	exon	131642692	131642797	.	+	.	gene_id "XLOC_001059"; transcript_id "TCONS_00001720"; exon_number "11"; gene_name "CEP70"; oId "CUFF.2085.1"; nearest_ref "ENSBTAT00000050229"; class_code "j"; tss_id "TSS1252";
1	Cufflinks	exon	131651738	131651908	.	+	.	gene_id "XLOC_001059"; transcript_id "TCONS_00001720"; exon_number "12"; gene_name "CEP70"; oId "CUFF.2085.1"; nearest_ref "ENSBTAT00000050229"; class_code "j"; tss_id "TSS1252";
1	Cufflinks	exon	131653843	131653989	.	+	.	gene_id "XLOC_001059"; transcript_id "TCONS_00001720"; exon_number "13"; gene_name "CEP70"; oId "CUFF.2085.1"; nearest_ref "ENSBTAT00000050229"; class_code "j"; tss_id "TSS1252";
1	Cufflinks	exon	131654153	131654321	.	+	.	gene_id "XLOC_001059"; transcript_id "TCONS_00001720"; exon_number "14"; gene_name "CEP70"; oId "CUFF.2085.1"; nearest_ref "ENSBTAT00000050229"; class_code "j"; tss_id "TSS1252";
1	Cufflinks	exon	131654675	131654789	.	+	.	gene_id "XLOC_001059"; transcript_id "TCONS_00001720"; exon_number "15"; gene_name "CEP70"; oId "CUFF.2085.1"; nearest_ref "ENSBTAT00000050229"; class_code "j"; tss_id "TSS1252";
1	Cufflinks	exon	131656063	131656142	.	+	.	gene_id "XLOC_001059"; transcript_id "TCONS_00001720"; exon_number "16"; gene_name "CEP70"; oId "CUFF.2085.1"; nearest_ref "ENSBTAT00000050229"; class_code "j"; tss_id "TSS1252";
1	Cufflinks	exon	131657992	131659228	.	+	.	gene_id "XLOC_001059"; transcript_id "TCONS_00001720"; exon_number "17"; gene_name "CEP70"; oId "CUFF.2085.1"; nearest_ref "ENSBTAT00000050229"; class_code "j"; tss_id "TSS1252";
1	Cufflinks	exon	131564871	131565051	.	+	.	gene_id "XLOC_001059"; transcript_id "TCONS_00001722"; exon_number "1"; gene_name "CEP70"; oId "CUFF.2085.3"; nearest_ref "ENSBTAT00000050229"; class_code "j"; tss_id "TSS1253";
1	Cufflinks	exon	131580575	131580677	.	+	.	gene_id "XLOC_001059"; transcript_id "TCONS_00001722"; exon_number "2"; gene_name "CEP70"; oId "CUFF.2085.3"; nearest_ref "ENSBTAT00000050229"; class_code "j"; tss_id "TSS1253";
1	Cufflinks	exon	131591146	131591270	.	+	.	gene_id "XLOC_001059"; transcript_id "TCONS_00001722"; exon_number "3"; gene_name "CEP70"; oId "CUFF.2085.3"; nearest_ref "ENSBTAT00000050229"; class_code "j"; tss_id "TSS1253";
1	Cufflinks	exon	131596123	131596213	.	+	.	gene_id "XLOC_001059"; transcript_id "TCONS_00001722"; exon_number "4"; gene_name "CEP70"; oId "CUFF.2085.3"; nearest_ref "ENSBTAT00000050229"; class_code "j"; tss_id "TSS1253";
1	Cufflinks	exon	131596335	131596458	.	+	.	gene_id "XLOC_001059"; transcript_id "TCONS_00001722"; exon_number "5"; gene_name "CEP70"; oId "CUFF.2085.3"; nearest_ref "ENSBTAT00000050229"; class_code "j"; tss_id "TSS1253";
1	Cufflinks	exon	131596777	131596957	.	+	.	gene_id "XLOC_001059"; transcript_id "TCONS_00001722"; exon_number "6"; gene_name "CEP70"; oId "CUFF.2085.3"; nearest_ref "ENSBTAT00000050229"; class_code "j"; tss_id "TSS1253";
1	Cufflinks	exon	131617772	131617941	.	+	.	gene_id "XLOC_001059"; transcript_id "TCONS_00001722"; exon_number "7"; gene_name "CEP70"; oId "CUFF.2085.3"; nearest_ref "ENSBTAT00000050229"; class_code "j"; tss_id "TSS1253";
1	Cufflinks	exon	131620739	131620795	.	+	.	gene_id "XLOC_001059"; transcript_id "TCONS_00001722"; exon_number "8"; gene_name "CEP70"; oId "CUFF.2085.3"; nearest_ref "ENSBTAT00000050229"; class_code "j"; tss_id "TSS1253";
1	Cufflinks	exon	131631558	131631642	.	+	.	gene_id "XLOC_001059"; transcript_id "TCONS_00001722"; exon_number "9"; gene_name "CEP70"; oId "CUFF.2085.3"; nearest_ref "ENSBTAT00000050229"; class_code "j"; tss_id "TSS1253";
1	Cufflinks	exon	131631739	131631827	.	+	.	gene_id "XLOC_001059"; transcript_id "TCONS_00001722"; exon_number "10"; gene_name "CEP70"; oId "CUFF.2085.3"; nearest_ref "ENSBTAT00000050229"; class_code "j"; tss_id "TSS1253";
1	Cufflinks	exon	131633369	131633443	.	+	.	gene_id "XLOC_001059"; transcript_id "TCONS_00001722"; exon_number "11"; gene_name "CEP70"; oId "CUFF.2085.3"; nearest_ref "ENSBTAT00000050229"; class_code "j"; tss_id "TSS1253";
1	Cufflinks	exon	131642692	131642797	.	+	.	gene_id "XLOC_001059"; transcript_id "TCONS_00001722"; exon_number "12"; gene_name "CEP70"; oId "CUFF.2085.3"; nearest_ref "ENSBTAT00000050229"; class_code "j"; tss_id "TSS1253";
1	Cufflinks	exon	131651738	131651908	.	+	.	gene_id "XLOC_001059"; transcript_id "TCONS_00001722"; exon_number "13"; gene_name "CEP70"; oId "CUFF.2085.3"; nearest_ref "ENSBTAT00000050229"; class_code "j"; tss_id "TSS1253";
1	Cufflinks	exon	131653843	131653989	.	+	.	gene_id "XLOC_001059"; transcript_id "TCONS_00001722"; exon_number "14"; gene_name "CEP70"; oId "CUFF.2085.3"; nearest_ref "ENSBTAT00000050229"; class_code "j"; tss_id "TSS1253";
1	Cufflinks	exon	131654153	131654321	.	+	.	gene_id "XLOC_001059"; transcript_id "TCONS_00001722"; exon_number "15"; gene_name "CEP70"; oId "CUFF.2085.3"; nearest_ref "ENSBTAT00000050229"; class_code "j"; tss_id "TSS1253";
1	Cufflinks	exon	131654675	131654789	.	+	.	gene_id "XLOC_001059"; transcript_id "TCONS_00001722"; exon_number "16"; gene_name "CEP70"; oId "CUFF.2085.3"; nearest_ref "ENSBTAT00000050229"; class_code "j"; tss_id "TSS1253";
1	Cufflinks	exon	131656063	131656142	.	+	.	gene_id "XLOC_001059"; transcript_id "TCONS_00001722"; exon_number "17"; gene_name "CEP70"; oId "CUFF.2085.3"; nearest_ref "ENSBTAT00000050229"; class_code "j"; tss_id "TSS1253";
1	Cufflinks	exon	131657992	131659228	.	+	.	gene_id "XLOC_001059"; transcript_id "TCONS_00001722"; exon_number "18"; gene_name "CEP70"; oId "CUFF.2085.3"; nearest_ref "ENSBTAT00000050229"; class_code "j"; tss_id "TSS1253";
1	Cufflinks	exon	131564959	131565051	.	+	.	gene_id "XLOC_001059"; transcript_id "TCONS_00001723"; exon_number "1"; oId "CUFF.2085.4"; class_code "u"; tss_id "TSS1253";
1	Cufflinks	exon	131567347	131568246	.	+	.	gene_id "XLOC_001059"; transcript_id "TCONS_00001723"; exon_number "2"; oId "CUFF.2085.4"; class_code "u"; tss_id "TSS1253";
1	Cufflinks	exon	131576638	131577632	.	+	.	gene_id "XLOC_001059"; transcript_id "TCONS_00001729"; exon_number "1"; gene_name "CEP70"; oId "CUFF.2085.7"; nearest_ref "ENSBTAT00000050229"; class_code "j"; tss_id "TSS1254";
1	Cufflinks	exon	131580575	131580677	.	+	.	gene_id "XLOC_001059"; transcript_id "TCONS_00001729"; exon_number "2"; gene_name "CEP70"; oId "CUFF.2085.7"; nearest_ref "ENSBTAT00000050229"; class_code "j"; tss_id "TSS1254";
1	Cufflinks	exon	131591146	131591270	.	+	.	gene_id "XLOC_001059"; transcript_id "TCONS_00001729"; exon_number "3"; gene_name "CEP70"; oId "CUFF.2085.7"; nearest_ref "ENSBTAT00000050229"; class_code "j"; tss_id "TSS1254";
1	Cufflinks	exon	131596123	131596213	.	+	.	gene_id "XLOC_001059"; transcript_id "TCONS_00001729"; exon_number "4"; gene_name "CEP70"; oId "CUFF.2085.7"; nearest_ref "ENSBTAT00000050229"; class_code "j"; tss_id "TSS1254";
1	Cufflinks	exon	131596335	131596458	.	+	.	gene_id "XLOC_001059"; transcript_id "TCONS_00001729"; exon_number "5"; gene_name "CEP70"; oId "CUFF.2085.7"; nearest_ref "ENSBTAT00000050229"; class_code "j"; tss_id "TSS1254";
1	Cufflinks	exon	131596777	131596957	.	+	.	gene_id "XLOC_001059"; transcript_id "TCONS_00001729"; exon_number "6"; gene_name "CEP70"; oId "CUFF.2085.7"; nearest_ref "ENSBTAT00000050229"; class_code "j"; tss_id "TSS1254";
1	Cufflinks	exon	131617772	131617941	.	+	.	gene_id "XLOC_001059"; transcript_id "TCONS_00001729"; exon_number "7"; gene_name "CEP70"; oId "CUFF.2085.7"; nearest_ref "ENSBTAT00000050229"; class_code "j"; tss_id "TSS1254";
1	Cufflinks	exon	131631558	131631642	.	+	.	gene_id "XLOC_001059"; transcript_id "TCONS_00001729"; exon_number "8"; gene_name "CEP70"; oId "CUFF.2085.7"; nearest_ref "ENSBTAT00000050229"; class_code "j"; tss_id "TSS1254";
1	Cufflinks	exon	131631739	131631827	.	+	.	gene_id "XLOC_001059"; transcript_id "TCONS_00001729"; exon_number "9"; gene_name "CEP70"; oId "CUFF.2085.7"; nearest_ref "ENSBTAT00000050229"; class_code "j"; tss_id "TSS1254";
1	Cufflinks	exon	131633369	131633443	.	+	.	gene_id "XLOC_001059"; transcript_id "TCONS_00001729"; exon_number "10"; gene_name "CEP70"; oId "CUFF.2085.7"; nearest_ref "ENSBTAT00000050229"; class_code "j"; tss_id "TSS1254";
1	Cufflinks	exon	131642692	131642797	.	+	.	gene_id "XLOC_001059"; transcript_id "TCONS_00001729"; exon_number "11"; gene_name "CEP70"; oId "CUFF.2085.7"; nearest_ref "ENSBTAT00000050229"; class_code "j"; tss_id "TSS1254";
1	Cufflinks	exon	131651738	131651908	.	+	.	gene_id "XLOC_001059"; transcript_id "TCONS_00001729"; exon_number "12"; gene_name "CEP70"; oId "CUFF.2085.7"; nearest_ref "ENSBTAT00000050229"; class_code "j"; tss_id "TSS1254";
1	Cufflinks	exon	131653843	131653989	.	+	.	gene_id "XLOC_001059"; transcript_id "TCONS_00001729"; exon_number "13"; gene_name "CEP70"; oId "CUFF.2085.7"; nearest_ref "ENSBTAT00000050229"; class_code "j"; tss_id "TSS1254";
1	Cufflinks	exon	131654153	131654321	.	+	.	gene_id "XLOC_001059"; transcript_id "TCONS_00001729"; exon_number "14"; gene_name "CEP70"; oId "CUFF.2085.7"; nearest_ref "ENSBTAT00000050229"; class_code "j"; tss_id "TSS1254";
1	Cufflinks	exon	131654675	131654789	.	+	.	gene_id "XLOC_001059"; transcript_id "TCONS_00001729"; exon_number "15"; gene_name "CEP70"; oId "CUFF.2085.7"; nearest_ref "ENSBTAT00000050229"; class_code "j"; tss_id "TSS1254";
1	Cufflinks	exon	131656063	131659228	.	+	.	gene_id "XLOC_001059"; transcript_id "TCONS_00001729"; exon_number "16"; gene_name "CEP70"; oId "CUFF.2085.7"; nearest_ref "ENSBTAT00000050229"; class_code "j"; tss_id "TSS1254";
1	Cufflinks	exon	131576638	131577632	.	+	.	gene_id "XLOC_001059"; transcript_id "TCONS_00001728"; exon_number "1"; gene_name "CEP70"; oId "CUFF.2085.6"; nearest_ref "ENSBTAT00000050229"; class_code "j"; tss_id "TSS1254";
1	Cufflinks	exon	131580575	131580677	.	+	.	gene_id "XLOC_001059"; transcript_id "TCONS_00001728"; exon_number "2"; gene_name "CEP70"; oId "CUFF.2085.6"; nearest_ref "ENSBTAT00000050229"; class_code "j"; tss_id "TSS1254";
1	Cufflinks	exon	131591146	131591270	.	+	.	gene_id "XLOC_001059"; transcript_id "TCONS_00001728"; exon_number "3"; gene_name "CEP70"; oId "CUFF.2085.6"; nearest_ref "ENSBTAT00000050229"; class_code "j"; tss_id "TSS1254";
1	Cufflinks	exon	131596123	131596213	.	+	.	gene_id "XLOC_001059"; transcript_id "TCONS_00001728"; exon_number "4"; gene_name "CEP70"; oId "CUFF.2085.6"; nearest_ref "ENSBTAT00000050229"; class_code "j"; tss_id "TSS1254";
1	Cufflinks	exon	131596335	131596458	.	+	.	gene_id "XLOC_001059"; transcript_id "TCONS_00001728"; exon_number "5"; gene_name "CEP70"; oId "CUFF.2085.6"; nearest_ref "ENSBTAT00000050229"; class_code "j"; tss_id "TSS1254";
1	Cufflinks	exon	131596777	131596957	.	+	.	gene_id "XLOC_001059"; transcript_id "TCONS_00001728"; exon_number "6"; gene_name "CEP70"; oId "CUFF.2085.6"; nearest_ref "ENSBTAT00000050229"; class_code "j"; tss_id "TSS1254";
1	Cufflinks	exon	131617772	131617941	.	+	.	gene_id "XLOC_001059"; transcript_id "TCONS_00001728"; exon_number "7"; gene_name "CEP70"; oId "CUFF.2085.6"; nearest_ref "ENSBTAT00000050229"; class_code "j"; tss_id "TSS1254";
1	Cufflinks	exon	131631558	131631642	.	+	.	gene_id "XLOC_001059"; transcript_id "TCONS_00001728"; exon_number "8"; gene_name "CEP70"; oId "CUFF.2085.6"; nearest_ref "ENSBTAT00000050229"; class_code "j"; tss_id "TSS1254";
1	Cufflinks	exon	131631739	131631827	.	+	.	gene_id "XLOC_001059"; transcript_id "TCONS_00001728"; exon_number "9"; gene_name "CEP70"; oId "CUFF.2085.6"; nearest_ref "ENSBTAT00000050229"; class_code "j"; tss_id "TSS1254";
1	Cufflinks	exon	131633369	131633443	.	+	.	gene_id "XLOC_001059"; transcript_id "TCONS_00001728"; exon_number "10"; gene_name "CEP70"; oId "CUFF.2085.6"; nearest_ref "ENSBTAT00000050229"; class_code "j"; tss_id "TSS1254";
1	Cufflinks	exon	131642692	131642797	.	+	.	gene_id "XLOC_001059"; transcript_id "TCONS_00001728"; exon_number "11"; gene_name "CEP70"; oId "CUFF.2085.6"; nearest_ref "ENSBTAT00000050229"; class_code "j"; tss_id "TSS1254";
1	Cufflinks	exon	131651738	131651908	.	+	.	gene_id "XLOC_001059"; transcript_id "TCONS_00001728"; exon_number "12"; gene_name "CEP70"; oId "CUFF.2085.6"; nearest_ref "ENSBTAT00000050229"; class_code "j"; tss_id "TSS1254";
1	Cufflinks	exon	131653843	131653989	.	+	.	gene_id "XLOC_001059"; transcript_id "TCONS_00001728"; exon_number "13"; gene_name "CEP70"; oId "CUFF.2085.6"; nearest_ref "ENSBTAT00000050229"; class_code "j"; tss_id "TSS1254";
1	Cufflinks	exon	131654153	131654321	.	+	.	gene_id "XLOC_001059"; transcript_id "TCONS_00001728"; exon_number "14"; gene_name "CEP70"; oId "CUFF.2085.6"; nearest_ref "ENSBTAT00000050229"; class_code "j"; tss_id "TSS1254";
1	Cufflinks	exon	131654675	131654789	.	+	.	gene_id "XLOC_001059"; transcript_id "TCONS_00001728"; exon_number "15"; gene_name "CEP70"; oId "CUFF.2085.6"; nearest_ref "ENSBTAT00000050229"; class_code "j"; tss_id "TSS1254";
1	Cufflinks	exon	131656063	131656142	.	+	.	gene_id "XLOC_001059"; transcript_id "TCONS_00001728"; exon_number "16"; gene_name "CEP70"; oId "CUFF.2085.6"; nearest_ref "ENSBTAT00000050229"; class_code "j"; tss_id "TSS1254";
1	Cufflinks	exon	131657992	131659228	.	+	.	gene_id "XLOC_001059"; transcript_id "TCONS_00001728"; exon_number "17"; gene_name "CEP70"; oId "CUFF.2085.6"; nearest_ref "ENSBTAT00000050229"; class_code "j"; tss_id "TSS1254";
1	Cufflinks	exon	131576638	131577632	.	+	.	gene_id "XLOC_001059"; transcript_id "TCONS_00001727"; exon_number "1"; gene_name "CEP70"; oId "CUFF.2085.5"; nearest_ref "ENSBTAT00000050229"; class_code "j"; tss_id "TSS1254";
1	Cufflinks	exon	131580575	131580677	.	+	.	gene_id "XLOC_001059"; transcript_id "TCONS_00001727"; exon_number "2"; gene_name "CEP70"; oId "CUFF.2085.5"; nearest_ref "ENSBTAT00000050229"; class_code "j"; tss_id "TSS1254";
1	Cufflinks	exon	131591146	131591270	.	+	.	gene_id "XLOC_001059"; transcript_id "TCONS_00001727"; exon_number "3"; gene_name "CEP70"; oId "CUFF.2085.5"; nearest_ref "ENSBTAT00000050229"; class_code "j"; tss_id "TSS1254";
1	Cufflinks	exon	131596123	131596213	.	+	.	gene_id "XLOC_001059"; transcript_id "TCONS_00001727"; exon_number "4"; gene_name "CEP70"; oId "CUFF.2085.5"; nearest_ref "ENSBTAT00000050229"; class_code "j"; tss_id "TSS1254";
1	Cufflinks	exon	131596335	131596458	.	+	.	gene_id "XLOC_001059"; transcript_id "TCONS_00001727"; exon_number "5"; gene_name "CEP70"; oId "CUFF.2085.5"; nearest_ref "ENSBTAT00000050229"; class_code "j"; tss_id "TSS1254";
1	Cufflinks	exon	131596777	131596957	.	+	.	gene_id "XLOC_001059"; transcript_id "TCONS_00001727"; exon_number "6"; gene_name "CEP70"; oId "CUFF.2085.5"; nearest_ref "ENSBTAT00000050229"; class_code "j"; tss_id "TSS1254";
1	Cufflinks	exon	131617772	131617941	.	+	.	gene_id "XLOC_001059"; transcript_id "TCONS_00001727"; exon_number "7"; gene_name "CEP70"; oId "CUFF.2085.5"; nearest_ref "ENSBTAT00000050229"; class_code "j"; tss_id "TSS1254";
1	Cufflinks	exon	131620739	131620795	.	+	.	gene_id "XLOC_001059"; transcript_id "TCONS_00001727"; exon_number "8"; gene_name "CEP70"; oId "CUFF.2085.5"; nearest_ref "ENSBTAT00000050229"; class_code "j"; tss_id "TSS1254";
1	Cufflinks	exon	131631558	131631642	.	+	.	gene_id "XLOC_001059"; transcript_id "TCONS_00001727"; exon_number "9"; gene_name "CEP70"; oId "CUFF.2085.5"; nearest_ref "ENSBTAT00000050229"; class_code "j"; tss_id "TSS1254";
1	Cufflinks	exon	131631739	131631827	.	+	.	gene_id "XLOC_001059"; transcript_id "TCONS_00001727"; exon_number "10"; gene_name "CEP70"; oId "CUFF.2085.5"; nearest_ref "ENSBTAT00000050229"; class_code "j"; tss_id "TSS1254";
1	Cufflinks	exon	131633369	131633443	.	+	.	gene_id "XLOC_001059"; transcript_id "TCONS_00001727"; exon_number "11"; gene_name "CEP70"; oId "CUFF.2085.5"; nearest_ref "ENSBTAT00000050229"; class_code "j"; tss_id "TSS1254";
1	Cufflinks	exon	131642692	131642797	.	+	.	gene_id "XLOC_001059"; transcript_id "TCONS_00001727"; exon_number "12"; gene_name "CEP70"; oId "CUFF.2085.5"; nearest_ref "ENSBTAT00000050229"; class_code "j"; tss_id "TSS1254";
1	Cufflinks	exon	131651738	131651908	.	+	.	gene_id "XLOC_001059"; transcript_id "TCONS_00001727"; exon_number "13"; gene_name "CEP70"; oId "CUFF.2085.5"; nearest_ref "ENSBTAT00000050229"; class_code "j"; tss_id "TSS1254";
1	Cufflinks	exon	131653843	131653989	.	+	.	gene_id "XLOC_001059"; transcript_id "TCONS_00001727"; exon_number "14"; gene_name "CEP70"; oId "CUFF.2085.5"; nearest_ref "ENSBTAT00000050229"; class_code "j"; tss_id "TSS1254";
1	Cufflinks	exon	131654153	131654321	.	+	.	gene_id "XLOC_001059"; transcript_id "TCONS_00001727"; exon_number "15"; gene_name "CEP70"; oId "CUFF.2085.5"; nearest_ref "ENSBTAT00000050229"; class_code "j"; tss_id "TSS1254";
1	Cufflinks	exon	131654675	131654789	.	+	.	gene_id "XLOC_001059"; transcript_id "TCONS_00001727"; exon_number "16"; gene_name "CEP70"; oId "CUFF.2085.5"; nearest_ref "ENSBTAT00000050229"; class_code "j"; tss_id "TSS1254";
1	Cufflinks	exon	131656063	131656142	.	+	.	gene_id "XLOC_001059"; transcript_id "TCONS_00001727"; exon_number "17"; gene_name "CEP70"; oId "CUFF.2085.5"; nearest_ref "ENSBTAT00000050229"; class_code "j"; tss_id "TSS1254";
1	Cufflinks	exon	131657992	131659228	.	+	.	gene_id "XLOC_001059"; transcript_id "TCONS_00001727"; exon_number "18"; gene_name "CEP70"; oId "CUFF.2085.5"; nearest_ref "ENSBTAT00000050229"; class_code "j"; tss_id "TSS1254";
1	Cufflinks	exon	131578619	131578687	.	+	.	gene_id "XLOC_001059"; transcript_id "TCONS_00001730"; exon_number "1"; gene_name "CEP70"; oId "CUFF.2085.8"; nearest_ref "ENSBTAT00000050229"; class_code "j"; tss_id "TSS1255";
1	Cufflinks	exon	131580575	131580677	.	+	.	gene_id "XLOC_001059"; transcript_id "TCONS_00001730"; exon_number "2"; gene_name "CEP70"; oId "CUFF.2085.8"; nearest_ref "ENSBTAT00000050229"; class_code "j"; tss_id "TSS1255";
1	Cufflinks	exon	131591146	131591270	.	+	.	gene_id "XLOC_001059"; transcript_id "TCONS_00001730"; exon_number "3"; gene_name "CEP70"; oId "CUFF.2085.8"; nearest_ref "ENSBTAT00000050229"; class_code "j"; tss_id "TSS1255";
1	Cufflinks	exon	131596123	131596213	.	+	.	gene_id "XLOC_001059"; transcript_id "TCONS_00001730"; exon_number "4"; gene_name "CEP70"; oId "CUFF.2085.8"; nearest_ref "ENSBTAT00000050229"; class_code "j"; tss_id "TSS1255";
1	Cufflinks	exon	131596335	131596458	.	+	.	gene_id "XLOC_001059"; transcript_id "TCONS_00001730"; exon_number "5"; gene_name "CEP70"; oId "CUFF.2085.8"; nearest_ref "ENSBTAT00000050229"; class_code "j"; tss_id "TSS1255";
1	Cufflinks	exon	131596777	131596957	.	+	.	gene_id "XLOC_001059"; transcript_id "TCONS_00001730"; exon_number "6"; gene_name "CEP70"; oId "CUFF.2085.8"; nearest_ref "ENSBTAT00000050229"; class_code "j"; tss_id "TSS1255";
1	Cufflinks	exon	131617772	131617941	.	+	.	gene_id "XLOC_001059"; transcript_id "TCONS_00001730"; exon_number "7"; gene_name "CEP70"; oId "CUFF.2085.8"; nearest_ref "ENSBTAT00000050229"; class_code "j"; tss_id "TSS1255";
1	Cufflinks	exon	131620739	131620795	.	+	.	gene_id "XLOC_001059"; transcript_id "TCONS_00001730"; exon_number "8"; gene_name "CEP70"; oId "CUFF.2085.8"; nearest_ref "ENSBTAT00000050229"; class_code "j"; tss_id "TSS1255";
1	Cufflinks	exon	131631558	131631642	.	+	.	gene_id "XLOC_001059"; transcript_id "TCONS_00001730"; exon_number "9"; gene_name "CEP70"; oId "CUFF.2085.8"; nearest_ref "ENSBTAT00000050229"; class_code "j"; tss_id "TSS1255";
1	Cufflinks	exon	131631739	131631827	.	+	.	gene_id "XLOC_001059"; transcript_id "TCONS_00001730"; exon_number "10"; gene_name "CEP70"; oId "CUFF.2085.8"; nearest_ref "ENSBTAT00000050229"; class_code "j"; tss_id "TSS1255";
1	Cufflinks	exon	131633369	131633443	.	+	.	gene_id "XLOC_001059"; transcript_id "TCONS_00001730"; exon_number "11"; gene_name "CEP70"; oId "CUFF.2085.8"; nearest_ref "ENSBTAT00000050229"; class_code "j"; tss_id "TSS1255";
1	Cufflinks	exon	131642692	131642797	.	+	.	gene_id "XLOC_001059"; transcript_id "TCONS_00001730"; exon_number "12"; gene_name "CEP70"; oId "CUFF.2085.8"; nearest_ref "ENSBTAT00000050229"; class_code "j"; tss_id "TSS1255";
1	Cufflinks	exon	131651738	131651908	.	+	.	gene_id "XLOC_001059"; transcript_id "TCONS_00001730"; exon_number "13"; gene_name "CEP70"; oId "CUFF.2085.8"; nearest_ref "ENSBTAT00000050229"; class_code "j"; tss_id "TSS1255";
1	Cufflinks	exon	131653843	131653989	.	+	.	gene_id "XLOC_001059"; transcript_id "TCONS_00001730"; exon_number "14"; gene_name "CEP70"; oId "CUFF.2085.8"; nearest_ref "ENSBTAT00000050229"; class_code "j"; tss_id "TSS1255";
1	Cufflinks	exon	131654153	131654321	.	+	.	gene_id "XLOC_001059"; transcript_id "TCONS_00001730"; exon_number "15"; gene_name "CEP70"; oId "CUFF.2085.8"; nearest_ref "ENSBTAT00000050229"; class_code "j"; tss_id "TSS1255";
1	Cufflinks	exon	131654675	131654789	.	+	.	gene_id "XLOC_001059"; transcript_id "TCONS_00001730"; exon_number "16"; gene_name "CEP70"; oId "CUFF.2085.8"; nearest_ref "ENSBTAT00000050229"; class_code "j"; tss_id "TSS1255";
1	Cufflinks	exon	131656063	131656142	.	+	.	gene_id "XLOC_001059"; transcript_id "TCONS_00001730"; exon_number "17"; gene_name "CEP70"; oId "CUFF.2085.8"; nearest_ref "ENSBTAT00000050229"; class_code "j"; tss_id "TSS1255";
1	Cufflinks	exon	131657992	131659228	.	+	.	gene_id "XLOC_001059"; transcript_id "TCONS_00001730"; exon_number "18"; gene_name "CEP70"; oId "CUFF.2085.8"; nearest_ref "ENSBTAT00000050229"; class_code "j"; tss_id "TSS1255";
1	Cufflinks	exon	131578625	131578687	.	+	.	gene_id "XLOC_001059"; transcript_id "TCONS_00001731"; exon_number "1"; gene_name "CEP70"; oId "CUFF.2085.9"; nearest_ref "ENSBTAT00000050229"; class_code "j"; tss_id "TSS1255";
1	Cufflinks	exon	131580575	131580677	.	+	.	gene_id "XLOC_001059"; transcript_id "TCONS_00001731"; exon_number "2"; gene_name "CEP70"; oId "CUFF.2085.9"; nearest_ref "ENSBTAT00000050229"; class_code "j"; tss_id "TSS1255";
1	Cufflinks	exon	131591146	131591270	.	+	.	gene_id "XLOC_001059"; transcript_id "TCONS_00001731"; exon_number "3"; gene_name "CEP70"; oId "CUFF.2085.9"; nearest_ref "ENSBTAT00000050229"; class_code "j"; tss_id "TSS1255";
1	Cufflinks	exon	131596123	131596213	.	+	.	gene_id "XLOC_001059"; transcript_id "TCONS_00001731"; exon_number "4"; gene_name "CEP70"; oId "CUFF.2085.9"; nearest_ref "ENSBTAT00000050229"; class_code "j"; tss_id "TSS1255";
1	Cufflinks	exon	131596335	131596458	.	+	.	gene_id "XLOC_001059"; transcript_id "TCONS_00001731"; exon_number "5"; gene_name "CEP70"; oId "CUFF.2085.9"; nearest_ref "ENSBTAT00000050229"; class_code "j"; tss_id "TSS1255";
1	Cufflinks	exon	131596777	131596957	.	+	.	gene_id "XLOC_001059"; transcript_id "TCONS_00001731"; exon_number "6"; gene_name "CEP70"; oId "CUFF.2085.9"; nearest_ref "ENSBTAT00000050229"; class_code "j"; tss_id "TSS1255";
1	Cufflinks	exon	131617772	131617941	.	+	.	gene_id "XLOC_001059"; transcript_id "TCONS_00001731"; exon_number "7"; gene_name "CEP70"; oId "CUFF.2085.9"; nearest_ref "ENSBTAT00000050229"; class_code "j"; tss_id "TSS1255";
1	Cufflinks	exon	131631558	131631642	.	+	.	gene_id "XLOC_001059"; transcript_id "TCONS_00001731"; exon_number "8"; gene_name "CEP70"; oId "CUFF.2085.9"; nearest_ref "ENSBTAT00000050229"; class_code "j"; tss_id "TSS1255";
1	Cufflinks	exon	131631739	131631827	.	+	.	gene_id "XLOC_001059"; transcript_id "TCONS_00001731"; exon_number "9"; gene_name "CEP70"; oId "CUFF.2085.9"; nearest_ref "ENSBTAT00000050229"; class_code "j"; tss_id "TSS1255";
1	Cufflinks	exon	131633369	131633443	.	+	.	gene_id "XLOC_001059"; transcript_id "TCONS_00001731"; exon_number "10"; gene_name "CEP70"; oId "CUFF.2085.9"; nearest_ref "ENSBTAT00000050229"; class_code "j"; tss_id "TSS1255";
1	Cufflinks	exon	131642692	131642797	.	+	.	gene_id "XLOC_001059"; transcript_id "TCONS_00001731"; exon_number "11"; gene_name "CEP70"; oId "CUFF.2085.9"; nearest_ref "ENSBTAT00000050229"; class_code "j"; tss_id "TSS1255";
1	Cufflinks	exon	131651738	131651908	.	+	.	gene_id "XLOC_001059"; transcript_id "TCONS_00001731"; exon_number "12"; gene_name "CEP70"; oId "CUFF.2085.9"; nearest_ref "ENSBTAT00000050229"; class_code "j"; tss_id "TSS1255";
1	Cufflinks	exon	131653843	131653989	.	+	.	gene_id "XLOC_001059"; transcript_id "TCONS_00001731"; exon_number "13"; gene_name "CEP70"; oId "CUFF.2085.9"; nearest_ref "ENSBTAT00000050229"; class_code "j"; tss_id "TSS1255";
1	Cufflinks	exon	131654153	131654321	.	+	.	gene_id "XLOC_001059"; transcript_id "TCONS_00001731"; exon_number "14"; gene_name "CEP70"; oId "CUFF.2085.9"; nearest_ref "ENSBTAT00000050229"; class_code "j"; tss_id "TSS1255";
1	Cufflinks	exon	131654675	131654789	.	+	.	gene_id "XLOC_001059"; transcript_id "TCONS_00001731"; exon_number "15"; gene_name "CEP70"; oId "CUFF.2085.9"; nearest_ref "ENSBTAT00000050229"; class_code "j"; tss_id "TSS1255";
1	Cufflinks	exon	131656063	131656142	.	+	.	gene_id "XLOC_001059"; transcript_id "TCONS_00001731"; exon_number "16"; gene_name "CEP70"; oId "CUFF.2085.9"; nearest_ref "ENSBTAT00000050229"; class_code "j"; tss_id "TSS1255";
1	Cufflinks	exon	131657992	131659228	.	+	.	gene_id "XLOC_001059"; transcript_id "TCONS_00001731"; exon_number "17"; gene_name "CEP70"; oId "CUFF.2085.9"; nearest_ref "ENSBTAT00000050229"; class_code "j"; tss_id "TSS1255";
1	Cufflinks	exon	131578657	131578687	.	+	.	gene_id "XLOC_001059"; transcript_id "TCONS_00001732"; exon_number "1"; oId "CUFF.2085.10"; class_code "u"; tss_id "TSS1255";
1	Cufflinks	exon	131580575	131580677	.	+	.	gene_id "XLOC_001059"; transcript_id "TCONS_00001732"; exon_number "2"; oId "CUFF.2085.10"; class_code "u"; tss_id "TSS1255";
1	Cufflinks	exon	131582562	131582790	.	+	.	gene_id "XLOC_001059"; transcript_id "TCONS_00001732"; exon_number "3"; oId "CUFF.2085.10"; class_code "u"; tss_id "TSS1255";
1	Cufflinks	exon	131578939	131579063	.	+	.	gene_id "XLOC_001059"; transcript_id "TCONS_00001733"; exon_number "1"; gene_name "CEP70"; oId "CUFF.2085.11"; nearest_ref "ENSBTAT00000050229"; class_code "j"; tss_id "TSS1256";
1	Cufflinks	exon	131580575	131580677	.	+	.	gene_id "XLOC_001059"; transcript_id "TCONS_00001733"; exon_number "2"; gene_name "CEP70"; oId "CUFF.2085.11"; nearest_ref "ENSBTAT00000050229"; class_code "j"; tss_id "TSS1256";
1	Cufflinks	exon	131591146	131591270	.	+	.	gene_id "XLOC_001059"; transcript_id "TCONS_00001733"; exon_number "3"; gene_name "CEP70"; oId "CUFF.2085.11"; nearest_ref "ENSBTAT00000050229"; class_code "j"; tss_id "TSS1256";
1	Cufflinks	exon	131596123	131596213	.	+	.	gene_id "XLOC_001059"; transcript_id "TCONS_00001733"; exon_number "4"; gene_name "CEP70"; oId "CUFF.2085.11"; nearest_ref "ENSBTAT00000050229"; class_code "j"; tss_id "TSS1256";
1	Cufflinks	exon	131596335	131596458	.	+	.	gene_id "XLOC_001059"; transcript_id "TCONS_00001733"; exon_number "5"; gene_name "CEP70"; oId "CUFF.2085.11"; nearest_ref "ENSBTAT00000050229"; class_code "j"; tss_id "TSS1256";
1	Cufflinks	exon	131596777	131596957	.	+	.	gene_id "XLOC_001059"; transcript_id "TCONS_00001733"; exon_number "6"; gene_name "CEP70"; oId "CUFF.2085.11"; nearest_ref "ENSBTAT00000050229"; class_code "j"; tss_id "TSS1256";
1	Cufflinks	exon	131617772	131617941	.	+	.	gene_id "XLOC_001059"; transcript_id "TCONS_00001733"; exon_number "7"; gene_name "CEP70"; oId "CUFF.2085.11"; nearest_ref "ENSBTAT00000050229"; class_code "j"; tss_id "TSS1256";
1	Cufflinks	exon	131620739	131620795	.	+	.	gene_id "XLOC_001059"; transcript_id "TCONS_00001733"; exon_number "8"; gene_name "CEP70"; oId "CUFF.2085.11"; nearest_ref "ENSBTAT00000050229"; class_code "j"; tss_id "TSS1256";
1	Cufflinks	exon	131631558	131631642	.	+	.	gene_id "XLOC_001059"; transcript_id "TCONS_00001733"; exon_number "9"; gene_name "CEP70"; oId "CUFF.2085.11"; nearest_ref "ENSBTAT00000050229"; class_code "j"; tss_id "TSS1256";
1	Cufflinks	exon	131631739	131631827	.	+	.	gene_id "XLOC_001059"; transcript_id "TCONS_00001733"; exon_number "10"; gene_name "CEP70"; oId "CUFF.2085.11"; nearest_ref "ENSBTAT00000050229"; class_code "j"; tss_id "TSS1256";
1	Cufflinks	exon	131633369	131633443	.	+	.	gene_id "XLOC_001059"; transcript_id "TCONS_00001733"; exon_number "11"; gene_name "CEP70"; oId "CUFF.2085.11"; nearest_ref "ENSBTAT00000050229"; class_code "j"; tss_id "TSS1256";
1	Cufflinks	exon	131642692	131642797	.	+	.	gene_id "XLOC_001059"; transcript_id "TCONS_00001733"; exon_number "12"; gene_name "CEP70"; oId "CUFF.2085.11"; nearest_ref "ENSBTAT00000050229"; class_code "j"; tss_id "TSS1256";
1	Cufflinks	exon	131651738	131651908	.	+	.	gene_id "XLOC_001059"; transcript_id "TCONS_00001733"; exon_number "13"; gene_name "CEP70"; oId "CUFF.2085.11"; nearest_ref "ENSBTAT00000050229"; class_code "j"; tss_id "TSS1256";
1	Cufflinks	exon	131653843	131653989	.	+	.	gene_id "XLOC_001059"; transcript_id "TCONS_00001733"; exon_number "14"; gene_name "CEP70"; oId "CUFF.2085.11"; nearest_ref "ENSBTAT00000050229"; class_code "j"; tss_id "TSS1256";
1	Cufflinks	exon	131654153	131654321	.	+	.	gene_id "XLOC_001059"; transcript_id "TCONS_00001733"; exon_number "15"; gene_name "CEP70"; oId "CUFF.2085.11"; nearest_ref "ENSBTAT00000050229"; class_code "j"; tss_id "TSS1256";
1	Cufflinks	exon	131654675	131654789	.	+	.	gene_id "XLOC_001059"; transcript_id "TCONS_00001733"; exon_number "16"; gene_name "CEP70"; oId "CUFF.2085.11"; nearest_ref "ENSBTAT00000050229"; class_code "j"; tss_id "TSS1256";
1	Cufflinks	exon	131656063	131656142	.	+	.	gene_id "XLOC_001059"; transcript_id "TCONS_00001733"; exon_number "17"; gene_name "CEP70"; oId "CUFF.2085.11"; nearest_ref "ENSBTAT00000050229"; class_code "j"; tss_id "TSS1256";
1	Cufflinks	exon	131657992	131659228	.	+	.	gene_id "XLOC_001059"; transcript_id "TCONS_00001733"; exon_number "18"; gene_name "CEP70"; oId "CUFF.2085.11"; nearest_ref "ENSBTAT00000050229"; class_code "j"; tss_id "TSS1256";
1	Cufflinks	exon	131588918	131588939	.	+	.	gene_id "XLOC_001059"; transcript_id "TCONS_00001734"; exon_number "1"; gene_name "CEP70"; oId "CUFF.2085.12"; nearest_ref "ENSBTAT00000050229"; class_code "j"; tss_id "TSS1257";
1	Cufflinks	exon	131591146	131591270	.	+	.	gene_id "XLOC_001059"; transcript_id "TCONS_00001734"; exon_number "2"; gene_name "CEP70"; oId "CUFF.2085.12"; nearest_ref "ENSBTAT00000050229"; class_code "j"; tss_id "TSS1257";
1	Cufflinks	exon	131596123	131596213	.	+	.	gene_id "XLOC_001059"; transcript_id "TCONS_00001734"; exon_number "3"; gene_name "CEP70"; oId "CUFF.2085.12"; nearest_ref "ENSBTAT00000050229"; class_code "j"; tss_id "TSS1257";
1	Cufflinks	exon	131596335	131596458	.	+	.	gene_id "XLOC_001059"; transcript_id "TCONS_00001734"; exon_number "4"; gene_name "CEP70"; oId "CUFF.2085.12"; nearest_ref "ENSBTAT00000050229"; class_code "j"; tss_id "TSS1257";
1	Cufflinks	exon	131596777	131596957	.	+	.	gene_id "XLOC_001059"; transcript_id "TCONS_00001734"; exon_number "5"; gene_name "CEP70"; oId "CUFF.2085.12"; nearest_ref "ENSBTAT00000050229"; class_code "j"; tss_id "TSS1257";
1	Cufflinks	exon	131617772	131617941	.	+	.	gene_id "XLOC_001059"; transcript_id "TCONS_00001734"; exon_number "6"; gene_name "CEP70"; oId "CUFF.2085.12"; nearest_ref "ENSBTAT00000050229"; class_code "j"; tss_id "TSS1257";
1	Cufflinks	exon	131620739	131620795	.	+	.	gene_id "XLOC_001059"; transcript_id "TCONS_00001734"; exon_number "7"; gene_name "CEP70"; oId "CUFF.2085.12"; nearest_ref "ENSBTAT00000050229"; class_code "j"; tss_id "TSS1257";
1	Cufflinks	exon	131631558	131631642	.	+	.	gene_id "XLOC_001059"; transcript_id "TCONS_00001734"; exon_number "8"; gene_name "CEP70"; oId "CUFF.2085.12"; nearest_ref "ENSBTAT00000050229"; class_code "j"; tss_id "TSS1257";
1	Cufflinks	exon	131631739	131631827	.	+	.	gene_id "XLOC_001059"; transcript_id "TCONS_00001734"; exon_number "9"; gene_name "CEP70"; oId "CUFF.2085.12"; nearest_ref "ENSBTAT00000050229"; class_code "j"; tss_id "TSS1257";
1	Cufflinks	exon	131633369	131633443	.	+	.	gene_id "XLOC_001059"; transcript_id "TCONS_00001734"; exon_number "10"; gene_name "CEP70"; oId "CUFF.2085.12"; nearest_ref "ENSBTAT00000050229"; class_code "j"; tss_id "TSS1257";
1	Cufflinks	exon	131642692	131642797	.	+	.	gene_id "XLOC_001059"; transcript_id "TCONS_00001734"; exon_number "11"; gene_name "CEP70"; oId "CUFF.2085.12"; nearest_ref "ENSBTAT00000050229"; class_code "j"; tss_id "TSS1257";
1	Cufflinks	exon	131651738	131651908	.	+	.	gene_id "XLOC_001059"; transcript_id "TCONS_00001734"; exon_number "12"; gene_name "CEP70"; oId "CUFF.2085.12"; nearest_ref "ENSBTAT00000050229"; class_code "j"; tss_id "TSS1257";
1	Cufflinks	exon	131653843	131653989	.	+	.	gene_id "XLOC_001059"; transcript_id "TCONS_00001734"; exon_number "13"; gene_name "CEP70"; oId "CUFF.2085.12"; nearest_ref "ENSBTAT00000050229"; class_code "j"; tss_id "TSS1257";
1	Cufflinks	exon	131654153	131654321	.	+	.	gene_id "XLOC_001059"; transcript_id "TCONS_00001734"; exon_number "14"; gene_name "CEP70"; oId "CUFF.2085.12"; nearest_ref "ENSBTAT00000050229"; class_code "j"; tss_id "TSS1257";
1	Cufflinks	exon	131654675	131654789	.	+	.	gene_id "XLOC_001059"; transcript_id "TCONS_00001734"; exon_number "15"; gene_name "CEP70"; oId "CUFF.2085.12"; nearest_ref "ENSBTAT00000050229"; class_code "j"; tss_id "TSS1257";
1	Cufflinks	exon	131656063	131656142	.	+	.	gene_id "XLOC_001059"; transcript_id "TCONS_00001734"; exon_number "16"; gene_name "CEP70"; oId "CUFF.2085.12"; nearest_ref "ENSBTAT00000050229"; class_code "j"; tss_id "TSS1257";
1	Cufflinks	exon	131657992	131659228	.	+	.	gene_id "XLOC_001059"; transcript_id "TCONS_00001734"; exon_number "17"; gene_name "CEP70"; oId "CUFF.2085.12"; nearest_ref "ENSBTAT00000050229"; class_code "j"; tss_id "TSS1257";
1	Cufflinks	exon	131590399	131590409	.	+	.	gene_id "XLOC_001059"; transcript_id "TCONS_00001735"; exon_number "1"; gene_name "CEP70"; oId "ENSBTAT00000050229"; nearest_ref "ENSBTAT00000050229"; class_code "="; tss_id "TSS1258"; p_id "P344";
1	Cufflinks	exon	131591146	131591246	.	+	.	gene_id "XLOC_001059"; transcript_id "TCONS_00001735"; exon_number "2"; gene_name "CEP70"; oId "ENSBTAT00000050229"; nearest_ref "ENSBTAT00000050229"; class_code "="; tss_id "TSS1258"; p_id "P344";
1	Cufflinks	exon	131593833	131593855	.	+	.	gene_id "XLOC_001059"; transcript_id "TCONS_00001735"; exon_number "3"; gene_name "CEP70"; oId "ENSBTAT00000050229"; nearest_ref "ENSBTAT00000050229"; class_code "="; tss_id "TSS1258"; p_id "P344";
1	Cufflinks	exon	131596123	131596213	.	+	.	gene_id "XLOC_001059"; transcript_id "TCONS_00001735"; exon_number "4"; gene_name "CEP70"; oId "ENSBTAT00000050229"; nearest_ref "ENSBTAT00000050229"; class_code "="; tss_id "TSS1258"; p_id "P344";
1	Cufflinks	exon	131596326	131596458	.	+	.	gene_id "XLOC_001059"; transcript_id "TCONS_00001735"; exon_number "5"; gene_name "CEP70"; oId "ENSBTAT00000050229"; nearest_ref "ENSBTAT00000050229"; class_code "="; tss_id "TSS1258"; p_id "P344";
1	Cufflinks	exon	131596777	131596957	.	+	.	gene_id "XLOC_001059"; transcript_id "TCONS_00001735"; exon_number "6"; gene_name "CEP70"; oId "ENSBTAT00000050229"; nearest_ref "ENSBTAT00000050229"; class_code "="; tss_id "TSS1258"; p_id "P344";
1	Cufflinks	exon	131617772	131617941	.	+	.	gene_id "XLOC_001059"; transcript_id "TCONS_00001735"; exon_number "7"; gene_name "CEP70"; oId "ENSBTAT00000050229"; nearest_ref "ENSBTAT00000050229"; class_code "="; tss_id "TSS1258"; p_id "P344";
1	Cufflinks	exon	131620739	131620795	.	+	.	gene_id "XLOC_001059"; transcript_id "TCONS_00001735"; exon_number "8"; gene_name "CEP70"; oId "ENSBTAT00000050229"; nearest_ref "ENSBTAT00000050229"; class_code "="; tss_id "TSS1258"; p_id "P344";
1	Cufflinks	exon	131631558	131631642	.	+	.	gene_id "XLOC_001059"; transcript_id "TCONS_00001735"; exon_number "9"; gene_name "CEP70"; oId "ENSBTAT00000050229"; nearest_ref "ENSBTAT00000050229"; class_code "="; tss_id "TSS1258"; p_id "P344";
1	Cufflinks	exon	131631739	131631827	.	+	.	gene_id "XLOC_001059"; transcript_id "TCONS_00001735"; exon_number "10"; gene_name "CEP70"; oId "ENSBTAT00000050229"; nearest_ref "ENSBTAT00000050229"; class_code "="; tss_id "TSS1258"; p_id "P344";
1	Cufflinks	exon	131633369	131633443	.	+	.	gene_id "XLOC_001059"; transcript_id "TCONS_00001735"; exon_number "11"; gene_name "CEP70"; oId "ENSBTAT00000050229"; nearest_ref "ENSBTAT00000050229"; class_code "="; tss_id "TSS1258"; p_id "P344";
1	Cufflinks	exon	131642692	131642797	.	+	.	gene_id "XLOC_001059"; transcript_id "TCONS_00001735"; exon_number "12"; gene_name "CEP70"; oId "ENSBTAT00000050229"; nearest_ref "ENSBTAT00000050229"; class_code "="; tss_id "TSS1258"; p_id "P344";
1	Cufflinks	exon	131651738	131651908	.	+	.	gene_id "XLOC_001059"; transcript_id "TCONS_00001735"; exon_number "13"; gene_name "CEP70"; oId "ENSBTAT00000050229"; nearest_ref "ENSBTAT00000050229"; class_code "="; tss_id "TSS1258"; p_id "P344";
1	Cufflinks	exon	131653843	131653989	.	+	.	gene_id "XLOC_001059"; transcript_id "TCONS_00001735"; exon_number "14"; gene_name "CEP70"; oId "ENSBTAT00000050229"; nearest_ref "ENSBTAT00000050229"; class_code "="; tss_id "TSS1258"; p_id "P344";
1	Cufflinks	exon	131654153	131654321	.	+	.	gene_id "XLOC_001059"; transcript_id "TCONS_00001735"; exon_number "15"; gene_name "CEP70"; oId "ENSBTAT00000050229"; nearest_ref "ENSBTAT00000050229"; class_code "="; tss_id "TSS1258"; p_id "P344";
1	Cufflinks	exon	131654675	131654789	.	+	.	gene_id "XLOC_001059"; transcript_id "TCONS_00001735"; exon_number "16"; gene_name "CEP70"; oId "ENSBTAT00000050229"; nearest_ref "ENSBTAT00000050229"; class_code "="; tss_id "TSS1258"; p_id "P344";
1	Cufflinks	exon	131656063	131656142	.	+	.	gene_id "XLOC_001059"; transcript_id "TCONS_00001735"; exon_number "17"; gene_name "CEP70"; oId "ENSBTAT00000050229"; nearest_ref "ENSBTAT00000050229"; class_code "="; tss_id "TSS1258"; p_id "P344";
1	Cufflinks	exon	131657992	131658628	.	+	.	gene_id "XLOC_001059"; transcript_id "TCONS_00001735"; exon_number "18"; gene_name "CEP70"; oId "ENSBTAT00000050229"; nearest_ref "ENSBTAT00000050229"; class_code "="; tss_id "TSS1258"; p_id "P344";
1	Cufflinks	exon	131590399	131590409	.	+	.	gene_id "XLOC_001059"; transcript_id "TCONS_00001736"; exon_number "1"; gene_name "CEP70"; oId "CUFF.2085.14"; nearest_ref "ENSBTAT00000050229"; class_code "j"; tss_id "TSS1258";
1	Cufflinks	exon	131591146	131591270	.	+	.	gene_id "XLOC_001059"; transcript_id "TCONS_00001736"; exon_number "2"; gene_name "CEP70"; oId "CUFF.2085.14"; nearest_ref "ENSBTAT00000050229"; class_code "j"; tss_id "TSS1258";
1	Cufflinks	exon	131596123	131596213	.	+	.	gene_id "XLOC_001059"; transcript_id "TCONS_00001736"; exon_number "3"; gene_name "CEP70"; oId "CUFF.2085.14"; nearest_ref "ENSBTAT00000050229"; class_code "j"; tss_id "TSS1258";
1	Cufflinks	exon	131596335	131596458	.	+	.	gene_id "XLOC_001059"; transcript_id "TCONS_00001736"; exon_number "4"; gene_name "CEP70"; oId "CUFF.2085.14"; nearest_ref "ENSBTAT00000050229"; class_code "j"; tss_id "TSS1258";
1	Cufflinks	exon	131596777	131596957	.	+	.	gene_id "XLOC_001059"; transcript_id "TCONS_00001736"; exon_number "5"; gene_name "CEP70"; oId "CUFF.2085.14"; nearest_ref "ENSBTAT00000050229"; class_code "j"; tss_id "TSS1258";
1	Cufflinks	exon	131617772	131617941	.	+	.	gene_id "XLOC_001059"; transcript_id "TCONS_00001736"; exon_number "6"; gene_name "CEP70"; oId "CUFF.2085.14"; nearest_ref "ENSBTAT00000050229"; class_code "j"; tss_id "TSS1258";
1	Cufflinks	exon	131620739	131620795	.	+	.	gene_id "XLOC_001059"; transcript_id "TCONS_00001736"; exon_number "7"; gene_name "CEP70"; oId "CUFF.2085.14"; nearest_ref "ENSBTAT00000050229"; class_code "j"; tss_id "TSS1258";
1	Cufflinks	exon	131631558	131631642	.	+	.	gene_id "XLOC_001059"; transcript_id "TCONS_00001736"; exon_number "8"; gene_name "CEP70"; oId "CUFF.2085.14"; nearest_ref "ENSBTAT00000050229"; class_code "j"; tss_id "TSS1258";
1	Cufflinks	exon	131631739	131631827	.	+	.	gene_id "XLOC_001059"; transcript_id "TCONS_00001736"; exon_number "9"; gene_name "CEP70"; oId "CUFF.2085.14"; nearest_ref "ENSBTAT00000050229"; class_code "j"; tss_id "TSS1258";
1	Cufflinks	exon	131633369	131633443	.	+	.	gene_id "XLOC_001059"; transcript_id "TCONS_00001736"; exon_number "10"; gene_name "CEP70"; oId "CUFF.2085.14"; nearest_ref "ENSBTAT00000050229"; class_code "j"; tss_id "TSS1258";
1	Cufflinks	exon	131642692	131642797	.	+	.	gene_id "XLOC_001059"; transcript_id "TCONS_00001736"; exon_number "11"; gene_name "CEP70"; oId "CUFF.2085.14"; nearest_ref "ENSBTAT00000050229"; class_code "j"; tss_id "TSS1258";
1	Cufflinks	exon	131651738	131651908	.	+	.	gene_id "XLOC_001059"; transcript_id "TCONS_00001736"; exon_number "12"; gene_name "CEP70"; oId "CUFF.2085.14"; nearest_ref "ENSBTAT00000050229"; class_code "j"; tss_id "TSS1258";
1	Cufflinks	exon	131653843	131653989	.	+	.	gene_id "XLOC_001059"; transcript_id "TCONS_00001736"; exon_number "13"; gene_name "CEP70"; oId "CUFF.2085.14"; nearest_ref "ENSBTAT00000050229"; class_code "j"; tss_id "TSS1258";
1	Cufflinks	exon	131654153	131654321	.	+	.	gene_id "XLOC_001059"; transcript_id "TCONS_00001736"; exon_number "14"; gene_name "CEP70"; oId "CUFF.2085.14"; nearest_ref "ENSBTAT00000050229"; class_code "j"; tss_id "TSS1258";
1	Cufflinks	exon	131654675	131654789	.	+	.	gene_id "XLOC_001059"; transcript_id "TCONS_00001736"; exon_number "15"; gene_name "CEP70"; oId "CUFF.2085.14"; nearest_ref "ENSBTAT00000050229"; class_code "j"; tss_id "TSS1258";
1	Cufflinks	exon	131656063	131656142	.	+	.	gene_id "XLOC_001059"; transcript_id "TCONS_00001736"; exon_number "16"; gene_name "CEP70"; oId "CUFF.2085.14"; nearest_ref "ENSBTAT00000050229"; class_code "j"; tss_id "TSS1258";
1	Cufflinks	exon	131657992	131659228	.	+	.	gene_id "XLOC_001059"; transcript_id "TCONS_00001736"; exon_number "17"; gene_name "CEP70"; oId "CUFF.2085.14"; nearest_ref "ENSBTAT00000050229"; class_code "j"; tss_id "TSS1258";
1	Cufflinks	exon	131628878	131628917	.	+	.	gene_id "XLOC_001059"; transcript_id "TCONS_00001737"; exon_number "1"; gene_name "CEP70"; oId "CUFF.2085.15"; nearest_ref "ENSBTAT00000050229"; class_code "j"; tss_id "TSS1259";
1	Cufflinks	exon	131631558	131631642	.	+	.	gene_id "XLOC_001059"; transcript_id "TCONS_00001737"; exon_number "2"; gene_name "CEP70"; oId "CUFF.2085.15"; nearest_ref "ENSBTAT00000050229"; class_code "j"; tss_id "TSS1259";
1	Cufflinks	exon	131631739	131631827	.	+	.	gene_id "XLOC_001059"; transcript_id "TCONS_00001737"; exon_number "3"; gene_name "CEP70"; oId "CUFF.2085.15"; nearest_ref "ENSBTAT00000050229"; class_code "j"; tss_id "TSS1259";
1	Cufflinks	exon	131633369	131633443	.	+	.	gene_id "XLOC_001059"; transcript_id "TCONS_00001737"; exon_number "4"; gene_name "CEP70"; oId "CUFF.2085.15"; nearest_ref "ENSBTAT00000050229"; class_code "j"; tss_id "TSS1259";
1	Cufflinks	exon	131642692	131642797	.	+	.	gene_id "XLOC_001059"; transcript_id "TCONS_00001737"; exon_number "5"; gene_name "CEP70"; oId "CUFF.2085.15"; nearest_ref "ENSBTAT00000050229"; class_code "j"; tss_id "TSS1259";
1	Cufflinks	exon	131651738	131651908	.	+	.	gene_id "XLOC_001059"; transcript_id "TCONS_00001737"; exon_number "6"; gene_name "CEP70"; oId "CUFF.2085.15"; nearest_ref "ENSBTAT00000050229"; class_code "j"; tss_id "TSS1259";
1	Cufflinks	exon	131653843	131653989	.	+	.	gene_id "XLOC_001059"; transcript_id "TCONS_00001737"; exon_number "7"; gene_name "CEP70"; oId "CUFF.2085.15"; nearest_ref "ENSBTAT00000050229"; class_code "j"; tss_id "TSS1259";
1	Cufflinks	exon	131654153	131654321	.	+	.	gene_id "XLOC_001059"; transcript_id "TCONS_00001737"; exon_number "8"; gene_name "CEP70"; oId "CUFF.2085.15"; nearest_ref "ENSBTAT00000050229"; class_code "j"; tss_id "TSS1259";
1	Cufflinks	exon	131654675	131654789	.	+	.	gene_id "XLOC_001059"; transcript_id "TCONS_00001737"; exon_number "9"; gene_name "CEP70"; oId "CUFF.2085.15"; nearest_ref "ENSBTAT00000050229"; class_code "j"; tss_id "TSS1259";
1	Cufflinks	exon	131656063	131656142	.	+	.	gene_id "XLOC_001059"; transcript_id "TCONS_00001737"; exon_number "10"; gene_name "CEP70"; oId "CUFF.2085.15"; nearest_ref "ENSBTAT00000050229"; class_code "j"; tss_id "TSS1259";
1	Cufflinks	exon	131657992	131659228	.	+	.	gene_id "XLOC_001059"; transcript_id "TCONS_00001737"; exon_number "11"; gene_name "CEP70"; oId "CUFF.2085.15"; nearest_ref "ENSBTAT00000050229"; class_code "j"; tss_id "TSS1259";
1	Cufflinks	exon	131575553	131576459	.	+	.	gene_id "XLOC_001062"; transcript_id "TCONS_00001726"; exon_number "1"; oId "CUFF.2088.1"; class_code "u"; tss_id "TSS1262";
1	Cufflinks	exon	131663295	131664855	.	+	.	gene_id "XLOC_001065"; transcript_id "TCONS_00001740"; exon_number "1"; oId "CUFF.2034.1"; class_code "u"; tss_id "TSS1265";
1	Cufflinks	exon	138316236	138317044	.	+	.	gene_id "XLOC_001101"; transcript_id "TCONS_00001814"; exon_number "1"; oId "CUFF.2149.1"; class_code "u"; tss_id "TSS1315";
1	Cufflinks	exon	139947256	139948471	.	+	.	gene_id "XLOC_001110"; transcript_id "TCONS_00001823"; exon_number "1"; oId "CUFF.2165.1"; class_code "u"; tss_id "TSS1324";
1	Cufflinks	exon	139974670	139976404	.	+	.	gene_id "XLOC_001121"; transcript_id "TCONS_00001834"; exon_number "1"; oId "CUFF.2175.1"; class_code "u"; tss_id "TSS1335";
1	Cufflinks	exon	140361694	140362381	.	+	.	gene_id "XLOC_001132"; transcript_id "TCONS_00001847"; exon_number "1"; oId "CUFF.2181.1"; class_code "u"; tss_id "TSS1347";
1	Cufflinks	exon	140914020	140916501	.	+	.	gene_id "XLOC_001135"; transcript_id "TCONS_00001850"; exon_number "1"; oId "CUFF.2196.1"; class_code "u"; tss_id "TSS1350";
1	Cufflinks	exon	142220342	142221735	.	+	.	gene_id "XLOC_001153"; transcript_id "TCONS_00001876"; exon_number "1"; oId "CUFF.2214.1"; class_code "u"; tss_id "TSS1371";
1	Cufflinks	exon	143207155	143208740	.	+	.	gene_id "XLOC_001160"; transcript_id "TCONS_00001897"; exon_number "1"; oId "CUFF.2221.1"; class_code "u"; tss_id "TSS1385";
1	Cufflinks	exon	144140146	144140366	.	+	.	gene_id "XLOC_001176"; transcript_id "TCONS_00001915"; exon_number "1"; oId "CUFF.2266.1"; class_code "u"; tss_id "TSS1401";
1	Cufflinks	exon	144140568	144141807	.	+	.	gene_id "XLOC_001177"; transcript_id "TCONS_00001916"; exon_number "1"; oId "CUFF.2268.1"; class_code "u"; tss_id "TSS1402";
1	Cufflinks	exon	144177912	144178309	.	+	.	gene_id "XLOC_001184"; transcript_id "TCONS_00001923"; exon_number "1"; gene_name "TFF2"; oId "CUFF.2278.1"; nearest_ref "ENSBTAT00000043564"; class_code "x"; tss_id "TSS1409";
1	Cufflinks	exon	144742934	144743872	.	+	.	gene_id "XLOC_001197"; transcript_id "TCONS_00001955"; exon_number "1"; oId "CUFF.2297.1"; class_code "u"; tss_id "TSS1429";
1	Cufflinks	exon	145184603	145185093	.	+	.	gene_id "XLOC_001207"; transcript_id "TCONS_00001970"; exon_number "1"; oId "CUFF.2316.1"; class_code "u"; tss_id "TSS1442";
1	Cufflinks	exon	145191768	145191878	.	+	.	gene_id "XLOC_001207"; transcript_id "TCONS_00001970"; exon_number "2"; oId "CUFF.2316.1"; class_code "u"; tss_id "TSS1442";
1	Cufflinks	exon	145193011	145193226	.	+	.	gene_id "XLOC_001207"; transcript_id "TCONS_00001970"; exon_number "3"; oId "CUFF.2316.1"; class_code "u"; tss_id "TSS1442";
1	Cufflinks	exon	145193727	145195839	.	+	.	gene_id "XLOC_001207"; transcript_id "TCONS_00001970"; exon_number "4"; oId "CUFF.2316.1"; class_code "u"; tss_id "TSS1442";
1	Cufflinks	exon	145184605	145185093	.	+	.	gene_id "XLOC_001207"; transcript_id "TCONS_00001971"; exon_number "1"; oId "CUFF.2316.2"; class_code "u"; tss_id "TSS1442";
1	Cufflinks	exon	145191768	145191878	.	+	.	gene_id "XLOC_001207"; transcript_id "TCONS_00001971"; exon_number "2"; oId "CUFF.2316.2"; class_code "u"; tss_id "TSS1442";
1	Cufflinks	exon	145193011	145193226	.	+	.	gene_id "XLOC_001207"; transcript_id "TCONS_00001971"; exon_number "3"; oId "CUFF.2316.2"; class_code "u"; tss_id "TSS1442";
1	Cufflinks	exon	145199063	145202986	.	+	.	gene_id "XLOC_001207"; transcript_id "TCONS_00001971"; exon_number "4"; oId "CUFF.2316.2"; class_code "u"; tss_id "TSS1442";
1	Cufflinks	exon	145189231	145189502	.	+	.	gene_id "XLOC_001207"; transcript_id "TCONS_00001972"; exon_number "1"; oId "CUFF.2316.3"; class_code "u"; tss_id "TSS1443";
1	Cufflinks	exon	145191768	145191878	.	+	.	gene_id "XLOC_001207"; transcript_id "TCONS_00001972"; exon_number "2"; oId "CUFF.2316.3"; class_code "u"; tss_id "TSS1443";
1	Cufflinks	exon	145193011	145193226	.	+	.	gene_id "XLOC_001207"; transcript_id "TCONS_00001972"; exon_number "3"; oId "CUFF.2316.3"; class_code "u"; tss_id "TSS1443";
1	Cufflinks	exon	145193727	145195839	.	+	.	gene_id "XLOC_001207"; transcript_id "TCONS_00001972"; exon_number "4"; oId "CUFF.2316.3"; class_code "u"; tss_id "TSS1443";
1	Cufflinks	exon	145189310	145189502	.	+	.	gene_id "XLOC_001207"; transcript_id "TCONS_00001973"; exon_number "1"; oId "CUFF.2316.4"; class_code "u"; tss_id "TSS1443";
1	Cufflinks	exon	145191768	145191878	.	+	.	gene_id "XLOC_001207"; transcript_id "TCONS_00001973"; exon_number "2"; oId "CUFF.2316.4"; class_code "u"; tss_id "TSS1443";
1	Cufflinks	exon	145193011	145193226	.	+	.	gene_id "XLOC_001207"; transcript_id "TCONS_00001973"; exon_number "3"; oId "CUFF.2316.4"; class_code "u"; tss_id "TSS1443";
1	Cufflinks	exon	145199063	145202986	.	+	.	gene_id "XLOC_001207"; transcript_id "TCONS_00001973"; exon_number "4"; oId "CUFF.2316.4"; class_code "u"; tss_id "TSS1443";
1	Cufflinks	exon	145189362	145189502	.	+	.	gene_id "XLOC_001207"; transcript_id "TCONS_00001974"; exon_number "1"; oId "CUFF.2316.5"; class_code "u"; tss_id "TSS1444";
1	Cufflinks	exon	145191768	145192021	.	+	.	gene_id "XLOC_001207"; transcript_id "TCONS_00001974"; exon_number "2"; oId "CUFF.2316.5"; class_code "u"; tss_id "TSS1444";
1	Cufflinks	exon	145193011	145193226	.	+	.	gene_id "XLOC_001207"; transcript_id "TCONS_00001974"; exon_number "3"; oId "CUFF.2316.5"; class_code "u"; tss_id "TSS1444";
1	Cufflinks	exon	145199063	145202986	.	+	.	gene_id "XLOC_001207"; transcript_id "TCONS_00001974"; exon_number "4"; oId "CUFF.2316.5"; class_code "u"; tss_id "TSS1444";
1	Cufflinks	exon	145203689	145204876	.	+	.	gene_id "XLOC_001208"; transcript_id "TCONS_00001975"; exon_number "1"; oId "CUFF.2314.1"; class_code "u"; tss_id "TSS1445";
1	Cufflinks	exon	145823696	145824547	.	+	.	gene_id "XLOC_001214"; transcript_id "TCONS_00001991"; exon_number "1"; oId "CUFF.2326.1"; class_code "u"; tss_id "TSS1454";
1	Cufflinks	exon	145825021	145826164	.	+	.	gene_id "XLOC_001215"; transcript_id "TCONS_00001992"; exon_number "1"; oId "CUFF.2327.1"; class_code "u"; tss_id "TSS1455";
1	Cufflinks	exon	145826611	145828067	.	+	.	gene_id "XLOC_001216"; transcript_id "TCONS_00001993"; exon_number "1"; oId "CUFF.2329.1"; class_code "u"; tss_id "TSS1456";
1	Cufflinks	exon	145828594	145829057	.	+	.	gene_id "XLOC_001217"; transcript_id "TCONS_00001994"; exon_number "1"; oId "CUFF.2328.1"; class_code "u"; tss_id "TSS1457";
1	Cufflinks	exon	146871684	146872865	.	+	.	gene_id "XLOC_001233"; transcript_id "TCONS_00002050"; exon_number "1"; oId "CUFF.2372.1"; class_code "u"; tss_id "TSS1488";
1	Cufflinks	exon	153136318	153136421	.	+	.	gene_id "XLOC_001309"; transcript_id "TCONS_00002221"; exon_number "1"; oId "CUFF.2542.1"; class_code "u"; tss_id "TSS1596";
1	Cufflinks	exon	153138718	153139450	.	+	.	gene_id "XLOC_001309"; transcript_id "TCONS_00002221"; exon_number "2"; oId "CUFF.2542.1"; class_code "u"; tss_id "TSS1596";
1	Cufflinks	exon	153200385	153201285	.	+	.	gene_id "XLOC_001310"; transcript_id "TCONS_00002222"; exon_number "1"; oId "CUFF.2550.1"; class_code "u"; tss_id "TSS1597";
1	Cufflinks	exon	153971348	153971603	.	+	.	gene_id "XLOC_001314"; transcript_id "TCONS_00002229"; exon_number "1"; gene_name "CAPN7"; oId "CUFF.2611.1"; nearest_ref "ENSBTAT00000008495"; class_code "j"; tss_id "TSS1602";
1	Cufflinks	exon	153973774	153973882	.	+	.	gene_id "XLOC_001314"; transcript_id "TCONS_00002229"; exon_number "2"; gene_name "CAPN7"; oId "CUFF.2611.1"; nearest_ref "ENSBTAT00000008495"; class_code "j"; tss_id "TSS1602";
1	Cufflinks	exon	153982086	153982243	.	+	.	gene_id "XLOC_001314"; transcript_id "TCONS_00002229"; exon_number "3"; gene_name "CAPN7"; oId "CUFF.2611.1"; nearest_ref "ENSBTAT00000008495"; class_code "j"; tss_id "TSS1602";
1	Cufflinks	exon	153983798	153983865	.	+	.	gene_id "XLOC_001314"; transcript_id "TCONS_00002229"; exon_number "4"; gene_name "CAPN7"; oId "CUFF.2611.1"; nearest_ref "ENSBTAT00000008495"; class_code "j"; tss_id "TSS1602";
1	Cufflinks	exon	153987125	153987325	.	+	.	gene_id "XLOC_001314"; transcript_id "TCONS_00002229"; exon_number "5"; gene_name "CAPN7"; oId "CUFF.2611.1"; nearest_ref "ENSBTAT00000008495"; class_code "j"; tss_id "TSS1602";
1	Cufflinks	exon	153989095	153989181	.	+	.	gene_id "XLOC_001314"; transcript_id "TCONS_00002229"; exon_number "6"; gene_name "CAPN7"; oId "CUFF.2611.1"; nearest_ref "ENSBTAT00000008495"; class_code "j"; tss_id "TSS1602";
1	Cufflinks	exon	153993665	153993791	.	+	.	gene_id "XLOC_001314"; transcript_id "TCONS_00002229"; exon_number "7"; gene_name "CAPN7"; oId "CUFF.2611.1"; nearest_ref "ENSBTAT00000008495"; class_code "j"; tss_id "TSS1602";
1	Cufflinks	exon	153994572	153994657	.	+	.	gene_id "XLOC_001314"; transcript_id "TCONS_00002229"; exon_number "8"; gene_name "CAPN7"; oId "CUFF.2611.1"; nearest_ref "ENSBTAT00000008495"; class_code "j"; tss_id "TSS1602";
1	Cufflinks	exon	153995894	153995987	.	+	.	gene_id "XLOC_001314"; transcript_id "TCONS_00002229"; exon_number "9"; gene_name "CAPN7"; oId "CUFF.2611.1"; nearest_ref "ENSBTAT00000008495"; class_code "j"; tss_id "TSS1602";
1	Cufflinks	exon	153997681	153997827	.	+	.	gene_id "XLOC_001314"; transcript_id "TCONS_00002229"; exon_number "10"; gene_name "CAPN7"; oId "CUFF.2611.1"; nearest_ref "ENSBTAT00000008495"; class_code "j"; tss_id "TSS1602";
1	Cufflinks	exon	153999139	153999245	.	+	.	gene_id "XLOC_001314"; transcript_id "TCONS_00002229"; exon_number "11"; gene_name "CAPN7"; oId "CUFF.2611.1"; nearest_ref "ENSBTAT00000008495"; class_code "j"; tss_id "TSS1602";
1	Cufflinks	exon	153999974	154000094	.	+	.	gene_id "XLOC_001314"; transcript_id "TCONS_00002229"; exon_number "12"; gene_name "CAPN7"; oId "CUFF.2611.1"; nearest_ref "ENSBTAT00000008495"; class_code "j"; tss_id "TSS1602";
1	Cufflinks	exon	154011712	154011856	.	+	.	gene_id "XLOC_001314"; transcript_id "TCONS_00002229"; exon_number "13"; gene_name "CAPN7"; oId "CUFF.2611.1"; nearest_ref "ENSBTAT00000008495"; class_code "j"; tss_id "TSS1602";
1	Cufflinks	exon	154011972	154012071	.	+	.	gene_id "XLOC_001314"; transcript_id "TCONS_00002229"; exon_number "14"; gene_name "CAPN7"; oId "CUFF.2611.1"; nearest_ref "ENSBTAT00000008495"; class_code "j"; tss_id "TSS1602";
1	Cufflinks	exon	154012690	154012825	.	+	.	gene_id "XLOC_001314"; transcript_id "TCONS_00002229"; exon_number "15"; gene_name "CAPN7"; oId "CUFF.2611.1"; nearest_ref "ENSBTAT00000008495"; class_code "j"; tss_id "TSS1602";
1	Cufflinks	exon	154013416	154013491	.	+	.	gene_id "XLOC_001314"; transcript_id "TCONS_00002229"; exon_number "16"; gene_name "CAPN7"; oId "CUFF.2611.1"; nearest_ref "ENSBTAT00000008495"; class_code "j"; tss_id "TSS1602";
1	Cufflinks	exon	154015071	154016604	.	+	.	gene_id "XLOC_001314"; transcript_id "TCONS_00002229"; exon_number "17"; gene_name "CAPN7"; oId "CUFF.2611.1"; nearest_ref "ENSBTAT00000008495"; class_code "j"; tss_id "TSS1602";
1	Cufflinks	exon	154017425	154017487	.	+	.	gene_id "XLOC_001314"; transcript_id "TCONS_00002229"; exon_number "18"; gene_name "CAPN7"; oId "CUFF.2611.1"; nearest_ref "ENSBTAT00000008495"; class_code "j"; tss_id "TSS1602";
1	Cufflinks	exon	154018028	154018158	.	+	.	gene_id "XLOC_001314"; transcript_id "TCONS_00002229"; exon_number "19"; gene_name "CAPN7"; oId "CUFF.2611.1"; nearest_ref "ENSBTAT00000008495"; class_code "j"; tss_id "TSS1602";
1	Cufflinks	exon	154021085	154021177	.	+	.	gene_id "XLOC_001314"; transcript_id "TCONS_00002229"; exon_number "20"; gene_name "CAPN7"; oId "CUFF.2611.1"; nearest_ref "ENSBTAT00000008495"; class_code "j"; tss_id "TSS1602";
1	Cufflinks	exon	154021271	154022508	.	+	.	gene_id "XLOC_001314"; transcript_id "TCONS_00002229"; exon_number "21"; gene_name "CAPN7"; oId "CUFF.2611.1"; nearest_ref "ENSBTAT00000008495"; class_code "j"; tss_id "TSS1602";
1	Cufflinks	exon	153971379	153971603	.	+	.	gene_id "XLOC_001314"; transcript_id "TCONS_00002230"; exon_number "1"; gene_name "CAPN7"; oId "CUFF.2611.2"; nearest_ref "ENSBTAT00000008495"; class_code "j"; tss_id "TSS1602";
1	Cufflinks	exon	153973774	153973882	.	+	.	gene_id "XLOC_001314"; transcript_id "TCONS_00002230"; exon_number "2"; gene_name "CAPN7"; oId "CUFF.2611.2"; nearest_ref "ENSBTAT00000008495"; class_code "j"; tss_id "TSS1602";
1	Cufflinks	exon	153982086	153982243	.	+	.	gene_id "XLOC_001314"; transcript_id "TCONS_00002230"; exon_number "3"; gene_name "CAPN7"; oId "CUFF.2611.2"; nearest_ref "ENSBTAT00000008495"; class_code "j"; tss_id "TSS1602";
1	Cufflinks	exon	153983798	153983865	.	+	.	gene_id "XLOC_001314"; transcript_id "TCONS_00002230"; exon_number "4"; gene_name "CAPN7"; oId "CUFF.2611.2"; nearest_ref "ENSBTAT00000008495"; class_code "j"; tss_id "TSS1602";
1	Cufflinks	exon	153987125	153987325	.	+	.	gene_id "XLOC_001314"; transcript_id "TCONS_00002230"; exon_number "5"; gene_name "CAPN7"; oId "CUFF.2611.2"; nearest_ref "ENSBTAT00000008495"; class_code "j"; tss_id "TSS1602";
1	Cufflinks	exon	153989095	153989181	.	+	.	gene_id "XLOC_001314"; transcript_id "TCONS_00002230"; exon_number "6"; gene_name "CAPN7"; oId "CUFF.2611.2"; nearest_ref "ENSBTAT00000008495"; class_code "j"; tss_id "TSS1602";
1	Cufflinks	exon	153993665	153993791	.	+	.	gene_id "XLOC_001314"; transcript_id "TCONS_00002230"; exon_number "7"; gene_name "CAPN7"; oId "CUFF.2611.2"; nearest_ref "ENSBTAT00000008495"; class_code "j"; tss_id "TSS1602";
1	Cufflinks	exon	153994572	153994657	.	+	.	gene_id "XLOC_001314"; transcript_id "TCONS_00002230"; exon_number "8"; gene_name "CAPN7"; oId "CUFF.2611.2"; nearest_ref "ENSBTAT00000008495"; class_code "j"; tss_id "TSS1602";
1	Cufflinks	exon	153995299	153995336	.	+	.	gene_id "XLOC_001314"; transcript_id "TCONS_00002230"; exon_number "9"; gene_name "CAPN7"; oId "CUFF.2611.2"; nearest_ref "ENSBTAT00000008495"; class_code "j"; tss_id "TSS1602";
1	Cufflinks	exon	153995894	153995987	.	+	.	gene_id "XLOC_001314"; transcript_id "TCONS_00002230"; exon_number "10"; gene_name "CAPN7"; oId "CUFF.2611.2"; nearest_ref "ENSBTAT00000008495"; class_code "j"; tss_id "TSS1602";
1	Cufflinks	exon	153997681	153997827	.	+	.	gene_id "XLOC_001314"; transcript_id "TCONS_00002230"; exon_number "11"; gene_name "CAPN7"; oId "CUFF.2611.2"; nearest_ref "ENSBTAT00000008495"; class_code "j"; tss_id "TSS1602";
1	Cufflinks	exon	153999139	153999245	.	+	.	gene_id "XLOC_001314"; transcript_id "TCONS_00002230"; exon_number "12"; gene_name "CAPN7"; oId "CUFF.2611.2"; nearest_ref "ENSBTAT00000008495"; class_code "j"; tss_id "TSS1602";
1	Cufflinks	exon	153999974	154000094	.	+	.	gene_id "XLOC_001314"; transcript_id "TCONS_00002230"; exon_number "13"; gene_name "CAPN7"; oId "CUFF.2611.2"; nearest_ref "ENSBTAT00000008495"; class_code "j"; tss_id "TSS1602";
1	Cufflinks	exon	154011712	154011856	.	+	.	gene_id "XLOC_001314"; transcript_id "TCONS_00002230"; exon_number "14"; gene_name "CAPN7"; oId "CUFF.2611.2"; nearest_ref "ENSBTAT00000008495"; class_code "j"; tss_id "TSS1602";
1	Cufflinks	exon	154011972	154012071	.	+	.	gene_id "XLOC_001314"; transcript_id "TCONS_00002230"; exon_number "15"; gene_name "CAPN7"; oId "CUFF.2611.2"; nearest_ref "ENSBTAT00000008495"; class_code "j"; tss_id "TSS1602";
1	Cufflinks	exon	154012690	154012825	.	+	.	gene_id "XLOC_001314"; transcript_id "TCONS_00002230"; exon_number "16"; gene_name "CAPN7"; oId "CUFF.2611.2"; nearest_ref "ENSBTAT00000008495"; class_code "j"; tss_id "TSS1602";
1	Cufflinks	exon	154013416	154013491	.	+	.	gene_id "XLOC_001314"; transcript_id "TCONS_00002230"; exon_number "17"; gene_name "CAPN7"; oId "CUFF.2611.2"; nearest_ref "ENSBTAT00000008495"; class_code "j"; tss_id "TSS1602";
1	Cufflinks	exon	154017425	154017487	.	+	.	gene_id "XLOC_001314"; transcript_id "TCONS_00002230"; exon_number "18"; gene_name "CAPN7"; oId "CUFF.2611.2"; nearest_ref "ENSBTAT00000008495"; class_code "j"; tss_id "TSS1602";
1	Cufflinks	exon	154018028	154018158	.	+	.	gene_id "XLOC_001314"; transcript_id "TCONS_00002230"; exon_number "19"; gene_name "CAPN7"; oId "CUFF.2611.2"; nearest_ref "ENSBTAT00000008495"; class_code "j"; tss_id "TSS1602";
1	Cufflinks	exon	154021085	154021177	.	+	.	gene_id "XLOC_001314"; transcript_id "TCONS_00002230"; exon_number "20"; gene_name "CAPN7"; oId "CUFF.2611.2"; nearest_ref "ENSBTAT00000008495"; class_code "j"; tss_id "TSS1602";
1	Cufflinks	exon	154021271	154022508	.	+	.	gene_id "XLOC_001314"; transcript_id "TCONS_00002230"; exon_number "21"; gene_name "CAPN7"; oId "CUFF.2611.2"; nearest_ref "ENSBTAT00000008495"; class_code "j"; tss_id "TSS1602";
1	Cufflinks	exon	153971502	153971603	.	+	.	gene_id "XLOC_001314"; transcript_id "TCONS_00002233"; exon_number "1"; gene_name "CAPN7"; oId "CUFF.2611.5"; nearest_ref "ENSBTAT00000008495"; class_code "="; tss_id "TSS1603"; p_id "P433";
1	Cufflinks	exon	153973774	153973882	.	+	.	gene_id "XLOC_001314"; transcript_id "TCONS_00002233"; exon_number "2"; gene_name "CAPN7"; oId "CUFF.2611.5"; nearest_ref "ENSBTAT00000008495"; class_code "="; tss_id "TSS1603"; p_id "P433";
1	Cufflinks	exon	153982086	153982243	.	+	.	gene_id "XLOC_001314"; transcript_id "TCONS_00002233"; exon_number "3"; gene_name "CAPN7"; oId "CUFF.2611.5"; nearest_ref "ENSBTAT00000008495"; class_code "="; tss_id "TSS1603"; p_id "P433";
1	Cufflinks	exon	153983798	153983865	.	+	.	gene_id "XLOC_001314"; transcript_id "TCONS_00002233"; exon_number "4"; gene_name "CAPN7"; oId "CUFF.2611.5"; nearest_ref "ENSBTAT00000008495"; class_code "="; tss_id "TSS1603"; p_id "P433";
1	Cufflinks	exon	153987125	153987325	.	+	.	gene_id "XLOC_001314"; transcript_id "TCONS_00002233"; exon_number "5"; gene_name "CAPN7"; oId "CUFF.2611.5"; nearest_ref "ENSBTAT00000008495"; class_code "="; tss_id "TSS1603"; p_id "P433";
1	Cufflinks	exon	153989095	153989181	.	+	.	gene_id "XLOC_001314"; transcript_id "TCONS_00002233"; exon_number "6"; gene_name "CAPN7"; oId "CUFF.2611.5"; nearest_ref "ENSBTAT00000008495"; class_code "="; tss_id "TSS1603"; p_id "P433";
1	Cufflinks	exon	153993665	153993791	.	+	.	gene_id "XLOC_001314"; transcript_id "TCONS_00002233"; exon_number "7"; gene_name "CAPN7"; oId "CUFF.2611.5"; nearest_ref "ENSBTAT00000008495"; class_code "="; tss_id "TSS1603"; p_id "P433";
1	Cufflinks	exon	153994572	153994657	.	+	.	gene_id "XLOC_001314"; transcript_id "TCONS_00002233"; exon_number "8"; gene_name "CAPN7"; oId "CUFF.2611.5"; nearest_ref "ENSBTAT00000008495"; class_code "="; tss_id "TSS1603"; p_id "P433";
1	Cufflinks	exon	153995894	153995987	.	+	.	gene_id "XLOC_001314"; transcript_id "TCONS_00002233"; exon_number "9"; gene_name "CAPN7"; oId "CUFF.2611.5"; nearest_ref "ENSBTAT00000008495"; class_code "="; tss_id "TSS1603"; p_id "P433";
1	Cufflinks	exon	153997681	153997827	.	+	.	gene_id "XLOC_001314"; transcript_id "TCONS_00002233"; exon_number "10"; gene_name "CAPN7"; oId "CUFF.2611.5"; nearest_ref "ENSBTAT00000008495"; class_code "="; tss_id "TSS1603"; p_id "P433";
1	Cufflinks	exon	153999139	153999245	.	+	.	gene_id "XLOC_001314"; transcript_id "TCONS_00002233"; exon_number "11"; gene_name "CAPN7"; oId "CUFF.2611.5"; nearest_ref "ENSBTAT00000008495"; class_code "="; tss_id "TSS1603"; p_id "P433";
1	Cufflinks	exon	153999974	154000094	.	+	.	gene_id "XLOC_001314"; transcript_id "TCONS_00002233"; exon_number "12"; gene_name "CAPN7"; oId "CUFF.2611.5"; nearest_ref "ENSBTAT00000008495"; class_code "="; tss_id "TSS1603"; p_id "P433";
1	Cufflinks	exon	154011712	154011856	.	+	.	gene_id "XLOC_001314"; transcript_id "TCONS_00002233"; exon_number "13"; gene_name "CAPN7"; oId "CUFF.2611.5"; nearest_ref "ENSBTAT00000008495"; class_code "="; tss_id "TSS1603"; p_id "P433";
1	Cufflinks	exon	154011972	154012071	.	+	.	gene_id "XLOC_001314"; transcript_id "TCONS_00002233"; exon_number "14"; gene_name "CAPN7"; oId "CUFF.2611.5"; nearest_ref "ENSBTAT00000008495"; class_code "="; tss_id "TSS1603"; p_id "P433";
1	Cufflinks	exon	154012690	154012825	.	+	.	gene_id "XLOC_001314"; transcript_id "TCONS_00002233"; exon_number "15"; gene_name "CAPN7"; oId "CUFF.2611.5"; nearest_ref "ENSBTAT00000008495"; class_code "="; tss_id "TSS1603"; p_id "P433";
1	Cufflinks	exon	154013416	154013491	.	+	.	gene_id "XLOC_001314"; transcript_id "TCONS_00002233"; exon_number "16"; gene_name "CAPN7"; oId "CUFF.2611.5"; nearest_ref "ENSBTAT00000008495"; class_code "="; tss_id "TSS1603"; p_id "P433";
1	Cufflinks	exon	154016459	154016604	.	+	.	gene_id "XLOC_001314"; transcript_id "TCONS_00002233"; exon_number "17"; gene_name "CAPN7"; oId "CUFF.2611.5"; nearest_ref "ENSBTAT00000008495"; class_code "="; tss_id "TSS1603"; p_id "P433";
1	Cufflinks	exon	154017425	154017487	.	+	.	gene_id "XLOC_001314"; transcript_id "TCONS_00002233"; exon_number "18"; gene_name "CAPN7"; oId "CUFF.2611.5"; nearest_ref "ENSBTAT00000008495"; class_code "="; tss_id "TSS1603"; p_id "P433";
1	Cufflinks	exon	154018028	154018158	.	+	.	gene_id "XLOC_001314"; transcript_id "TCONS_00002233"; exon_number "19"; gene_name "CAPN7"; oId "CUFF.2611.5"; nearest_ref "ENSBTAT00000008495"; class_code "="; tss_id "TSS1603"; p_id "P433";
1	Cufflinks	exon	154021085	154021177	.	+	.	gene_id "XLOC_001314"; transcript_id "TCONS_00002233"; exon_number "20"; gene_name "CAPN7"; oId "CUFF.2611.5"; nearest_ref "ENSBTAT00000008495"; class_code "="; tss_id "TSS1603"; p_id "P433";
1	Cufflinks	exon	154021271	154022508	.	+	.	gene_id "XLOC_001314"; transcript_id "TCONS_00002233"; exon_number "21"; gene_name "CAPN7"; oId "CUFF.2611.5"; nearest_ref "ENSBTAT00000008495"; class_code "="; tss_id "TSS1603"; p_id "P433";
1	Cufflinks	exon	153971502	153971603	.	+	.	gene_id "XLOC_001314"; transcript_id "TCONS_00002232"; exon_number "1"; gene_name "CAPN7"; oId "CUFF.2611.4"; nearest_ref "ENSBTAT00000008495"; class_code "j"; tss_id "TSS1603";
1	Cufflinks	exon	153973774	153973882	.	+	.	gene_id "XLOC_001314"; transcript_id "TCONS_00002232"; exon_number "2"; gene_name "CAPN7"; oId "CUFF.2611.4"; nearest_ref "ENSBTAT00000008495"; class_code "j"; tss_id "TSS1603";
1	Cufflinks	exon	153982086	153982243	.	+	.	gene_id "XLOC_001314"; transcript_id "TCONS_00002232"; exon_number "3"; gene_name "CAPN7"; oId "CUFF.2611.4"; nearest_ref "ENSBTAT00000008495"; class_code "j"; tss_id "TSS1603";
1	Cufflinks	exon	153983798	153983865	.	+	.	gene_id "XLOC_001314"; transcript_id "TCONS_00002232"; exon_number "4"; gene_name "CAPN7"; oId "CUFF.2611.4"; nearest_ref "ENSBTAT00000008495"; class_code "j"; tss_id "TSS1603";
1	Cufflinks	exon	153987125	153987325	.	+	.	gene_id "XLOC_001314"; transcript_id "TCONS_00002232"; exon_number "5"; gene_name "CAPN7"; oId "CUFF.2611.4"; nearest_ref "ENSBTAT00000008495"; class_code "j"; tss_id "TSS1603";
1	Cufflinks	exon	153989095	153989181	.	+	.	gene_id "XLOC_001314"; transcript_id "TCONS_00002232"; exon_number "6"; gene_name "CAPN7"; oId "CUFF.2611.4"; nearest_ref "ENSBTAT00000008495"; class_code "j"; tss_id "TSS1603";
1	Cufflinks	exon	153993665	153993791	.	+	.	gene_id "XLOC_001314"; transcript_id "TCONS_00002232"; exon_number "7"; gene_name "CAPN7"; oId "CUFF.2611.4"; nearest_ref "ENSBTAT00000008495"; class_code "j"; tss_id "TSS1603";
1	Cufflinks	exon	153994572	153994657	.	+	.	gene_id "XLOC_001314"; transcript_id "TCONS_00002232"; exon_number "8"; gene_name "CAPN7"; oId "CUFF.2611.4"; nearest_ref "ENSBTAT00000008495"; class_code "j"; tss_id "TSS1603";
1	Cufflinks	exon	153995894	153995987	.	+	.	gene_id "XLOC_001314"; transcript_id "TCONS_00002232"; exon_number "9"; gene_name "CAPN7"; oId "CUFF.2611.4"; nearest_ref "ENSBTAT00000008495"; class_code "j"; tss_id "TSS1603";
1	Cufflinks	exon	153997681	153997827	.	+	.	gene_id "XLOC_001314"; transcript_id "TCONS_00002232"; exon_number "10"; gene_name "CAPN7"; oId "CUFF.2611.4"; nearest_ref "ENSBTAT00000008495"; class_code "j"; tss_id "TSS1603";
1	Cufflinks	exon	153999139	153999245	.	+	.	gene_id "XLOC_001314"; transcript_id "TCONS_00002232"; exon_number "11"; gene_name "CAPN7"; oId "CUFF.2611.4"; nearest_ref "ENSBTAT00000008495"; class_code "j"; tss_id "TSS1603";
1	Cufflinks	exon	153999974	154000094	.	+	.	gene_id "XLOC_001314"; transcript_id "TCONS_00002232"; exon_number "12"; gene_name "CAPN7"; oId "CUFF.2611.4"; nearest_ref "ENSBTAT00000008495"; class_code "j"; tss_id "TSS1603";
1	Cufflinks	exon	154011712	154011856	.	+	.	gene_id "XLOC_001314"; transcript_id "TCONS_00002232"; exon_number "13"; gene_name "CAPN7"; oId "CUFF.2611.4"; nearest_ref "ENSBTAT00000008495"; class_code "j"; tss_id "TSS1603";
1	Cufflinks	exon	154011972	154012071	.	+	.	gene_id "XLOC_001314"; transcript_id "TCONS_00002232"; exon_number "14"; gene_name "CAPN7"; oId "CUFF.2611.4"; nearest_ref "ENSBTAT00000008495"; class_code "j"; tss_id "TSS1603";
1	Cufflinks	exon	154012690	154012762	.	+	.	gene_id "XLOC_001314"; transcript_id "TCONS_00002232"; exon_number "15"; gene_name "CAPN7"; oId "CUFF.2611.4"; nearest_ref "ENSBTAT00000008495"; class_code "j"; tss_id "TSS1603";
1	Cufflinks	exon	154013416	154013491	.	+	.	gene_id "XLOC_001314"; transcript_id "TCONS_00002232"; exon_number "16"; gene_name "CAPN7"; oId "CUFF.2611.4"; nearest_ref "ENSBTAT00000008495"; class_code "j"; tss_id "TSS1603";
1	Cufflinks	exon	154016459	154016604	.	+	.	gene_id "XLOC_001314"; transcript_id "TCONS_00002232"; exon_number "17"; gene_name "CAPN7"; oId "CUFF.2611.4"; nearest_ref "ENSBTAT00000008495"; class_code "j"; tss_id "TSS1603";
1	Cufflinks	exon	154017425	154017487	.	+	.	gene_id "XLOC_001314"; transcript_id "TCONS_00002232"; exon_number "18"; gene_name "CAPN7"; oId "CUFF.2611.4"; nearest_ref "ENSBTAT00000008495"; class_code "j"; tss_id "TSS1603";
1	Cufflinks	exon	154018028	154018158	.	+	.	gene_id "XLOC_001314"; transcript_id "TCONS_00002232"; exon_number "19"; gene_name "CAPN7"; oId "CUFF.2611.4"; nearest_ref "ENSBTAT00000008495"; class_code "j"; tss_id "TSS1603";
1	Cufflinks	exon	154021085	154021177	.	+	.	gene_id "XLOC_001314"; transcript_id "TCONS_00002232"; exon_number "20"; gene_name "CAPN7"; oId "CUFF.2611.4"; nearest_ref "ENSBTAT00000008495"; class_code "j"; tss_id "TSS1603";
1	Cufflinks	exon	154021271	154022508	.	+	.	gene_id "XLOC_001314"; transcript_id "TCONS_00002232"; exon_number "21"; gene_name "CAPN7"; oId "CUFF.2611.4"; nearest_ref "ENSBTAT00000008495"; class_code "j"; tss_id "TSS1603";
1	Cufflinks	exon	153971725	153971879	.	+	.	gene_id "XLOC_001314"; transcript_id "TCONS_00002234"; exon_number "1"; gene_name "CAPN7"; oId "CUFF.2611.6"; nearest_ref "ENSBTAT00000008495"; class_code "j"; tss_id "TSS1604";
1	Cufflinks	exon	153973774	153973882	.	+	.	gene_id "XLOC_001314"; transcript_id "TCONS_00002234"; exon_number "2"; gene_name "CAPN7"; oId "CUFF.2611.6"; nearest_ref "ENSBTAT00000008495"; class_code "j"; tss_id "TSS1604";
1	Cufflinks	exon	153982086	153982243	.	+	.	gene_id "XLOC_001314"; transcript_id "TCONS_00002234"; exon_number "3"; gene_name "CAPN7"; oId "CUFF.2611.6"; nearest_ref "ENSBTAT00000008495"; class_code "j"; tss_id "TSS1604";
1	Cufflinks	exon	153983798	153983865	.	+	.	gene_id "XLOC_001314"; transcript_id "TCONS_00002234"; exon_number "4"; gene_name "CAPN7"; oId "CUFF.2611.6"; nearest_ref "ENSBTAT00000008495"; class_code "j"; tss_id "TSS1604";
1	Cufflinks	exon	153987125	153987325	.	+	.	gene_id "XLOC_001314"; transcript_id "TCONS_00002234"; exon_number "5"; gene_name "CAPN7"; oId "CUFF.2611.6"; nearest_ref "ENSBTAT00000008495"; class_code "j"; tss_id "TSS1604";
1	Cufflinks	exon	153989095	153989181	.	+	.	gene_id "XLOC_001314"; transcript_id "TCONS_00002234"; exon_number "6"; gene_name "CAPN7"; oId "CUFF.2611.6"; nearest_ref "ENSBTAT00000008495"; class_code "j"; tss_id "TSS1604";
1	Cufflinks	exon	153993665	153993791	.	+	.	gene_id "XLOC_001314"; transcript_id "TCONS_00002234"; exon_number "7"; gene_name "CAPN7"; oId "CUFF.2611.6"; nearest_ref "ENSBTAT00000008495"; class_code "j"; tss_id "TSS1604";
1	Cufflinks	exon	153994572	153994657	.	+	.	gene_id "XLOC_001314"; transcript_id "TCONS_00002234"; exon_number "8"; gene_name "CAPN7"; oId "CUFF.2611.6"; nearest_ref "ENSBTAT00000008495"; class_code "j"; tss_id "TSS1604";
1	Cufflinks	exon	153995894	153995987	.	+	.	gene_id "XLOC_001314"; transcript_id "TCONS_00002234"; exon_number "9"; gene_name "CAPN7"; oId "CUFF.2611.6"; nearest_ref "ENSBTAT00000008495"; class_code "j"; tss_id "TSS1604";
1	Cufflinks	exon	153997681	153997827	.	+	.	gene_id "XLOC_001314"; transcript_id "TCONS_00002234"; exon_number "10"; gene_name "CAPN7"; oId "CUFF.2611.6"; nearest_ref "ENSBTAT00000008495"; class_code "j"; tss_id "TSS1604";
1	Cufflinks	exon	153999139	153999245	.	+	.	gene_id "XLOC_001314"; transcript_id "TCONS_00002234"; exon_number "11"; gene_name "CAPN7"; oId "CUFF.2611.6"; nearest_ref "ENSBTAT00000008495"; class_code "j"; tss_id "TSS1604";
1	Cufflinks	exon	153999974	154000094	.	+	.	gene_id "XLOC_001314"; transcript_id "TCONS_00002234"; exon_number "12"; gene_name "CAPN7"; oId "CUFF.2611.6"; nearest_ref "ENSBTAT00000008495"; class_code "j"; tss_id "TSS1604";
1	Cufflinks	exon	154011712	154011856	.	+	.	gene_id "XLOC_001314"; transcript_id "TCONS_00002234"; exon_number "13"; gene_name "CAPN7"; oId "CUFF.2611.6"; nearest_ref "ENSBTAT00000008495"; class_code "j"; tss_id "TSS1604";
1	Cufflinks	exon	154011972	154012071	.	+	.	gene_id "XLOC_001314"; transcript_id "TCONS_00002234"; exon_number "14"; gene_name "CAPN7"; oId "CUFF.2611.6"; nearest_ref "ENSBTAT00000008495"; class_code "j"; tss_id "TSS1604";
1	Cufflinks	exon	154012690	154012825	.	+	.	gene_id "XLOC_001314"; transcript_id "TCONS_00002234"; exon_number "15"; gene_name "CAPN7"; oId "CUFF.2611.6"; nearest_ref "ENSBTAT00000008495"; class_code "j"; tss_id "TSS1604";
1	Cufflinks	exon	154013416	154013491	.	+	.	gene_id "XLOC_001314"; transcript_id "TCONS_00002234"; exon_number "16"; gene_name "CAPN7"; oId "CUFF.2611.6"; nearest_ref "ENSBTAT00000008495"; class_code "j"; tss_id "TSS1604";
1	Cufflinks	exon	154016459	154016604	.	+	.	gene_id "XLOC_001314"; transcript_id "TCONS_00002234"; exon_number "17"; gene_name "CAPN7"; oId "CUFF.2611.6"; nearest_ref "ENSBTAT00000008495"; class_code "j"; tss_id "TSS1604";
1	Cufflinks	exon	154017425	154017487	.	+	.	gene_id "XLOC_001314"; transcript_id "TCONS_00002234"; exon_number "18"; gene_name "CAPN7"; oId "CUFF.2611.6"; nearest_ref "ENSBTAT00000008495"; class_code "j"; tss_id "TSS1604";
1	Cufflinks	exon	154018028	154018158	.	+	.	gene_id "XLOC_001314"; transcript_id "TCONS_00002234"; exon_number "19"; gene_name "CAPN7"; oId "CUFF.2611.6"; nearest_ref "ENSBTAT00000008495"; class_code "j"; tss_id "TSS1604";
1	Cufflinks	exon	154021085	154021177	.	+	.	gene_id "XLOC_001314"; transcript_id "TCONS_00002234"; exon_number "20"; gene_name "CAPN7"; oId "CUFF.2611.6"; nearest_ref "ENSBTAT00000008495"; class_code "j"; tss_id "TSS1604";
1	Cufflinks	exon	154021271	154022508	.	+	.	gene_id "XLOC_001314"; transcript_id "TCONS_00002234"; exon_number "21"; gene_name "CAPN7"; oId "CUFF.2611.6"; nearest_ref "ENSBTAT00000008495"; class_code "j"; tss_id "TSS1604";
1	Cufflinks	exon	154014892	154017487	.	+	.	gene_id "XLOC_001314"; transcript_id "TCONS_00002236"; exon_number "1"; gene_name "CAPN7"; oId "CUFF.2611.8"; nearest_ref "ENSBTAT00000008495"; class_code "j"; tss_id "TSS1605";
1	Cufflinks	exon	154018028	154018158	.	+	.	gene_id "XLOC_001314"; transcript_id "TCONS_00002236"; exon_number "2"; gene_name "CAPN7"; oId "CUFF.2611.8"; nearest_ref "ENSBTAT00000008495"; class_code "j"; tss_id "TSS1605";
1	Cufflinks	exon	154021085	154021177	.	+	.	gene_id "XLOC_001314"; transcript_id "TCONS_00002236"; exon_number "3"; gene_name "CAPN7"; oId "CUFF.2611.8"; nearest_ref "ENSBTAT00000008495"; class_code "j"; tss_id "TSS1605";
1	Cufflinks	exon	154021271	154022508	.	+	.	gene_id "XLOC_001314"; transcript_id "TCONS_00002236"; exon_number "4"; gene_name "CAPN7"; oId "CUFF.2611.8"; nearest_ref "ENSBTAT00000008495"; class_code "j"; tss_id "TSS1605";
1	Cufflinks	exon	154014892	154015438	.	+	.	gene_id "XLOC_001314"; transcript_id "TCONS_00002235"; exon_number "1"; gene_name "CAPN7"; oId "CUFF.2611.7"; nearest_ref "ENSBTAT00000008495"; class_code "j"; tss_id "TSS1605";
1	Cufflinks	exon	154016459	154016604	.	+	.	gene_id "XLOC_001314"; transcript_id "TCONS_00002235"; exon_number "2"; gene_name "CAPN7"; oId "CUFF.2611.7"; nearest_ref "ENSBTAT00000008495"; class_code "j"; tss_id "TSS1605";
1	Cufflinks	exon	154017425	154017487	.	+	.	gene_id "XLOC_001314"; transcript_id "TCONS_00002235"; exon_number "3"; gene_name "CAPN7"; oId "CUFF.2611.7"; nearest_ref "ENSBTAT00000008495"; class_code "j"; tss_id "TSS1605";
1	Cufflinks	exon	154018028	154018158	.	+	.	gene_id "XLOC_001314"; transcript_id "TCONS_00002235"; exon_number "4"; gene_name "CAPN7"; oId "CUFF.2611.7"; nearest_ref "ENSBTAT00000008495"; class_code "j"; tss_id "TSS1605";
1	Cufflinks	exon	154021085	154021177	.	+	.	gene_id "XLOC_001314"; transcript_id "TCONS_00002235"; exon_number "5"; gene_name "CAPN7"; oId "CUFF.2611.7"; nearest_ref "ENSBTAT00000008495"; class_code "j"; tss_id "TSS1605";
1	Cufflinks	exon	154021271	154022508	.	+	.	gene_id "XLOC_001314"; transcript_id "TCONS_00002235"; exon_number "6"; gene_name "CAPN7"; oId "CUFF.2611.7"; nearest_ref "ENSBTAT00000008495"; class_code "j"; tss_id "TSS1605";
1	Cufflinks	exon	154434704	154435806	.	+	.	gene_id "XLOC_001326"; transcript_id "TCONS_00002250"; exon_number "1"; oId "CUFF.2644.1"; class_code "u"; tss_id "TSS1617";
1	Cufflinks	exon	154668947	154669387	.	+	.	gene_id "XLOC_001330"; transcript_id "TCONS_00002254"; exon_number "1"; oId "CUFF.2655.1"; class_code "u"; tss_id "TSS1621";
1	Cufflinks	exon	1222748	1223433	.	-	.	gene_id "XLOC_001361"; transcript_id "TCONS_00002318"; exon_number "1"; gene_name "CRYZL1"; oId "CUFF.14.1"; nearest_ref "ENSBTAT00000049681"; class_code "x"; tss_id "TSS1667";
1	Cufflinks	exon	6117175	6118037	.	-	.	gene_id "XLOC_001403"; transcript_id "TCONS_00002387"; exon_number "1"; oId "CUFF.115.1"; class_code "u"; tss_id "TSS1716";
1	Cufflinks	exon	6174293	6174890	.	-	.	gene_id "XLOC_001409"; transcript_id "TCONS_00002398"; exon_number "1"; oId "CUFF.137.1"; class_code "u"; tss_id "TSS1725";
1	Cufflinks	exon	6520376	6521388	.	-	.	gene_id "XLOC_001417"; transcript_id "TCONS_00002419"; exon_number "1"; gene_name "RWDD2B"; oId "CUFF.131.1"; nearest_ref "ENSBTAT00000026800"; class_code "x"; tss_id "TSS1736";
1	Cufflinks	exon	8804873	8805884	.	-	.	gene_id "XLOC_001425"; transcript_id "TCONS_00002430"; exon_number "1"; oId "CUFF.135.1"; class_code "u"; tss_id "TSS1745";
1	Cufflinks	exon	20658054	20658532	.	-	.	gene_id "XLOC_001517"; transcript_id "TCONS_00002530"; exon_number "1"; oId "CUFF.181.1"; class_code "u"; tss_id "TSS1841";
1	Cufflinks	exon	34950311	34951481	.	-	.	gene_id "XLOC_001534"; transcript_id "TCONS_00002568"; exon_number "1"; oId "CUFF.341.1"; class_code "u"; tss_id "TSS1864";
1	Cufflinks	exon	34951704	34952998	.	-	.	gene_id "XLOC_001535"; transcript_id "TCONS_00002569"; exon_number "1"; oId "CUFF.343.1"; class_code "u"; tss_id "TSS1865";
1	Cufflinks	exon	34954307	34955247	.	-	.	gene_id "XLOC_001537"; transcript_id "TCONS_00002571"; exon_number "1"; oId "CUFF.344.1"; class_code "u"; tss_id "TSS1867";
1	Cufflinks	exon	42950817	42951127	.	-	.	gene_id "XLOC_001565"; transcript_id "TCONS_00002616"; exon_number "1"; oId "CUFF.431.1"; class_code "u"; tss_id "TSS1899";
1	Cufflinks	exon	44331901	44332161	.	-	.	gene_id "XLOC_001568"; transcript_id "TCONS_00002622"; exon_number "1"; oId "CUFF.458.1"; class_code "u"; tss_id "TSS1904";
1	Cufflinks	exon	51723840	51724939	.	-	.	gene_id "XLOC_001600"; transcript_id "TCONS_00002705"; exon_number "1"; oId "CUFF.521.1"; class_code "u"; tss_id "TSS1944";
1	Cufflinks	exon	53726459	53727663	.	-	.	gene_id "XLOC_001614"; transcript_id "TCONS_00002722"; exon_number "1"; gene_name "KIAA1524"; oId "CUFF.554.3"; nearest_ref "ENSBTAT00000022784"; class_code "j"; tss_id "TSS1960";
1	Cufflinks	exon	53728873	53729437	.	-	.	gene_id "XLOC_001614"; transcript_id "TCONS_00002722"; exon_number "2"; gene_name "KIAA1524"; oId "CUFF.554.3"; nearest_ref "ENSBTAT00000022784"; class_code "j"; tss_id "TSS1960";
1	Cufflinks	exon	53726459	53727663	.	-	.	gene_id "XLOC_001614"; transcript_id "TCONS_00002724"; exon_number "1"; gene_name "KIAA1524"; oId "CUFF.554.2"; nearest_ref "ENSBTAT00000022784"; class_code "="; tss_id "TSS1961"; p_id "P511";
1	Cufflinks	exon	53728873	53729012	.	-	.	gene_id "XLOC_001614"; transcript_id "TCONS_00002724"; exon_number "2"; gene_name "KIAA1524"; oId "CUFF.554.2"; nearest_ref "ENSBTAT00000022784"; class_code "="; tss_id "TSS1961"; p_id "P511";
1	Cufflinks	exon	53729963	53730045	.	-	.	gene_id "XLOC_001614"; transcript_id "TCONS_00002724"; exon_number "3"; gene_name "KIAA1524"; oId "CUFF.554.2"; nearest_ref "ENSBTAT00000022784"; class_code "="; tss_id "TSS1961"; p_id "P511";
1	Cufflinks	exon	53730292	53730405	.	-	.	gene_id "XLOC_001614"; transcript_id "TCONS_00002724"; exon_number "4"; gene_name "KIAA1524"; oId "CUFF.554.2"; nearest_ref "ENSBTAT00000022784"; class_code "="; tss_id "TSS1961"; p_id "P511";
1	Cufflinks	exon	53732543	53732739	.	-	.	gene_id "XLOC_001614"; transcript_id "TCONS_00002724"; exon_number "5"; gene_name "KIAA1524"; oId "CUFF.554.2"; nearest_ref "ENSBTAT00000022784"; class_code "="; tss_id "TSS1961"; p_id "P511";
1	Cufflinks	exon	53734122	53734232	.	-	.	gene_id "XLOC_001614"; transcript_id "TCONS_00002724"; exon_number "6"; gene_name "KIAA1524"; oId "CUFF.554.2"; nearest_ref "ENSBTAT00000022784"; class_code "="; tss_id "TSS1961"; p_id "P511";
1	Cufflinks	exon	53734324	53734398	.	-	.	gene_id "XLOC_001614"; transcript_id "TCONS_00002724"; exon_number "7"; gene_name "KIAA1524"; oId "CUFF.554.2"; nearest_ref "ENSBTAT00000022784"; class_code "="; tss_id "TSS1961"; p_id "P511";
1	Cufflinks	exon	53735075	53735270	.	-	.	gene_id "XLOC_001614"; transcript_id "TCONS_00002724"; exon_number "8"; gene_name "KIAA1524"; oId "CUFF.554.2"; nearest_ref "ENSBTAT00000022784"; class_code "="; tss_id "TSS1961"; p_id "P511";
1	Cufflinks	exon	53736487	53736605	.	-	.	gene_id "XLOC_001614"; transcript_id "TCONS_00002724"; exon_number "9"; gene_name "KIAA1524"; oId "CUFF.554.2"; nearest_ref "ENSBTAT00000022784"; class_code "="; tss_id "TSS1961"; p_id "P511";
1	Cufflinks	exon	53738279	53738378	.	-	.	gene_id "XLOC_001614"; transcript_id "TCONS_00002724"; exon_number "10"; gene_name "KIAA1524"; oId "CUFF.554.2"; nearest_ref "ENSBTAT00000022784"; class_code "="; tss_id "TSS1961"; p_id "P511";
1	Cufflinks	exon	53739701	53739842	.	-	.	gene_id "XLOC_001614"; transcript_id "TCONS_00002724"; exon_number "11"; gene_name "KIAA1524"; oId "CUFF.554.2"; nearest_ref "ENSBTAT00000022784"; class_code "="; tss_id "TSS1961"; p_id "P511";
1	Cufflinks	exon	53741079	53741238	.	-	.	gene_id "XLOC_001614"; transcript_id "TCONS_00002724"; exon_number "12"; gene_name "KIAA1524"; oId "CUFF.554.2"; nearest_ref "ENSBTAT00000022784"; class_code "="; tss_id "TSS1961"; p_id "P511";
1	Cufflinks	exon	53742644	53742862	.	-	.	gene_id "XLOC_001614"; transcript_id "TCONS_00002724"; exon_number "13"; gene_name "KIAA1524"; oId "CUFF.554.2"; nearest_ref "ENSBTAT00000022784"; class_code "="; tss_id "TSS1961"; p_id "P511";
1	Cufflinks	exon	53745909	53745984	.	-	.	gene_id "XLOC_001614"; transcript_id "TCONS_00002724"; exon_number "14"; gene_name "KIAA1524"; oId "CUFF.554.2"; nearest_ref "ENSBTAT00000022784"; class_code "="; tss_id "TSS1961"; p_id "P511";
1	Cufflinks	exon	53746358	53746503	.	-	.	gene_id "XLOC_001614"; transcript_id "TCONS_00002724"; exon_number "15"; gene_name "KIAA1524"; oId "CUFF.554.2"; nearest_ref "ENSBTAT00000022784"; class_code "="; tss_id "TSS1961"; p_id "P511";
1	Cufflinks	exon	53746650	53746772	.	-	.	gene_id "XLOC_001614"; transcript_id "TCONS_00002724"; exon_number "16"; gene_name "KIAA1524"; oId "CUFF.554.2"; nearest_ref "ENSBTAT00000022784"; class_code "="; tss_id "TSS1961"; p_id "P511";
1	Cufflinks	exon	53747918	53748014	.	-	.	gene_id "XLOC_001614"; transcript_id "TCONS_00002724"; exon_number "17"; gene_name "KIAA1524"; oId "CUFF.554.2"; nearest_ref "ENSBTAT00000022784"; class_code "="; tss_id "TSS1961"; p_id "P511";
1	Cufflinks	exon	53749267	53749361	.	-	.	gene_id "XLOC_001614"; transcript_id "TCONS_00002724"; exon_number "18"; gene_name "KIAA1524"; oId "CUFF.554.2"; nearest_ref "ENSBTAT00000022784"; class_code "="; tss_id "TSS1961"; p_id "P511";
1	Cufflinks	exon	53750536	53750648	.	-	.	gene_id "XLOC_001614"; transcript_id "TCONS_00002724"; exon_number "19"; gene_name "KIAA1524"; oId "CUFF.554.2"; nearest_ref "ENSBTAT00000022784"; class_code "="; tss_id "TSS1961"; p_id "P511";
1	Cufflinks	exon	53751740	53751887	.	-	.	gene_id "XLOC_001614"; transcript_id "TCONS_00002724"; exon_number "20"; gene_name "KIAA1524"; oId "CUFF.554.2"; nearest_ref "ENSBTAT00000022784"; class_code "="; tss_id "TSS1961"; p_id "P511";
1	Cufflinks	exon	53753669	53754034	.	-	.	gene_id "XLOC_001614"; transcript_id "TCONS_00002724"; exon_number "21"; gene_name "KIAA1524"; oId "CUFF.554.2"; nearest_ref "ENSBTAT00000022784"; class_code "="; tss_id "TSS1961"; p_id "P511";
1	Cufflinks	exon	53726459	53727663	.	-	.	gene_id "XLOC_001614"; transcript_id "TCONS_00002723"; exon_number "1"; gene_name "KIAA1524"; oId "CUFF.554.1"; nearest_ref "ENSBTAT00000022784"; class_code "j"; tss_id "TSS1961";
1	Cufflinks	exon	53728873	53729012	.	-	.	gene_id "XLOC_001614"; transcript_id "TCONS_00002723"; exon_number "2"; gene_name "KIAA1524"; oId "CUFF.554.1"; nearest_ref "ENSBTAT00000022784"; class_code "j"; tss_id "TSS1961";
1	Cufflinks	exon	53729963	53730045	.	-	.	gene_id "XLOC_001614"; transcript_id "TCONS_00002723"; exon_number "3"; gene_name "KIAA1524"; oId "CUFF.554.1"; nearest_ref "ENSBTAT00000022784"; class_code "j"; tss_id "TSS1961";
1	Cufflinks	exon	53730292	53730405	.	-	.	gene_id "XLOC_001614"; transcript_id "TCONS_00002723"; exon_number "4"; gene_name "KIAA1524"; oId "CUFF.554.1"; nearest_ref "ENSBTAT00000022784"; class_code "j"; tss_id "TSS1961";
1	Cufflinks	exon	53732543	53732739	.	-	.	gene_id "XLOC_001614"; transcript_id "TCONS_00002723"; exon_number "5"; gene_name "KIAA1524"; oId "CUFF.554.1"; nearest_ref "ENSBTAT00000022784"; class_code "j"; tss_id "TSS1961";
1	Cufflinks	exon	53734122	53734232	.	-	.	gene_id "XLOC_001614"; transcript_id "TCONS_00002723"; exon_number "6"; gene_name "KIAA1524"; oId "CUFF.554.1"; nearest_ref "ENSBTAT00000022784"; class_code "j"; tss_id "TSS1961";
1	Cufflinks	exon	53734324	53734398	.	-	.	gene_id "XLOC_001614"; transcript_id "TCONS_00002723"; exon_number "7"; gene_name "KIAA1524"; oId "CUFF.554.1"; nearest_ref "ENSBTAT00000022784"; class_code "j"; tss_id "TSS1961";
1	Cufflinks	exon	53735075	53735270	.	-	.	gene_id "XLOC_001614"; transcript_id "TCONS_00002723"; exon_number "8"; gene_name "KIAA1524"; oId "CUFF.554.1"; nearest_ref "ENSBTAT00000022784"; class_code "j"; tss_id "TSS1961";
1	Cufflinks	exon	53736487	53736605	.	-	.	gene_id "XLOC_001614"; transcript_id "TCONS_00002723"; exon_number "9"; gene_name "KIAA1524"; oId "CUFF.554.1"; nearest_ref "ENSBTAT00000022784"; class_code "j"; tss_id "TSS1961";
1	Cufflinks	exon	53738279	53738378	.	-	.	gene_id "XLOC_001614"; transcript_id "TCONS_00002723"; exon_number "10"; gene_name "KIAA1524"; oId "CUFF.554.1"; nearest_ref "ENSBTAT00000022784"; class_code "j"; tss_id "TSS1961";
1	Cufflinks	exon	53739701	53739842	.	-	.	gene_id "XLOC_001614"; transcript_id "TCONS_00002723"; exon_number "11"; gene_name "KIAA1524"; oId "CUFF.554.1"; nearest_ref "ENSBTAT00000022784"; class_code "j"; tss_id "TSS1961";
1	Cufflinks	exon	53741079	53741238	.	-	.	gene_id "XLOC_001614"; transcript_id "TCONS_00002723"; exon_number "12"; gene_name "KIAA1524"; oId "CUFF.554.1"; nearest_ref "ENSBTAT00000022784"; class_code "j"; tss_id "TSS1961";
1	Cufflinks	exon	53742644	53742831	.	-	.	gene_id "XLOC_001614"; transcript_id "TCONS_00002723"; exon_number "13"; gene_name "KIAA1524"; oId "CUFF.554.1"; nearest_ref "ENSBTAT00000022784"; class_code "j"; tss_id "TSS1961";
1	Cufflinks	exon	53745909	53745984	.	-	.	gene_id "XLOC_001614"; transcript_id "TCONS_00002723"; exon_number "14"; gene_name "KIAA1524"; oId "CUFF.554.1"; nearest_ref "ENSBTAT00000022784"; class_code "j"; tss_id "TSS1961";
1	Cufflinks	exon	53746358	53746503	.	-	.	gene_id "XLOC_001614"; transcript_id "TCONS_00002723"; exon_number "15"; gene_name "KIAA1524"; oId "CUFF.554.1"; nearest_ref "ENSBTAT00000022784"; class_code "j"; tss_id "TSS1961";
1	Cufflinks	exon	53746650	53746772	.	-	.	gene_id "XLOC_001614"; transcript_id "TCONS_00002723"; exon_number "16"; gene_name "KIAA1524"; oId "CUFF.554.1"; nearest_ref "ENSBTAT00000022784"; class_code "j"; tss_id "TSS1961";
1	Cufflinks	exon	53747918	53748014	.	-	.	gene_id "XLOC_001614"; transcript_id "TCONS_00002723"; exon_number "17"; gene_name "KIAA1524"; oId "CUFF.554.1"; nearest_ref "ENSBTAT00000022784"; class_code "j"; tss_id "TSS1961";
1	Cufflinks	exon	53749267	53749361	.	-	.	gene_id "XLOC_001614"; transcript_id "TCONS_00002723"; exon_number "18"; gene_name "KIAA1524"; oId "CUFF.554.1"; nearest_ref "ENSBTAT00000022784"; class_code "j"; tss_id "TSS1961";
1	Cufflinks	exon	53750536	53750648	.	-	.	gene_id "XLOC_001614"; transcript_id "TCONS_00002723"; exon_number "19"; gene_name "KIAA1524"; oId "CUFF.554.1"; nearest_ref "ENSBTAT00000022784"; class_code "j"; tss_id "TSS1961";
1	Cufflinks	exon	53751740	53751887	.	-	.	gene_id "XLOC_001614"; transcript_id "TCONS_00002723"; exon_number "20"; gene_name "KIAA1524"; oId "CUFF.554.1"; nearest_ref "ENSBTAT00000022784"; class_code "j"; tss_id "TSS1961";
1	Cufflinks	exon	53753669	53754034	.	-	.	gene_id "XLOC_001614"; transcript_id "TCONS_00002723"; exon_number "21"; gene_name "KIAA1524"; oId "CUFF.554.1"; nearest_ref "ENSBTAT00000022784"; class_code "j"; tss_id "TSS1961";
1	Cufflinks	exon	59399234	59400367	.	-	.	gene_id "XLOC_001659"; transcript_id "TCONS_00002800"; exon_number "1"; oId "CUFF.663.1"; class_code "u"; tss_id "TSS2019";
1	Cufflinks	exon	59750218	59751965	.	-	.	gene_id "XLOC_001669"; transcript_id "TCONS_00002811"; exon_number "1"; oId "CUFF.835.1"; class_code "u"; tss_id "TSS2030";
1	Cufflinks	exon	64791073	64792410	.	-	.	gene_id "XLOC_001761"; transcript_id "TCONS_00002905"; exon_number "1"; gene_name "ARHGAP31"; oId "CUFF.912.1"; nearest_ref "ENSBTAT00000000253"; class_code "x"; tss_id "TSS2123";
1	Cufflinks	exon	64798857	64800408	.	-	.	gene_id "XLOC_001767"; transcript_id "TCONS_00002911"; exon_number "1"; oId "CUFF.918.1"; class_code "u"; tss_id "TSS2129";
1	Cufflinks	exon	64801219	64802161	.	-	.	gene_id "XLOC_001769"; transcript_id "TCONS_00002913"; exon_number "1"; oId "CUFF.920.1"; class_code "u"; tss_id "TSS2131";
1	Cufflinks	exon	64996256	64997021	.	-	.	gene_id "XLOC_001779"; transcript_id "TCONS_00002928"; exon_number "1"; oId "CUFF.907.1"; class_code "u"; tss_id "TSS2143";
1	Cufflinks	exon	65991856	65993124	.	-	.	gene_id "XLOC_001800"; transcript_id "TCONS_00002953"; exon_number "1"; gene_name "RABL3"; oId "CUFF.958.2"; nearest_ref "ENSBTAT00000065681"; class_code "j"; tss_id "TSS2167";
1	Cufflinks	exon	65993723	65993761	.	-	.	gene_id "XLOC_001800"; transcript_id "TCONS_00002953"; exon_number "2"; gene_name "RABL3"; oId "CUFF.958.2"; nearest_ref "ENSBTAT00000065681"; class_code "j"; tss_id "TSS2167";
1	Cufflinks	exon	65996984	65997055	.	-	.	gene_id "XLOC_001800"; transcript_id "TCONS_00002953"; exon_number "3"; gene_name "RABL3"; oId "CUFF.958.2"; nearest_ref "ENSBTAT00000065681"; class_code "j"; tss_id "TSS2167";
1	Cufflinks	exon	66004040	66004154	.	-	.	gene_id "XLOC_001800"; transcript_id "TCONS_00002953"; exon_number "4"; gene_name "RABL3"; oId "CUFF.958.2"; nearest_ref "ENSBTAT00000065681"; class_code "j"; tss_id "TSS2167";
1	Cufflinks	exon	66008361	66008490	.	-	.	gene_id "XLOC_001800"; transcript_id "TCONS_00002953"; exon_number "5"; gene_name "RABL3"; oId "CUFF.958.2"; nearest_ref "ENSBTAT00000065681"; class_code "j"; tss_id "TSS2167";
1	Cufflinks	exon	66037830	66037857	.	-	.	gene_id "XLOC_001800"; transcript_id "TCONS_00002953"; exon_number "6"; gene_name "RABL3"; oId "CUFF.958.2"; nearest_ref "ENSBTAT00000065681"; class_code "j"; tss_id "TSS2167";
1	Cufflinks	exon	65991856	65993124	.	-	.	gene_id "XLOC_001800"; transcript_id "TCONS_00002954"; exon_number "1"; gene_name "RABL3"; oId "CUFF.958.1"; nearest_ref "ENSBTAT00000065681"; class_code "j"; tss_id "TSS2167";
1	Cufflinks	exon	65993723	65993761	.	-	.	gene_id "XLOC_001800"; transcript_id "TCONS_00002954"; exon_number "2"; gene_name "RABL3"; oId "CUFF.958.1"; nearest_ref "ENSBTAT00000065681"; class_code "j"; tss_id "TSS2167";
1	Cufflinks	exon	65996984	65997055	.	-	.	gene_id "XLOC_001800"; transcript_id "TCONS_00002954"; exon_number "3"; gene_name "RABL3"; oId "CUFF.958.1"; nearest_ref "ENSBTAT00000065681"; class_code "j"; tss_id "TSS2167";
1	Cufflinks	exon	66001524	66001674	.	-	.	gene_id "XLOC_001800"; transcript_id "TCONS_00002954"; exon_number "4"; gene_name "RABL3"; oId "CUFF.958.1"; nearest_ref "ENSBTAT00000065681"; class_code "j"; tss_id "TSS2167";
1	Cufflinks	exon	66004040	66004154	.	-	.	gene_id "XLOC_001800"; transcript_id "TCONS_00002954"; exon_number "5"; gene_name "RABL3"; oId "CUFF.958.1"; nearest_ref "ENSBTAT00000065681"; class_code "j"; tss_id "TSS2167";
1	Cufflinks	exon	66037830	66037870	.	-	.	gene_id "XLOC_001800"; transcript_id "TCONS_00002954"; exon_number "6"; gene_name "RABL3"; oId "CUFF.958.1"; nearest_ref "ENSBTAT00000065681"; class_code "j"; tss_id "TSS2167";
1	Cufflinks	exon	65993049	65993124	.	-	.	gene_id "XLOC_001800"; transcript_id "TCONS_00002956"; exon_number "1"; gene_name "RABL3"; oId "ENSBTAT00000065681"; nearest_ref "ENSBTAT00000065681"; class_code "="; tss_id "TSS2167"; p_id "P554";
1	Cufflinks	exon	65993723	65993761	.	-	.	gene_id "XLOC_001800"; transcript_id "TCONS_00002956"; exon_number "2"; gene_name "RABL3"; oId "ENSBTAT00000065681"; nearest_ref "ENSBTAT00000065681"; class_code "="; tss_id "TSS2167"; p_id "P554";
1	Cufflinks	exon	65996984	65997055	.	-	.	gene_id "XLOC_001800"; transcript_id "TCONS_00002956"; exon_number "3"; gene_name "RABL3"; oId "ENSBTAT00000065681"; nearest_ref "ENSBTAT00000065681"; class_code "="; tss_id "TSS2167"; p_id "P554";
1	Cufflinks	exon	66001524	66001674	.	-	.	gene_id "XLOC_001800"; transcript_id "TCONS_00002956"; exon_number "4"; gene_name "RABL3"; oId "ENSBTAT00000065681"; nearest_ref "ENSBTAT00000065681"; class_code "="; tss_id "TSS2167"; p_id "P554";
1	Cufflinks	exon	66004040	66004154	.	-	.	gene_id "XLOC_001800"; transcript_id "TCONS_00002956"; exon_number "5"; gene_name "RABL3"; oId "ENSBTAT00000065681"; nearest_ref "ENSBTAT00000065681"; class_code "="; tss_id "TSS2167"; p_id "P554";
1	Cufflinks	exon	66008361	66008490	.	-	.	gene_id "XLOC_001800"; transcript_id "TCONS_00002956"; exon_number "6"; gene_name "RABL3"; oId "ENSBTAT00000065681"; nearest_ref "ENSBTAT00000065681"; class_code "="; tss_id "TSS2167"; p_id "P554";
1	Cufflinks	exon	66037830	66037857	.	-	.	gene_id "XLOC_001800"; transcript_id "TCONS_00002956"; exon_number "7"; gene_name "RABL3"; oId "ENSBTAT00000065681"; nearest_ref "ENSBTAT00000065681"; class_code "="; tss_id "TSS2167"; p_id "P554";
1	Cufflinks	exon	67074191	67075935	.	-	.	gene_id "XLOC_001807"; transcript_id "TCONS_00002982"; exon_number "1"; oId "CUFF.1035.1"; class_code "u"; tss_id "TSS2178";
1	Cufflinks	exon	71689799	71690523	.	-	.	gene_id "XLOC_001875"; transcript_id "TCONS_00003128"; exon_number "1"; oId "CUFF.1207.1"; class_code "u"; tss_id "TSS2270";
1	Cufflinks	exon	71690832	71693005	.	-	.	gene_id "XLOC_001876"; transcript_id "TCONS_00003129"; exon_number "1"; oId "CUFF.1209.1"; class_code "u"; tss_id "TSS2271";
1	Cufflinks	exon	73470022	73470845	.	-	.	gene_id "XLOC_001900"; transcript_id "TCONS_00003183"; exon_number "1"; oId "CUFF.1245.1"; class_code "u"; tss_id "TSS2307";
1	Cufflinks	exon	73737179	73738118	.	-	.	gene_id "XLOC_001906"; transcript_id "TCONS_00003189"; exon_number "1"; oId "CUFF.1260.1"; class_code "u"; tss_id "TSS2313";
1	Cufflinks	exon	73739572	73739707	.	-	.	gene_id "XLOC_001906"; transcript_id "TCONS_00003189"; exon_number "2"; oId "CUFF.1260.1"; class_code "u"; tss_id "TSS2313";
1	Cufflinks	exon	74380640	74383949	.	-	.	gene_id "XLOC_001909"; transcript_id "TCONS_00003194"; exon_number "1"; gene_name "OPA1"; oId "CUFF.1458.12"; nearest_ref "ENSBTAT00000026013"; class_code "j"; tss_id "TSS2316";
1	Cufflinks	exon	74386123	74386194	.	-	.	gene_id "XLOC_001909"; transcript_id "TCONS_00003194"; exon_number "2"; gene_name "OPA1"; oId "CUFF.1458.12"; nearest_ref "ENSBTAT00000026013"; class_code "j"; tss_id "TSS2316";
1	Cufflinks	exon	74409052	74409162	.	-	.	gene_id "XLOC_001909"; transcript_id "TCONS_00003194"; exon_number "3"; gene_name "OPA1"; oId "CUFF.1458.12"; nearest_ref "ENSBTAT00000026013"; class_code "j"; tss_id "TSS2316";
1	Cufflinks	exon	74409640	74409733	.	-	.	gene_id "XLOC_001909"; transcript_id "TCONS_00003194"; exon_number "4"; gene_name "OPA1"; oId "CUFF.1458.12"; nearest_ref "ENSBTAT00000026013"; class_code "j"; tss_id "TSS2316";
1	Cufflinks	exon	74411942	74412058	.	-	.	gene_id "XLOC_001909"; transcript_id "TCONS_00003194"; exon_number "5"; gene_name "OPA1"; oId "CUFF.1458.12"; nearest_ref "ENSBTAT00000026013"; class_code "j"; tss_id "TSS2316";
1	Cufflinks	exon	74413839	74413979	.	-	.	gene_id "XLOC_001909"; transcript_id "TCONS_00003194"; exon_number "6"; gene_name "OPA1"; oId "CUFF.1458.12"; nearest_ref "ENSBTAT00000026013"; class_code "j"; tss_id "TSS2316";
1	Cufflinks	exon	74417761	74417840	.	-	.	gene_id "XLOC_001909"; transcript_id "TCONS_00003194"; exon_number "7"; gene_name "OPA1"; oId "CUFF.1458.12"; nearest_ref "ENSBTAT00000026013"; class_code "j"; tss_id "TSS2316";
1	Cufflinks	exon	74418306	74418414	.	-	.	gene_id "XLOC_001909"; transcript_id "TCONS_00003194"; exon_number "8"; gene_name "OPA1"; oId "CUFF.1458.12"; nearest_ref "ENSBTAT00000026013"; class_code "j"; tss_id "TSS2316";
1	Cufflinks	exon	74419695	74419847	.	-	.	gene_id "XLOC_001909"; transcript_id "TCONS_00003194"; exon_number "9"; gene_name "OPA1"; oId "CUFF.1458.12"; nearest_ref "ENSBTAT00000026013"; class_code "j"; tss_id "TSS2316";
1	Cufflinks	exon	74421788	74421953	.	-	.	gene_id "XLOC_001909"; transcript_id "TCONS_00003194"; exon_number "10"; gene_name "OPA1"; oId "CUFF.1458.12"; nearest_ref "ENSBTAT00000026013"; class_code "j"; tss_id "TSS2316";
1	Cufflinks	exon	74430478	74430554	.	-	.	gene_id "XLOC_001909"; transcript_id "TCONS_00003194"; exon_number "11"; gene_name "OPA1"; oId "CUFF.1458.12"; nearest_ref "ENSBTAT00000026013"; class_code "j"; tss_id "TSS2316";
1	Cufflinks	exon	74431313	74431377	.	-	.	gene_id "XLOC_001909"; transcript_id "TCONS_00003194"; exon_number "12"; gene_name "OPA1"; oId "CUFF.1458.12"; nearest_ref "ENSBTAT00000026013"; class_code "j"; tss_id "TSS2316";
1	Cufflinks	exon	74432535	74432650	.	-	.	gene_id "XLOC_001909"; transcript_id "TCONS_00003194"; exon_number "13"; gene_name "OPA1"; oId "CUFF.1458.12"; nearest_ref "ENSBTAT00000026013"; class_code "j"; tss_id "TSS2316";
1	Cufflinks	exon	74433824	74433896	.	-	.	gene_id "XLOC_001909"; transcript_id "TCONS_00003194"; exon_number "14"; gene_name "OPA1"; oId "CUFF.1458.12"; nearest_ref "ENSBTAT00000026013"; class_code "j"; tss_id "TSS2316";
1	Cufflinks	exon	74433983	74434055	.	-	.	gene_id "XLOC_001909"; transcript_id "TCONS_00003194"; exon_number "15"; gene_name "OPA1"; oId "CUFF.1458.12"; nearest_ref "ENSBTAT00000026013"; class_code "j"; tss_id "TSS2316";
1	Cufflinks	exon	74436934	74437064	.	-	.	gene_id "XLOC_001909"; transcript_id "TCONS_00003194"; exon_number "16"; gene_name "OPA1"; oId "CUFF.1458.12"; nearest_ref "ENSBTAT00000026013"; class_code "j"; tss_id "TSS2316";
1	Cufflinks	exon	74437617	74437716	.	-	.	gene_id "XLOC_001909"; transcript_id "TCONS_00003194"; exon_number "17"; gene_name "OPA1"; oId "CUFF.1458.12"; nearest_ref "ENSBTAT00000026013"; class_code "j"; tss_id "TSS2316";
1	Cufflinks	exon	74437799	74437870	.	-	.	gene_id "XLOC_001909"; transcript_id "TCONS_00003194"; exon_number "18"; gene_name "OPA1"; oId "CUFF.1458.12"; nearest_ref "ENSBTAT00000026013"; class_code "j"; tss_id "TSS2316";
1	Cufflinks	exon	74438202	74438276	.	-	.	gene_id "XLOC_001909"; transcript_id "TCONS_00003194"; exon_number "19"; gene_name "OPA1"; oId "CUFF.1458.12"; nearest_ref "ENSBTAT00000026013"; class_code "j"; tss_id "TSS2316";
1	Cufflinks	exon	74438403	74438483	.	-	.	gene_id "XLOC_001909"; transcript_id "TCONS_00003194"; exon_number "20"; gene_name "OPA1"; oId "CUFF.1458.12"; nearest_ref "ENSBTAT00000026013"; class_code "j"; tss_id "TSS2316";
1	Cufflinks	exon	74439186	74439299	.	-	.	gene_id "XLOC_001909"; transcript_id "TCONS_00003194"; exon_number "21"; gene_name "OPA1"; oId "CUFF.1458.12"; nearest_ref "ENSBTAT00000026013"; class_code "j"; tss_id "TSS2316";
1	Cufflinks	exon	74439921	74440007	.	-	.	gene_id "XLOC_001909"; transcript_id "TCONS_00003194"; exon_number "22"; gene_name "OPA1"; oId "CUFF.1458.12"; nearest_ref "ENSBTAT00000026013"; class_code "j"; tss_id "TSS2316";
1	Cufflinks	exon	74442039	74442143	.	-	.	gene_id "XLOC_001909"; transcript_id "TCONS_00003194"; exon_number "23"; gene_name "OPA1"; oId "CUFF.1458.12"; nearest_ref "ENSBTAT00000026013"; class_code "j"; tss_id "TSS2316";
1	Cufflinks	exon	74445009	74445062	.	-	.	gene_id "XLOC_001909"; transcript_id "TCONS_00003194"; exon_number "24"; gene_name "OPA1"; oId "CUFF.1458.12"; nearest_ref "ENSBTAT00000026013"; class_code "j"; tss_id "TSS2316";
1	Cufflinks	exon	74449858	74449968	.	-	.	gene_id "XLOC_001909"; transcript_id "TCONS_00003194"; exon_number "25"; gene_name "OPA1"; oId "CUFF.1458.12"; nearest_ref "ENSBTAT00000026013"; class_code "j"; tss_id "TSS2316";
1	Cufflinks	exon	74450107	74450251	.	-	.	gene_id "XLOC_001909"; transcript_id "TCONS_00003194"; exon_number "26"; gene_name "OPA1"; oId "CUFF.1458.12"; nearest_ref "ENSBTAT00000026013"; class_code "j"; tss_id "TSS2316";
1	Cufflinks	exon	74380640	74383949	.	-	.	gene_id "XLOC_001909"; transcript_id "TCONS_00003195"; exon_number "1"; gene_name "OPA1"; oId "CUFF.1458.10"; nearest_ref "ENSBTAT00000026013"; class_code "j"; tss_id "TSS2317";
1	Cufflinks	exon	74386123	74386194	.	-	.	gene_id "XLOC_001909"; transcript_id "TCONS_00003195"; exon_number "2"; gene_name "OPA1"; oId "CUFF.1458.10"; nearest_ref "ENSBTAT00000026013"; class_code "j"; tss_id "TSS2317";
1	Cufflinks	exon	74409052	74409162	.	-	.	gene_id "XLOC_001909"; transcript_id "TCONS_00003195"; exon_number "3"; gene_name "OPA1"; oId "CUFF.1458.10"; nearest_ref "ENSBTAT00000026013"; class_code "j"; tss_id "TSS2317";
1	Cufflinks	exon	74409640	74409733	.	-	.	gene_id "XLOC_001909"; transcript_id "TCONS_00003195"; exon_number "4"; gene_name "OPA1"; oId "CUFF.1458.10"; nearest_ref "ENSBTAT00000026013"; class_code "j"; tss_id "TSS2317";
1	Cufflinks	exon	74411942	74412058	.	-	.	gene_id "XLOC_001909"; transcript_id "TCONS_00003195"; exon_number "5"; gene_name "OPA1"; oId "CUFF.1458.10"; nearest_ref "ENSBTAT00000026013"; class_code "j"; tss_id "TSS2317";
1	Cufflinks	exon	74413839	74413979	.	-	.	gene_id "XLOC_001909"; transcript_id "TCONS_00003195"; exon_number "6"; gene_name "OPA1"; oId "CUFF.1458.10"; nearest_ref "ENSBTAT00000026013"; class_code "j"; tss_id "TSS2317";
1	Cufflinks	exon	74417761	74417840	.	-	.	gene_id "XLOC_001909"; transcript_id "TCONS_00003195"; exon_number "7"; gene_name "OPA1"; oId "CUFF.1458.10"; nearest_ref "ENSBTAT00000026013"; class_code "j"; tss_id "TSS2317";
1	Cufflinks	exon	74418306	74418414	.	-	.	gene_id "XLOC_001909"; transcript_id "TCONS_00003195"; exon_number "8"; gene_name "OPA1"; oId "CUFF.1458.10"; nearest_ref "ENSBTAT00000026013"; class_code "j"; tss_id "TSS2317";
1	Cufflinks	exon	74419695	74419847	.	-	.	gene_id "XLOC_001909"; transcript_id "TCONS_00003195"; exon_number "9"; gene_name "OPA1"; oId "CUFF.1458.10"; nearest_ref "ENSBTAT00000026013"; class_code "j"; tss_id "TSS2317";
1	Cufflinks	exon	74421788	74421953	.	-	.	gene_id "XLOC_001909"; transcript_id "TCONS_00003195"; exon_number "10"; gene_name "OPA1"; oId "CUFF.1458.10"; nearest_ref "ENSBTAT00000026013"; class_code "j"; tss_id "TSS2317";
1	Cufflinks	exon	74430478	74430554	.	-	.	gene_id "XLOC_001909"; transcript_id "TCONS_00003195"; exon_number "11"; gene_name "OPA1"; oId "CUFF.1458.10"; nearest_ref "ENSBTAT00000026013"; class_code "j"; tss_id "TSS2317";
1	Cufflinks	exon	74431313	74431377	.	-	.	gene_id "XLOC_001909"; transcript_id "TCONS_00003195"; exon_number "12"; gene_name "OPA1"; oId "CUFF.1458.10"; nearest_ref "ENSBTAT00000026013"; class_code "j"; tss_id "TSS2317";
1	Cufflinks	exon	74432535	74432650	.	-	.	gene_id "XLOC_001909"; transcript_id "TCONS_00003195"; exon_number "13"; gene_name "OPA1"; oId "CUFF.1458.10"; nearest_ref "ENSBTAT00000026013"; class_code "j"; tss_id "TSS2317";
1	Cufflinks	exon	74433824	74433896	.	-	.	gene_id "XLOC_001909"; transcript_id "TCONS_00003195"; exon_number "14"; gene_name "OPA1"; oId "CUFF.1458.10"; nearest_ref "ENSBTAT00000026013"; class_code "j"; tss_id "TSS2317";
1	Cufflinks	exon	74433983	74434055	.	-	.	gene_id "XLOC_001909"; transcript_id "TCONS_00003195"; exon_number "15"; gene_name "OPA1"; oId "CUFF.1458.10"; nearest_ref "ENSBTAT00000026013"; class_code "j"; tss_id "TSS2317";
1	Cufflinks	exon	74436934	74437064	.	-	.	gene_id "XLOC_001909"; transcript_id "TCONS_00003195"; exon_number "16"; gene_name "OPA1"; oId "CUFF.1458.10"; nearest_ref "ENSBTAT00000026013"; class_code "j"; tss_id "TSS2317";
1	Cufflinks	exon	74437617	74437716	.	-	.	gene_id "XLOC_001909"; transcript_id "TCONS_00003195"; exon_number "17"; gene_name "OPA1"; oId "CUFF.1458.10"; nearest_ref "ENSBTAT00000026013"; class_code "j"; tss_id "TSS2317";
1	Cufflinks	exon	74437799	74437870	.	-	.	gene_id "XLOC_001909"; transcript_id "TCONS_00003195"; exon_number "18"; gene_name "OPA1"; oId "CUFF.1458.10"; nearest_ref "ENSBTAT00000026013"; class_code "j"; tss_id "TSS2317";
1	Cufflinks	exon	74438202	74438276	.	-	.	gene_id "XLOC_001909"; transcript_id "TCONS_00003195"; exon_number "19"; gene_name "OPA1"; oId "CUFF.1458.10"; nearest_ref "ENSBTAT00000026013"; class_code "j"; tss_id "TSS2317";
1	Cufflinks	exon	74438403	74438483	.	-	.	gene_id "XLOC_001909"; transcript_id "TCONS_00003195"; exon_number "20"; gene_name "OPA1"; oId "CUFF.1458.10"; nearest_ref "ENSBTAT00000026013"; class_code "j"; tss_id "TSS2317";
1	Cufflinks	exon	74439186	74439299	.	-	.	gene_id "XLOC_001909"; transcript_id "TCONS_00003195"; exon_number "21"; gene_name "OPA1"; oId "CUFF.1458.10"; nearest_ref "ENSBTAT00000026013"; class_code "j"; tss_id "TSS2317";
1	Cufflinks	exon	74439921	74440007	.	-	.	gene_id "XLOC_001909"; transcript_id "TCONS_00003195"; exon_number "22"; gene_name "OPA1"; oId "CUFF.1458.10"; nearest_ref "ENSBTAT00000026013"; class_code "j"; tss_id "TSS2317";
1	Cufflinks	exon	74442039	74442143	.	-	.	gene_id "XLOC_001909"; transcript_id "TCONS_00003195"; exon_number "23"; gene_name "OPA1"; oId "CUFF.1458.10"; nearest_ref "ENSBTAT00000026013"; class_code "j"; tss_id "TSS2317";
1	Cufflinks	exon	74445009	74445062	.	-	.	gene_id "XLOC_001909"; transcript_id "TCONS_00003195"; exon_number "24"; gene_name "OPA1"; oId "CUFF.1458.10"; nearest_ref "ENSBTAT00000026013"; class_code "j"; tss_id "TSS2317";
1	Cufflinks	exon	74449858	74449968	.	-	.	gene_id "XLOC_001909"; transcript_id "TCONS_00003195"; exon_number "25"; gene_name "OPA1"; oId "CUFF.1458.10"; nearest_ref "ENSBTAT00000026013"; class_code "j"; tss_id "TSS2317";
1	Cufflinks	exon	74458731	74458798	.	-	.	gene_id "XLOC_001909"; transcript_id "TCONS_00003195"; exon_number "26"; gene_name "OPA1"; oId "CUFF.1458.10"; nearest_ref "ENSBTAT00000026013"; class_code "j"; tss_id "TSS2317";
1	Cufflinks	exon	74459461	74459514	.	-	.	gene_id "XLOC_001909"; transcript_id "TCONS_00003195"; exon_number "27"; gene_name "OPA1"; oId "CUFF.1458.10"; nearest_ref "ENSBTAT00000026013"; class_code "j"; tss_id "TSS2317";
1	Cufflinks	exon	74460150	74460257	.	-	.	gene_id "XLOC_001909"; transcript_id "TCONS_00003195"; exon_number "28"; gene_name "OPA1"; oId "CUFF.1458.10"; nearest_ref "ENSBTAT00000026013"; class_code "j"; tss_id "TSS2317";
1	Cufflinks	exon	74461883	74461979	.	-	.	gene_id "XLOC_001909"; transcript_id "TCONS_00003195"; exon_number "29"; gene_name "OPA1"; oId "CUFF.1458.10"; nearest_ref "ENSBTAT00000026013"; class_code "j"; tss_id "TSS2317";
1	Cufflinks	exon	74462639	74462957	.	-	.	gene_id "XLOC_001909"; transcript_id "TCONS_00003195"; exon_number "30"; gene_name "OPA1"; oId "CUFF.1458.10"; nearest_ref "ENSBTAT00000026013"; class_code "j"; tss_id "TSS2317";
1	Cufflinks	exon	74467267	74467439	.	-	.	gene_id "XLOC_001909"; transcript_id "TCONS_00003195"; exon_number "31"; gene_name "OPA1"; oId "CUFF.1458.10"; nearest_ref "ENSBTAT00000026013"; class_code "j"; tss_id "TSS2317";
1	Cufflinks	exon	74380640	74383176	.	-	.	gene_id "XLOC_001909"; transcript_id "TCONS_00003196"; exon_number "1"; gene_name "OPA1"; oId "CUFF.1458.8"; nearest_ref "ENSBTAT00000026013"; class_code "j"; tss_id "TSS2317";
1	Cufflinks	exon	74383429	74383949	.	-	.	gene_id "XLOC_001909"; transcript_id "TCONS_00003196"; exon_number "2"; gene_name "OPA1"; oId "CUFF.1458.8"; nearest_ref "ENSBTAT00000026013"; class_code "j"; tss_id "TSS2317";
1	Cufflinks	exon	74386123	74386194	.	-	.	gene_id "XLOC_001909"; transcript_id "TCONS_00003196"; exon_number "3"; gene_name "OPA1"; oId "CUFF.1458.8"; nearest_ref "ENSBTAT00000026013"; class_code "j"; tss_id "TSS2317";
1	Cufflinks	exon	74409052	74409162	.	-	.	gene_id "XLOC_001909"; transcript_id "TCONS_00003196"; exon_number "4"; gene_name "OPA1"; oId "CUFF.1458.8"; nearest_ref "ENSBTAT00000026013"; class_code "j"; tss_id "TSS2317";
1	Cufflinks	exon	74409640	74409733	.	-	.	gene_id "XLOC_001909"; transcript_id "TCONS_00003196"; exon_number "5"; gene_name "OPA1"; oId "CUFF.1458.8"; nearest_ref "ENSBTAT00000026013"; class_code "j"; tss_id "TSS2317";
1	Cufflinks	exon	74411942	74412058	.	-	.	gene_id "XLOC_001909"; transcript_id "TCONS_00003196"; exon_number "6"; gene_name "OPA1"; oId "CUFF.1458.8"; nearest_ref "ENSBTAT00000026013"; class_code "j"; tss_id "TSS2317";
1	Cufflinks	exon	74413839	74413979	.	-	.	gene_id "XLOC_001909"; transcript_id "TCONS_00003196"; exon_number "7"; gene_name "OPA1"; oId "CUFF.1458.8"; nearest_ref "ENSBTAT00000026013"; class_code "j"; tss_id "TSS2317";
1	Cufflinks	exon	74417761	74417840	.	-	.	gene_id "XLOC_001909"; transcript_id "TCONS_00003196"; exon_number "8"; gene_name "OPA1"; oId "CUFF.1458.8"; nearest_ref "ENSBTAT00000026013"; class_code "j"; tss_id "TSS2317";
1	Cufflinks	exon	74418306	74418414	.	-	.	gene_id "XLOC_001909"; transcript_id "TCONS_00003196"; exon_number "9"; gene_name "OPA1"; oId "CUFF.1458.8"; nearest_ref "ENSBTAT00000026013"; class_code "j"; tss_id "TSS2317";
1	Cufflinks	exon	74419695	74419847	.	-	.	gene_id "XLOC_001909"; transcript_id "TCONS_00003196"; exon_number "10"; gene_name "OPA1"; oId "CUFF.1458.8"; nearest_ref "ENSBTAT00000026013"; class_code "j"; tss_id "TSS2317";
1	Cufflinks	exon	74421788	74421953	.	-	.	gene_id "XLOC_001909"; transcript_id "TCONS_00003196"; exon_number "11"; gene_name "OPA1"; oId "CUFF.1458.8"; nearest_ref "ENSBTAT00000026013"; class_code "j"; tss_id "TSS2317";
1	Cufflinks	exon	74430478	74430554	.	-	.	gene_id "XLOC_001909"; transcript_id "TCONS_00003196"; exon_number "12"; gene_name "OPA1"; oId "CUFF.1458.8"; nearest_ref "ENSBTAT00000026013"; class_code "j"; tss_id "TSS2317";
1	Cufflinks	exon	74431313	74431377	.	-	.	gene_id "XLOC_001909"; transcript_id "TCONS_00003196"; exon_number "13"; gene_name "OPA1"; oId "CUFF.1458.8"; nearest_ref "ENSBTAT00000026013"; class_code "j"; tss_id "TSS2317";
1	Cufflinks	exon	74432535	74432650	.	-	.	gene_id "XLOC_001909"; transcript_id "TCONS_00003196"; exon_number "14"; gene_name "OPA1"; oId "CUFF.1458.8"; nearest_ref "ENSBTAT00000026013"; class_code "j"; tss_id "TSS2317";
1	Cufflinks	exon	74433824	74433896	.	-	.	gene_id "XLOC_001909"; transcript_id "TCONS_00003196"; exon_number "15"; gene_name "OPA1"; oId "CUFF.1458.8"; nearest_ref "ENSBTAT00000026013"; class_code "j"; tss_id "TSS2317";
1	Cufflinks	exon	74433983	74434055	.	-	.	gene_id "XLOC_001909"; transcript_id "TCONS_00003196"; exon_number "16"; gene_name "OPA1"; oId "CUFF.1458.8"; nearest_ref "ENSBTAT00000026013"; class_code "j"; tss_id "TSS2317";
1	Cufflinks	exon	74436934	74437064	.	-	.	gene_id "XLOC_001909"; transcript_id "TCONS_00003196"; exon_number "17"; gene_name "OPA1"; oId "CUFF.1458.8"; nearest_ref "ENSBTAT00000026013"; class_code "j"; tss_id "TSS2317";
1	Cufflinks	exon	74437617	74437716	.	-	.	gene_id "XLOC_001909"; transcript_id "TCONS_00003196"; exon_number "18"; gene_name "OPA1"; oId "CUFF.1458.8"; nearest_ref "ENSBTAT00000026013"; class_code "j"; tss_id "TSS2317";
1	Cufflinks	exon	74437799	74437870	.	-	.	gene_id "XLOC_001909"; transcript_id "TCONS_00003196"; exon_number "19"; gene_name "OPA1"; oId "CUFF.1458.8"; nearest_ref "ENSBTAT00000026013"; class_code "j"; tss_id "TSS2317";
1	Cufflinks	exon	74438202	74438276	.	-	.	gene_id "XLOC_001909"; transcript_id "TCONS_00003196"; exon_number "20"; gene_name "OPA1"; oId "CUFF.1458.8"; nearest_ref "ENSBTAT00000026013"; class_code "j"; tss_id "TSS2317";
1	Cufflinks	exon	74438403	74438483	.	-	.	gene_id "XLOC_001909"; transcript_id "TCONS_00003196"; exon_number "21"; gene_name "OPA1"; oId "CUFF.1458.8"; nearest_ref "ENSBTAT00000026013"; class_code "j"; tss_id "TSS2317";
1	Cufflinks	exon	74439186	74439299	.	-	.	gene_id "XLOC_001909"; transcript_id "TCONS_00003196"; exon_number "22"; gene_name "OPA1"; oId "CUFF.1458.8"; nearest_ref "ENSBTAT00000026013"; class_code "j"; tss_id "TSS2317";
1	Cufflinks	exon	74439921	74440007	.	-	.	gene_id "XLOC_001909"; transcript_id "TCONS_00003196"; exon_number "23"; gene_name "OPA1"; oId "CUFF.1458.8"; nearest_ref "ENSBTAT00000026013"; class_code "j"; tss_id "TSS2317";
1	Cufflinks	exon	74442039	74442143	.	-	.	gene_id "XLOC_001909"; transcript_id "TCONS_00003196"; exon_number "24"; gene_name "OPA1"; oId "CUFF.1458.8"; nearest_ref "ENSBTAT00000026013"; class_code "j"; tss_id "TSS2317";
1	Cufflinks	exon	74445009	74445062	.	-	.	gene_id "XLOC_001909"; transcript_id "TCONS_00003196"; exon_number "25"; gene_name "OPA1"; oId "CUFF.1458.8"; nearest_ref "ENSBTAT00000026013"; class_code "j"; tss_id "TSS2317";
1	Cufflinks	exon	74449858	74449968	.	-	.	gene_id "XLOC_001909"; transcript_id "TCONS_00003196"; exon_number "26"; gene_name "OPA1"; oId "CUFF.1458.8"; nearest_ref "ENSBTAT00000026013"; class_code "j"; tss_id "TSS2317";
1	Cufflinks	exon	74458731	74458798	.	-	.	gene_id "XLOC_001909"; transcript_id "TCONS_00003196"; exon_number "27"; gene_name "OPA1"; oId "CUFF.1458.8"; nearest_ref "ENSBTAT00000026013"; class_code "j"; tss_id "TSS2317";
1	Cufflinks	exon	74459461	74459514	.	-	.	gene_id "XLOC_001909"; transcript_id "TCONS_00003196"; exon_number "28"; gene_name "OPA1"; oId "CUFF.1458.8"; nearest_ref "ENSBTAT00000026013"; class_code "j"; tss_id "TSS2317";
1	Cufflinks	exon	74460150	74460257	.	-	.	gene_id "XLOC_001909"; transcript_id "TCONS_00003196"; exon_number "29"; gene_name "OPA1"; oId "CUFF.1458.8"; nearest_ref "ENSBTAT00000026013"; class_code "j"; tss_id "TSS2317";
1	Cufflinks	exon	74461883	74461979	.	-	.	gene_id "XLOC_001909"; transcript_id "TCONS_00003196"; exon_number "30"; gene_name "OPA1"; oId "CUFF.1458.8"; nearest_ref "ENSBTAT00000026013"; class_code "j"; tss_id "TSS2317";
1	Cufflinks	exon	74462639	74462957	.	-	.	gene_id "XLOC_001909"; transcript_id "TCONS_00003196"; exon_number "31"; gene_name "OPA1"; oId "CUFF.1458.8"; nearest_ref "ENSBTAT00000026013"; class_code "j"; tss_id "TSS2317";
1	Cufflinks	exon	74467267	74467447	.	-	.	gene_id "XLOC_001909"; transcript_id "TCONS_00003196"; exon_number "32"; gene_name "OPA1"; oId "CUFF.1458.8"; nearest_ref "ENSBTAT00000026013"; class_code "j"; tss_id "TSS2317";
1	Cufflinks	exon	74380640	74383949	.	-	.	gene_id "XLOC_001909"; transcript_id "TCONS_00003197"; exon_number "1"; gene_name "OPA1"; oId "CUFF.1458.3"; nearest_ref "ENSBTAT00000026013"; class_code "j"; tss_id "TSS2317";
1	Cufflinks	exon	74386123	74386194	.	-	.	gene_id "XLOC_001909"; transcript_id "TCONS_00003197"; exon_number "2"; gene_name "OPA1"; oId "CUFF.1458.3"; nearest_ref "ENSBTAT00000026013"; class_code "j"; tss_id "TSS2317";
1	Cufflinks	exon	74409052	74409162	.	-	.	gene_id "XLOC_001909"; transcript_id "TCONS_00003197"; exon_number "3"; gene_name "OPA1"; oId "CUFF.1458.3"; nearest_ref "ENSBTAT00000026013"; class_code "j"; tss_id "TSS2317";
1	Cufflinks	exon	74409640	74409733	.	-	.	gene_id "XLOC_001909"; transcript_id "TCONS_00003197"; exon_number "4"; gene_name "OPA1"; oId "CUFF.1458.3"; nearest_ref "ENSBTAT00000026013"; class_code "j"; tss_id "TSS2317";
1	Cufflinks	exon	74411942	74412058	.	-	.	gene_id "XLOC_001909"; transcript_id "TCONS_00003197"; exon_number "5"; gene_name "OPA1"; oId "CUFF.1458.3"; nearest_ref "ENSBTAT00000026013"; class_code "j"; tss_id "TSS2317";
1	Cufflinks	exon	74413839	74413979	.	-	.	gene_id "XLOC_001909"; transcript_id "TCONS_00003197"; exon_number "6"; gene_name "OPA1"; oId "CUFF.1458.3"; nearest_ref "ENSBTAT00000026013"; class_code "j"; tss_id "TSS2317";
1	Cufflinks	exon	74417761	74417840	.	-	.	gene_id "XLOC_001909"; transcript_id "TCONS_00003197"; exon_number "7"; gene_name "OPA1"; oId "CUFF.1458.3"; nearest_ref "ENSBTAT00000026013"; class_code "j"; tss_id "TSS2317";
1	Cufflinks	exon	74418306	74418414	.	-	.	gene_id "XLOC_001909"; transcript_id "TCONS_00003197"; exon_number "8"; gene_name "OPA1"; oId "CUFF.1458.3"; nearest_ref "ENSBTAT00000026013"; class_code "j"; tss_id "TSS2317";
1	Cufflinks	exon	74419695	74419847	.	-	.	gene_id "XLOC_001909"; transcript_id "TCONS_00003197"; exon_number "9"; gene_name "OPA1"; oId "CUFF.1458.3"; nearest_ref "ENSBTAT00000026013"; class_code "j"; tss_id "TSS2317";
1	Cufflinks	exon	74421788	74421953	.	-	.	gene_id "XLOC_001909"; transcript_id "TCONS_00003197"; exon_number "10"; gene_name "OPA1"; oId "CUFF.1458.3"; nearest_ref "ENSBTAT00000026013"; class_code "j"; tss_id "TSS2317";
1	Cufflinks	exon	74430478	74430554	.	-	.	gene_id "XLOC_001909"; transcript_id "TCONS_00003197"; exon_number "11"; gene_name "OPA1"; oId "CUFF.1458.3"; nearest_ref "ENSBTAT00000026013"; class_code "j"; tss_id "TSS2317";
1	Cufflinks	exon	74431313	74431377	.	-	.	gene_id "XLOC_001909"; transcript_id "TCONS_00003197"; exon_number "12"; gene_name "OPA1"; oId "CUFF.1458.3"; nearest_ref "ENSBTAT00000026013"; class_code "j"; tss_id "TSS2317";
1	Cufflinks	exon	74432535	74432650	.	-	.	gene_id "XLOC_001909"; transcript_id "TCONS_00003197"; exon_number "13"; gene_name "OPA1"; oId "CUFF.1458.3"; nearest_ref "ENSBTAT00000026013"; class_code "j"; tss_id "TSS2317";
1	Cufflinks	exon	74433824	74433896	.	-	.	gene_id "XLOC_001909"; transcript_id "TCONS_00003197"; exon_number "14"; gene_name "OPA1"; oId "CUFF.1458.3"; nearest_ref "ENSBTAT00000026013"; class_code "j"; tss_id "TSS2317";
1	Cufflinks	exon	74433983	74434055	.	-	.	gene_id "XLOC_001909"; transcript_id "TCONS_00003197"; exon_number "15"; gene_name "OPA1"; oId "CUFF.1458.3"; nearest_ref "ENSBTAT00000026013"; class_code "j"; tss_id "TSS2317";
1	Cufflinks	exon	74436934	74437064	.	-	.	gene_id "XLOC_001909"; transcript_id "TCONS_00003197"; exon_number "16"; gene_name "OPA1"; oId "CUFF.1458.3"; nearest_ref "ENSBTAT00000026013"; class_code "j"; tss_id "TSS2317";
1	Cufflinks	exon	74437617	74437716	.	-	.	gene_id "XLOC_001909"; transcript_id "TCONS_00003197"; exon_number "17"; gene_name "OPA1"; oId "CUFF.1458.3"; nearest_ref "ENSBTAT00000026013"; class_code "j"; tss_id "TSS2317";
1	Cufflinks	exon	74437799	74437870	.	-	.	gene_id "XLOC_001909"; transcript_id "TCONS_00003197"; exon_number "18"; gene_name "OPA1"; oId "CUFF.1458.3"; nearest_ref "ENSBTAT00000026013"; class_code "j"; tss_id "TSS2317";
[truncated: 25,508 more rows]

## Sheet: Known LncRNA Read counts
Additional File 1c: Identified lncRNA read counts, known lncRNAs
[truncated: 326 more rows]

## Sheet: Known lncRNA gtf file
Additional File 1d: Identified known lncRNAs, gtf file
[truncated: 3,775 more rows]

[truncated: 1 more sheets: Sheet1]
