# Supplementary material for: Transcriptome Analysis of Long Non-Coding RNA in the Bovine Mammary Gland Following Dietary Supplementation with Linseed and Safflower Oil<strong> </strong>
Source: Preprints.org preprint supplement (doi:10.20944/preprints201810.0185.v1), 2018-10-09
Supplement: Supplementary file 3 [file Supplementary File 3_Transcript number distribution.xlsx]

## Sheet: 3a Length dist of lncRNA
Additional file 3a: Length distribution of identified lncRNAs
lenght (bp)	# of lncRNA		Total	% of total
	known lncRNA	novel lncRNA
0-199	1	0	1	0.0202
200-999	70	2165	2235	45.106
1000-2499	131	1729	1860	37.538
2500-4999	77	460	537	10.838
5000-9999	39	204	243	4.9041
>9999	7	72	79	1.5943
Total	325	4630	4955

## Sheet: 3b_Transcript_per_lncRNA_mRNA
Additional file b: Transcript distribution of identified lncRNAs compared with transcript distribution of protein coding genes
(a) LncRNA				(b) protein coding genes (mRNA)
Number of transcripts	Freq			Number of transcripts	Freq
1	4220	85.1665		1	2576	23.4715
2	270	5.44904		2	2111	19.2346
3	136	2.7447		3	1589	14.4784
4	88	1.77598		4	1176	10.7153
5	64	1.29162		5	811	7.38952
6	47	0.948537		6	565	5.14806
7	34	0.686176		7	476	4.33713
8	26	0.524723		8	352	3.20729
9	6	0.12109		9	246	2.24146
10	14	0.282543		10	172	1.5672
11	7	0.141271		11	149	1.35763
12	7	0.141271		12	120	1.09339
13	5	0.100908		13	106	0.965831
14	8	0.161453		14	87	0.792711
15	3	0.0605449		15	65	0.592255
16	3	0.0605449		16	57	0.519362
17	1	0.0201816		17	52	0.473804
18	1	0.0201816		18	34	0.309795
19	2	0.0403633		19	32	0.291572
21	2	0.0403633		20	31	0.28246
23	1	0.0201816		21	18	0.164009
26	2	0.0403633		22	19	0.173121
28	1	0.0201816		23	20	0.182232
30	1	0.0201816		24	10	0.0911162
31	1	0.0201816		25	14	0.127563
32	1	0.0201816		26	6	0.0546697
39	1	0.0201816		27	9	0.0820046
49	1	0.0201816		28	7	0.0637813
75	1	0.0201816		29	6	0.0546697
82	1	0.0201816		30	4	0.0364465
	4955			31	6	0.0546697
				32	4	0.0364465
				33	4	0.0364465
				34	4	0.0364465
				35	5	0.0455581
				36	2	0.0182232
				37	2	0.0182232
				38	3	0.0273349
				39	1	0.00911162
				40	3	0.0273349
				41	3	0.0273349
				42	1	0.00911162
				43	2	0.0182232
				44	1	0.00911162
				45	3	0.0273349
				47	1	0.00911162
				48	1	0.00911162
				49	1	0.00911162
				53	1	0.00911162
				59	1	0.00911162
				66	2	0.0182232
				71	2	0.0182232
				81	1	0.00911162
				89	1	0.00911162
					10975

## Sheet: 3c_Class distibution of lncR
Addtional files 3d: Class distribution of LncRNA transcripts
Description	Class	Number of transcripts	% of total
Sense transcripts in upstream of mRNA (within 1 kb)	1	175	2.258
Anti-sense transcripts in upstream of mRNA (within 1kb):	2	502	6.478
Sense transcripts in downstream of mRNA (within 1kb)	3	22	0.284
Anti-sense transcripts in downstream of mRNA (within 1kb)	4	97	1.252
Intergenic lncRNA (located at least >1KB away from nearest gene)	5	4834	62.382
Exonic lncRNA overlapping mRNA in same strand	6	1189	15.344
Exonic lncRNA overlapping mRNA in opposite strand	7	660	8.517
Intronic lncRNA transcripts in sense strand as mRNA	8	28	0.361
Intronic lncRNA transcripts in antisense strand of mRNA	9	140	1.807
Transcripts overlapping mRNA in same strand but not exonic or intronic	10	23	0.297
Transcripts overlapping mRNA in opposite strand but not exonic or intronic	11	79	1.019
Total		7749
