# Supplementary material for: Transcriptome Analysis of Long Non-Coding RNA in the Bovine Mammary Gland Following Dietary Supplementation with Linseed and Safflower Oil<strong> </strong>
Source: Preprints.org preprint supplement (doi:10.20944/preprints201810.0185.v1), 2018-10-09
Supplement: Supplementary file 4 [file Supplementary File 4_Cis genes for lncRNAs.xlsx]

## Sheet: LSO cis genes
Additional file 4a: Cis target genes of lncRNAs in linseed oil treatment
LncRNA	Gene	cor	p	Chromosome	lncRNA start	LncRNA stop	Gene start	Gene Stop
XLOC_000274	TBC1D23	0.798979	6.98049e-05	1	44287407	44288976	44199315	44254410
XLOC_000303	PCNP	0.701527	0.00117679	1	46419878	46420286	46355783	46370616
XLOC_001059	CEP70	0.786167	0.000109557	1	131656063	131659228	131590399	131658628
XLOC_001215	TRPM2	0.716747	0.000816873	1	145825021	145826164	145830610	145871792
XLOC_001216	TRPM2	0.786975	0.000106581	1	145826611	145828067	145830610	145871792
XLOC_001217	TRPM2	0.88253	1.25344e-06	1	145828594	145829057	145830610	145871792
XLOC_001314	CAPN7	0.967559	5.57082e-11	1	154021271	154022508	153971502	154021605
XLOC_001800	RABL3	0.95163	1.29395e-09	1	66037830	66037870	65992475	66037857
XLOC_001909	OPA1	0.742566	0.000416142	1	74504173	74504663	74383828	74467298
XLOC_001926	MASP1	0.735586	0.000503092	1	80588414	80588503	80596924	80649363
XLOC_001933	MASP1	0.7935	8.49634e-05	1	80597095	80597263	80596924	80649363
XLOC_002126	MLF1	0.7298	0.000586258	1	109816773	109817609	109763292	109793739
XLOC_002256	GK5	0.728261	0.000610223	1	127748951	127749139	127736221	127814876
XLOC_002455	S100B	0.80568	5.44426e-05	1	147998139	148001979	148009651	148016981
XLOC_002709	IQGAP2	0.956479	5.64461e-10	10	7867215	7868250	7554265	7867328
XLOC_002917	PABPN1	0.702172	0.00115922	10	21462614	21466011	21427137	21434016
XLOC_003178	MGAT2	0.805291	5.52466e-05	10	42700808	42701228	42701307	42702665
XLOC_003180	MGAT2	0.720155	0.000750402	10	42703432	42705761	42701307	42702665
XLOC_003182	KLHDC1	0.7006	0.00120239	10	42712911	42717985	42749352	42789691
XLOC_003613	FUT8	0.898467	4.11217e-07	10	78164260	78165263	77989585	78165236
XLOC_003716	NUMB	0.710579	0.000949673	10	85121140	85126974	85126907	85183835
XLOC_003716	PAPLN	0.921956	5.40606e-08	10	85121140	85126974	85097754	85123914
XLOC_003855	B2M	0.729293	0.00059407	10	104125754	104126396	104139090	104145312
XLOC_003867	DCP2	0.711702	0.000924232	10	933126	941083	944927	992564
XLOC_003971	HOMER1	0.77617	0.000152607	10	10343932	10345797	10350692	10484916
XLOC_003977	SERINC5	0.745069	0.000388217	10	11046538	11047462	11052483	11103578
XLOC_004335	AQR	0.724249	0.000676571	10	30421799	30429487	30432687	30514706
XLOC_004337	AQR	0.73863	0.000463468	10	30531803	30531951	30432687	30514706
XLOC_004337	ZNF770	0.925032	3.95771e-08	10	30531803	30531951	30525210	30527276
XLOC_004458	ARF6	0.832171	1.84237e-05	10	42903208	42904346	42902260	42902938
XLOC_004716	BMP4	0.93163	1.93444e-08	10	66758304	66758373	66751296	66755026
XLOC_004755	ARID4A	0.771573	0.000176755	10	70838372	70838652	70838970	70899184
XLOC_004895	VTI1B	0.931435	1.97774e-08	10	80131710	80132175	80113761	80131964
XLOC_004994	RPS6KL1	0.93796	9.07388e-09	10	86569129	86569234	86553660	86569205
XLOC_005150	SPG11	0.721274	0.000729582	10	104125755	104126172	104004263	104081363
XLOC_005529	EPCAM	0.757362	0.000272792	11	29639397	29640960	29626087	29636759
XLOC_005960	KCNF1	0.821379	2.92553e-05	11	86705895	86710266	86759338	86761647
XLOC_005981	ADAM17	0.872818	2.29227e-06	11	87940593	87942566	87898074	87940943
XLOC_006031	RABGAP1	0.926417	3.42467e-08	11	94262508	94264483	94103009	94264248
XLOC_006031	STRBP	0.825058	2.50759e-05	11	94262508	94264483	94281217	94418835
XLOC_006211	NOTCH1	0.786702	0.000107579	11	104052509	104053613	103986874	104030692
XLOC_006320	PPP1R26	0.738652	0.00046319	11	106469357	106473531	106462138	106465659
XLOC_006592	SLC8A1	0.754425	0.000297323	11	22424088	22435064	22443220	22797877
XLOC_006794	VAMP5	0.77032	0.000183867	11	49282111	49282571	49249763	49258304
XLOC_006794	VAMP8	0.830077	2.02031e-05	11	49282111	49282571	49260841	49264015
XLOC_006972	FNDC4	0.732508	0.000546014	11	72147396	72150019	72181230	72183230
XLOC_007125	ID2	0.978072	2.50955e-12	11	88587642	88589719	88584862	88587166
XLOC_007349	AGPAT2	0.724107	0.000679038	11	104164255	104164666	104134683	104146456
XLOC_007352	AGPAT2	0.783188	0.000121144	11	104185452	104185644	104134683	104146456
XLOC_007410	RNF208	0.777103	0.000148061	11	105876054	105876730	105878864	105879664
XLOC_007411	TUBB4B	0.775855	0.000154164	11	105881053	105881435	105860110	105862549
XLOC_007663	STARD13	0.894839	5.38191e-07	12	28031032	28034473	27866074	28033238
XLOC_007770	PSPC1	0.816711	3.54019e-05	12	36605126	36608102	36529631	36579763
XLOC_008054	ABHD13	0.857546	5.40031e-06	12	87630477	87635513	87630497	87631510
XLOC_008236	SPRYD7	0.718529	0.000781517	12	19524027	19524363	19493438	19511216
XLOC_008423	GJB2	0.71239	0.000908927	12	36336295	36336481	36335916	36340957
XLOC_008757	USP6NL	0.78792	0.000103191	13	12831253	12835200	12778211	12833138
XLOC_008861	MLLT10	0.929431	2.4745e-08	13	23236574	23238211	23031278	23236618
XLOC_009058	RIN2	0.776655	0.000150231	13	39870561	39872504	39808123	39871299
XLOC_009117	PFKP	0.770071	0.000185309	13	45556402	45558738	45500599	45553520
XLOC_009366	COX4I2	0.826688	2.33941e-05	13	61743017	61743759	61745578	61750870
XLOC_009490	RALGAPB	0.870394	2.64494e-06	13	68112194	68116277	68040825	68116124
XLOC_009533	MYBL2	0.892439	6.39651e-07	13	72965646	72966159	72939569	72966159
XLOC_009963	SLC24A3	0.751453	0.000324013	13	39199159	39200427	39202450	39632869
XLOC_010005	FAM208B	0.885378	1.03957e-06	13	43398707	43398925	43333398	43366338

## Sheet: SFO cis genes
Additional file 4b: Cis target genes of lncRNAs in saflower oil treatment
lncRNA	gene	cor	p	chromosome	lncRNA start	lncRNA stop	Gene start	Gene stop
XLOC_000274	TBC1D23	0.730084	0.000581928	1	44287407	44288976	44199315	44254410
XLOC_000377	SPICE1	0.769404	0.000189218	1	58670922	58672676	58585567	58643594
XLOC_000510	7SK	0.717673	0.000798344	1	68422808	68424349	68391715	68392093
XLOC_000598	TMEM44	0.7247	0.000668833	1	73563979	73565017	73516016	73559858
XLOC_000740	USP13	0.88677	9.4707e-07	1	87936484	87939553	87949654	88075267
XLOC_001059	CEP70	0.973807	1.02631e-11	1	131656063	131659228	131590399	131658628
XLOC_001314	CAPN7	0.972892	1.34659e-11	1	154021271	154022508	153971502	154021605
XLOC_001614	DZIP3	0.757249	0.000273706	1	53753669	53754034	53768326	53884123
XLOC_001800	GTF2E1	0.773415	0.000166717	1	66037830	66037870	66042806	66070880
XLOC_001800	RABL3	0.978239	2.36167e-12	1	66037830	66037870	65992475	66037857
XLOC_001900	FAM43A	0.797573	7.34569e-05	1	73470022	73470845	73468658	73469929
XLOC_001900	TMEM44	0.719672	0.00075953	1	73470022	73470845	73516016	73559858
XLOC_001909	OPA1	0.737677	0.000475579	1	74504173	74504663	74383828	74467298
XLOC_001923	BCL6	0.797951	7.24597e-05	1	80169821	80179076	80179482	80202388
XLOC_001926	MASP1	0.92778	2.96159e-08	1	80588414	80588503	80596924	80649363
XLOC_001931	MASP1	0.92463	4.12565e-08	1	80591307	80591975	80596924	80649363
XLOC_001933	MASP1	0.953011	1.0308e-09	1	80597095	80597263	80596924	80649363
XLOC_002224	PFN2	0.774859	0.00015919	1	119149230	119150685	119151123	119157806
XLOC_002265	ZBTB38	0.738982	0.000459065	1	128582785	128583612	128532757	128536371
XLOC_002709	IQGAP2	0.971851	1.81459e-11	10	7867215	7868250	7554265	7867328
XLOC_002799	FEM1B	0.815538	3.71091e-05	10	15094591	15096554	15080222	15092340
XLOC_002804	7SK	0.767768	0.000199107	10	15628955	15636424	15665209	15665484
XLOC_002887	EMC9	0.791102	9.24297e-05	10	20851934	20852446	20844420	20846694
XLOC_002915	BCL2L2	0.742059	0.000421998	10	21443716	21445755	21438715	21443574
XLOC_002915	PABPN1	0.731721	0.000557468	10	21443716	21445755	21427137	21434016
XLOC_002917	BCL2L2	0.855621	5.97464e-06	10	21462614	21466011	21438715	21443574
XLOC_002917	PABPN1	0.865328	3.53499e-06	10	21462614	21466011	21427137	21434016
XLOC_003134	CHP1	0.754935	0.000292936	10	36886461	36894278	36835140	36872289
XLOC_003363	SLTM	0.886904	9.38558e-07	10	51456464	51459993	51410207	51453823
XLOC_003372	TCF12	0.724963	0.000664341	10	53481760	53482972	53089215	53481049
XLOC_003613	FUT8	0.987906	2.22045e-14	10	78164260	78165263	77989585	78165236
XLOC_003617	GPHN	0.735757	0.000500794	10	78898768	78904231	78906241	79442326
XLOC_003716	PAPLN	0.984425	1.65867e-13	10	85121140	85126974	85097754	85123914
XLOC_003717	PAPLN	0.883997	1.13898e-06	10	85095731	85096346	85097754	85123914
XLOC_003855	B2M	0.979389	1.53499e-12	10	104125754	104126396	104139090	104145312
XLOC_003867	DCP2	0.713488	0.000884965	10	933126	941083	944927	992564
XLOC_003867	MCC	0.705166	0.00108058	10	933126	941083	610854	933224
XLOC_004063	CLN6	0.728652	0.000604064	10	15022407	15023193	15025858	15041922
XLOC_004063	PIAS1	0.715605	0.0008402	10	15022407	15023193	14878655	15004134
XLOC_004126	IPO4	0.774719	0.000159905	10	20796790	20796820	20801455	20810605
XLOC_004269	RNASE10	0.844236	1.0559e-05	10	26626146	26627386	26631719	26632354
XLOC_004271	RNASE10	0.785684	0.00011137	10	26633547	26633811	26631719	26632354
XLOC_004272	RNASE10	0.734079	0.000523735	10	26642762	26643618	26631719	26632354
XLOC_004335	AQR	0.761062	0.000244329	10	30421799	30429487	30432687	30514706
XLOC_004337	AQR	0.74243	0.000417714	10	30531803	30531951	30432687	30514706
XLOC_004337	ZNF770	0.928876	2.63002e-08	10	30531803	30531951	30525210	30527276
XLOC_004372	RPUSD2	0.786528	0.000108219	10	36254035	36256835	36280971	36284979
XLOC_004458	ARF6	0.749867	0.000339057	10	42903208	42904346	42902260	42902938
XLOC_004458	NEMF	0.803947	5.81089e-05	10	42903208	42904346	42809222	42862866
XLOC_004462	SOS2	0.796228	7.7101e-05	10	43075520	43077827	43096672	43177625
XLOC_004546	TPM1	0.805304	5.52205e-05	10	47075320	47076378	47056204	47065846
XLOC_004716	BMP4	0.99228	6.66134e-16	10	66758304	66758373	66751296	66755026
XLOC_004753	ACTR10	0.707005	0.00103454	10	70819095	70821996	70761697	70788174
XLOC_004755	ARID4A	0.746073	0.000377466	10	70838372	70838652	70838970	70899184
XLOC_004798	SYNE2	0.768987	0.000191699	10	76594576	76594970	76362023	76699213
XLOC_004804	ZBTB1	0.902886	2.92216e-07	10	76933556	76936157	76961607	76979552
XLOC_004888	ATP6V1D	0.735862	0.000499395	10	79579898	79580914	79584175	79599910
XLOC_004895	VTI1B	0.999341	0	10	80131710	80132175	80113761	80131964
XLOC_004895	ZFYVE26	0.724772	0.000667593	10	80131710	80132175	80180315	80245861
XLOC_004994	RPS6KL1	0.977732	2.83507e-12	10	86569129	86569234	86553660	86569205
XLOC_005144	CTDSPL2	0.721059	0.000733545	10	103896454	103897295	103924175	103970672
XLOC_005224	ANKRD23	0.750264	0.000335244	11	2766442	2767614	2768909	2773197
XLOC_005225	ANKRD23	0.737088	0.000483203	11	2772454	2775293	2768909	2773197
XLOC_005225	CNNM3	0.856348	5.75181e-06	11	2772454	2775293	2730998	2762524
XLOC_005981	ADAM17	0.957875	4.36725e-10	11	87940593	87942566	87898074	87940943
XLOC_005981	CPSF3	0.871791	2.43634e-06	11	87940593	87942566	87960693	87994179
XLOC_006031	RABGAP1	0.999378	0	11	94262508	94264483	94103009	94264248
XLOC_006031	STRBP	0.910718	1.52958e-07	11	94262508	94264483	94281217	94418835
XLOC_006117	CCBL1	0.748587	0.00035163	11	99291084	99291889	99340500	99411162
XLOC_006320	C9orf116	0.739076	0.00045789	11	106469357	106473531	106451397	106455940
XLOC_006320	PPP1R26	0.805787	5.4222e-05	11	106469357	106473531	106462138	106465659
XLOC_006372	NCAPH	0.78978	9.67785e-05	11	2398496	2401579	2401655	2435800
XLOC_006592	SLC8A1	0.720668	0.000740799	11	22424088	22435064	22443220	22797877
XLOC_006626	SRBD1	0.716293	0.000826081	11	27620675	27621472	27647167	27888855
XLOC_006794	RNF181	0.819314	3.18513e-05	11	49282111	49282571	49244485	49246356
XLOC_006794	VAMP8	0.7174	0.000803759	11	49282111	49282571	49260841	49264015
XLOC_006960	FOSL2	0.781012	0.000130248	11	71349277	71349815	71329772	71349193
XLOC_007012	DTNB	0.804481	5.69576e-05	11	73691558	73692868	73724474	73935363
XLOC_007125	ID2	0.983895	2.16271e-13	11	88587642	88589719	88584862	88587166
XLOC_007210	LRSAM1	0.734402	0.000519262	11	98160945	98161274	98196090	98229896
XLOC_007349	SNORA17	0.72747	0.000622852	11	104164255	104164666	104184905	104185036
XLOC_007349	SNORA17	0.72747	0.000622852	11	104164255	104164666	104183742	104183865
XLOC_007352	AGPAT2	0.777371	0.000146777	11	104185452	104185644	104134683	104146456
XLOC_007411	NDOR1	0.703313	0.00112873	11	105881053	105881435	105883825	105892426
XLOC_007458	BET1L	0.777842	0.000144543	11	107113439	107115727	107155091	107159421
XLOC_007498	ELF1	0.773264	0.000167518	12	11172462	11174975	11183378	11269367
XLOC_007663	STARD13	0.992453	4.44089e-16	12	28031032	28034473	27866074	28033238
XLOC_007742	SACS	0.872783	2.29703e-06	12	34920122	34922349	34876100	34917630
XLOC_007770	PARP4	0.754311	0.000298314	12	36605126	36608102	36656631	36727198
XLOC_007770	PSPC1	0.924894	4.0148e-08	12	36605126	36608102	36529631	36579763
XLOC_007816	FBXL3	0.764937	0.000217253	12	52464233	52464748	52466040	52477380
XLOC_008054	ABHD13	0.736664	0.000488751	12	87630477	87635513	87630497	87631510
XLOC_008054	LIG4	0.707771	0.00101582	12	87630477	87635513	87606118	87613800
XLOC_008182	LCP1	0.713556	0.000883478	12	16251771	16252470	16255788	16320221
XLOC_008236	SPRYD7	0.867731	3.08511e-06	12	19524027	19524363	19493438	19511216
XLOC_008757	USP6NL	0.9676	5.51656e-11	13	12831253	12835200	12778211	12833138
XLOC_008783	KIN	0.820768	3.00043e-05	13	16175043	16175926	16187650	16210886
XLOC_008783	TAF3	0.82184	2.87008e-05	13	16175043	16175926	16043506	16163986
XLOC_008790	FBXO18	0.758748	0.000261821	13	17639908	17641353	17650891	17690062
XLOC_008861	MLLT10	0.93646	1.0932e-08	13	23236574	23238211	23031278	23236618
XLOC_008913	FRMD4A	0.717929	0.000793281	13	28641578	28643225	28631455	28961637
XLOC_008923	NMT2	0.843842	1.07605e-05	13	29966833	29967448	29967417	30027451
XLOC_008993	ZEB1	0.729522	0.000590529	13	34261729	34264551	34063175	34261299
XLOC_009058	RIN2	0.983562	2.54685e-13	13	39870561	39872504	39808123	39871299
XLOC_009117	PFKP	0.721824	0.00071953	13	45556402	45558738	45500599	45553520
XLOC_009490	RALGAPB	0.999848	0	13	68112194	68116277	68040825	68116124
XLOC_009533	MYBL2	0.980771	8.8507e-13	13	72965646	72966159	72939569	72966159
XLOC_009604	EYA2	0.78406	0.00011765	13	76490100	76492143	76311439	76487993
XLOC_009854	MLLT10	0.727317	0.000625323	13	23177129	23177406	23031278	23236618
XLOC_010005	FAM208B	0.996567	0	13	43398707	43398925	43333398	43366338
XLOC_010076	GPCPD1	0.759706	0.000254458	13	48074344	48076543	48086530	48150177
XLOC_010334	NCOA6	0.995263	0	13	64726439	64726644	64639066	64726460
XLOC_010661	ARHGAP39	0.964989	1.01698e-10	14	1600158	1601738	1563866	1600378
XLOC_010698	FAM83H	0.941257	5.92423e-09	14	2229212	2233723	2227350	2232020
XLOC_010698	MAPK15	0.733534	0.000531379	14	2229212	2233723	2235034	2240765
XLOC_010823	HAS2	0.756639	0.000278669	14	19701986	19702567	19703611	19733798
XLOC_010908	GGH	0.822035	2.84698e-05	14	29691719	29699847	29736445	29759096
XLOC_010933	PREX2	0.958171	4.13205e-10	14	34340181	34345703	34040796	34340573
XLOC_011016	ZBTB10	0.82408	2.61342e-05	14	45867988	45871965	45826252	45855495
XLOC_011243	TMEM64	0.728778	0.000602087	14	75914324	75915608	75870563	75904774
XLOC_011285	ENPP2	0.781616	0.000127667	14	83495242	83496686	83360211	83456674
XLOC_011359	ZNF16	0.827117	2.29679e-05	14	1428543	1429517	1445334	1456750
XLOC_011389	ARHGAP39	0.802377	6.16083e-05	14	1649270	1649839	1563866	1600378
XLOC_011389	TONSL	0.733702	0.000529009	14	1649270	1649839	1681494	1692498
XLOC_011390	KIFC2	0.724129	0.000678654	14	1650411	1651384	1656950	1663804
XLOC_011401	MROH1	0.828918	2.12493e-05	14	1895253	1898836	1844664	1894424
XLOC_011402	HGH1	0.884089	1.13212e-06	14	1906641	1907319	1905129	1907245
XLOC_011440	NAPRT	0.723605	0.000687769	14	2351031	2354148	2327870	2331019
XLOC_011622	PDE7A	0.937229	9.94274e-09	14	31907497	31907966	31803026	31857899
XLOC_011695	SBSPON	0.77764	0.000145498	14	38542105	38542917	38554723	38585200
XLOC_011699	RDH10	0.859615	4.83681e-06	14	38718415	38719691	38745909	38775000
XLOC_012186	NXPE2	0.822692	2.77e-05	15	25534554	25535977	25515542	25524857
XLOC_012323	PDE3B	0.88738	9.088e-07	15	38627931	38629279	38466100	38626862
XLOC_012478	DCHS1	0.772937	0.000169275	15	47020927	47023617	47042652	47064122
XLOC_012872	SLC35C1	0.727315	0.000625361	15	76724023	76724338	76725870	76731444
XLOC_013104	BIRC2	0.752618	0.000313324	15	6614077	6614217	6585516	6607013
XLOC_013231	NPAT	0.758146	0.000266536	15	18052065	18052699	18055854	18096604
XLOC_013236	EXPH5	0.946773	2.73954e-09	15	18493896	18494061	18459440	18494061
XLOC_013307	FXYD6	0.999922	0	15	28964629	28964813	28926760	28963808
XLOC_013734	FBXO3	0.717441	0.000802935	15	65136320	65137604	65186337	65219692
XLOC_013790	CHST1	0.991873	8.88178e-16	15	76589236	76591859	76573748	76577430
XLOC_013791	CHST1	0.75164	0.000322276	15	76579360	76580054	76573748	76577430
XLOC_013808	CREB3L1	0.737485	0.000478051	15	77121770	77124873	77157186	77193643
XLOC_014068	NFASC	0.988492	1.4877e-14	16	2628912	2634917	2557488	2629557
XLOC_014174	HLX	0.70728	0.00102779	16	25009209	25009442	25059261	25064940
XLOC_014185	HHIPL2	0.739728	0.000449832	16	26742472	26747603	26713225	26741364
XLOC_014403	LAD1	0.74891	0.000348428	16	49314168	49315076	49272707	49285532
XLOC_014481	ACAP3	0.83814	1.40666e-05	16	52614999	52616709	52601203	52610521
XLOC_014482	ACAP3	0.719985	0.000753607	16	52617661	52619004	52601203	52610521
XLOC_014507	SPEN	0.748547	0.000352028	16	52996180	52997652	52883152	52974692
XLOC_014646	EDEM3	0.789574	9.74718e-05	16	67285356	67286270	67209942	67278874
XLOC_014716	NSL1	0.833116	1.76652e-05	16	72699566	72701052	72664764	72701047
XLOC_014848	PIK3C2B	0.705707	0.00106686	16	1960260	1961424	1981479	2030002
XLOC_014848	PPP1R15B	0.718574	0.00078064	16	1960260	1961424	1966721	1972162
XLOC_014934	YOD1	0.702539	0.00114934	16	4725950	4725999	4721589	4723835
XLOC_015026	TLR5	0.969603	3.33151e-11	16	27327796	27327866	27303741	27306317
XLOC_015028	TLR5	0.730535	0.000575102	16	27308736	27309770	27303741	27306317
XLOC_015046	TP53BP2	0.979701	1.36025e-12	16	27907317	27908727	27842000	27882005
XLOC_015156	VAMP4	0.836806	1.4955e-05	16	40030693	40031007	40005644	40029767
XLOC_015383	PRDM2	0.954883	7.49029e-10	16	55172008	55172062	55096211	55154550
XLOC_015390	ADIPOR1	0.718114	0.000789639	16	55481695	55485465	55522005	55527367
XLOC_015412	SNORD47	0.823168	2.71539e-05	16	56695544	56695769	56691483	56691559
XLOC_015412	SNORD81	0.953927	8.83158e-10	16	56695544	56695769	56691273	56691349
XLOC_015478	QSOX1	0.784415	0.000116252	16	62795682	62797235	62804447	62845817
XLOC_015481	QSOX1	0.713202	0.000891157	16	62803536	62804485	62804447	62845817
XLOC_015486	ACBD6	0.889643	7.78309e-07	16	63127549	63128092	63030135	63128053
XLOC_015599	SERTAD4	0.703299	0.0011291	16	75000674	75003168	74993032	75000062
XLOC_015671	KLHL2	0.730532	0.000575138	17	518343	518872	325197	483093
XLOC_015862	JADE1	0.778741	0.000140362	17	29360078	29360269	29368416	29421827
XLOC_015896	NUDT6	0.760273	0.000250177	17	35221366	35223876	35146244	35205444
XLOC_015919	PPID	0.733473	0.000532242	17	41309075	41311643	41249493	41262410
XLOC_015925	PDGFC	0.723824	0.000683946	17	43463461	43464983	43348702	43457620
XLOC_015939	ZNF268	0.988094	1.95399e-14	17	45223767	45225885	45221485	45223845
XLOC_016203	CRYBA4	0.965714	8.62164e-11	17	68530600	68531001	68524676	68530920
XLOC_016308	GGT5	0.812606	4.16859e-05	17	73474229	73476073	73425746	73434932
XLOC_016311	GGT5	0.704728	0.00109182	17	73479994	73481212	73425746	73434932
XLOC_016341	CRKL	0.792025	8.94928e-05	17	74297437	74300075	74286482	74297800
XLOC_016354	SLC7A4	0.702459	0.00115149	17	74382417	74383462	74366170	74369086
XLOC_016621	NAA15	0.80269	6.08979e-05	17	18607104	18610388	18613425	18687720
XLOC_016672	SPRY1	0.779561	0.000136636	17	34739343	34745434	34749102	34753222
XLOC_016759	ZNF605	0.985469	9.54792e-14	17	44995863	44995897	44966897	44973509
XLOC_016762	ZNF605	0.83239	1.82453e-05	17	44993175	44993665	44966897	44973509
XLOC_016814	FAM101A	0.700994	0.00119146	17	53719398	53721248	53715930	53718425
XLOC_016835	C12orf65	0.893405	5.97006e-07	17	54581383	54581446	54568694	54571083
XLOC_016869	ORAI1	0.715661	0.00083905	17	55853273	55853507	55858843	55873788
XLOC_016910	SH2B3	0.700204	0.00121346	17	57358027	57358295	57398014	57422729
XLOC_017089	GGT5	0.789524	9.76393e-05	17	73416860	73419712	73425746	73434932
XLOC_017193	AARS	0.996276	0	18	1850327	1850938	1829597	1850873
XLOC_017370	CDK10	0.700081	0.00121692	18	14629681	14630755	14610728	14617868
XLOC_017370	ZNF276	0.719347	0.000765729	18	14629681	14630755	14635302	14649693
XLOC_017626	NIP7	0.790939	9.29569e-05	18	36611328	36614607	36607628	36610400
XLOC_017626	TERF2	0.747787	0.000359689	18	36611328	36614607	36618815	36640451
XLOC_017790	WDR62	0.720673	0.000740703	18	46880645	46881678	46906321	46954817
XLOC_017852	PAK4	0.94265	4.91122e-09	18	49169560	49170530	49160982	49169719
XLOC_018359	ZNF667	0.997157	0	18	63908439	63908591	63871806	63894090
XLOC_018380	ZNF304	0.998156	0	18	64693035	64697240	64691262	64695901
XLOC_018381	ZNF304	0.758583	0.000263103	18	64690043	64690668	64691262	64695901
XLOC_018382	ZNF304	0.885014	1.06506e-06	18	64698486	64702832	64691262	64695901
XLOC_018467	MZF1	0.848014	8.78539e-06	18	65984998	65986111	65971580	65980686
XLOC_018580	TLDC1	0.762059	0.000237107	18	10686334	10688255	10694237	10706275
XLOC_018641	PIEZO1	0.726136	0.000644651	18	14048006	14048371	13984761	14002517
XLOC_018732	IRX6	0.767934	0.000198089	18	23682418	23683259	23681599	23687572
XLOC_018852	ZNF821	0.701556	0.00117599	18	39350308	39351164	39351471	39368532
XLOC_018920	GRAMD1A	0.821324	2.93222e-05	18	45928672	45936794	45932691	45957028
XLOC_018936	HAUS5	0.81991	3.10825e-05	18	46542332	46544399	46528185	46538476
XLOC_018978	ZNF568	0.789778	9.67854e-05	18	47426204	47428546	47384124	47406577
XLOC_018978	ZNF829	0.742009	0.000422582	18	47426204	47428546	47410920	47422682
XLOC_019170	BCAM	0.79721	7.4425e-05	18	52926447	52926566	52965138	52976445
XLOC_019170	BCL3	0.713599	0.000882564	18	52926447	52926566	52922334	52931384
XLOC_019203	SYMPK	0.701842	0.0011682	18	53868064	53870983	53800327	53829555
XLOC_019294	AKT1S1	0.809242	4.75195e-05	18	56680879	56680975	56672752	56680246
XLOC_019294	MED25	0.821809	2.87387e-05	18	56680879	56680975	56632968	56646924
XLOC_019294	PNKP	0.968843	4.04931e-11	18	56680879	56680975	56666460	56671418
XLOC_019294	PTOV1	0.827805	2.22972e-05	18	56680879	56680975	56658490	56666065
XLOC_019629	ZNF606	0.731314	0.000563469	18	65641017	65642671	65645367	65667374
XLOC_019630	ZNF135	0.768914	0.000192135	18	65718476	65718511	65676642	65689192
XLOC_019707	SRSF1	0.767048	0.000203598	19	9041838	9047885	9038200	9041927
XLOC_019707	VEZF1	0.83408	1.69198e-05	19	9041838	9047885	9007494	9019157
XLOC_019758	RNF43	0.825029	2.51067e-05	19	9614117	9616456	9548268	9612348
XLOC_019796	TUBD1	0.718463	0.000782798	19	11047977	11049539	11046574	11070490
XLOC_019804	INTS2	0.842726	1.13493e-05	19	11379823	11383919	11401822	11455023
XLOC_019804	MED13	0.951985	1.22133e-09	19	11379823	11383919	11288860	11379955
XLOC_019811	TBX2	0.733606	0.000530362	19	11956960	11958045	11943185	11951411
XLOC_019967	VPS53	0.763987	0.000223648	19	22687588	22693814	22694706	22819799
XLOC_020146	MYH10	0.721309	0.000728939	19	28682062	28684684	28680825	28800880
XLOC_020164	SCO1	0.711167	0.00093628	19	30306492	30311777	30276156	30296404
XLOC_020306	NXPH3	0.846474	9.47463e-06	19	37676397	37677344	37671531	37672235
XLOC_020368	CDK12	0.980129	1.14864e-12	19	40585571	40590961	40528317	40566472
XLOC_020472	CCDC43	0.727804	0.00061749	19	45063163	45066523	45052980	45062313
XLOC_020526	SMURF2	0.761202	0.000243305	19	49378607	49381948	49384215	49428741
XLOC_020607	7SK	0.727043	0.000629758	19	51966322	51967192	51988254	51988578
XLOC_020648	TMC6	0.984725	1.42109e-13	19	54666422	54667525	54647278	54666987
XLOC_020830	MMD	0.940505	6.54375e-09	19	5846835	5847033	5819716	5840124
XLOC_020870	SRSF1	0.994919	0	19	9041045	9042110	9038200	9041927
XLOC_020870	VEZF1	0.86528	3.54455e-06	19	9041045	9042110	9007494	9019157
XLOC_021175	SERPINF1	0.812995	4.10514e-05	19	23385213	23385661	23422880	23430667
XLOC_021223	ANKFY1	0.861912	4.27103e-06	19	25322369	25322842	25337350	25387068
XLOC_021223	CYB5D2	0.702299	0.0011558	19	25322369	25322842	25323256	25329033
XLOC_021223	ZZEF1	0.892121	6.5427e-07	19	25322369	25322842	25230019	25322722
XLOC_021356	KDM6B	0.713382	0.000887238	19	28176261	28178377	28147259	28155406
XLOC_021772	GRN	0.753867	0.000302188	19	44812384	44813474	44775157	44782140
XLOC_021772	ITGA2B	0.781074	0.000129982	19	44812384	44813474	44798081	44811145
XLOC_021787	PLCD3	0.756105	0.000283072	19	45446131	45453092	45411512	45432420
XLOC_021841	bta-mir-3064	0.733653	0.000529707	19	49374955	49376611	49332072	49332155
XLOC_021841	DDX5	0.762036	0.000237274	19	49374955	49376611	49330954	49337523
XLOC_021841	POLG2	0.80186	6.28011e-05	19	49374955	49376611	49312498	49328600
XLOC_021903	CD7	0.764908	0.000217447	19	51144011	51144150	51152180	51155591
XLOC_022006	TMC6	0.79004	9.59104e-05	19	54643467	54644828	54647278	54666987
XLOC_022091	C17orf80	0.927735	2.97613e-08	19	58659536	58659608	58648989	58656230
XLOC_022107	ABCA5	0.869021	2.86464e-06	19	61957236	61957389	61873253	61919888
XLOC_022479	RND3	0.986304	5.9619e-14	2	45819989	45822011	45800466	45822011
XLOC_022501	ORC4	0.750407	0.000333875	2	48379077	48381877	48282736	48377766
XLOC_022701	FZD7	0.863635	3.88484e-06	2	90986223	90986909	90987008	90989214
XLOC_023038	KHDRBS1	0.755652	0.000286856	2	122290962	122291096	122233943	122257545
XLOC_023127	PAFAH2	0.805839	5.41154e-05	2	127723505	127724515	127684837	127720396
XLOC_023181	KDM1A	0.727728	0.000618716	2	130378038	130381193	130370509	130436531
XLOC_023181	LUZP1	0.88411	1.13057e-06	2	130378038	130381193	130360072	130363164
XLOC_023198	ECE1	0.701202	0.00118571	2	132096377	132097260	131935441	132060210
XLOC_023252	ARHGEF19	0.720067	0.000752048	2	136442982	136447728	136480737	136491543
XLOC_023252	FBXO42	0.906746	2.13892e-07	2	136442982	136447728	136362255	136444097
XLOC_023412	HOXD4	0.752831	0.000311394	2	20770352	20773489	20794855	20797028
XLOC_023568	GALNT5	0.768486	0.000194716	2	38791933	38792480	38796689	38838127
XLOC_023583	FMNL2	0.954508	7.99471e-10	2	43979424	43979866	43652958	43979596
XLOC_023777	CLK1	0.719861	0.000755938	2	89882048	89885649	89920586	89927819
XLOC_023793	WDR12	0.757598	0.000270892	2	91615875	91617994	91621732	91645548
XLOC_023797	RAPH1	0.744227	0.000397427	2	92058992	92059698	92068092	92126362
XLOC_024175	BSDC1	0.715134	0.000849995	2	121967182	121968748	122006937	122029837
XLOC_024213	GMEB1	0.973973	9.75742e-12	2	125375558	125375959	125343515	125370269
XLOC_024300	TCEB3	0.858498	5.13441e-06	2	129764980	129765049	129738383	129752889
XLOC_024411	UBR4	0.704282	0.00110334	2	134038158	134038746	134039040	134176134
XLOC_025060	PPWD1	0.767097	0.000203289	20	13890986	13891645	13929992	13952132
XLOC_025060	TRAPPC13	0.968497	4.41849e-11	20	13890986	13891645	13856108	13891297
XLOC_025060	TRIM23	0.793445	8.51306e-05	20	13890986	13891645	13891748	13925788
XLOC_025744	SLC28A1	0.809293	4.74273e-05	21	23072487	23075411	22949800	23048041
XLOC_025750	WHAMM	0.743325	0.000407497	21	23498761	23499845	23546102	23564310
XLOC_025759	HDGFRP3	0.887739	8.86926e-07	21	25395321	25397488	25317912	25392905
XLOC_025759	TM6SF1	0.721219	0.000730592	21	25395321	25397488	25394313	25424181
XLOC_025922	SEMA7A	0.726819	0.00063342	21	34620837	34622506	34626181	34651240
XLOC_026197	SNX6	0.87326	2.23255e-06	21	45390592	45391976	45418669	45454655
XLOC_026279	C14orf159	0.995255	0	21	56576709	56584422	56534297	56581876
XLOC_026281	GPR68	0.826828	2.32536e-05	21	56626298	56627528	56588076	56591240
XLOC_026539	TNFAIP2	0.925911	3.61153e-08	21	69475746	69476553	69455152	69466051
XLOC_026615	ATP10A	0.870961	2.55846e-06	21	3005003	3007084	2806936	2988464
XLOC_026649	NR2F2	0.759064	0.00025937	21	10776211	10776281	10793104	10806663
XLOC_026664	CHD2	0.954673	7.76968e-10	21	14522550	14522766	14390575	14483806
XLOC_026771	FSD2	0.962388	1.7896e-10	21	23545721	23546197	23501906	23537791
XLOC_026771	WHAMM	0.725564	0.000654192	21	23545721	23546197	23546102	23564310
XLOC_026852	PSMA4	0.732372	0.000547971	21	31495915	31497971	31442649	31450480
XLOC_027027	GPR68	0.9999	0	21	56625719	56626211	56588076	56591240
XLOC_027041	TC2N	0.843725	1.08207e-05	21	57061867	57064101	57075109	57117586
XLOC_027307	CRTAP	0.736067	0.000496654	22	7529158	7530650	7532626	7565025
XLOC_027308	CRTAP	0.739395	0.000453936	22	7530935	7531828	7532626	7565025
XLOC_027450	ANO10	0.738955	0.000459401	22	15930401	15930434	15934723	16139094
XLOC_027450	SNRK	0.862284	4.185e-06	22	15930401	15930434	15877258	15923665
XLOC_027458	ZNF197	0.731444	0.000561544	22	16461735	16463730	16470249	16490038
XLOC_027627	DENND6A	0.823128	2.71999e-05	22	44136934	44141048	44077870	44121649
XLOC_027629	DENND6A	0.761935	0.000237998	22	44142082	44148864	44077870	44121649
XLOC_027762	COL7A1	0.750906	0.000329143	22	51838111	51839348	51859652	51889946
XLOC_027762	SLC26A6	0.782654	0.000123328	22	51838111	51839348	51821391	51832167
XLOC_027778	CDC25A	0.721134	0.00073216	22	52287920	52288813	52242566	52264187
XLOC_027927	XPC	0.7732	0.00016786	22	58686872	58689586	58702013	58724435
XLOC_028093	NKTR	0.715744	0.000837341	22	15320345	15321592	15368280	15418568
XLOC_028229	ATXN7	0.93735	9.79432e-09	22	37717995	37718038	37587794	37675105
XLOC_028256	ACOX2	0.79147	9.12494e-05	22	43425840	43427723	43379504	43410315
XLOC_028268	PDE12	0.829685	2.05515e-05	22	44173442	44177592	44179970	44183679
XLOC_028424	KLHL18	0.834134	1.68789e-05	22	52932574	52937236	52871075	52922306
XLOC_028437	LRRC2	0.737568	0.000476989	22	53505367	53507435	53448776	53486047
XLOC_028443	LRRC2	0.787688	0.000104015	22	53520091	53520884	53448776	53486047
XLOC_028539	H1FX	0.713836	0.00087747	22	59842006	59842205	59841218	59841862
XLOC_028559	GATA2	0.761843	0.000238656	22	60013188	60014018	60016985	60024586
XLOC_028870	CRISP3	0.949399	1.84287e-09	23	22222459	22228954	22162642	22189911
XLOC_028871	CRISP3	0.772506	0.000171609	23	22194292	22195679	22162642	22189911
XLOC_028873	CRISP3	0.737114	0.000482861	23	22197453	22198193	22162642	22189911
XLOC_028941	ATF6B	0.997081	0	23	27067063	27067768	27057896	27067756
XLOC_028941	PPT2	0.788387	0.000101546	23	27067063	27067768	27028167	27035589
XLOC_028941	TNXB	0.739102	0.000457569	23	27067063	27067768	27085415	27136954
XLOC_029029	TRIM39-RPP21	0.715026	0.000852251	23	28283471	28284797	28257737	28271232
XLOC_029059	GABBR1	0.739632	0.00045102	23	28740565	28743655	28775534	28803895
XLOC_029059	PPP1R11	0.773383	0.000166885	23	28740565	28743655	28707264	28710379
XLOC_029059	ZFP57	0.848606	8.53218e-06	23	28740565	28743655	28735960	28739682
XLOC_029088	TRIM27	0.701134	0.00118758	23	29868134	29868157	29906624	29920511
XLOC_029088	ZNF311	0.973745	1.04552e-11	23	29868134	29868157	29860782	29868157
XLOC_029263	TBC1D7	0.711428	0.000930379	23	43025266	43025601	43001022	43024073
XLOC_029761	FBXO9	0.714423	0.000864944	23	25028717	25030305	25030303	25051787
XLOC_029761	ICK	0.790375	9.4801e-05	23	25028717	25030305	24982766	25027197
XLOC_029783	AGER	0.819957	3.10227e-05	23	27053469	27056147	27008831	27011946
XLOC_029783	ATF6B	0.732224	0.000550121	23	27053469	27056147	27057896	27067756
XLOC_029783	PBX2	0.842994	1.12053e-05	23	27053469	27056147	27003269	27006749
XLOC_029849	ABCF1	0.753596	0.000304579	23	28194969	28195656	28199129	28211340
XLOC_029849	DHX16	0.731422	0.000561861	23	28194969	28195656	28140250	28152483
XLOC_029849	GNL1	0.823725	2.65265e-05	23	28194969	28195656	28224609	28231251
XLOC_029858	TRIM39-RPP21	0.841277	1.21545e-05	23	28271571	28272113	28257737	28271232
XLOC_029860	BOLA	0.950278	1.60635e-09	23	28506219	28506465	28502524	28506312
XLOC_030249	ZNF236	0.860025	4.73144e-06	24	2670053	2673266	2597951	2656107
XLOC_030253	ZADH2	0.709112	0.000983779	24	3761520	3766456	3761518	3762444
XLOC_030318	SLC39A6	0.844596	1.03775e-05	24	21341732	21345284	21317313	21337841
XLOC_030470	APCDD1	0.830445	1.98801e-05	24	42600467	42603535	42578580	42597500
XLOC_030763	MOCOS	0.741841	0.000424548	24	21194841	21196094	21198154	21256992
XLOC_030860	COLEC12	0.859367	4.9017e-06	24	35628385	35630119	35630929	35816269
XLOC_030966	SMAD7	0.778689	0.0001406	24	49098978	49099838	49071140	49098714
XLOC_031113	CAPN15	0.710456	0.00095249	25	469573	470592	478495	484110
XLOC_031149	UBE2I	0.960057	2.87385e-10	25	1047647	1048237	1041085	1048106
XLOC_031229	ZNF263	0.754484	0.000296809	25	2697415	2697729	2733865	2740470
XLOC_031343	TMC5	0.996317	0	25	17201573	17203718	17146668	17201619
XLOC_031345	TMC5	0.764596	0.000219529	25	17205643	17207006	17146668	17201619
XLOC_031349	GP2	0.766683	0.000205907	25	18119182	18121309	18102959	18118225
XLOC_031350	GP2	0.722127	0.000714043	25	18121414	18123934	18102959	18118225
XLOC_031485	PRSS53	0.811535	4.34732e-05	25	27449748	27450352	27450356	27455369
XLOC_031684	LMTK2	0.836856	1.49207e-05	25	38375646	38376219	38348134	38395453
XLOC_032042	GPRC5B	0.920361	6.32315e-08	25	17585668	17587172	17588928	17608885
XLOC_032126	ATXN2L	0.732397	0.000547608	25	26222106	26225699	26232746	26243618
XLOC_032126	SH2B1	0.782281	0.000124873	25	26222106	26225699	26208972	26214950
XLOC_032175	ZNF688	0.71791	0.000793655	25	26987409	26987862	26993387	26996169
XLOC_032337	MOSPD3	0.84618	9.61153e-06	25	36469865	36470015	36486497	36489220
XLOC_032464	EIF3B	0.999154	0	25	41454507	41454698	41435744	41453953
XLOC_032467	TMEM184A	0.832823	1.78974e-05	25	41942805	41944328	41946139	41956711
XLOC_032468	TMEM184A	0.706099	0.00105701	25	41944505	41945427	41946139	41956711
XLOC_032643	EXOSC1	0.731095	0.000566716	26	18538544	18538591	18522299	18528929
XLOC_032643	RRP12	0.835286	1.60245e-05	26	18538544	18538591	18468764	18497554
XLOC_032643	ZDHHC16	0.988198	1.82077e-14	26	18538544	18538591	18532938	18538390
XLOC_032727	TRIM8	0.744067	0.000399195	26	23533782	23535029	23536131	23548589
XLOC_033330	ACADSB	0.779825	0.000135453	26	43102233	43107986	43134415	43184345
XLOC_033330	IKZF5	0.789392	9.80858e-05	26	43102233	43107986	43118090	43134286
XLOC_033346	CHST15	0.940017	6.97458e-09	26	44040956	44042357	44047737	44081511
XLOC_033686	MAK16	0.836413	1.52254e-05	27	28417195	28417859	28406557	28416649
XLOC_033761	PSD3	0.917129	8.60271e-08	27	38797673	38805512	38483892	38797972
XLOC_033873	ZNF705A	0.853496	6.66832e-06	27	4992331	4992382	4996159	4999264
XLOC_034008	MFHAS1	0.870774	2.58677e-06	27	24101570	24103670	24100833	24103670
XLOC_034119	SLC20A2	0.879038	1.56646e-06	27	37050452	37054697	36938387	37017424
XLOC_034119	SMIM19	0.75869	0.000262272	27	37050452	37054697	37055089	37070241
XLOC_034276	EXOC8	0.803208	5.97354e-05	28	3343833	3346707	3358381	3360841
XLOC_034322	ARID4B	0.727025	0.000630064	28	8126756	8132012	7972951	8109684
XLOC_034393	CSGALNACT2	0.873809	2.16021e-06	28	13689329	13691970	13651048	13678154
XLOC_034407	PHYHIPL	0.77807	0.000143475	28	14903981	14904574	14904833	14999860
XLOC_034612	ANXA11	0.992095	6.66134e-16	28	35360381	35364105	35318690	35360793
XLOC_034720	ZNF239	0.740624	0.000438966	28	46060952	46064546	46050993	46053236
XLOC_034863	PHYHIPL	0.912419	1.31863e-07	28	14904352	14904541	14904833	14999860
XLOC_034864	PHYHIPL	0.869089	2.85339e-06	28	14896633	14897456	14904833	14999860
XLOC_034865	PHYHIPL	0.76173	0.000239473	28	14901078	14902363	14904833	14999860
XLOC_035164	TSPAN14	0.737844	0.000473448	28	36108933	36109828	36077428	36109014
XLOC_035166	TSPAN14	0.768271	0.000196024	28	36112267	36113323	36077428	36109014
XLOC_035267	SNORA1	0.865974	3.40886e-06	29	1067257	1068202	1066222	1066355
XLOC_035267	SNORA8	0.950491	1.55324e-09	29	1067257	1068202	1065601	1065737
XLOC_035267	TAF1D	0.965926	8.21125e-11	29	1067257	1068202	1056627	1062580
XLOC_035411	INTS4	0.752027	0.000318706	29	18243788	18245896	18136840	18245033
XLOC_035411	RSF1	0.814153	3.92139e-05	29	18243788	18245896	18284512	18426104
XLOC_035659	MARK2	0.717403	0.000803701	29	42878907	42880430	42829261	42865910
XLOC_035861	NAP1L4	0.990237	3.9968e-15	29	49315918	49316920	49264642	49316917
XLOC_035939	SNORA1	0.823254	2.7056e-05	29	1062586	1064325	1066222	1066355
XLOC_035939	SNORA8	0.762242	0.000235799	29	1062586	1064325	1065601	1065737
XLOC_035939	TAF1D	0.883524	1.17487e-06	29	1062586	1064325	1056627	1062580
XLOC_036093	MSANTD2	0.862218	4.2002e-06	29	28595127	28595162	28615680	28644920
XLOC_036252	NXF1	0.705605	0.00106943	29	41855649	41855728	41796853	41808165
XLOC_036252	SNORD31	0.832077	1.85001e-05	29	41855649	41855728	41853135	41853202
XLOC_036299	SYVN1	0.752899	0.000310786	29	44005623	44005833	43997381	44003325
XLOC_036317	MAP3K11	0.716751	0.000816788	29	44491350	44491864	44444057	44460617
XLOC_036340	EIF1AD	0.933616	1.53775e-08	29	44758916	44759356	44756084	44759164
XLOC_036934	GJA5	0.826226	2.38603e-05	3	22001453	22002818	21983348	21999397
XLOC_036935	GJA5	0.738545	0.000464537	3	22002902	22004845	21983348	21999397
XLOC_036943	ACP6	0.706964	0.00103554	3	22101549	22102439	22064166	22085071
XLOC_036968	WARS2	0.897034	4.57862e-07	3	24207063	24207385	24105659	24200029
XLOC_036978	MAN1A2	0.786027	0.000110081	3	25804359	25805263	25821124	25969358
XLOC_037018	AP4B1	0.793294	8.55841e-05	3	29574371	29577534	29624719	29635004
XLOC_037028	PHTF1	0.731326	0.000563285	3	29853612	29854457	29771659	29843496
XLOC_037060	WDR77	0.99673	0	3	32036737	32037380	32020914	32030445
XLOC_037111	PRPF38B	0.85667	5.65542e-06	3	34793295	34797125	34785792	34793589
XLOC_037124	VAV3	0.769902	0.000186295	3	35864148	35866522	35428177	35861571
XLOC_037297	ODF2L	0.729027	0.000598197	3	57872118	57873210	57817816	57856926
XLOC_037325	MCOLN2	0.777503	0.000146151	3	59363293	59365189	59303476	59351124
XLOC_037952	ADCY10	0.756854	0.000276911	3	868857	868976	825294	905484
XLOC_037953	ADCY10	0.868244	2.99578e-06	3	799834	800860	825294	905484
XLOC_037967	CREG1	0.769189	0.000190496	3	1196134	1196811	1196982	1208368
XLOC_038049	NDUFS2	0.991835	8.88178e-16	3	8318771	8318896	8309350	8318876
XLOC_038445	SLC16A1	0.796882	7.53084e-05	3	30530208	30533927	30533845	30563298
XLOC_038514	GSTM3	0.700799	0.00119687	3	33757829	33758250	33768050	33770824
XLOC_038581	CDC14A	0.81484	3.81583e-05	3	42919787	42921476	42934668	43107421
XLOC_038640	DR1	0.706529	0.00104629	3	50265462	50265712	50242939	50265059
XLOC_038664	RPAP2	0.860379	4.64188e-06	3	51172257	51178075	51195435	51281129
XLOC_038674	RPAP2	0.856799	5.61717e-06	3	51190697	51192259	51195435	51281129
XLOC_038704	LRRC8D	0.802952	6.03064e-05	3	53465905	53470371	53475696	53606716
XLOC_038853	DNAJB4	0.940122	6.87974e-09	3	66958590	66958682	66923000	66931737
XLOC_038853	FUBP1	0.704023	0.00111006	3	66958590	66958682	66969542	66993523
XLOC_038853	NEXN	0.750549	0.000332524	3	66958590	66958682	66998944	67053966
XLOC_038871	ST6GALNAC5	0.882626	1.24566e-06	3	67851142	67852596	67863093	68073051
XLOC_038973	FGGY	0.744044	0.000399458	3	86768383	86771932	86788072	87273175
XLOC_039101	IPP	0.813428	4.03567e-05	3	100982044	100982102	100935637	100972708
XLOC_039143	KDM4A	0.736385	0.00049243	3	102921265	102923471	102926388	102963687
XLOC_039271	THRAP3	0.800781	6.53494e-05	3	110113799	110116703	110137251	110208496
XLOC_039279	COL8A2	0.730789	0.000571283	3	110325316	110333487	110299484	110302198
XLOC_039549	TMEM106B	0.720707	0.00074007	4	19924550	19927051	19893089	19915667
XLOC_039666	SEMA3A	0.963625	1.37496e-10	4	36846020	36846079	36628085	36807404
XLOC_039669	SEMA3A	0.755222	0.00029049	4	36817231	36819516	36628085	36807404
XLOC_039720	PTPN12	0.789126	9.89917e-05	4	43820685	43821817	43834354	43884954
XLOC_039720	RSBN1L	0.807127	5.1534e-05	4	43820685	43821817	43698580	43782568
XLOC_039730	RSBN1L	0.704369	0.00110108	4	43796712	43797026	43698580	43782568
XLOC_039740	ARMC10	0.979335	1.56763e-12	4	44665920	44666856	44601612	44662241
XLOC_039960	MYO1G	0.783002	0.000121899	4	77304175	77306535	77317209	77333095
XLOC_040005	CDK13	0.873606	2.18681e-06	4	81649156	81655169	81667665	81807550
XLOC_040133	MKLN1	0.755612	0.000287196	4	96016402	96026149	95807761	96016756
XLOC_040133	PODXL	0.804616	5.66687e-05	4	96016402	96026149	96032591	96039050
XLOC_040317	CUL1	0.833545	1.73301e-05	4	112718388	112721462	112756838	112809775
XLOC_040335	ZNF212	0.821381	2.92524e-05	4	113130429	113132343	113127975	113131240
XLOC_040678	KMT2E	0.919829	6.65765e-08	4	46474284	46474432	46474531	46565717
XLOC_040798	FKBP9	0.737794	0.000474079	4	64201951	64202989	64209775	64252100
XLOC_040988	PSMA2	0.701241	0.00118463	4	78801304	78804005	78821820	78832470
XLOC_041574	PPP1R12A	0.863643	3.88322e-06	5	9350163	9350230	9347411	9511533
XLOC_041921	SENP1	0.74578	0.000380569	5	32358740	32359373	32363553	32407690
XLOC_041985	PRICKLE1	0.733642	0.000529862	5	38394451	38397456	38273723	38388071
XLOC_042294	LRP1	0.809451	4.71391e-05	5	56680150	56681785	56562309	56641157
XLOC_042294	NAB2	0.730992	0.000568253	5	56680150	56681785	56672011	56677995
XLOC_042334	RBMS2	0.775946	0.000153712	5	57260762	57261665	57167137	57219971
XLOC_042357	SMARCC2	0.805817	5.41601e-05	5	57523099	57523163	57467337	57484118
XLOC_042485	NFYB	0.80954	4.69766e-05	5	68147343	68149212	68109725	68127878
XLOC_042678	SLCO1A2	0.820092	3.08517e-05	5	89315996	89316857	89258893	89311142
XLOC_042695	EPS8	0.989286	8.43769e-15	5	94748798	94750099	94673755	94749093
XLOC_042819	C1S	0.70816	0.00100644	5	103726567	103727677	103768066	103779250
XLOC_042841	CHD4	0.997955	0	5	104214033	104214653	104186061	104214563
XLOC_042841	NOP2	0.813818	3.97389e-05	5	104214033	104214653	104215500	104224268
XLOC_042906	CCDC77	0.729474	0.000591273	5	107792107	107793307	107796085	107822807
XLOC_043211	PANX2	0.724822	0.000666739	5	121167532	121168661	121170973	121178483
XLOC_043710	HELB	0.783636	0.000119337	5	47707243	47710473	47713520	47751430
XLOC_043759	SLC16A7	0.718731	0.000777599	5	53980439	53982106	53987909	54214799
XLOC_043821	MYL6	0.846317	9.54753e-06	5	57529185	57529374	57486017	57489133
XLOC_043901	UHRF1BP1L	0.700898	0.00119411	5	64396258	64398462	64414615	64481097
XLOC_043946	GLT8D2	0.999133	0	5	68052872	68052964	67994626	68036627
XLOC_044147	H2AFJ	0.986751	4.57412e-14	5	95568057	95568806	95568130	95568806
XLOC_044154	EMP1	0.730461	0.000576219	5	97078149	97078775	97081921	97101600
XLOC_044341	CHD4	0.87441	2.08345e-06	5	104215144	104215458	104186061	104214563
XLOC_044341	NCAPD2	0.797482	7.3699e-05	5	104215144	104215458	104244559	104272651
XLOC_044423	ATP6V1E1	0.999657	0	5	109584458	109584629	109564503	109578159
XLOC_044434	GGA1	0.714298	0.000867596	5	110007805	110009827	109960753	109979896
XLOC_044477	MIEF1	0.715443	0.000843555	5	111439083	111440555	111444867	111459411
XLOC_044651	ALG12	0.935201	1.27397e-08	5	120954055	120954305	120924137	120932984
XLOC_044681	PANX2	0.745316	0.000385544	5	121169479	121170708	121170973	121178483
XLOC_044834	INTS12	0.950837	1.47008e-09	6	20760401	20762936	20728486	20752923
XLOC_044989	SLC34A2	0.75103	0.000327971	6	46683862	46684507	46724553	46749777
XLOC_045072	N4BP2	0.768622	0.000193895	6	60814556	60819291	60754799	60808098
XLOC_045073	N4BP2	0.752211	0.000317023	6	60819653	60824379	60754799	60808098
XLOC_045076	N4BP2	0.702708	0.00114482	6	60826278	60828271	60754799	60808098
XLOC_045184	NOA1	0.816935	3.50841e-05	6	74070899	74071144	74016234	74026536
XLOC_045184	POLR2B	0.998465	0	6	74070899	74071144	74027219	74071144
XLOC_045307	SHROOM3	0.996718	0	6	93393808	93399282	93340874	93398475
XLOC_045505	MFSD7	0.79291	8.6751e-05	6	108853943	108855487	108855977	108863733
XLOC_045628	TMA16	0.872919	2.27848e-06	6	2119443	2119819	2089641	2119479
XLOC_045629	TMA16	0.755398	0.000288994	6	2083217	2085055	2089641	2119479
XLOC_045809	DHX15	0.713313	0.000888738	6	45621526	45624689	45629617	45683587
XLOC_045810	DHX15	0.723002	0.000698381	6	45624820	45626598	45629617	45683587
XLOC_045951	CNGA1	0.772745	0.000170311	6	68354876	68355199	68316337	68354288
XLOC_045956	OCIAD1	0.717211	0.000807543	6	69097118	69097342	69144344	69167282
XLOC_046107	GRSF1	0.973397	1.16049e-11	6	87976801	87976869	87922395	87941062
XLOC_046144	USO1	0.766926	0.000204369	6	92296768	92296950	92297159	92378158
XLOC_046168	SOWAHB	0.991862	8.88178e-16	6	93483707	93488932	93486378	93488711
XLOC_046205	PRKG2	0.807576	5.06587e-05	6	97638428	97645802	97652569	97735626
XLOC_046383	SLBP	0.726469	0.000639161	6	109608056	109610226	109613823	109629337
XLOC_046796	S1PR2	0.700092	0.00121663	7	16019806	16020245	15974816	15982578
XLOC_047181	MGAT1	0.728258	0.000610277	7	41363602	41364840	41337278	41354610
XLOC_047183	ZFP62	0.825734	2.43665e-05	7	41369720	41374327	41404242	41406959
XLOC_047296	ABCA7	0.72419	0.000677591	7	45154491	45154811	45165707	45182208
XLOC_047359	UBE2B	0.934012	1.46788e-08	7	47540939	47543296	47528581	47541198
XLOC_047435	CYSTM1	0.89362	5.87845e-07	7	53118015	53118491	53047810	53118491
XLOC_047509	NDFIP1	0.896221	4.86321e-07	7	55084689	55085730	55061328	55085013
XLOC_047898	ELL2	0.790191	9.54076e-05	7	97693722	97696893	97623184	97650531
XLOC_047907	CAST	0.983152	3.09641e-13	7	98579208	98581399	98444979	98581253
XLOC_047907	ERAP1	0.712894	0.000897867	7	98579208	98581399	98582890	98618194
XLOC_047946	RGMB	0.739499	0.000452646	7	100420888	100424329	100425877	100446422
XLOC_047966	PPIP5K2	0.803224	5.96999e-05	7	104654013	104656256	104559250	104642552
XLOC_048094	TBC1D9B	0.707003	0.00103458	7	1362876	1364215	1273635	1313897
XLOC_048254	CHERP	0.722164	0.000713365	7	6382578	6384872	6408552	6427823
XLOC_048432	PDE4A	0.842548	1.14454e-05	7	16132885	16132949	16176856	16215655
XLOC_048432	RAVER1	0.778796	0.000140109	7	16132885	16132949	16073297	16086918
XLOC_048432	TYK2	0.999552	0	7	16132885	16132949	16103271	16132860
XLOC_048557	DPP9	0.714626	0.000860667	7	20697036	20697339	20648283	20678569
XLOC_048557	TNFAIP8L1	0.803702	5.86426e-05	7	20697036	20697339	20697581	20716655
XLOC_048672	ALDH7A1	0.766236	0.000208759	7	28641207	28642939	28572141	28617279
XLOC_048699	SRFBP1	0.899917	3.68262e-07	7	33188554	33188746	33128260	33152038
XLOC_048807	7SK	0.850457	7.78008e-06	7	41122497	41122649	41115463	41115731
XLOC_048807	CLK4	0.98032	1.06382e-12	7	41122497	41122649	41100796	41122562
XLOC_048807	ZNF354A	0.740873	0.000435982	7	41122497	41122649	41154755	41179540
XLOC_049051	PCDH12	0.726165	0.000644178	7	54681948	54683974	54690461	54702923
XLOC_049052	PCDH12	0.859606	4.83925e-06	7	54684212	54685073	54690461	54702923
XLOC_049098	SH3TC2	0.771046	0.000179718	7	62381406	62382231	62392880	62446567
XLOC_049099	SH3TC2	0.714445	0.000864491	7	62382304	62386081	62392880	62446567
XLOC_049243	TMEM167A	0.817481	3.4318e-05	7	85267585	85267629	85222951	85267629
XLOC_049258	RASA1	0.758274	0.000265527	7	89423447	89423780	89281002	89391377
XLOC_049446	KIF13B	0.788039	0.000102769	8	9517716	9523734	9276105	9481183
XLOC_049608	NFIB	0.826332	2.37526e-05	8	30172539	30181067	30010801	30155742
XLOC_050382	SLC44A1	0.838713	1.36994e-05	8	96890637	96893578	96771691	96881711
XLOC_050471	INIP	0.835414	1.59321e-05	8	103651379	103653204	103669132	103695122
XLOC_050784	UHRF2	0.80727	5.12534e-05	8	38557642	38560958	38569327	38636946
XLOC_050887	KLF9	0.904461	2.57694e-07	8	46882968	46883277	46883356	46907760
XLOC_050939	TLE1	0.768731	0.000193238	8	58017751	58019448	57935462	58010785
XLOC_050969	ARHGEF39	0.969292	3.61087e-11	8	60261722	60262032	60247501	60251092
XLOC_050969	CA9	0.709853	0.000966429	8	60261722	60262032	60260367	60266465
XLOC_050969	TESK1	0.768396	0.000195262	8	60261722	60262032	60207472	60212368
XLOC_050969	TLN1	0.71503	0.000852163	8	60261722	60262032	60281244	60312068
XLOC_051493	CNTRL	0.868936	2.87874e-06	8	112429447	112432057	112418136	112498495
XLOC_051494	CNTRL	0.744065	0.000399219	8	112428696	112429414	112418136	112498495
XLOC_051886	RTN4IP1	0.962585	1.71702e-10	9	43883892	43884018	43832805	43884018
XLOC_052201	AKAP12	0.724888	0.000665615	9	89604071	89612974	89558649	89563595
XLOC_052204	CCDC170	0.946607	2.80697e-09	9	89779624	89782388	89715164	89780254
XLOC_052226	ESR1	0.977343	3.25207e-12	9	90255567	90260200	89969586	90255801
XLOC_052290	SYNJ2	0.952676	1.09002e-09	9	96090700	96095665	96023880	96091443
XLOC_052367	PHF10	0.738623	0.000463554	9	105096437	105097194	105074687	105089466
XLOC_052405	COL9A1	0.936228	1.12479e-08	9	9608699	9608712	9517340	9608712
XLOC_052779	CYB5R4	0.969554	3.3747e-11	9	66503045	66503274	66377732	66503245
XLOC_052829	AHI1	0.981975	5.29576e-13	9	74548896	74548919	74330947	74544060
XLOC_053424	RBMX2	0.790193	9.54021e-05	X	14291601	14292876	14270247	14282970
XLOC_053427	RBMX2	0.75964	0.000254958	X	14298248	14301947	14270247	14282970
XLOC_053644	IKBKG	0.707226	0.00102909	X	40554243	40555552	40501902	40519262
XLOC_053668	GPRASP2	0.830517	1.98176e-05	X	50528495	50531698	50528609	50531696
XLOC_054143	FAM120C	0.737973	0.000471795	X	97060658	97062145	96940223	97058719
XLOC_054769	ARHGEF6	0.842067	1.17093e-05	X	20264773	20269419	20273538	20389008
XLOC_054783	ATP11C	0.884488	1.10277e-06	X	23324957	23324986	23235986	23324986
XLOC_055080	AMMECR1	0.928121	2.85484e-08	X	63193166	63193217	63076962	63193217
XLOC_055337	FOXP3	0.822435	2.7999e-05	X	92380367	92382195	92369104	92375461
XLOC_055672	CA5B	0.972429	1.54002e-11	X	135049759	135049835	135022449	135049835
