# Supplementary material for: Transcriptome Analysis of Long Non-Coding RNA in the Bovine Mammary Gland Following Dietary Supplementation with Linseed and Safflower Oil<strong> </strong>
Source: Preprints.org preprint supplement (doi:10.20944/preprints201810.0185.v1), 2018-10-09
Supplement: Supplementary file 7 [file Supplementary file 2_Chromosomal distribution of lncRNAs.xlsx]

## Sheet: Additional File 2
Additional File 2: Chromosomal distribution of identified novel and known lncRNA genes
Chromosome	Number of novel lncRNAs	Number of known lncRNAs	Total
1	195	17	212
2	143	12	155
3	258	20	278
4	159	17	176
5	234	13	247
6	195	10	205
7	234	20	254
8	223	17	240
9	137	7	144
10	223	16	239
11	190	11	201
12	118	10	128
13	148	9	157
14	128	7	135
15	129	10	139
16	134	16	150
17	149	3	152
18	222	10	232
19	220	8	228
20	94	1	95
21	141	14	155
22	100	9	109
23	138	11	149
24	78	9	87
25	106	2	108
26	54	9	63
27	63	5	68
28	99	6	105
29	83	7	90
X	209	16	225
MT	1	3	4
GJ….	25	0	25
Total	4630	325	4955
